# Supplementary material for: The Emerging Role of Long Non-Coding RNAs in Development and Function of Gilthead Sea Bream (Sparus aurata) Fast Skeletal Muscle
Source: Cells. 2022 Jan 26;11(3):428. doi: 10.3390/cells11030428 (PMC8834446; doi:10.3390/cells11030428)
Supplement: Supplementary file 1 [file cells-11-00428-s001.zip]

Archive with 5 entries (5 files):
- SUPPLEMENTARY FILES/Supplementary_File_1.txt
- SUPPLEMENTARY FILES/Supplementary_File_2.pdf
- SUPPLEMENTARY FILES/Supplementary_File_3.txt
- SUPPLEMENTARY FILES/Supplementary_File_4.pdf
- SUPPLEMENTARY FILES/Supplementary_File_5.pdf
