# Supplementary material for: The Emerging Role of Long Non-Coding RNAs in Development and Function of Gilthead Sea Bream (Sparus aurata) Fast Skeletal Muscle
Source: Cells. 2022 Jan 26;11(3):428. doi: 10.3390/cells11030428 (PMC8834446; doi:10.3390/cells11030428)
Supplement: Supplementary file 1 [file cells-11-00428-s001.zip › SUPPLEMENTARY FILES/Supplementary_File_1.txt]

>ENSSAUG00010000034|capn2b
atgtccggcgtggcctccaccctggccaagaagcgggccctggctgcgggcttcggcaccaacgccaatgcgacgcggtacctgaaccaggacttcaagaccctgcgggctcagtgtagttccgccgggaagctgttctgcgacccgaccttccccgccgcgcccgaagcgctgggcttcaacgagctgggccggagctcctacaaggtccgcggagtcacctggaagagacccacggaactggtctctaatcctgagttcatcttgggcggagccaccaggaccgacatctgccagggagctctaggtgactgctggctgttggcggccatcgcctcgctgacccttaacgagtatgtgatggccagagtcgttcccactgaccagggcttcggtgacgactacgccggcatcttccacttccagttctggcagtttggtgagtgggtggacgtggtgatcgacgaccgcctgccggtcaaagatggagagctgatgttcgtccactcggcggaggggagggagttctggagcgctctgctggagaaagcctacgccaaagtgaacggctgctatgaagcgctgtctggcggttccaccactgaaggatttgaagatttcaccggtggcatcgctgagaactacgacctccaacgtccccccgccaacctgttccagatcatcaagaaggccctggaggctggagcgctgctgggctgctccatcgacatcaccagcgccgcagactcggaggccgtcacccgtcagaagctggtgaaaggccacgcctactcactgacgggagctgtggaggtgaacttccgtggccggaatgagcggctggtgaggatgaggaacccgtggggtcaggtggagtggaccggagcgtggagcgacggatcgtctgagtggagccaggtgcagggagactgtccacatgccaacgcagaggacggagagttctggatgtccttcagcgacttctgccgtcactataatcgtgttgagttgtgcactctgacccccgacaccatcgaagatgactctgtgaaacactggagcgtcagcaagttcgatggctcctggaggagaggatccaccgctggaggctgcaggaaccacccctacacgttctggatgaatcctcagtttgtgatcaagctggatgaggaggatgatgaccccgatgatggcgaagtgggctgcagctttgtggtcggtctgatccagaagaaccgcagaaagctccggaaacaaggagaggacatgcacaccgttgggtttgccatctatgaggttccaaaggagtttcaaggccagagggaggtgcatctggacaagaactacttcctgacccacgctcagacggcaaagtccgaaaccttcatcaacctgcgtgaggtttgctctcgcttcaagctgcccccgggagagtacctgatcgtcccgtccaccttcgaaccgcatctcaacggagacttctgcatccgtgtgttctctgagaagcagactgagacccagccctgtgacgacccggtccaggctgaactagatgatgagacggtgtctgatgaggacgtggacgcagggttcagaggactcttctcgaaactcgctggagacgacatggagatctcagcggtggagctcaggaccatcatgaacaagatcgtctccaaacgaactgacatcaaaactgacggcttcagcctggagacctgcagggtcatggtcaacctgatggatgacagcgggaacgggaagctcggccttggagagttcgccaccttgtggaagaaggtgcagagatacctgtccatctataagaagaacgactcggacaactcggggacgatgagcacgccggagatgagagtcgcctttaaagacgcaggtttcagcctcaacaacaccatctaccagctgctggtggctcgatactccgacccagacatgaccatcgacttcgacaacttcgtgggctgtctgatgaggctggagatgatgttcaggatcttcaagaagctcgacgctcaggacagcggctccatcgagctcgacttcaaccagtggttaaacttcgccatgatctgagccggcgctccgcgttggcccggagctccagtgttactgcaggacgccatatttgtgtttacagctgcagcttctcttctttcactccgtatgttttctgtgtatccaccacatgactgacaccatgtaccatgaaaagtcaataaatgtatccagaactcttt
>ENSSAUG00010000034|capn2b
tggctgctggagcggatcagaactctgccacagtgttggatcatcaggagaagaggacgggccctggctgcgggcttcggcaccaacgccaatgcgacgcggtacctgaaccaggacttcaagaccctgcgggctcagtgtagttccgccgggaagctgttctgcgacccgaccttccccgccgcgcccgaagcgctgggcttcaacgagctgggccggagctcctacaaggtccgcggagtcacctggaagagacccacggaactggtctctaatcctgagttcatcttgggcggagccaccaggaccgacatctgccagggagctctaggtgactgctggctgttggcggccatcgcctcgctgacccttaacgagtatgtgatggccagagtcgttcccactgaccagggcttcggtgacgactacgccggcatcttccacttccagttctggcagtttggtgagtgggtggacgtggtgatcgacgaccgcctgccggtcaaagatggagagctgatgttcgtccactcggcggaggggagggagttctggagcgctctgctggagaaagcctacgccaaagtgaacggctgctatgaagcgctgtctggcggttccaccactgaaggatttgaagatttcaccggtggcatcgctgagaactacgacctccaacgtccccccgccaacctgttccagatcatcaagaaggccctggaggctggagcgctgctgggctgctccatcgacatcaccagcgccgcagactcggaggccgtcacccgtcagaagctggtgaaaggccacgcctactcactgacgggagctgtggaggtgaacttccgtggccggaatgagcggctggtgaggatgaggaacccgtggggtcaggtggagtggaccggagcgtggagcgacggatcgtctgagtggagccaggtgcagggagactgtccacatgccaacgcagaggacggagagttctggatgtccttcagcgacttctgccgtcactataatcgtgttgagttgtgcactctgacccccgacaccatcgaagatgactctgtgaaacactggagcgtcagcaagttcgatggctcctggaggagaggatccaccgctggaggctgcaggaaccacccctacacgttctggatgaatcctcagtttgtgatcaagctggatgaggaggatgatgaccccgatgatggcgaagtgggctgcagctttgtggtcggtctgatccagaagaaccgcagaaagctccggaaacaaggagaggacatgcacaccgttgggtttgccatctatgaggtgagaactgaagacactttaggccagagggaggtgcatctggacaagaactacttcctgacccacgctcagacggcaaagtccgaaaccttcatcaacctgcgtgaggtttgctctcgcttcaagctgcccccgggagagtacctgatcgtcccgtccaccttcgaaccgcatctcaacggagacttctgcatccgtgtgttctctgagaagcagactgagacccaacaggtgtgccctgacctgcaggtgtccagctgtgacatgttccctgttgtgtttcaggacatggagatctcagcggtggagctcaggaccatcatgaacaagatcgtctccaaacgtacgtcaaagctaaagcttcagcacctgctcacctgctcacctgctcacttatcctcaactgttgagcaggacagcgggaacgggaagctcggccttggagagttcgccaccttgtggaagaaggtgcagagatacctgtccatctataagaagaacgactcggacaactcggggacgatgagcacgccggagatgagagtcgcctttaaagacgcaggtttcagcctcaacaacaccatctaccagctgctggtggctcgatactccgacccagacatgaccatcgacttcgacaacttcgtgggctgtctgatgaggctggagatgatgttcaggatcttcaagaagctcgacgctcaggacagcggctccatcgagctcgacttcaaccaggtgagaaccaacaacacgaacttcatcatgttgaatcggaccaggtttcgcctctga
>ENSSAUG00010000034|capn2b
atgtccggcgtggcctccaccctggccaagaagcgggccctggctgcgggcttcggcaccaacgccaatgcgacgcggtacctgaaccaggacttcaagaccctgcgggctcagtgtagttccgccgggaagctgttctgcgacccgaccttccccgccgcgcccgaagcgctgggcttcaacgagctgggccggagctcctacaaggtccgcggagtcacctggaagagacccacggaactggtctctaatcctgagttcatcttgggcggagccaccaggaccgacatctgccagggagctctaggtgactgctggctgttggcggccatcgcctcgctgacccttaacgagtatgtgatggccagagtcgttcccactgaccagggcttcggtgacgactacgccggcatcttccacttccagttctggcagtttggtgagtgggtggacgtggtgatcgacgaccgcctgccggtcaaagatggagagctgatgttcgtccactcggcggaggggagggagttctggagcgctctgctggagaaagcctacgccaaagtgaacggctgctatgaagcgctgtctggcggttccaccactgaaggatttgaagatttcaccggtggcatcgctgagaactacgacctccaacgtccccccgccaacctgttccagatcatcaagaaggccctggaggctggagcgctgctgggctgctccatcgacatcaccagcgccgcagactcggaggccgtcacccgtcagaagctggtgaaaggccacgcctactcactgacgggagctgtggaggtgaacttccgtggccggaatgagcggctggtgaggatgaggaacccgtggggtcaggtggagtggaccggagcgtggaagaatggctggatgtccttcagcgacttctgccgtcactataatcgtgttgagttgtgcactctgacccccgacaccatcgaagatgactctgtgaaacactggagcgtcagcaagttcgatggctcctggaggagaggatccaccgctggaggctgcaggaaccacccctacacgttctggatgaatcctcagtttgtgatcaagctggatgaggaggatgatgaccccgatgatggcgaagtgggctgcagctttgtggtcggtctgatccagaagaaccgcagaaagctccggaaacaaggagaggacatgcacaccgttgggtttgccatctatgaggtgagaactgaagacactttaggccagagggaggtgcatctggacaagaactacttcctgacccacgctcagacggcaaagtccgaaaccttcatcaacctgcgtgaggtttgctctcgcttcaagctgcccccgggagagtacctgatcgtcccgtccaccttcgaaccgcatctcaacggagacttctgcatccgtgtgttctctgagaagcagactgagacccacggtggagctcaggaccatcatgaacaagatcgtctccaaacgtacgtcaaagctaaagcttcagcacctgctcacctgctcacctgctcacttgttcacctgctcacctgctcacctataacttcctgtctctccctcacaggaactgacatcaaaactgacggcttcagcctggagacctgcagggtcatggtcaacctgatggatgacagcgggaacgggaagctcggccttggagagttcgccaccttgtggaagaaggtgcagagatacctgtccatctataagaagaacgactcggacaactcggggacgatgagcacgccggagatgagagtcgcctttaaagacgcaggtttcagcctcaacaacaccatctaccagctgctggtggctcgatactccgacccagacatgaccatcgacttcgacaacttcgtgggctgtctgatgaggctggagatgatgttcaggatcttcaagaagctcgacgctcaggacagcggctccatcgagctcgacttcaaccaggtgagaaccaacaacacgaacttcatcatgttgaatcggaccaggtttcgcctctga
>ENSSAUG00010000034|capn2b
atgtccggcgtggcctccaccctggccaagaagcgggccctggctgcgggcttcggcaccaacgccaatgcgacgcggtacctgaaccaggacttcaagaccctgcgggctcagtgtagttccgccgggaagctgttctgcgacccgaccttccccgccgcgcccgaagcgctgggcttcaacgagctgggccggagctcctacaaggtccgcggagtcacctggaagagacccacggaactggtctctaatcctgagttcatcttgggcggagccaccaggaccgacatctgccagggagctctaggtgactgctggctgttggcggccatcgcctcgctgacccttaacgagtatgtgatggccagagtcgttcccactgaccagggcttcggtgacgactacgccggcatcttccacttccagttctggcagtttggtgagtgggtggacgtggtgatcgacgaccgcctgccggtcaaagatggagagctgatgttcgtccactcggcggaggggagggagttctggagcgctctgctggagaaagcctacgccaaagtgaacggctgctatgaagcgctgtctggcggttccaccactgaaggatttgaagatttcaccggtggcatcgctgagaactacgacctccaacgtccccccgccaacctgttccagatcatcaagaaggccctggaggctggagcgctgctgggctgctccatcgacatcaccagcgccgcagactcggaggccgtcacccgtcagaagctggtgaaaggccacgcctactcactgacgggagctgtggaggtgaacttccgtggccggaatgagcggctggtgaggatgaggaacccgtggggtcaggtggagtggaccggagcgtggagcgacggatcgtctgagtggagccaggtgcagggagactgtccacatgccaacgcagaggacggagagttctggatgtccttcagcgacttctgccgtcactataatcgtgttgagttgtgcactctgacccccgacaccatcgaagatgactctgtgaaacactggagcgtcagcaagttcgatggctcctggaggagaggatccaccgctggaggctgcaggaaccacccctacacgttctggatgaatcctcagtttgtgatcaagctggatgaggaggatgatgaccccgatgatggcgaagtgggctgcagctttgtggtcggtctgatccagaagaaccgcagaaagctccggaaacaaggagaggacatgcacaccgttgggtttgccatctatgaggtgagaactgaagacactttaggtttaggaccagatcaatacaactacttcctgacccacgctcagacggcaaagtccgaaaccttcatcaacctgcgtgaggtttgctctcgcttcaagctgcccccgggagagtacctgatcgtcccgtccaccttcgaaccgcatctcaacggagacttctgcatccgtgtgttctctgagaagcagactgagacccacggtggagctcaggaccatcatgaacaagatcgtctccaaacgtacgtcaaagctaaagcttcagcacctgctcacctgctcacctgctcacttgttcacctgctcacctgctcacctataacttcctgtctctccctcacaggaactgacatcaaaactgacggcttcagcctggagacctgcagggtcatggtcaacctgatggatgacagcgggaacgggaagctcggccttggagagttcgccaccttgtggaagaaggtgcagagatacctgtccatctataagaagaacgactcggacaactcggggacgatgagcacgccggagatgagagtcgcctttaaagacgcaggtttcagcctcaacaacaccatctaccagctgctggtggctcgatactccgacccagacatgaccatcgacttcgacaacttcgtgggctgtctgatgaggctggagatgatgttcagtgagtcacaccgagctacacgtcaactacaactcccaacatgcactgtgagaaccaacaacacgaacttcatcatgttgaatcggaccaggtttcgcctctga
>ENSSAUG00010000034|capn2b
atcatgtccggcgtggcctccaccctggccaagaagcgggccctggctgcgggcttcggcaccaacgccaatgcgacgcggtacctgaaccaggacttcaagaccctgcgggctcagtgtagttccgccgggaagctgttctgcgacccgaccttccccgccgcgcccgaagcgctgggcttcaacgagctgggccggagctcctacaaggtccgcggagtcacctggaagagacccacggaactggtctctaatcctgagttcatcttgggcggagccaccaggaccgacatctgccagggagctctaggtgactgctggctgttggcggccatcgcctcgctgacccttaacgagtatgtgatggccagagtcgttcccactgaccagggcttcggtgacgactacgccggcatcttccacttccagttctggcagtttggtgagtgggtggacgtggtgatcgacgaccgcctgccggtcaaagatggagagctgatgttcgtccactcggcggaggggagggagttctggagcgctctgctggagaaagcctacgccaaagtgaacggctgctatgaagcgctgtctggcggttccaccactgaaggatttgaagatttcaccggtggcatcgctgagaactacgacctccaacgtccccccgccaacctgttccagatcatcaagaaggccctggaggctggagcgctgctgggctgctccatcgacatcaccagcgccgcagactcggaggccgtcacccgtcagaagctggtgaaaggccacgcctactcactgacgggagctgtggaggtgaacttccgtggccggaatgagcggctggtgaggatgaggaacccgtggggtcaggtggagtggaccggagcgtggagcgacggatcgtctgagtggagccaggtgcagggagactgtccacatgccaacgcagaggacggagagttctggatgtccttcagcgacttctgccgtcactataatcgtgttgagttgtgcactctgacccccgacaccatcgaagatgactctgtgaaacactggagcgtcagcaagttcgatggctcctggaggagaggatccaccgctggaggctgcaggaaccacccctacacgttctggatgaatcctcagtttgtgatcaagctggatgaggaggatgatgaccccgatgatggcgaagtgggctgcagctttgtggtcggtctgatccagaagaaccgcagaaagctccggaaacaaggagaggacatgcacaccgttgggtttgccatctatgaggtgagaactgaagacactttaggccagagggaggtgcatctggacaagaactacttcctgacccacgctcagacggcaaagtccgaaaccttcatcaacctgcgtgaggtttgctctcgcttcaagctgcccccgggagagtacctgatcgtcccgtccaccttcgaaccgcatctcaacggagacttctgcatccgtgtgttctctgagaagcagactgagacccagccctgtgacgacccggtccaggctgaactagatgatgagacggtgtctgatgaggacgtggacgcagggttcagaggactcttctcgaaactcgctggagacgacatggagatctcagcggtggagctcaggaccatcatgaacaagatcgtctccaaacgaactgacatcaaaactgacggcttcagcctggagacctgcagggtcatggtcaacctgatggatgtatccttctttagcttcccggcgctccgcagtcagaaccgatccatctataagaagaacgactcggacaactcggggacgatgagcacgccggagatgagagtcgcctttaaagacgcaggtttcagcctcaacaacaccatctaccagctgctggtggctcgatactccgacccagacatgaccatcgacttcgacaacttcgtgggctgtctgatgaggctggagatgatgttcaggatcttcaagaagctcgacgctcaggacagcggctccatcgagctcgacttcaaccaggtgagaaccaacaacacgaacttcatcatgttgaatcggaccaggtttcgcctctga
>ENSSAUG00010000034|capn2b
atgtccggcgtggcctccaccctggccaagaagcgggccctggctgcgggcttcggcaccaacgccaatgcgacgcggtacctgaaccaggacttcaagaccctgcgggctcagtgtagttccgccgggaagctgttctgcgacccgaccttccccgccgcgcccgaagcgctgggcttcaacgagctgggccggagctcctacaaggtccgcggagtcacctggaagagacccacggaactggtctctaatcctgagttcatcttgggcggagccaccaggaccgacatctgccagggagctctaggtgactgctggctgttggcggccatcgcctcgctgacccttaacgagtatgtgatggccagagtcgttcccactgaccagggcttcggtgacgactacgccggcatcttccacttccagttctggcagtttggtgagtgggtggacgtggtgatcgacgaccgcctgccggtcaaagatggagagctgatgttcgtccactcggcggaggggagggagttctggagcgctctgctggagaaagcctacgccaaagtgaacggctgctatgaagcgctgtctggcggttccaccactgaaggatttgaagatttcaccggtggcatcgctgagaactacgacctccaacgtccccccgccaacctgttccagatcatcaagaaggccctggaggctggagcgctgctgggctgctccatcgacatcaccagcgccgcagactcggaggccgtcacccgtcagaagctggtgaaaggccacgcctactcactgacgggagtgaacttccgtggccggaatgagcggctggtgaggatgaggaacccgtggggtcaggtggagtggaccggagcgtggagcgacggatcgtctgagtggagccaggtgcagggagactgtccacatgccaacgcagaggacggagagttctggatgtccttcagcgacttctgccgtcactataatcgtgttgagttgtgcactctgacccccgacaccatcgaagatgactctgtgaaacactggagcgtcagcaagttcgatggctcctggaggagaggatccaccgctggaggctgcaggaaccacccctacacgttctggatgaatcctcagtttgtgatcaagctggatgaggaggatgatgaccccgatgatggcgaagtgggctgcagctttgtggtcggtctgatccagaagaaccgcagaaagctccggaaacaaggagaggacatgcacaccgttgggtttgccatctatgaggtgagaactgaagacactttaggccagagggaggtgcatctggacaagaactacttcctgacccacgctcagacggcaaagtccgaaaccttcatcaacctgcgtgaggtttgctctcgcttcaagctgcccccgggagagtacctgatcgtcccgtccaccttcgaaccgcatctcaacggagacttctgcatccgtgtgttctctgagaagcagactgagacccagccctgtgacgacccggtccaggctgaactagatgatacggtgtctgatgaggacgtggacgcagggttcagaggactcttctcgaaactcgctggagacgacatggagatctcagcggtggagctcaggaccatcatgaacaagatcgtctccaaacgaactgacatcaaaactgacggcttcagcctggagacctgcagggtcatggtcaacctgatggatgacagcgggaacgggaagctcggccttggagagttcgccaccttgtggaagaaggtgcagagatacctggtaagaagtgcgacctttgaccctcagagtttcagcctcaacaacaccatctaccagctgctggtggctcgatactccgacccagacatgaccatcgacttcgacaacttcgtgggctgtctgatgaggctggagatgatgttcagtgagtcacaccgagctacacgtcaactacaactcccaacatgcactgcactaacattgtgtgatacatgtggatattcattttattgtttgtttgtttgtttagtggttctgatcatgttattctga
>ENSSAUG00010000077|capn1b
cttaaacagtgtagagctgctcacagaactggaccagaaccagctcaactttcacagaactgcagatttactggatccagtgttctgtctctttaacacctccatgttgtgacgatgacgatatggccccgcccgtcccaccgggcggggctcacactgcaacacagcatccacaacagcatccactactgcacacagagccagtaccggcactactgcacacagaaccagtaccagtactactcctcagtactgacagcatcccgactgagacacgaggagcgacacggagcttccagcgagctcattggacggagatcaggatgagtggaggcatatctgggtggatccagaaggaacggcagaaggctggaggtctgggctcagtccagcaggctgtacgctaccagaaccaggacttccaggccctgaaggaggagtgtctgcagaatgactccttgtttgaggacccaatgttccctgcagaacctacttctctgggtttcaaggagctgggaccgttcaccgccaaaaccagaggggtggagtggaagagaccgatggagctgacagagaatcctcagttcatcgtgggcggggccaccaggacagacatctgtcagggagcgctgggtgactgctggctgctggctgcgattggctctctgactctgaatgagcggctgctgcatcgcgtcgttcctcacggccagacctttaatcgccaatacgccggcatcttccacttccagttctggcagtttggtgagtgggttgacgtggtgatcgacgaccgtctgccggtcaaagatggagagctgctgttcgtccactcagctgaaggcagcgagttctggagcgctctgctggagaaagcctacgccaagctgaacggctcgtacgaggcgttgtccggcggcagcaccactgaaggtttcgaggactttacgggcggtgtgtctgagatgtacgaactgaagaaagctcccagagatctttatcgtatcatcggcaaagctctggagagaggatcactgctgggctgctcgatagacatcaccagtgccttcgacatggaggcggtgaccttcaagaagttggttaaaggccacgcctactctgtgactgcactcagacaggtggagtaccgcggtcggcaggagcgtctgatccgcatcaggaacccctggggtcaggtggagtggaccggcgcctggagtgacaattcctcagagtggagctccatcgactctgcagagaaagacgagctgctctgcaagatggaggacggagagttctggatgtctttccaggagttcctccgtcagttctccaggttggagatctgtaatctgaccccggacgctctcagtgaggactccaccagtttctggaacactacgatgttcgagggcggctggaggagaggaagtaccgccggaggctgcaggaaccatcccaacacattctggatcaaccctcagtataaaatctgcctgctggaggaggatgacgacccggaggatgacgaggcagcctgcagcttcctggtggctctgatgcagaaagatcgccgccgctaccgccgccacggccaggacgtgcacaccatcggcttcgccatctatgagtaccgaggctgtcacggtgtccatatgaagaaggacttcttcctgcgtcactcgtcctgcgctcgctcagagaccttcatcaacctgcgagaggtgagcaccaggctccgcctcccgcccggcgagtacctgattgtcccgtcgaccttcgaacccgccaaggaggccgactttgtcctaagggacatggagatctcagtccgggagctcaggaccatcctcaaccgggtcgtgtctaaacacagagacctgcagactgacggcttcagtctggagtcctgcagagccatggtcagcctcatggacaaagacggcagcgctcgactcggtctggtggagtttcagatcctctggaacaagatcaggaagtggctggggatcttcagagagttcgatctggataaatctggatgtatgagctcgtacgagttgcgtctggcgttggaaaatggcgggttcaaactcaacaacaagttgtatcagatgctggtcgctcgatacgccgacagcgagatcatcgacttcgacaacttcacctgctgtctggtcaaactggaggccatgttcaaggccttccaggagctggaccgagacgggacaggcagtgcagagatcaacatcatcgaggtaccaaacacgaaaccaacttcactcaatcagtaa
>ENSSAUG00010000034|capn2b
atgtccggcgtggcctccaccctggccaagaagcgggccctggctgcgggcttcggcaccaacgccaatgcgacgcggtacctgaaccaggacttcaagaccctgcgggctcagtgtagttccgccgggaagctgttctgcgacccgaccttccccgccgcgcccgaagcgctgggcttcaacgagctgggccggagctcctacaaggtccgcggagtcacctggaagagacccacggaactggtctctaatcctgagttcatcttgggcggagccaccaggaccgacatctgccagggagctctaggtgactgctggctgttggcggccatcgcctcgctgacccttaacgagtatgtgatggccagagtcgttcccactgaccagggcttcggtgacgactacgccggcatcttccacttccagttctggcagtttggtgagtgggtggacgtggtgatcgacgaccgcctgccggtcaaagatggagagctgatgttcgtccactcggcggaggggagggagttctggagcgctctgctggagaaagcctacgccaaagtgaacggctgctatgaagcgctgtctggcggttccaccactgaaggatttgaagatttcaccggtggcatcgctgagaactacgacctccaacgtccccccgccaacctgttccagatcatcaagaaggccctggaggctggagcgctgctgggctgctccatcgacatcaccagcgccgcagactcggaggccgtcacccgtcagaagctggtgaaaggccacgcctactcactgacgggagctgtggaggtgaacttccgtggccggaatgagcggctggtgaggatgaggaacccgtggggtcaggtggagtggaccggagcgtggagcgacggatcgtctgagtggagccaggtgcagggagactgtccacatgccaacgcagaggacggagagttctggatgtccttcagcgacttctgccgtcactataatcgtgttgagttgtgcactctgacccccgacaccatcgaagatgactctgtgaaacactggagcgtcagcaagttcgatggctcctggaggagaggatccaccgctggaggctgcaggaaccacccctacacgttctggatgaatcctcagtttgtgatcaagctggatgaggaggatgatgaccccgatgatggcgaagtgggctgcagctttgtggtcggtctgatccagaagaaccgcagaaagctccggaaacaaggagaggacatgcacaccgttgggtttgccatctatgaggtgagaactgaagacactttaggccagagggaggtgcatctggacaagaactacttcctgacccacgctcagacggcaaagtccgaaaccttcatcaacctgcgtgaggtttgctctcgcttcaagctgcccccgggagagtacctgatcgtcccgtccaccttcgaaccgcatctcaacggagacttctgcatccgtgtgttctctgagaagcagactgagacccaaggactcttctcgaaactcgctggagacgacatggagatctcagcggtggagctcaggaccatcatgaacaagatcgtctccaaacgaactgacatcaaaactgacggcttcagcctggagacctgcagggtcatggtcaacctgatggatcaggacagcgggaacgggaagctcggccttggagagttcgccaccttgtggaagaaggtgcagagatacctgtccatctataagaagaacgactcggacaactcggggacgatgagcacgccggagatgagagtcgcctttaaagacgcaggtttcagcctcaacaacaccatctaccagctgctggtggctcgatactccgacccagacatgaccatcgacttcgacaacttcgtgggctgtctgatgaggctggagatgatgttcagtgagtcacaccgaaagctcgacgctcaggacagcggctccatcgagctcgacttcaaccaggtgagaaccaacaacacgaacttcatcatgttgaatcggaccaggtttcgcctctga
>ENSSAUG00010000034|capn2b
ttggagcctttgtgtaagcgggccctggctgcgggcttcggcaccaacgccaatgcgacgcggtacctgaaccaggacttcaagaccctgcgggctcagtgtagttccgccgggaagctgttctgcgacccgaccttccccgccgcgcccgaagcgctgggcttcaacgagctgggccggagctcctacaaggtccgcggagtcacctggaagagacccacggaactggtctctaatcctgagttcatcttgggcggagccaccaggaccgacatctgccagggagctctaggtgactgctggctgttggcggccatcgcctcgctgacccttaacgagtatgtgatggccagagtcgttcccactgaccagggcttcggtgacgactacgccggcatcttccacttccagttctggcagtttggtgagtgggtggacgtggtgatcgacgaccgcctgccggtcaaagatggagagctgatgttcgtccactcggcggaggggagggagttctggagcgctctgctggagaaagcctacgccaaagtgaacggctgctatgaagcgctgtctggcggttccaccactgaaggatttgaagatttcaccggtggcatcgctgagaactacgacctccaacgtccccccgccaacctgttccagatcatcaagaaggccctggaggctggagcgctgctgggctgctccatcgacatcaccagcgccgcagactcggaggccgtcacccgtcagaagctggtgaaaggccacgcctactcactgacgggagctgtggaggtgaacttccgtggccggaatgagcggctggtgaggatgaggaacccgtggggtcaggtggagtggaccggagcgtggagcgacggatcgtctgagtggagccaggtgcagggagactgtccacatgccaacgcagaggacggagagttctggatgtccttcagcgacttctgccgtcactataatcgtgttgagttgtgcactctgacccccgacaccatcgaagatgactctgtgaaacactggagcgtcagcaagttcgatggctcctggaggagaggatccaccgctggaggctgcaggaaccacccctacacgttctggatgaatcctcagtttgtgatcaagctggatgaggaggatgatgaccccgatgatggcgaagtgggctgcagctttgtggtcggtctgatccagaagaaccgcagaaagctccggaaacaaggagaggacatgcacaccgttgggtttgccatctatgaggtgagaactgaagacactttaggccagagggaggtgcatctggacaagaactacttcctgacccacgctcagacggcaaagtccgaaaccttcatcaacctgcgtgaggtttgctctcgcttcaagctgcccccgggagagtacctgatcgtcccgtccaccttcgaaccgcatctcaacggagacttctgcatccgtgtgttctctgagaagcagactgagacccacggtggagctcaggaccatcatgaacaagatcgtctccaaacgtacgtcaaagctaaagcttcagcacctgctcacctgctcacctgctcacttgttcacctgctcacctgctcacctataacttcctgtctctccctcacaggaactgacatcaaaactgacggcttcagcctggagacctgcagggtcatggtcaacctgatggatcaggacagcgggaacgggaagctcggccttggagagttcgccaccttgtggaagaaggtgcagagatacctgtccatctataagaagaacgactcggacaactcggggacgatgagcacgccggagatgagagtcgcctttaaagacgcaggtttcagcctcaacaacaccatctaccagctgctggtggctcgatactccgacccagacatgaccatcgacttcgacaacttcgtgggctgtctgatgaggctggagatgatgttcaggatcttcaagaagctcgacgctcaggacagcggctccatcgagctcgacttcaaccaggtgagaaccaacaacacgaacttcatcatgttgaatcggaccaggtttcgcctctga
>ENSSAUG00010000355|CAV3
atgcctgcttctgtctttgtggttttgactgtagccacatggctgtcatctccgccactctggctttattatctcagcttcagcctgctccgtcagtcagacaccaggaccatggctgaaagtaacgaggaggagctgctgatcagcgaaagcatcactgtggagattaacttgaacgacagggaccccaagcaaatcactgagggtgtggacaaggtcgactttgaagatgtgatagcagagcctgccggcgtacgcagtgtggattgtgtgtggaaatacagcttcaaaaccttcacagtgtcaaagcactgggtttatcgtggcctgactgccatctttggcttacctttgtcgctgctctggggcttgctgtttgcttttctgtcattcttgcagatctgggttgttgcgccctgcattaagagcttaaagtttgagttccagtgtctgtgtcaacccctcttgcaggtcacgaagaccgttgttcgcccagtgctcaaaatggtggcgaaggtatatggcagtgtgaaagggatggtacgaaaggaggcttga
>ENSSAUG00010000034|capn2b
atgtccggcgtggcctccaccctggccaagaagcgggccctggctgcgggcttcggcaccaacgccaatgcgacgcggtacctgaaccaggacttcaagaccctgcgggctcagtgtagttccgccgggaagctgttctgcgacccgaccttccccgccgcgcccgaagcgctgggcttcaacgagctgggccggagctcctacaaggtccgcggagtcacctggaagagacccacggaactggtctctaatcctgagttcatcttgggcggagccaccaggaccgacatctgccagggagctctaggtgactgctggctgttggcggccatcgcctcgctgacccttaacgagtatgtgatggccagagtcgttcccactgaccagggcttcggtgacgactacgccggcatcttccacttccagttctggcagtttggtgagtgggtggacgtggtgatcgacgaccgcctgccggtcaaagatggagagctgatgttcgtccactcggcggaggggagggagttctggagcgctctgctggagaaagcctacgccaaagtgaacggctgctatgaagcgctgtctggcggttccaccactgaaggatttgaagatttcaccggtggcatcgctgagaactacgacctccaacgtccccccgccaacctgttccagatcatcaagaaggccctggaggctggagcgctgctgggctgctccatcgacatcaccagcgccgcagactcggaggccgtcacccgtcagaagctggtgaaaggccacgcctactcactgacgggagctgtggaggtgaacttccgtggccggaatgagcggctggtgaggatgaggaacccgtggggtcaggtggagtggaccggagcgtggagcgacggatcgtctgagtggagccaggtgcagggagactgtccacatgccaacgcagaggacggagagttctggatgtccttcagcgacttctgccgtcactataatcgtgttgagttgtgcactctgacccccgacaccatcgaagatgactctgtgaaacactggagcgtcagcaagttcgatggctcctggaggagaggatccaccgctggaggctgcaggaaccacccctacacgttctggatgaatcctcagtttgtgatcaagctggatgaggaggatgatgaccccgatgatggcgaagtgggctgcagctttgtggtcggtctgatccagaagaaccgcagaaagctccggaaacaaggagaggacatgcacaccgttgggtttgccatctatgaggtgagaactgaagacactttaggccagagggaggtgcatctggacaagaactacttcctgacccacgctcagacggcaaagtccgaaaccttcatcaacctgcgtgaggtttgctctcgcttcaagctgcccccgggagagtacctgatcgtcccgtccaccttcgaaccgcatctcaacggagacttctgcatccgtgtgttctctgagaagcagactgagacccagccctgtgacgacccggtccaggctgaactagatgatgtgtgccctgacctgcaggtgtccagctgtgacatgttccctgttgtgtttcaggacatggagatctcagcggtggagctcaggaccatcatgaacaagatcgtctccaaacgaactgacatcaaaactgacggcttcagcctggagacctgcagggtcatggtcaacctgatggatcaggacagcgggaacgggaagctcggccttggagagttcgccaccttgtggaagaaggtgcagagatacctggtaagaagtaagaacgactcggacaactcggggacgatgagcacgccggagatgagagtcgcctttaaagacgcaggtttcagcctcaacaacaccatctaccagctgctggtggctcgatactccgacccagacatgaccatcgacttcgacaacttcgtgggctgtctgatgaggctggagatgatgttcagtgagtcacaccgagctacacgtcaactacaactcccaacatgcacttggttaaacttcgccatgatctga
>ENSSAUG00010000034|capn2b
atgtccggcgtggcctccaccctggccaagaagcgggccctggctgcgggcttcggcaccaacgccaatgcgacgcggtacctgaaccaggacttcaagaccctgcgggctcagtgtagttccgccgggaagctgttctgcgacccgaccttccccgccgcgcccgaagcgctgggcttcaacgagctgggccggagctcctacaaggtccgcggagtcacctggaagagacccacggaactggtctctaatcctgagttcatcttgggcggagccaccaggaccgacatctgccagggagctctaggtgactgctggctgttggcggccatcgcctcgctgacccttaacgagtatgtgatggccagagtcgttcccactgaccagggcttcggtgacgactacgccggcatcttccacttccagttctggcagtttggtgagtgggtggacgtggtgatcgacgaccgcctgccggtcaaagatggagagctgatgttcgtccactcggcggaggggagggagttctggagcgctctgctggagaaagcctacgccaaagtgaacggctgctatgaagcgctgtctggcggttccaccactgaaggatttgaagatttcaccggtggcatcgctgagaactacgacctccaacgtccccccgccaacctgttccagatcatcaagaaggccctggaggctggagcgctgctgggctgctccatcgacatcaccagcgccgcagactcggaggccgtcacccgtcagaagctggtgaaaggccacgcctactcactgacgggagctgtggaggtgaacttccgtggccggaatgagcggctggtgaggatgaggaacccgtggggtcaggtggagtggaccggagcgtggagcgacggatcgtctgagtggagccaggtgcagggagactgtccacatgccaacgcagaggacggagagttctggatgtccttcagcgacttctgccgtcactataatcgtgttgagttgtgcactctgacccccgacaccatcgaagatgactctgtgaaacactggagcgtcagcaagttcgatggctcctggaggagaggatccaccgctggaggctgcaggaaccacccctacacgttctggatgaatcctcagtttgtgatcaagctggatgaggaggatgatgaccccgatgatggcgaagtgggctgcagctttgtggtcggtctgatccagaagaaccgcagaaagctccggaaacaaggagaggacatgcacaccgttgggtttgccatctatgaggtgagaactgaagacactttaggccagagggaggtgcatctggacaagaactacttcctgacccacgctcagacggcaaagtccgaaaccttcatcaacctgcgtgaggtttgctctcgcttcaagctgcccccgggagagtacctgatcgtcccgtccaccttcgaaccgcatctcaacggagacttctgcatccgtgtgttctctgagaagcagactgagacccagccctgtgacgacccggtccaggctgaactagatgatgagacggtgtctgatgaggacgtggacgcagggttcagaggactcttctcgaaactcgctggagacgacatggagatctcagcggtggagctcaggaccatcatgaacaagatcgtctccaaacgaactgacatcaaaactgacggcttcagcctggagacctgcagggtcatggtcaacctgatggatgacagcgggaacgggaagctcggccttggagagttcgccaccttgtggaagaaggtgcagagatacctgtccatctataagaagaacgactcggacaactcggggacgatgagcacgccggagatgagagtcgcctttaaagacgcaggtttcagcctcaacaacaccatctaccagctgctggtggctcgatactccgacccagacatgaccatcgacttcgacaacttcgtgggctgtctgatgaggctggagatgatgttcaggatcttcaagaagctcgacgctcaggacagcggctccatcgagctcgacttcaaccaggtgagaaccaacaacacgaacttcatcatgttgaatcggaccaggtttcgcctctga
>ENSSAUG00010000077|capn1b
ctgatgagtggaggcatatctgggtggatccagaaggaacggcagaaggctggaggtctgggctcagtccagcaggctgtacgctaccagaaccaggacttccaggccctgaaggaggagtgtctgcagaatgactccttgtttgaggacccaatgttccctgcagaacctacttctctgggtttcaaggagctgggaccgttcaccgccaaaaccagaggggtggagtggaagagaccgatggagctgacagagaatcctcagttcatcgtgggcggggccaccaggacagacatctgtcagggagcgctgggtgactgctggctgctggctgcgattggctctctgactctgaatgagcggctgctgcatcgcgtcgttcctcacggccagacctttaatcgccaatacgccggcatcttccacttccagttctggcagtttggtgagtgggttgacgtggtgatcgacgaccgtctgccggtcaaagatggagagctgctgttcgtccactcagctgaaggcagcgagttctggagcgctctgctggagaaagcctacgccaagctgaacggctcgtacgaggcgttgtccggcggcagcaccactgaaggtttcgaggactttacgggcggtgtgtctgagatgtacgaactgaagaaagctcccagagatctttatcgtatcatcggcaaagctctggagagaggatcactgctgggctgctcgatagacatcaccagtgccttcgacatggaggcggtgaccttcaagaagttggttaaaggccacgcctactctgtgactgcactcagacaggtggagtaccgcggtcggcaggagcgtctgatccgcatcaggaacccctggggtcaggtggagtggaccggcgcctggagtgacaattcctcagagtggagctccatcgactctgcagagaaagacgagctgctctgcaagatggaggacggagagttctggatgtctttccaggagttcctccgtcagttctccaggttggagatctgtaatctgaccccggacgctctcagtgaggactccaccagtttctggaacactacgatgttcgagggcggctggaggagaggaagtaccgccggaggctgcaggaaccatcccaacacattctggatcaaccctcagtataaaatctgcctgctggaggaggatgacgacccggaggatgacgaggcagcctgcagcttcctggtggctctgatgcagaaagatcgccgccgctaccgccgccacggccaggacgtgcacaccatcggcttcgccatctatgagtaccgaggctgtcacggtgtccatatgaagaaggacttcttcctgcgtcactcgtcctgcgctcgctcagagaccttcatcaacctgcgagaggtgagcaccaggctccgcctcccgcccggcgagtacctgattgtcccgtcgaccttcgaacccgccaaggaggccgactttgtcctaagggacatggagatctcagtccgggagctcaggaccatcctcaaccgggtcgtgtctaaacacagagacctgcagactgacggcttcagtctggagtcctgcagagccatggtcagcctcatggacaaagacggcagcgctcgactcggtctggtggagtttcagatcctctggaacaagatcaggaagtggctggggatcttcagagagttcgatctggataaatctggatgtatgagctcgtacgagttgcgtctggcgttggaaaatggcgggttcaaactcaacaacaagttgtatcagatgctggtcgctcgatacgccgacagcgagatcatcgacttcgacaacttcacctgctgtctggtcaaactggaggccatgttcaaggccttccaggagctggaccgagacgggacaggcagtgcagagatcaacatcatcgaggtaccaaacacgaaaccaacttcactcaatcagtaa
>ENSSAUG00010000077|capn1b
gtagaaccggttcttatagttctaaaggaacggcagaaggctggaggtctgggctcagtccagcaggctgtacgctaccagaaccaggacttccaggccctgaaggaggagtgtctgcagaatgactccttgtttgaggacccaatgttccctgcagaacctacttctctgggtttcaaggagctgggaccgttcaccgccaaaaccagaggggtggagtggaagagaccgatggagctgacagagaatcctcagttcatcgtgggcggggccaccaggacagacatctgtcagggagcgctgggtgactgctggctgctggctgcgattggctctctgactctgaatgagcggctgctgcatcgcgtcgttcctcacggccagacctttaatcgccaatacgccggcatcttccacttccagttctggcagtttggtgagtgggttgacgtggtgatcgacgaccgtctgccggtcaaagatggagagctgctgttcgtccactcagctgaaggcagcgagttctggagcgctctgctggagaaagcctacgccaagctgaacggctcgtacgaggcgttgtccggcggcagcaccactgaaggtttcgaggactttacgggcggtgtgtctgagatgtacgaactgaagaaagctcccagagatctttatcgtatcatcggcaaagctctggagagaggatcactgctgggctgctcgatagacatcaccagtgccttcgacatggaggcggtgaccttcaagaagttggttaaaggccacgcctactctgtgactgcactcagacaggtggagtaccgcggtcggcaggagcgtctgatccgcatcaggaacccctggggtcaggtggagtggaccggcgcctggagtgacaattcctcagagtggagctccatcgactctgcagagaaagacgagctgctctgcaagatggaggacggagagttctggatgtctttccaggagttcctccgtcagttctccaggttggagatctgtaatctgaccccggacgctctcagtgaggactccaccagtttctggaacactacgatgttcgagggcggctggaggagaggaagtaccgccggaggctgcaggaaccatcccaacacattctggatcaaccctcagtataaaatctgcctgctggaggaggatgacgacccggaggatgacgaggcagcctgcagcttcctggtggctctgatgcagaaagatcgccgccgctaccgccgccacggccaggacgtgcacaccatcggcttcgccatctatgaggtcagaggctgtcacggtgtccatatgaagaaggacttcttcctgcgtcactcgtcctgcgctcgctcagagaccttcatcaacctgcgagaggtgagcaccaggctccgcctcccgcccggcgagtacctgattgtcccgtcgaccttcgaacccgccaaggaggccgactttgtcctaagggacatggagatctcagtccgggagctcaggaccatcctcaaccgggtcgtgtctaaacacagagacctgcagactgacggcttcagtctggagtcctgcagagccatggtcagcctcatggacgtatcctcactctgctgctgtctgctgtctgctggttctgttggttctgggatcttcagagagttcgatctggataaatctggatgtatgagctcgtacgagttgcgtctggcgttggaaaatggcgggttcaaactcaacaacaagttgtatcagatgctggtcgctcgatacgccgacagcgagatcatcgacttcgacaacttcacctgctgtctggtcaaactggaggccatgttcaaggccttccaggagctggaccgagacgggacaggcagtgcagagatcaacatcatcgaggtaccaaacacgaaaccaacttcactcaatcagtaa
>ENSSAUG00010000467|akt3b
atgagcgaccagaacgtcgtcaaggaaggctgggtccagaaaagaggtgagtacatcaagaactggcgaccgcgctactttctgctgaagacagacggctctttcatcggctacaaggacaaaccgcaggactctgacctggcctacccgctcaacaacttctctgtagcaaaatgtcagctgatgaagaccgagcggcccaaacccaacaccttcatcatccgctgcctgcagtggaccaccgtcatcgagaggacttttcacgtcgacactcctgatgagagggacgaatgggccgaggccatccagatggtcgccgagtctctggccaagcaggaggaggagggcatcctgtgcagccccacctcccagatcgagaacgtgaacgaggaggagatggacacctccatcagccactacaaacgaaagacaatgaatgactttgactatctgaagcttctgggcaaaggcaccttcgggaaagtcattctggtgagggagaaggcgagtggcacctactacgccatgaagatcctgaagaaggaggtcatcatagccaaggatgaagttgctcacacgctcacagaaagtagggtattaaaaaacactcggcatccattcctaacttctctgaagtactcgttccagacgaaggatcggctgtgctttgtaatggagtacgtcaacggaggagagctgtttttccatttgtcaagagaaagagttttttcggaggaccgcactcgtttctacggcgctgagatcgtctctgctttagactacctacattctgccaagatcgtctatcgtgatctgaagctggagaacctcatgttggacaaagacggccacatcaagatcacagacttcggcctctgcaaagaaggcatcaccgacactgccaccatgaagaccttctgtggaacaccagagtacctggctcctgaggtgctggaggacaacgactatgggcgggcggtggactggtggggtttgggcgtggtgacgtacgagatgatgtgcggccgcctgccgttctacaaccaggaccacgagaagctgtttgagctcatcctcatggaggagatcaagttcccacggaccctgtcggcggacgccaagtcgctgctgtcagggctgctgatcaaggaccccaacaaacggctgggcggcggaccggatgacgctaaggagatcatgcgacacagtttctttggcacagtcgactggcaggacgtctacgacaagaagctggtcccgcctttccagccgcaggtctcctcggagacggacacacgctactttgacgaggagttcacagcacagaccatcaccatcactccgccagagaaatatgacgaggacgggatggacgcggcggacaacgagcgaaggcctcatttcccacagttctcctactcagccagcgggcgggagtga
>ENSSAUG00010000467|akt3b
atggaaccagcaacccaacccaaatgtcatcttttcaacacttactactgtccaaatgacgtccttacagggttcaaagtgaaagtttttacattagtctttaatcttcagcttcagtcacagacgtgtgaagatgttttggtcatccaaacttggaatattagcttacttgatgaaggtgagtacatcaagaactggcgaccgcgctactttctgctgaagacagacggctctttcatcggctacaaggacaaaccgcaggactctgacctggcctacccgctcaacaacttctctgtagcaaaatgtcagctgatgaagaccgagcggcccaaacccaacaccttcatcatccgctgcctgcagtggaccaccgtcatcgagaggacttttcacgtcgacactcctgatgagagggacgaatgggccgaggccatccagatggtcgccgagtctctggccaagcaggaggaggagggcatcctgtgcagccccacctcccagatcgagaacgtgaacgaggaggagatggacacctccatcagccactacaaacgaaagacaatgaatgactttgactatctgaagcttctgggcaaaggcaccttcgggaaagtcattctggtgagggagaaggcgagtggcacctactacgccatgaagatcctgaagaaggaggtcatcatagccaaggatgaagttgctcacacgctcacagaaagtagggtattaaaaaacactcggcatccattcctaactctgtttttccatttgtcaagagaaagagttttttcggaggaccgcactcgtttctacggcgctgagatcgtctctgctttagactacctacattctgccaagatcgtctatcgtgatctgaagctggagaacctcatgttggacaaagacggccacatcaagatcacagacttcggcctctgcaaagaaggcatcaccgacactgccaccatgaagaccttctgtggaacaccagagtacctggctcctgaggtgctggaggacaacgactatgggcgggcggtggactggtggggtttgggcgtggtgacgtacgagatgatgtgcggccgcctgccgttctacaaccaggaccacgagaagctgtttgagctcatcctcatggaggagatcaagttcccacggaccctgtcggcggacgccaagtcgctgctgtcagggctgctgatcaaggaccccaacaaacggctgggcggcggaccggatgacgctaaggagatcatgcgacacagtttctttggcacagtcgactggcaggacgtctacgacaagaagctggtcccgcctttccagccgcaggtctcctcggagacggacacacgctactttgacgaggagttcacagcacagaccatcaccatcactccgccagagaaatatgacgaggacgggatggacgcggcggacaacgagcgaaggcctcatttcccacagttctcctactcagccagcgggcgggagtga
>ENSSAUG00010000077|capn1b
cttaaacagtgtagagctgctcacagaactggaccagaaccagctcaactttcacagaactgcagatttactggatccagtgttctgtctctttaacacctccatgttgtgacgatgacgatatggccccgcccgtcccaccgggcggggctcacactgcaacacagcatccacaacagcatccactactgcacacagagccagtaccggcactactgcacacagaaccagtaccagtactactcctcagtactgacagcatcccgactgagacacgaggagcgacacggagcttccagcgagctcattggacggagatcaggatgagtggaggcatatctgggtggatccagaaggaacggcagaaggctggaggtctgggctcagtccagcaggctgtacgctaccagaaccaggacttccaggccctgaaggaggagtgtctgcagaatgactccttgtttgaggacccaatgttccctgcagaacctacttctctgggtttcaaggagctgggaccgttcaccgccaaaaccagaggggtggagtggaagagaccgatggagctgacagagaatcctcagttcatcgtgggcggggccaccaggacagacatctgtcagggagcgctgggtgactgctggctgctggctgcgattggctctctgactctgaatgagcggctgctgcatcgcgtcgttcctcacggccagacctttaatcgccaatacgccggcatcttccacttccagttctggcagtttggtgagtgggttgacgtggtgatcgacgaccgtctgccggtcaaagatggagagctgctgttcgtccactcagctgaaggcagcgagttctggagcgctctgctggagaaagcctacgccaagctgaacggctcgtacgaggcgttgtccggcggcagcaccactgaaggtttcgaggactttacgggcggtgtgtctgagatgtacgaactgaagaaagctcccagagatctttatcgtatcatcggcaaagctctggagagaggatcactgctgggctgctcgatagacatcaccagtgccttcgacatggaggcggtgaccttcaagaagttggttaaaggccacgcctactctgtgactgcactcagacaggtggagtaccgcggtcggcaggagcgtctgatccgcatcaggaacccctggggtcaggtggagtggaccggcgcctggagtgacaattcctcagagtggagctccatcgactctgcagagaaagacgagctgctctgcaagatggaggacggagagttctggatgtctttccaggagttcctccgtcagttctccaggttggagatctgtaatctgaccccggacgctctcagtgaggactccaccagtttctggaacactacgatgttcgagggcggctggaggagaggaagtaccgccggaggctgcaggaaccatcccaacacattctggatcaaccctcagtataaaatctgcctgctggaggaggatgacgacccggaggatgacgaggcagcctgcagcttcctggtggctctgatgcagaaagatcgccgccgctaccgccgccacggccaggacgtgcacaccatcggcttcgccatctatgaggtcagaggtcaaagctgtcacggtgtccatatgaagaaggacttcttcctgcgtcactcgtcctgcgctcgctcagagaccttcatcaacctgcgagaggtgagcaccaggctccgcctcccgcccggcgagtacctgattgtcccgtcgaccttcgaacccgccaaggaggccgactttgtcctaagggtgttcaccgagaaacagtcggagaccgaagacctgcagactgacggcttcagtctggagtcctgcagagccatggtcagcctcatggacgtatcctcactctgctgctgtctgctgtctgggatcttcagagagttcgatctggataaatctggatgtatgagctcgtacgagttgcgtctggcgttggaaaatggcgggttcaaactcaacaacaagttgtatcagatgctggtcgctcgatacgccgacagcgagatcatcgacttcgacaacttcacctgctgtctggtcaaactggaggccatgttcaaggccttccaggagctggaccgagacgggacaggcagtgcagagatcaacatcatcgaggtaccaaacacgaaaccaacttcactcaatcagtaa
>ENSSAUG00010000077|capn1b
cttaaacagtgtagagctgctcacagaactggaccagaaccagctcaactttcacagaactgcagatttactggatccagtgttctgtctctttaacacctccatgttgtgacgatgacgatatggccccgcccgtcccaccgggcggggctcacactgcaacacagcatccacaacagcatccactactgcacacagagccagtaccggcactactgcacacagaaccagtaccagtactactcctcagtactgacagcatcccgactgagacacgaggagcgacacggagcttccagcgagctcattggacggagatcaggatgagtggaggcatatctgggtggatccagaaggaacggcagaaggctggaggtctgggctcagtccagcaggctgtacgctaccagaaccaggacttccaggccctgaaggaggagtgtctgcagaatgactccttgtttgaggacccaatgttccctgcagaacctacttctctgggtttcaaggagctgggaccgttcaccgccaaaaccagaggggtggagtggaagagaccgatggagctgacagagaatcctcagttcatcgtgggcggggccaccaggacagacatctgtcagggagcgctgggtgactgctggctgctggctgcgattggctctctgactctgaatgagcggctgctgcatcgcgtcgttcctcacggccagacctttaatcgccaatacgccggcatcttccacttccagttctggcagtttggtgagtgggttgacgtggtgatcgacgaccgtctgccggtcaaagatggagagctgctgttcgtccactcagctgaaggcagcgagttctggagcgctctgctggagaaagcctacgccaagctgaacggctcgtacgaggcgttgtccggcggcagcaccactgaaggtttcgaggactttacgggcggtgtgtctgagatgtacgaactgaagaaagctcccagagatctttatcgtatcatcggcaaagctctggagagaggatcactgctgggctgctcgatagacatcaccagtgccttcgacatggaggcggtgaccttcaagaagttggttaaaggccacgcctactctgtgactgcactcagacaggtggagtaccgcggtcggcaggagcgtctgatccgcatcaggaacccctggggtcaggtggagtggaccggcgcctggagtgacaattcctcagagtggagctccatcgactctgcagagaaagacgagctgctctgcaagatggaggacggagagttctggatgtctttccaggagttcctccgtcagttctccaggttggagatctgtaatctgaccccggacgctctcagtgaggactccaccagtttctggaacactacgatgttcgagggcggctggaggagaggaagtaccgccggaggctgcaggaaccatcccaacacattctggatcaaccctcagtataaaatctgcctgctggaggaggatgacgacccggaggatgacgaggcagcctgcagcttcctggtggctctgatgcagaaagatcgccgccgctaccgccgccacggccaggacgtgcacaccatcggcttcgccatctatgagtaccgaggctgtcacggtgtccatatgaagaaggacttcttcctgcgtcactcgtcctgcgctcgctcagagaccttcatcaacctgcgagaggtgagcaccaggctccgcctcccgcccggcgagtacctgattgtcccgtcgaccttcgaacccgccaaggaggccgactttgtcctaagggtgttcaccgagaaacaatgtcttcagtttattgatccagtcagaaccaatattatcaatcagtcttctaaactgagtgaaactgtttcctctgcagcgagatggacgatgacgtcgtgcgctcgactcggtctggtggagtttcagatcctctggaacaagatcaggaagtggctggtgaagttcgatctggataaatctggatgtatgagctcgtacgagttgcgtctggcgttggaaaatggcgggttcaaactcaacaacaagttgtatcagatgctggtcgctcgatacgccgacagcgagatcatcgacttcgacaacttcacctgctgtctggtcaaactggaggccatgttcaaggccttccaggagctggaccgagacgggacaggcagtgcagagatcaacatcatcgaggtaccaaacacgaaaccaacttcactcaatcagtaa
>ENSSAUG00010000077|capn1b
atgagatcggtccatcactgtcatgtttctgcaaagacgcggagctcacagtgggtcgtaccggccaatcagagatgggcagagcggtggagtttggttggagctgaaaaggaacggcagaaggctggaggtctgggctcagtccagcaggctgtacgctaccagaaccaggacttccaggccctgaaggaggagtgtctgcagaatgactccttgtttgaggacccaatgttccctgcagaacctacttctctgggtttcaaggagctgggaccgttcaccgccaaaaccagaggggtggagtggaagagaccgatggagctgacagagaatcctcagttcatcgtgggcggggccaccaggacagacatctgtcagggagcgctgggtgactgctggctgctggctgcgattggctctctgactctgaatgagcggctgctgcatcgcgtcgttcctcacggccagacctttaatcgccaatacgccggcatcttccacttccagttctggcagtttggtgagtgggttgacgtggtgatcgacgaccgtctgccggtcaaagatggagagctgctgttcgtccactcagctgaaggcagcgagttctggagcgctctgctggagaaagcctacgccaagctgaacggctcgtacgaggcgttgtccggcggcagcaccactgaaggtttcgaggactttacgggcggtgtgtctgagatgtacgaactgaagaaagctcccagagatctttatcgtatcatcggcaaagctctggagagaggatcactgctgggctgctcgatagacatcaccagtgccttcgacatggaggcggtgaccttcaagaagttggttaaaggccacgcctactctgtgactgcactcagacaggtggagtaccgcggtcggcaggagcgtctgatccgcatcaggaacccctggggtcaggtggagtggaccggcgcctggagtgacaattcctcagagtggagctccatcgactctgcagagaaagacgagctgctctgcaagatggaggacggagagttctggatgtctttccaggagttcctccgtcagttctccaggttggagatctgtaatctgaccccggacgctctcagtgaggactccaccagtttctggaacactacgatgttcgagggcggctggaggagaggaagtaccgccggaggctgcaggaaccatcccaacacattctggatcaaccctcagtataaaatctgcctgctggaggaggatgacgacccggaggatgacgaggcagcctgcagcttcctggtggctctgatgcagaaagatcgccgccgctaccgccgccacggccaggacgtgcacaccatcggcttcgccatctatgaggtcagaggctgtcacggtgtccatatgaagaaggacttcttcctgcgtcactcgtcctgcgctcgctcagagaccttcatcaacctgcgagaggtgagcaccaggctccgcctcccgcccggcgagtacctgattgtcccgtcgaccttcgaacccgccaaggaggccgactttgtcctaagggtgttcaccgagaaacagtcggagaccgatgaaactgtttcctctgacatggagatctcagtccgggagctcaggaccatcctcaaccgggtcgtgtctaaacacagagacctgcagactgacggcttcagtctggagtcctgcagagccatggtcagcctcatggacaaagacggcagcgctcgactcggtctggtggagtttcagatcctctggaacaagatcaggaagtggctggggatcttcagagagttcgatctggataaatctggatgtatgagctcgtacgagttgcgtctggcgttggaaaatggcgggttcaaactcaacaacaagttgtatcagatgctggtcgctcgatacgccgacagcgagatcatcgacttcgacaacttcacctgctgtctggtcaaactggaggccatgttcagtacgtaaccctgacccgacccaaactgaccgcagctctgttagccaaggagccacaaagcatccatgaacaatgtttgaaaagtttctcatctggtttctgtcagaggccttccaggagctggaccgagacgggacaggcagtgcagagatcaacatcatcgagtggctgtatgtga
>ENSSAUG00010000467|akt3b
atggaaccagcaacccaacccaaatgtcatcttttcaacacttactactgtccaaatgacgtccttacagggttcaaagtgaaagtttttacattagtctttaatcttcagcttcagtcacagacgtgtgaagatgttttggtcatccaaacttggaatattagcttacttgatgaaggtgagtacatcaagaactggcgaccgcgctactttctgctgaagacagacggctctttcatcggctacaaggacaaaccgcaggactctgacctggcctacccgctcaacaacttctctgtagcaaaatgtcagctgatgaagaccgagcggcccaaacccaacaccttcatcatccgctgcctgcagtggaccaccgtcatcgagaggacttttcacgtcgacactcctgatgagagggacgaatgggccgaggccatccagatggtcgccgagtctctggccaagcaggaggaggagggcatcctgtgcagccccacctcccagatcgagaacgtgaacgaggaggagatggacacctccatcagccactacaaacgaaagacaatgaatgactttgactatctgaagcttctgggcaaaggcaccttcgggaaagtcattctggtgagggagaaggcgagtggcacctactacgccatgaagatcctgaagaaggaggtcatcatagccaaggatgaagttgctcacacgctcacagaaagtagggtattaaaaaacactcggcatccattcctaacttctctgaagtactcgttccagacgaaggatcggctgtgctttgtaatggagtacgtcaacggaggagagctgtttttccatttgtcaagagaaagagttttttcggaggaccgcactcgtttctacggcgctgagatcgtctctgctttagactacctacattctgccaagatcgtctatcgtgatctgaagctggagaacctcatgttggacaaagacggccacatcaagatcacagacttcggcctctgcaaagaaggcatcaccgacactgccaccatgaagaccttctgtggaacaccagagtacctggctcctgaggtgctggaggacaacgactatgggcgggcggtggactggtggggtttgggcgtggtgacgtacgagatgatgtgcggccgcctgccgttctacaaccaggaccacgagaagctgtttgagctcatcctcatggaggagatcaagttcccacggaccctgtcggcggacgccaagtcgctgctgtcagggctgctgatcaaggaccccaacaaacggctgggcggcggaccggatgacgctaaggagatcatgcgacacagtttctttggcacagtcgactggcaggacgtctacgacaagaagctggtcccgcctttccagccgcaggtctcctcggagacggacacacgctactttgacgaggagttcacagcacagaccatcaccatcactccgccagagaaatatgacgaggacgggatggacgcggcggacaacgagcgaaggcctcatttcccacagttctcctactcagccagcgggcgggagtga
>ENSSAUG00010000077|capn1b
atgagatcggtccatcactgtcatgtttctgcaaagacgcggagctcacagtgggtcgtaccggccaatcagagatgggcagagcggtggagtttggttggagctgaaaaggaacggcagaaggctggaggtctgggctcagtccagcaggctgtacgctaccagaaccaggacttccaggccctgaaggaggagtgtctgcagaatgactccttgtttgaggacccaatgttccctgcagaacctacttctctgggtttcaaggagctgggaccgttcaccgccaaaaccagaggggtggagtggaagagaccgatggagctgacagagaatcctcagttcatcgtgggcggggccaccaggacagacatctgtcagggagcgctgggtgactgctggctgctggctgcgattggctctctgactctgaatgagcggctgctgcatcgcgtcgttcctcacggccagacctttaatcgccaatacgccggcatcttccacttccagttctggcagtttggtgagtgggttgacgtggtgatcgacgaccgtctgccggtcaaagatggagagctgctgttcgtccactcagctgaaggcagcgagttctggagcgctctgctggagaaagcctacgccaagctgaacggctcgtacgaggcgttgtccggcggcagcaccactgaaggtttcgaggactttacgggcggtgtgtctgagatgtacgaactgaagaaagctcccagagatctttatcgtatcatcggcaaagctctggagagaggatcactgctgggctgctcgatagacatcaccagtgccttcgacatggaggcggtgaccttcaagaagttggttaaaggccacgcctactctgtgactgcactcagacaggtggagtaccgcggtcggcaggagcgtctgatccgcatcaggaacccctggggtcaggtggagtggaccggcgcctggagtgacaattcctcagagtggagctccatcgactctgcagagaaagacgagctgctctgcaagatggaggacggagagttctggatgtctttccaggagttcctccgtcagttctccaggttggagatctgtaatctgaccccggacgctctcagtgaggactccaccagtttctggaacactacgatgttcgagggcggctggaggagaggaagtaccgccggaggctgcaggaaccatcccaacacattctggatcaaccctcagtataaaatctgcctgctggaggaggatgacgacccggaggatgacgaggcagcctgcagcttcctggtggctctgatgcagaaagatcgccgccgctaccgccgccacggccaggacgtgcacaccatcggcttcgccatctatgaggtcagaggctgtcacggtgtccatatgaagaaggacttcttcctgcgtcactcgtcctgcgctcgctcagagaccttcatcaacctgcgagaggtgagcaccaggctccgcctcccgcccggcgagtacctgattgtcccgtcgaccttcgaacccgccaaggaggccgactttgtcctaagggacatggagatctcagtccgggagctcaggaccatcctcaaccgggtcgtgtctaaacacagagacctgcagactgacggcttcagtctggagtcctgcagagccatggtcagcctcatggacgtatcctcactctgctgctgtctgctgtctgggatcttcagagagttcgatctggataaatctggatgtatgagctcgtacgagttgcgtctggcgttggaaaatggcgggttcaaactcaacaacaagttgtatcagatgctggtcgctcgatacgccgacagcgagatcatcgacttcgacaacttcacctgctgtctggtcaaactggaggccatgttcacaacattggattggatcaccccgatccagatacacagttttcaagattaccagagctctaaaccagccgactggatggcataa
>ENSSAUG00010000077|capn1b
ttcagccctggaggcatatctgggtggatccagaaggaacggcagaaggctggaggtctgggctcagtccagcaggctgtacgctaccagaaccaggacttccaggccctgaaggaggagtgtctgcagaatgactccttgtttgaggacccaatgttccctgcagaacctacttctctgggtttcaaggagctgggaccgttcaccgccaaaaccagaggggtggagtggaagagaccgatggagctgacagagaatcctcagttcatcgtgggcggggccaccaggacagacatctgtcagggagcgctgggtgactgctggctgctggctgcgattggctctctgactctgaatgagcggctgctgcatcgcgtcgttcctcacggccagacctttaatcgccaatacgccggcatcttccacttccagttctggcagtttggtgagtgggttgacgtggtgatcgacgaccgtctgccggtcaaagatggagagctgctgttcgtccactcagctgaaggcagcgagttctggagcgctctgctggagaaagcctacgccaagctgaacggctcgtacgaggcgttgtccggcggcagcaccactgaaggtttcgaggactttacgggcggtgtgtctgagatgtacgaactgaagaaagctcccagagatctttatcgtatcatcggcaaagctctggagagaggatcactgctgggctgctcgatagacatcaccagtgccttcgacatggaggcggtgaccttcaagaagttggttaaaggccacgcctactctgtgactgcactcagacaggtggagtaccgcggtcggcaggagcgtctgatccgcatcaggaacccctggggtcaggtggagtggaccggcgcctggagtgacaattcctcagagtggagctccatcgactctgcagagaaagacgagctgctctgcaagatggaggacggagagttctggatgtctttccaggagttcctccgtcagttctccaggttggagatctgtaatctgaccccggacgctctcagtgaggactccaccagtttctggaacactacgatgttcgagggcggctggaggagaggaagtaccgccggaggctgcaggaaccatcccaacacattctggatcaaccctcagtataaaatctgcctgctggaggaggatgacgacccggaggatgacgaggcagcctgcagcttcctggtggctctgatgcagaaagatcgccgccgctaccgccgccacggccaggacgtgcacaccatcggcttcgccatctatgaggtcagaggtcaaagctgtcacggtgtccatatgaagaaggacttcttcctgcgtcactcgtcctgcgctcgctcagagaccttcatcaacctgcgagaggtgagcaccaggctccgcctcccgcccggcgagtacctgattgtcccgtcgaccttcgaacccgccaaggaggccgactttgtcctaagggtgttcaccgagaaacagtcggagaccgagaccatcctcaaccgggtcgtgtctaaacacagagacctgcagactgacggcttcagtctggagtcctgcagagccatggtcagcctcatggacaaagacggcagcgctcgactcggtctggtggagtttcagatcctctggaacaagatcaggaagtggctggggatcttcagagagttcgatctggataaatctggatgtatgagctcgtacgagttgcgtctggcgttggaaaatggcgggttcaaactcaacaacaagttgtatcagatgctggtcgctcgatacgccgacagcgagatcatcgacttcgacaacttcacctgctgtctggtcaaactggaggccatgttcaaggccttccaggagctggaccgagacgggacaggcagtgcagagatcaacatcatcgagattcttttgtcccagtgtgtgtttaagccctga
>ENSSAUG00010000077|capn1b
gacttcagccatctgagcatatctgggtggatccagaaggaacggcagaaggctggaggtctgggctcagtccagcaggctgtacgctaccagaaccaggacttccaggccctgaaggaggagtgtctgcagaatgactccttgtttgaggacccaatgttccctgcagaacctacttctctgggtttcaaggagctgggaccgttcaccgccaaaaccagaggggtggagtggaagagaccgatggagctgacagagaatcctcagttcatcgtgggcggggccaccaggacagacatctgtcagggagcgctgggtgactgctggctgctggctgcgattggctctctgactctgaatgagcggctgctgcatcgcgtcgttcctcacggccagacctttaatcgccaatacgccggcatcttccacttccagttctggcagtttggtgagtgggttgacgtggtgatcgacgaccgtctgccggtcaaagatggagagctgctgttcgtccactcagctgaaggcagcgagttctggagcgctctgctggagaaagcctacgccaagctgaacggctcgtacgaggcgttgtccggcggcagcaccactgaaggtttcgaggactttacgggcggtgtgtctgagatgtacgaactgaagaaagctcccagagatctttatcgtatcatcggcaaagctctggagagaggatcactgctgggctgctcgatagacatcaccagtgccttcgacatggaggcggtgaccttcaagaagttggttaaaggccacgcctactctgtgactgcactcagacaggtggagtaccgcggtcggcaggagcgtctgatccgcatcaggaacccctggggtcaggtggagtggaccggcgcctggagtgacaattcctcagagtggagctccatcgactctgcagagaaagacgagctgctctgcaagatggaggacggagagttctggatgtctttccaggagttcctccgtcagttctccaggttggagatctgtaatctgaccccggacgctctcagtgaggactccaccagtttctggaacactacgatgttcgagggcggctggaggagaggaagtaccgccggaggctgcaggaaccatcccaacacattctggatcaaccctcagtataaaatctgcctgctggaggaggatgacgacccggaggatgacgaggcagcctgcagcttcctggtggctctgatgcagaaagatcgccgccgctaccgccgccacggccaggacgtgcacaccatcggcttcgccatctatgagtaccgaggctgtcacggtgtccatatgaagaaggacttcttcctgcgtcactcgtcctgcgctcgctcagagaccttcatcaacctgcgagaggtgagcaccaggctccgcctcccgcccggcgagtacctgattgtcccgtcgaccttcgaacccgccaaggaggccgactttgtcctaagggtgttcaccgagaaacagtcggagaccgatgaaactgacatggagatctcagtccgggagctcaggaccatcctcaaccgggtcgtgtctaaacacagagacctgcagactgacggcttcagtctggagtcctgcagagccatggtcagcctcatggacaaagacggcagcgctcgactcggtctggtggagtttcagatcctctggaacaagatcaggaagtggctggggatcttcagagagttcgatctggataaatctggatgtatgagctcgtacgagttgcgtctggcgttggaaaatggcgggttcaaactcaacaacaagttgtatcagatgctggtcgctcgatacgccgacagcgagatcatcgacttcgacaacttcacctgctgtctggtcaaactggaggccatgttcaaggccttccaggagctggaccgagacgggacaggcagtgcagagatcaacatcatcgaggtaccaaacacgaaaccaacttcactcaatcagtaa
>ENSSAUG00010000077|capn1b
atgatgagtggaggcatatctgggtggatccagaaggaacggcagaaggctggaggtctgggctcagtccagcaggctgtacgctaccagaaccaggacttccaggccctgaaggaggagtgtctgcagaatgactccttgtttgaggacccaatgttccctgcagaacctacttctctgggtttcaaggagctgggaccgttcaccgccaaaaccagaggggtggagtggaagagaccgatggagctgacagagaatcctcagttcatcgtgggcggggccaccaggacagacatctgtcagggagcgctgggtgactgctggctgctggctgcgattggctctctgactctgaatgagcggctgctgcatcgcgtcgttcctcacggccagacctttaatcgccaatacgccggcatcttccacttccagttctggcagtttggtgagtgggttgacgtggtgatcgacgaccgtctgccggtcaaagatggagagctgctgttcgtccactcagctgaaggcagcgagttctggagcgctctgctggagaaagcctacgccaagctgaacggctcgtacgaggcgttgtccggcggcagcaccactgaaggtttcgaggactttacgggcggtgtgtctgagatgtacgaactgaagaaagctcccagagatctttatcgtatcatcggcaaagctctggagagaggatcactgctgggctgctcgatagacatcaccagtgccttcgacatggaggcggtgaccttcaagaagttggttaaaggccacgcctactctgtgactgcactcagacaggtggagtaccgcggtcggcaggagcgtctgatccgcatcaggaacccctggggtcaggtggagtggaccggcgcctggagtgacaattcctcagagtggagctccatcgactctgcagagaaagacgagctgctctgcaagatggaggacggagagttctggatgtctttccaggagttcctccgtcagttctccaggttggagatctgtaatctgaccccggacgctctcagtgaggactccaccagtttctggaacactacgatgttcgagggcggctggaggagaggaagtaccgccggaggctgcaggaaccatcccaacacattctggatcaaccctcagtataaaatctgcctgctggaggaggatgacgacccggaggatgacgaggcagcctgcagcttcctggtggctctgatgcagaaagatcgccgccgctaccgccgccacggccaggacgtgcacaccatcggcttcgccatctatgaggtcagaggctgtcacggtgtccatatgaagaaggacttcttcctgcgtcactcgtcctgcgctcgctcagagaccttcatcaacctgcgagaggtgagcaccaggctccgcctcccgcccggcgagtacctgattgtcccgtcgaccttcgaacccgccaaggaggccgactttgtcctaagggtgttcaccgagaaacagtcggagaccgagaccatcctcaaccgggtcgtgtctaaacacagagacctgcagactgacggcttcagtctggagtcctgcagagccatggtcagcctcatggacaaagacggcagcgctcgactcggtctggtggagtttcagatcctctggaacaagatcaggaagtggctggggatcttcagagagttcgatctggataaatctggatgtatgagctcgtacgagttgcgtctggcgttggaaaatggcgggttcaaactcaacaacaagttgtatcagatgctggtcgctcgatacgccgacagcgagatcatcgacttcgacaacttcacctgctgtctggtcaaactggaggccatgttcaaggccttccaggagctggaccgagacgggacaggcagtgcagagatcaacatcatcgaggtaccaaacacgaaaccaacttcactcaatcagtaa
>ENSSAUG00010002070|akt2l
agagagtccatggtgttttcctgggtggatggcctgcactggatctagcctgtcaaaactgcagtggaactagagcaacgagggataaagtcggaataatgggctgttcagatctagataactgtgactgagacttgaagggcttgcagagaagtccacagttcccctacctgacctcttgttcctgacactctttgaaacacatctcttaccatgaatgaagttaatatagtcagagaaggttggctgcataaaagaggtgaatatatcaaaacatggaggcccaggtatttcatcctgaagagtgatggttccttcattggttataaggagaaacctgatctaaatgaccagactttaccaccactcaacaatttctcagtggcagaatgccagttaatgaagactgaaagaccccggcccaacacatttgtcatacgttgtctacagtggaccactgtcattgaacgtacttttcatgtggacagtaatgaggagaggctcgtaccacaatatggtgaaaatgttttaagcgattccccaagaacccatcatcatcccccaattctgccaacgatgagtgactttgagtacctgaagctgcttgggaaggggacgtttgggaaggttattctggtcaaagagaaatccatgggagtccattatgccatgaaaatactgcgcaaagaggtcattatagccaaggatgaggtggcccacacagtaacagagagcagagtgttacaaaacacacgacaccccttcctcacgacactgaaatatgccttccaaacccacgatcgactctgttttgtcatggaatacgccaacggaggcgagcttttcttccacctttcacgcgaacgagtgttcacagaagaccgggcacgcttctacggtgcagagattgtgtcagcacttgagtacctccattcacgtgatgttgtttaccgtgatctgaagctggagaatctgatgctggacaaagacggccacatcaaaatcactgattttggtctttgtaaagagggcattacccctgatgctaccatgaaaaccttctgtggaactcctgaatatctggcacctgaggtcctagaagataatgactatggcagggcagtggattggtggggtctgggtgtcgtcatgtatgagatgatgtgtggccgtctgcctttctacaaccaagaccatgagcgtttgtttgaactcatcctcatggaggagatccgtttccccaggaacctgtcacccgaagccaagtctctgctggcaggtcttctcaagaaggaccccaaacagaggttaggtggaggtcccgatgatgccaaagaagtaatgactcacaaatttttcatcaccataaactggcaggatgtggtacagaagaagctcaccccactcttcagaccacaagtgacatcagagacagacacccggtactttgatgaggagttcacagcgcagaccatcacactcactcctccagacaagtataacagtctggactgcgaggactccagccagcaagcacatttcccccaattttcttactctgccagcataagagagtga
>ENSSAUG00010000603|rptor
caaatattctgatttcaaaatcagcttttacccagacatgtttgcaaaagttacaacagaaacacaattctgaagttgcttttgactaaaattaggctctaagggtaaatgttttcttttcagaataaagtacatctgacatattagcgaagagtgacataaaacatcagcagacacaatatgccggataaaatacatgtatttagttttctgtagaccccgtgtgtgtgtgtttatattttggtgtgtgacaggaacagaagcggtgacgtttcatgacagcctcgccgccccaacagtgcattctgggtccaacccaagatggctgcgcccttgcagaagtgctgaagaagtgcctctccggagaagtattcgggattgtgtgtgtttcccgcgaaaaccaaagcaccaaatcagctaccagggtcgctggtttgtagaggaacaccatacgaccccagtaatcgataagtgtggccggtgcttcgtgtggctgtggcagactgtccgtgtgaagatgggcctcgtctccagccccttcccatagcgaagagccgtggggagaggagccgcagattcccctgcaaacacgcacccgtccaacttggatttgacgggtttgacatactatacaggctgtggacgctgccctacaattttttgaccaggattatttgtgcgaccgtatctgtcatcgtccgcagacggagaggttcctcagcccgggttgataatcccaccgcaccaagggccctgatgaaaatggactcagacttgcttcattcgccggccgtgggcctcacagaggaagaggaggccgacatgaatgactggaaacttccgctggccttcatgaagaaacgacattcggagaagattgagggttccaaggccctagcgcagagctggaggatgaaggacaggatgaagactgtgagtgtagcactggtgttgtgtctcaacgtgggagtggacccccctgatgttgtcaagacgtccccctgcgccagactagagtgctggatagatcctctgtcgatgagtccacagaaagccttggagactatcggggctaacctgcagaagcaatatgaaaactggcaacccagggcgcgatacaagcaaagtctggaccccacagtggacgaggtgaagaagctgtgcacgtcgctgagacgtaacgccaaagaggagcgagtcctcttccactacaacggtcacggggtgcctcggcccaccgtcaacggagagatctgggtctttaataagaactacacccagtacatcccgctgtccatctacgacctgcagacgtggatggggagcccttccatttttgtctatgactgctccaatgcgggcatcattgtcaagtcatttaaacagttcgccctgcagagagagcaggagctggaggtggcagccatcaatcccagccacccgctcgcccagatgcctctgccgccctcaatgaagaactgcatccagctggctgcctgcgaggccagcgagctgctgcccatgaaccccgacctccctgctgacctcttcacttcctgcctcaccacgcccatcaagatcgccctccgatggttttgtatgcagaagagtgccaagttggtgcctggggtgacgttagacctcatcgagaagatccctggcaggctcaatgacagacgcactcccctaggagagctcaactggatcttcacagccatcaccgacaccatcgcctggaatgtgctgcctagagatctgttccagaagttgtttcgtcaggacctgctggtggccagcttgttccgcaatttcctgttagcagagaggataatgaggtcgtacaactgcacgccggtcagcagtcctcgtctgccccctacatacatgcacgccatgtggcaagcatgggaccttgccgtggacatctgcctctctcagctgcctaccatcattgaggagggcaccgccttcagacacagtcctttctttgcggagcagctcacggcatttcaggtgtggctgacgatgggcgtggagaacaggaaccctcctgagcagctgccgattgtactacaggtcctcctcagtcaggtgcatcggctgcgggctctagatctgctggggcgcttcctggatctgggtccgtgggccgtcagcctggcgctgtctgtggggatcttcccctacgtgttaaagctgctacagagttcagccagagagctgcggccactgttggtgttcatctgggctaaaatccttgctgtggacagttcatgtcaagctgacctggtgaaagacaacggtcataagtacttcctttctgtgctggctgacagttacatgccagctgagcatcgaaccatggctgtgtttatattggctgtcatcgtcaacagctacaacacaggacaggaggcctgtctgcagggcaacctaatagccaactgcctggagcagctgtcagacccccaccctttgctccgccagtgggtggccatttgcctgggccgcatctggcagaacttcgacccagcgcgctggtgtggagttcgggacagcgcccacgagaagctctacactctgttgtctgatccaattcccgaggtgaggtgtgcggctgtttttgctctcgggacatttgtggggaactctgctgagaggacggaccactccaccaccatcgaccacaacgtggccatgatgctggcccagctcatcaatgatggcagccctgtggtccgcaaggagctggtcgtagcactgagtcacctggtggtccagtatgagagcaacttttgtacagttgccctccagtttatagaagaggagaagaactacacagtgccgtcaccagccaacaccgcagagcccggtaacctgactccagtgagggacagccctgccatcccacgcctgcgatcagtcaactcctacaccaacatccgagctgccaccactgcccgcaacctgaacaagagcctgcagaacctcaacctcaatgaagagggtggaccagccgctttctctcctggtaacctgagcaccagcagcagcgccagcagcaccctggggagcccagacaacgacgagtacatcctctctttcgagaccattgacaaaatgcgacgggtgtcctcctattcttccctcaactcactcataggtgtgtccttcaacagtgtttacactcagatctggagggtgctgctacatcttgctgctgaccctttccctgaagtgtcggacctggccatgaaggtcctcaacagcattgcgtataaggcaacaatgaacgctcggcctcagaggatcctggactctggatctctcacccagtcagccccagccagccccaccagcaagggcacgcacatccaccaggctggtggctctcctcccatgccgagcaccagcagctccagtctgaccaacgaggtgcccaagccccccaccagagagcagacgtccacacggcctccttacacccctacattaggaggacaggcaccccactcccaccagttcccccgcactcgcaagatgtttgacaagggacctgagcaggcaggtgaggatggtgatgagccaggtggtcacaggaactacatctgtcccgcccttcaaacaggcctttgtgattggagtgcaaagtattttgctcagcctgtcatgaagatcccagaggagcatgacctggagagtcaggtgaggatggagcggcagtggaggttcctgagaaacacgcgcgtgagaaggcagagccgaggcatcactcaaagaggtgtctcccgtctggatgatcaaatattcatcaaccgaaaccctggagtaccgtctgttgtgaagttccaccccttcaacacctgcatcgctgtggccgacaaagacagcatctgtttctgggactgggagaaaggcgagagactggactacttctataacggaaaccctcgttacacgcgcatcacagccatggagtacctgaacggacacgactgttcattactgctcaccgcaacagacgacggggcgttgcgtatctggaagaactttgccgaccagaagaacccagagatggtgacggcatggcagggcctttccgacatgctgcccactaccagaggtcagccctcctccagcgctcacagtctggccagaagggtctccatctatcttgacaggagtaagcaaggaggtgcaggtatggtggtcgactgggagcaggagacgggcctcctcatgacgtctggagatgtacgagtcatcaggatctgggacactgacagagagatgaaggtccaggacatcccgacaggagcggacagctgtgtgaccagcctgtcctgcgactcccagcgctcgctcatcgttgccggcctgggtgacggatctgtgcgtgtattcgacaggaggatgggtccaaatgaatgccgggtgatgacctacagggagcatggtgcctgggtagtcaaagctcatctacagaaggagacagacggacacatcatcagcgtcagtgttaacggagatgttcgtttctttgaaccacggactccggactccatcaacgtgctgcagacggtgaaggggttgacagccctggacatccacccgcaggccaacctgtttgcctgtggatcaatgaaccagttcatagccgtctacaatgctaacggcgatgtgatcagcaacataaagtactatgacggcttcatgggacaaaggattggggccatcagctgtttagccttccatccgtactggccccacttggcggtaggcagcaacgactactacatgtcaatctattcagcggagaagaggctcagataacacaccagcattcatcaccccccctccccccaaccaaaccaccacatatgacttctgaccctgagcctcgagctctgggatgtaaatgatgtttttgttgtacatatgcaattaccaccctgaatgttctagtgatggctgctgacaaaaactcatgctacgaacgacgatatatatatatattattattattattattattattctcattgtttattcatattcttattatgaagctaatgattgtagacttggctgtgctgaggagtgtgtatatttaaatagcgtatacagaagaatagaggttctattttaaagaagtggtacccacccatcactggggctcctcctcgtgactcagcgagcatcactacctgaatggactgtgactccagtgaacctagaagtggcaagacgagggggggggtcgcccggaggacaacagacaccgttgaaacacagacaacacgggctcaccctccgatggaccccgttgtgtttatgaattaattttaatggccgtcttgcagccgaaggacagagtttcgctacttggctgcgacgctagcaagacgtgtggagggatggacccagatggactggcgtgcgtgcgttaaaatggattatagcacagatgtgccccacactgggccttcatagtcttggacgtgatacccaaaaacgatgcctgctaccatgctagaactctccttcttccttcatccttcccccagcgtcctaaacataatcatatatttttcatgcaggcccctttgttgtggctcagagggctgtttctgttttttaacttatctcctgtaaaaagggaaaacctctattgccccttggatgatacacactcttgtatctagcacagtgagaggagggctggattggtcctgcagtacccgcctacctgccctgcaaagcaataaaagcctcccatgattca
>ENSSAUG00010000603|rptor
atggactcagacttgcttcattcgccggccgtgggcctcacagaggaagaggaggccgacatgaatgactggaaacttccgctggccttcatgaagaaacgacattcggagaagattgagggttccaaggccctagcgcagagctggaggatgaaggacagggcgcgatacaagcaaagtctggaccccacagtggacgaggtgaagaagctgtgcacgtcgctgagacgtaacgccaaagaggagcgagtcctcttccactacaacggtcacggggtgcctcggcccaccgtcaacggagagatctgggtctttaataagaactacacccagtacatcccgctgtccatctacgacctgcagacgtggatggggagcccttccatttttgtctatgactgctccaatgcgggcatcattgtcaagtcatttaaacagttcgccctgcagagagagcaggagctggaggtggcagccatcaatcccagccacccgctcgcccagatgcctctgccgccctcaatgaagaactgcatccagctggctgcctgcgaggccagcgagctgctgcccatgaaccccgacctccctgctgacctcttcacttcctgcctcaccacgcccatcaagatcgccctccgatggttttgtatgcagaagagtgccaagttggtgcctggggtgacgttagacctcatcgagaagatccctggcaggctcaatgacagacgcactcccctaggagagctcaactggatcttcacagccatcaccgacaccatcgcctggaatgtgctgcctagagatctgttccagaagttgtttcgtcaggacctgctggtggccagcttgttccgcaatttcctgttagcagagaggataatgaggtcgtacaactgcacgccggtcagcagtcctcgtctgccccctacatacatgcacgccatgtggcaagcatgggaccttgccgtggacatctgcctctctcagctgcctaccatcattgaggagggcaccgccttcagacacagtcctttctttgcggagcagctcacggcatttcaggtgtggctgacgatgggcgtggagaacaggaaccctcctgagcagctgccgattgtactacaggtcctcctcagtcaggtgcatcggctgcgggctctagatctgctggggcgcttcctggatctgggtccgtgggccgtcagcctggcgctgtctgtggggatcttcccctacgtgttaaagctgctacagagttcagccagagagctgcggccactgttggtgttcatctgggctaaaatccttgctgtggacagttcatgtcaagctgacctggtgaaagacaacggtcataagtacttcctttctgtgctggctgacagttacatgccagctgagcatcgaaccatggctgtgtttatattggctgtcatcgtcaacagctacaacacaggacaggaggcctgtctgcagggcaacctaatagccaactgcctggagcagctgtcagacccccaccctttgctccgccagtgggtggccatttgcctgggccgcatctggcagaacttcgacccagcgcgctggtgtggagttcgggacagcgcccacgagaagctctacactctgttgtctgatccaattcccgaggtgaggtgtgcggctgtttttgctctcgggacatttgtggggaactctgctgagaggacggaccactccaccaccatcgaccacaacgtggccatgatgctggcccagctcatcaatgatggcagccctgtggtccgcaaggagctggtcgtagcactgagtcacctggtggtccagtatgagagcaacttttgtacagttgccctccagtttatagaagaggagaagaactacacagtgccgtcaccagccaacaccgcagagcccggtaacctgactccagtgagggacagccctgccatcccacgcctgcgatcagtcaactcctacaccaacatccgagctgccaccactgcccgcaacctgaacaagagcctgcagaacctcaacctcaatgaagagggtggaccagccgctttctctcctggtaacctgagcaccagcagcagcgccagcagcaccctggggagcccagacaacgacgagtacatcctctctttcgagaccattgacaaaatgcgacgggtgtcctcctattcttccctcaactcactcataggtgtgtccttcaacagtgtttacactcagatctggagggtgctgctacatcttgctgctgaccctttccctgaagtgtcggacctggccatgaaggtcctcaacagcattgcgtataaggcaacaatgaacgctcggcctcagaggatcctggactctggatctctcacccagtcagccccagccagccccaccagcaagggcacgcacatccaccaggctggtggctctcctcccatgccgagcaccagcagctccagtctgaccaacgaggtgcccaagccccccaccagagagcagacgtccacacggcctccttacacccctacattaggaggacaggcaccccactcccaccagttcccccgcactcgcaagatgtttgacaagggacctgagcaggcaggtgaggatggtgatgagccaggtggtcacaggaactacatctgtcccgcccttcaaacaggcctttgtgattggagtgcaaagtattttgctcagcctgtcatgaagatcccagaggagcatgacctggagagtcaggtgaggatggagcggcagtggaggttcctgagaaacacgcgcgtgagaaggcagagccgaggcatcactcaaagaggtgtctcccgtctggatgatcaaatattcatcaaccgaaaccctggagtaccgtctgttgtgaagttccaccccttcaacacctgcatcgctgtggccgacaaagacagcatctgtttctgggactgggagaaaggcgagagactggactacttctataacggaaaccctcgttacacgcgcatcacagccatggagtacctgaacggacacgactgttcattactgctcaccgcaacagacgacggggcgttgcgtatctggaagaactttgccgaccagaagaacccagagatggtgacggcatggcagggcctttccgacatgctgcccactaccagaggtctggccagaagggtctccatctatcttgacaggagtaagcaaggaggtgcaggtatggtggtcgactgggagcaggagacgggcctcctcatgacgtctggagatgtacgagtcatcaggatctgggacactgacagagagatgaaggtccaggacatcccgacaggagcggacagctgtgtgaccagcctgtcctgcgactcccagcgctcgctcatcgttgccggcctgggtgacggatctgtgcgtgtattcgacaggaggatgggtccaaatgaatgccgggtgatgacctacagggagcatggtgcctgggtagtcaaagctcatctacagaaggagacagacggacacatcatcagcgtcagtgttaacggagatgttcgtttctttgaaccacggactccggactccatcaacgtgctgcagacggtgaaggggttgacagccctggacatccacccgcaggccaacctgtttgcctgtggatcaatgaaccagttcatagccgtctacaatgctaacggcgatgtgatcagcaacataaagtactatgacggcttcatgggacaaaggattggggccatcagctgtttagccttccatccgtactggccccacttggcggtaggcagcaacgactactacatgtcaatctattcagcggagaagaggctcagataacacaccagcattcatcaccccccctccccccaaccaaaccaccacatatgacttctgaccctgagcctcgagctctgggatgtaaatgatgtttttgttgtacatatgcaattaccaccctgaatgttctagtgatggctgctgacaaaaactcatgctacgaacgacgatatatatatatattattattattattattattattctcattgtttattcatattcttattatgaagctaatgattgtagacttggctgtgctgaggagtgtgtatatttaaatagcgtatacagaagaatagaggttctattttaaagaagtggtacccacccatcactggggctcctcctcgtgactcagcgagcatcactacctgaatggactgtgactccagtgaacctagaagtggcaagacgagggggggggtcgcccggaggacaacagacaccgttgaaacacagacaacacgggctcaccctccgatggaccccgttgtgtttatgaattaattttaatggccgtcttgcagccgaaggacagagtttcgctacttggctgcgacgctagcaagacgtgtggagggatggacccagatggactggcgtgcgtgcgttaaaatggattatagcacagatgtgccccacactgggccttcatagtcttggacgtgatacccaaaaacgatgcctgctaccatgctagaactctccttcttccttcatccttcccccagcgtcctaaacataatcatatatttttcatgcaggcccctttgttgtggctcagagggctgtttctgttttttaacttatctcctgtaaaaagggaaaacctctattgccccttggatgatacacactcttgtatctagcacagtgagaggagggctggattggtcctgcagtacccgcctacctgccctgcaaagcaataaaagcctcccatgattca
>ENSSAUG00010001919|cdh15
tctctgcctctctgtctcgctctgagtgacagcacatgtgctggggtacatgggagggccgctgctgaaattctaacccccttaccccacgactgtgagacataccccagccatggacagggaggagccgtgagagacaaacgctgggagaggaaaggaagcaaagagagggagagagactgcaagtgcaagaggacagagagaaagaaaggagagtaagggacaggtttcagggtcgagccactcaggagcccagttcttagtggagcagcgtcagatctttgagtcatcagaggtctgttcattcttctgagtttctgagtgcaggtacaaaggatggcggcaaggatgttgatggtgtgtgtgctgggtactctgctttgtcagatgtggagctccgcagaacctcatcacaatgaagaagagctgcccctgcagacccttaacccatggagaaatcaaggcaagggagtggtgagggtgaagagggactggatcatccctccgataagagtgctggagaatagcaagcaagttccggaagaccttgtccagatcaaatcggacaaaatctttacaggtgaggtgatctacaagttagagggaccgggggtggaccaggagcccaagaacctctttgagattgatgataaaaccggagttatcaggagcaagcggccgctggacagagagaaatacgacaccttcacgctgaaagcctttgcgctgtcccccagtggagagagactggagaatcctaccaccatagagatagtggtcctggatcagaatgacaacagacctgccttcacccagagccagtttgttggctctgtctctgagttctcagtcccaggcacgtcagtgatgtcagtgtcagccactgatgcagatgacccaaagacagaaaacgcttatctgagctactctatcattggccaggagagcatccctgccagcgctgttaccaagacaatgttcggtatcaacaaccagacgggagccatctacacaagagacgtaggcctggatcgagaggtggtgaaaagtttccgattaaagctgcagattgccgatatggggggcatgggactgacaagtgaaggcgtggcaatcatacatgtgtccgacatcaacaaccacgccccacagttcagccccgcctcgtacagtatgatagcagtggagaacaggaaggactatgagatcggccgggtgaatgtgacggacagagacgatcatggaacaaggaactgggaggccaaatacttcattaccaatgaccctgatggcctcttcgccatcagtactgatcccgccaccaaccagggcgttctgacagtggtgaagcctttagattttgaagcgcaggatgagtacacgctgattctgatggtggaaaatgtcagtcctctgagcaacaaggcgcccaacctcccagtgagcaccgctacagtcgctgtgactgttgtgaacgagaacgaggctccacatttcagagaggaccccataaagattgttgtccctgagtctgtggatcctgggactctactgacaaacaacatcgcttttgaccctgataattctgacctgaggtatgagtttagcagagatcccgagagttggctggacattgacagggatacgggagacattagcgccaggagagcctttaacatgcgatccccacatgtcaagaacaatatctacattgctgtcgtcaaggttacagatgctgatggtatgtcgtccactgcctccgtggtcatcacactgaaggagaccaatgacttcccccctcagctcctccctctgagtggctctgtatgtaagggcgcaggccggaagcgttctggtctggtcgtgaccgctgtggatgaagatcttcctccgcaagctgcacccttcacctttgcaatgcactatgacatgtcactgaactggactgttattcaagtcaacgacactcacgctgtgcttcagcccctcgtggagctggaggcgggagattacatggtcacggtgatggtgtcagactccggcagtccagttatgagttcctatgctcaggtcaatatcaccgtgtgtctctgcgactcctttggagattgtaagtctgtaacaggggctatcctcggctccagtgtgggaatcagcttcatctttctcatcatcatcatggccagtgttgcactcctgctgttgctgctcctcctggctgtggcggtgaccacctgcaggagacgccaccatatcaagaaaggaacaggtctgcttgtcggggaatcggaagacgacatacgtgacaatgtcttcaactacgatgagcaaggagggggtgaggaggacgagaacgcctttaacgtcgacctgctgtggaatccccacgatgcaccttcgaccccgggctcctactacccagggtaccctggtgttcctcgtggcaagcagcccctcaggaaagatgccccgcataacctgccctcacctatctacccacgaaggcctcctgcagaccccactgacatcgaggactacatcaatgatggcctggaggctgcagacaatgatcctaacgtgcctccatacgacacagctctgatctatgactatgagggagagggctcactggcaggcagcctcagctccatcgcttcaggcagctctgacggagaccaagactacgactacctcaatgactggggaccacgctttcagaaactggccaacatgtacgacccacgttaagatggactgcagcccagaggaaaaagaccggtgtgaaacaccaccagttagggacacagatgatgcctcaggtttacagaaaagattttagtccgggatacacatttgaggtgtaccaaggaaaaataaacgggccttcaatctaatgtgcctgggtttt
>ENSSAUG00010002070|akt2l
agagagtccatggtgttttcctgggtggatggcctgcactggatctagcctgtcaaaactgcagtggaactagagcaacgagggataaagtcggaataatgggctgttcagatctagataactgtgactgagacttgaagggcttgcagagaagtccacagttcccctacctgacctcttgttcctgacactctttgaaacacatctcttaccatgaatgaagttaatatagtcagagaaggttggctgcataaaagaggtgaatatatcaaaacatggaggcccaggtatttcatcctgaagagtgatggttccttcattggttataaggagaaacctgatctaaatgaccagactttaccaccactcaacaatttctcagtggcagaatgccagttaatgaagactgaaagaccccggcccaacacatttgtcatacgttgtctacagtggaccactgtcattgaacgtacttttcatgtggacagtaatgaggagaggctcgaagagccaatggatgtgttcggctcacccagccaatgcagcttggaggagatggaagtggctatgtctaagagcggcaccaaagtgacgatgagtgactttgagtacctgaagctgcttgggaaggggacgtttgggaaggttattctggtcaaagagaaatccatgggagtccattatgccatgaaaatactgcgcaaagaggtcattatagccaaggatgaggtggcccacacagtaacagagagcagagtgttacaaaacacacgacaccccttcctcacgacactgaaatatgccttccaaacccacgatcgactctgttttgtcatggaatacgccaacggaggcgagcttttcttccacctttcacgcgaacgagtgttcacagaagaccgggcacgcttctacggtgcagagattgtgtcagcacttgagtacctccattcacgtgatgttgtttaccgtgatctgaagctggagaatctgatgctggacaaagacggccacatcaaaatcactgattttggtctttgtaaagagggcattacccctgatgctaccatgaaaaccttctgtggaactcctgaatatctggcacctgaggtcctagaagataatgactatggcagggcagtggattggtggggtctgggtgtcgtcatgtatgagatgatgtgtggccgtctgcctttctacaaccaagaccatgagcgtttgtttgaactcatcctcatggaggagatccgtttccccaggaacctgtcacccgaagccaagtctctgctggcaggtcttctcaagaaggaccccaaacagaggttaggtggaggtcccgatgatgccaaagaagtaatgactcacaaatttttcatcaccataaactggcaggatgtggtacagaagaagctcaccccactcttcagaccacaagtgacatcagagacagacacccggtactttgatgaggagttcacagcgcagaccatcacactcactcctccagacaatctggactgcgaggactccagccagcaagcacatttcccccaattttcttactctgccagcataagagagtga
>ENSSAUG00010002070|akt2l
agagagtccatggtgttttcctgggtggatggcctgcactggatctagcctgtcaaaactgcagtggaactagagcaacgagggataaagtcggaataatgggctgttcagatctagataactgtgactgagacttgaagggcttgcagagaagtccacagttcccctacctgacctcttgttcctgacactctttgaaacacatctcttaccatgaatgaagttaatatagtcagagaaggttggctgcataaaagaggtgaatatatcaaaacatggaggcccaggtatttcatcctgaagagtgatggttccttcattggttataaggagaaacctgatctaaatgaccagactttaccaccactcaacaatttctcagtggcagaatgccagttaatgaagactgaaagaccccggcccaacacatttgtcatacgttgtctacagtggaccactgtcattgaacgtacttttcatgtggacagtaatgaggagagagaggagtggatgtgggcaatccagtctgtggcaaatagtttaaagatgcgggaacaggaggaggaagagccaatggatgtgttcggctcacccagccaatgcagcttggaggagatggaagtggctatgtctaagagcggcaccaaagtgacgatgagtgactttgagtacctgaagctgcttgggaaggggacgtttgggaaggttattctggtcaaagagaaatccatgggagtccattatgccatgaaaatactgcgcaaagaggtcattatagccaaggatgaggtggcccacacagtaacagagagcagagtgttacaaaacacacgacaccccttcctcacgacactgaaatatgccttccaaacccacgatcgactctgttttgtcatggaatacgccaacggaggcgagcttttcttccacctttcacgcgaacgagtgttcacagaagaccgggcacgcttctacggtgcagagattgtgtcagcacttgagtacctccattcacgtgatgttgtttaccgtgatctgaagctggagaatctgatgctggacaaagacggccacatcaaaatcactgattttggtctttgtaaagagggcattacccctgatgctaccatgaaaaccttctgtggaactcctgaatatctggcacctgaggtcctagaagataatgactatggcagggcagtggattggtggggtctgggtgtcgtcatgtatgagatgatgtgtggccgtctgcctttctacaaccaagaccatgagcgtttgtttgaactcatcctcatggaggagatccgtttccccaggaacctgtcacccgaagccaagtctctgctggcaggtcttctcaagaaggaccccaaacagaggttaggtggaggtcccgatgatgccaaagaagtaatgactcacaaatttttcatcaccataaactggcaggatgtggtacagaagaagctcaccccactcttcagaccacaagtgacatcagagacagacacccggtactttgatgaggagttcacagcgcagaccatcacactcactcctccagacaagtataacagtctggactgcgaggactccagccagcaagcacatttcccccaattttcttactctgccagcataagagagtga
>ENSSAUG00010000467|akt3b
caaacttttggcaaggtaatcaaagtttgttttctcctccctgcaggtgagtacatcaagaactggcgaccgcgctactttctgctgaagacagacggctctttcatcggctacaaggacaaaccgcaggactctgacctggcctacccgctcaacaacttctctgtagcaaaatgtcagctgatgaagaccgagcggcccaaacccaacaccttcatcatccgctgcctgcagtggaccaccgtcatcgagaggacttttcacgtcgacactcctgatgagagggacgaatgggccgaggccatccagatggtcgccgagtctctggccaagcaggaggaggagggcatcctgtgcagccccacctcccagatcgagaacgtgaacgaggaggagatggacacctccatcagccactacaaacgaaagacaatgaatgactttgactatctgaagcttctgggcaaaggcaccttcgggaaagtcattctggtgagggagaaggcgagtggcacctactacgccatgaagatcctgaagaaggaggtcatcatagccaaggatgaagttgctcacacgctcacagaaagtagggtattaaaaaacactcggcatccattcctaacttctctgaagtactcgttccagacgaaggatcggctgtgctttgtaatggagtacgtcaacggaggagagctgtttttccatttgtcaagagaaagagttttttcggaggaccgcactcgtttctacggcgctgagatcgtctctgctttagactacctacattctgccaagatcgtctatcgtgatctgaagctggagaacctcatgttggacaaagacggccacatcaagatcacagacttcggcctctgcaaagaaggcatcaccgacactgccaccatgaagaccttctgtggaacaccagagtacctggctcctgaggtgctggaggacaacgactatgggcgggcggtggactggtggggtttgggcgtggtgacgtacgagatgatgtgcggccgcctgccgttctacaaccaggaccacgagaagctgtttgagctcatcctcatggaggagatcaagttcccacggaccctgtcggcggacgccaagtcgctgctgtcagggctgctgatcaaggaccccaacaaacggctgggcggcggaccggatgacgctaaggagatcatgcgacacagtttctttggcacagtcgactggcaggacgtctacgacaagaagctggtcccgcctttccagccgcaggtctcctcggagacggacacacgctactttgacgaggagttcacagcacagaccatcaccatcactccgccagagaaatatgacgaggacgggatggacgcggcggacaacgagcgaaggcctcatttcccacagttctcctactcagccagcgggcgggagtga
>ENSSAUG00010000467|akt3b
atggaaccagcaacccaacccaaatgtcatcttttcaacacttactactgtccaaatgacgtccttacagggttcaaagtgaaagtttttacattagtctttaatcttcagcttcagtcacagacgtgtgaagatgttttggtcatccaaacttggaatattagcttacttgatgaaggtgagtacatcaagaactggcgaccgcgctactttctgctgaagacagacggctctttcatcggctacaaggacaaaccgcaggactctgacctggcctacccgctcaacaacttctctgtagcaaaatgtcagctgatgaagaccgagcggcccaaacccaacaccttcatcatccgctgcctgcagtggaccaccgtcatcgagaggacttttcacgtcgacactcctgatgagagggacgaatgggccgaggccatccagatggtcgccgagtctctggccaagcaggaggaggagggcatcctgtgcagccccacctcccagatcgagaacgtgaacgaggaggagatggacacctccatcagccactacaaacgaaagacaatgaatgactttgactatctgaagcttctgggcaaaggcaccttcgggaaagtcattctggtgagggagaaggcgagtggcacctactacgccatgaagatcctgaagaaggaggtcatcatagccaaggatgaagttgctcacacgctcacagaaagtagggtattaaaaaacactcggcatccattcctaacttctctgaagtactcgttccagacgaaggatcggctgtgctttgtaatggagtacgtcaacggaggagagctgtttttccatttgtcaagagaaagagttttttcggaggaccgcactcgtttctacggcgctgagatcgtctctgctttagactacctacattctgccaagatcgtctatcgtgatctgaagctggagaacctcatgttggacaaagacggccacatcaagatcacagacttcggcctctgcaaagaaggcatcaccgacactgccaccatgaagaccttctgtggaacaccagagtacctggctcctgaggtgctggaggacaacgactatgggcgggcggtggactggtggggtttgggcgtggtgacgtacgagatgatgtgcggccgcctgccgttctacaaccaggaccacgagaagctgtttgagctcatcctcatggaggagatcaagttcccacggaccctgtcggcggacgccaagtcgctgctgtcagggctgctgatcaaggaccccaacaaacggctgggcggcggaccggatgacgctaaggagatcatgcgacacagtttctttggcacagtcgactggcaggacgtctacgacaagaagctggtcccgcctttccagccgcaggtctcctcggagacggacacacgctactttgacgaggagttcacagcacagaccatcaccatcactccgccagagaaatgtaaggacgaatcgatttatactttgatattttaa
>ENSSAUG00010000603|rptor
caaatattctgatttcaaaatcagcttttacccagacatgtttgcaaaagttacaacagaaacacaattctgaagttgcttttgactaaaattaggctctaagggtaaatgttttcttttcagaataaagtacatctgacatattagcgaagagtgacataaaacatcagcagacacaatatgccggataaaatacatgtatttagttttctgtagaccccgtgtgtgtgtgtttatattttggtgtgtgacaggaacagaagcggtgacgtttcatgacagcctcgccgccccaacagtgcattctgggtccaacccaagatggctgcgcccttgcagaagtgctgaagaagtgcctctccggagaagtattcgggattgtgtgtgtttcccgcgaaaaccaaagcaccaaatcagctaccagggtcgctggtttgtagaggaacaccatacgaccccagtaatcgataagtgtggccggtgcttcgtgtggctgtggcagactgtccgtgtgaagatgggcctcgtctccagccccttcccatagcgaagagccgtggggagaggagccgcagattcccctgcaaacacgcacccgtccaacttggatttgacgggtttgacatactatacaggctgtggacgctgccctacaattttttgaccaggattatttgtgcgaccgtatctgtcatcgtccgcagacggagaggttcctcagcccgggttgataatcccaccgcaccaagggccctgatgaaaatggactcagacttgcttcattcgccggccgtgggcctcacagaggaagaggaggccgacatgaatgactggaaacttccgctggccttcatgaagaaacgacattcggagaagattgagggttccaaggccctagcgcagagctggaggatgaaggacaggatgaagactgtgagtgtagcactggtgttgtgtctcaacgtgggagtggacccccctgatgttgtcaagacgtccccctgcgccagactagagtgctggatagatcctctgtcgatgagtccacagaaagccttggagactatcggggctaacctgcagaagcaatatgaaaactggcaacccagggcgcgatacaagcaaagtctggaccccacagtggacgaggtgaagaagctgtgcacgtcgctgagacgtaacgccaaagaggagcgagtcctcttccactacaacggtcacggggtgcctcggcccaccgtcaacggagagatctgggtctttaataagaactacacccagtacatcccgctgtccatctacgacctgcagacgtggatggggagcccttccatttttgtctatgactgctccaatgcgggcatcattgtcaagtcatttaaacagttcgccctgcagagagagcaggagctggaggtggcagccatcaatcccagccacccgctcgcccagatgcctctgccgccctcaatgaagaactgcatccagctggctgcctgcgaggccagcgagctgctgcccatgaaccccgacctccctgctgacctcttcacttcctgcctcaccacgcccatcaagatcgccctccgatggttttgtatgcagaagagtgccaagttggtgcctggggtgacgttagacctcatcgagaagatccctggcaggctcaatgacagacgcactcccctaggagagctcaactggatcttcacagccatcaccgacaccatcgcctggaatgtgctgcctagagatctgttccagaagttgtttcgtcaggacctgctggtggccagcttgttccgcaatttcctgttagcagagaggataatgaggtcgtacaactgcacgccggtcagcagtcctcgtctgccccctacatacatgcacgccatgtggcaagcatgggaccttgccgtggacatctgcctctctcagctgcctaccatcattgaggagggcaccgccttcagacacagtcctttctttgcggagcagctcacggcatttcaggtgtggctgacgatgggcgtggagaacaggaaccctcctgagcagctgccgattgtactacaggtcctcctcagtcaggtgcatcggctgcgggctctagatctgctggggcgcttcctggatctgggtccgtgggccgtcagcctggcgctgtctgtggggatcttcccctacgtgttaaagctgctacagagttcagccagagagctgcggccactgttggtgttcatctgggctaaaatccttgctgtggacagttcatgtcaagctgacctggtgaaagacaacggtcataagtacttcctttctgtgctggctgacagttacatgccagctgagcatcgaaccatggctgtgtttatattggctgtcatcgtcaacagctacaacacaggacaggaggcctgtctgcagggcaacctaatagccaactgcctggagcagctgtcagacccccaccctttgctccgccagtgggtggccatttgcctgggccgcatctggcagaacttcgacccagcgcgctggtgtggagttcgggacagcgcccacgagaagctctacactctgttgtctgatccaattcccgaggtgaggtgtgcggctgtttttgctctcgggacatttgtggggaactctgctgagaggacggaccactccaccaccatcgaccacaacgtggccatgatgctggcccagctcatcaatgatggcagccctgtggtccgcaaggagctggtcgtagcactgagtcacctggtggtccagtatgagagcaacttttgtacagttgccctccagtttatagaagaggagaagaactacacagtgccgtcaccagccaacaccgcagagcccggtaacctgactccagtgagggacagccctgccatcccacgcctgcgatcagtcaactcctacaccaacatccgagctgccaccactgcccgcaacctgaacaagagcctgcagaacctcaacctcaatgaagagggtggaccagccgctttctctcctggtaacctgagcaccagcagcagcgccagcagcaccctggggagcccagacaacgacgagtacatcctctctttcgagaccattgacaaaatgcgacgggtgtcctcctattcttccctcaactcactcataggtgtgtccttcaacagtgtttacactcagatctggagggtgctgctacatcttgctgctgaccctttccctgaagtgtcggacctggccatgaaggtcctcaacagcattgcgtataaggcaacaatgaacgctcggcctcagaggatcctggactctggatctctcacccagtcagccccagccagccccaccagcaagggcacgcacatccaccaggctggtggctctcctcccatgccgagcaccagcagctccagtctgaccaacgaggtgcccaagccccccaccagagagcagacgtccacacggcctccttacacccctacattaggaggacaggcaccccactcccaccagttcccccgcactcgcaagatgtttgacaagggacctgagcaggcaggtgaggatggtgatgagccaggtggtcacaggaactacatctgtcccgcccttcaaacaggcctttgtgattggagtgcaaagtattttgctcagcctgtcatgaagatcccagaggagcatgacctggagagtcaggtgaggatggagcggcagtggaggttcctgagaaacacgcgcgtgagaaggcagagccgaggcatcactcaaagaggtgtctcccgtctggatgatcaaatattcatcaaccgaaaccctggagtaccgtctgttgtgaagttccaccccttcaacacctgcatcgctgtggccgacaaagacagcatctgtttctgggactgggagaaaggcgagagactggactacttctataacggaaaccctcgttacacgcgcatcacagccatggagtacctgaacggacacgactgttcattactgctcaccgcaacagacgacggggcgttgcgtatctggaagaactttgccgaccagaagaacccagagatggtgacggcatggcagggcctttccgacatgctgcccactaccagaggtcagccctcctccagcgctcacagtgcaggtatggtggtcgactgggagcaggagacgggcctcctcatgacgtctggagatgtacgagtcatcaggatctgggacactgacagagagatgaaggtccaggacatcccgacaggagcggacagctgtgtgaccagcctgtcctgcgactcccagcgctcgctcatcgttgccggcctgggtgacggatctgtgcgtgtattcgacaggaggatgggtccaaatgaatgccgggtgatgacctacagggagcatggtgcctgggtagtcaaagctcatctacagaaggagacagacggacacatcatcagcgtcagtgttaacggagatgttcgtttctttgaaccacggactccggactccatcaacgtgctgcagacggtgaaggggttgacagccctggacatccacccgcaggccaacctgtttgcctgtggatcaatgaaccagttcatagccgtctacaatgctaacggcgatgtgatcagcaacataaagtactatgacggcttcatgggacaaaggattggggccatcagctgtttagccttccatccgtactggccccacttggcggtaggcagcaacgactactacatgtcaatctattcagcggagaagaggctcagataacacaccagcattcatcaccccccctccccccaaccaaaccaccacatatgacttctgaccctgagcctcgagctctgggatgtaaatgatgtttttgttgtacatatgcaattaccaccctgaatgttctagtgatggctgctgacaaaaactcatgctacgaacgacgatatatatatatattattattattattattattattctcattgtttattcatattcttattatgaagctaatgattgtagacttggctgtgctgaggagtgtgtatatttaaatagcgtatacagaagaatagaggttctattttaaagaagtggtacccacccatcactggggctcctcctcgtgactcagcgagcatcactacctgaatggactgtgactccagtgaacctagaagtggcaagacgagggggggggtcgcccggaggacaacagacaccgttgaaacacagacaacacgggctcaccctccgatggaccccgttgtgtttatgaattaattttaatggccgtcttgcagccgaaggacagagtttcgctacttggctgcgacgctagcaagacgtgtggagggatggacccagatggactggcgtgcgtgcgttaaaatggattatagcacagatgtgccccacactgggccttcatagtcttggacgtgatacccaaaaacgatgcctgctaccatgctagaactctccttcttccttcatccttcccccagcgtcctaaacataatcatatatttttcatgcaggcccctttgttgtggctcagagggctgtttctgttttttaacttatctcctgtaaaaagggaaaacctctattgccccttggatgatacacactcttgtatctagcacagtgagaggagggctggattggtcctgcagtacccgcctacctgccctgcaaagcaataaaagcctcccatgattca
>ENSSAUG00010002070|akt2l
agagagtccatggtgttttcctgggtggatggcctgcactggatctagcctgtcaaaactgcagtggaactagagcaacgagggataaagtcggaataatgggctgttcagatctagataactgtgactgagacttgaagggcttgcagagaagtccacagttcccctacctgacctcttgttcctgacactctttgaaacacatctcttaccatgaatgaagttaatatagtcagagaaggttggctgcataaaagaggtgaatatatcaaaacatggaggcccaggtatttcatcctgaagagtgatggttccttcattggttataaggagaaacctgatctaaatgaccagactttaccaccactcaacaatttctcagtggcagaatgccagttaatgaagactgaaagaccccggcccaacacatttgtcatacgttgtctacagtggaccactgtcattgaacgtacttttcatgtggacagtaatgaggagaggctcgtaccacaatatggtgaaaatgttttaagcgattccccaaggccttcagtggctagtgaggagcatgaaacgtcgctgtcaagctgtcattgcggcaaatgtgactttgagtacctgaagctgcttgggaaggggacgtttgggaaggttattctggtcaaagagaaatccatgggagtccattatgccatgaaaatactgcgcaaagaggtcattatagccaaggatgaggtggcccacacagtaacagagagcagagtgttacaaaacacacgacaccccttcctcacgacactgaaatatgccttccaaacccacgatcgactctgttttgtcatggaatacgccaacggaggcgagcttttcttccacctttcacgcgaacgagtgttcacagaagaccgggcacgcttctacggtgcagagattgtgtcagcacttgagtacctccattcacgtgatgttgtttaccgtgatctgaagctggagaatctgatgctggacaaagacggccacatcaaaatcactgattttggtctttgtaaagagggcattacccctgatgctaccatgaaaaccttctgtggaactcctgaatatctggcacctgaggtcctagaagataatgactatggcagggcagtggattggtggggtctgggtgtcgtcatgtatgagatgatgtgtggccgtctgcctttctacaaccaagaccatgagcgtttgtttgaactcatcctcatggaggagatccgtttccccaggaacctgtcacccgaagccaagtctctgctggcaggtcttctcaagaaggaccccaaacagaggttaggtggaggtcccgatgatgccaaagaagtaatgactcacaaatttttcatcaccataaactggcaggatgtggtacagaagaagctcaccccactcttcagaccacaagtgacatcagagacagacacccggtactttgatgaggagttcacagcgcagaccatcacactcactcctccagacaagtataacagtctggactgcgaggactccagccagcaagcacatttcccccaattttcttactctgccagcataagagagtga
>ENSSAUG00010000467|akt3b
atggaaccagcaacccaacccaaatgtcatcttttcaacacttactactgtccaaatgacgtccttacagggttcaaagtgaaagtttttacattagtctttaatcttcagcttcagtcacagacgtgtgaagatgttttggtcatccaaacttggaatattagcttacttgatgaaggtgagtacatcaagaactggcgaccgcgctactttctgctgaagacagacggctctttcatcggctacaaggacaaaccgcaggactctgacctggcctacccgctcaacaacttctctgtagcaaaatgtcagctgatgaagaccgagcggcccaaacccaacaccttcatcatccgctgcctgcagtggaccaccgtcatcgagaggacttttcacgtcgacactcctgatgagagggacgaatgggccgaggccatccagatggtcgccgagtctctggccaagcaggaggaggagggcatcctgtgcagccccacctcccagatcgagaacgtgaacgaggaggagatggacacctccatcagccactacaaacgaaagacaatgaatgactttgactatctgaagcttctgggcaaaggcaccttcgggaaagtcattctggtgagggagaaggcgagtggcacctactacgccatgaagatcctgaagaaggaggtcatcatagccaaggatgaagttgctcacacgctcacagaaagtagggtattaaaaaacactcggcatccattcctaacttctctgaagtactcgttccagacgaaggatcggctgtgctttgtaatggagtacgtcaacggaggagagctgtttttccatttgtcaagagaaagagttttttcggaggaccgcactcgtttctacggcgctgagatcgtctctgctttagactacctacattctgccaagatcgtctatcgtgatctgaagctggagaacctcatgttggacaaagacggccacatcaagatcacagacttcggcctctgcaaagaaggcatcaccgacactgccaccatgaagaccttctgtggaacaccagagtacctggctcctgaggtgctggaggacaacgactatgggcgggcggtggactggtggggtttgggcgtggtgacgtacgagatgatgtgcggccgcctgccgttctacaaccaggaccacgagaagctgtttgagctcatcctcatggaggagatcaagttcccacggaccctgtcggcggacgccaagtcgctgctgtcagggctgctgatcaaggaccccaacaaacggctgggcggcggaccggatgacgctaaggagatcatgcgacacagtttctttggcacagtcgactggcaggacgtctacgacaagaagctggtcccgcctttccagccgcaggtctcctcggagacggacacacgctactttgacgaggacaaaaataccaaagtagatcatttccactgcagaatataa
>ENSSAUG00010000603|rptor
atgaaaatggactcagacttgcttcattcgccggccgtgggcctcacagaggaagaggaggccgacatgaatgactggaaacttccgctggccttcatgaagaaacgacattcggagaagattgagggttccaaggccctagcgcagagctggaggatgaaggacagggttaaggatgctccttgtgctgagttactctgtgttttctgggcagatcctctgtcgatgagtccacagaaagccttggagactatcggggctaacctgcagaagcaatatgaaaactggcaacccagggcgcgatacaagcaaagtctggaccccacagtggacgaggtgaagaagctgtgcacgtcgctgagacgtaacgccaaagaggagcgagtcctcttccactacaacggtcacggggtgcctcggcccaccgtcaacggagagatctgggtctttaataaggtggcagccatcaatcccagccacccgctcgcccagatgcctctgccgccctcaatgaagaactgcatccagctggctgcctgcgaggccagcgagctgctgcccatgaaccccgacctccctgctgacctcttcacttcctgcctcaccacgcccatcaagatcgccctccgatggttttgtatgcagaagagtgccaagttggtgcctggggtgacgttagacctcatcgagaagatccctggcaggctcaatgacagacgcactcccctaggagagctcaactggatcttcacagccatcaccgacaccatcgcctggaatgtgctgcctagagatctgttccagaagttgtttcgtcaggacctgctggtggccagcttgttccgcaatttcctgttagcagagaggataatgaggtcgtacaactgcacgccggtcagcagtcctcgtctgccccctacatacatgcacgccatgtggcaagcatgggaccttgccgtggacatctgcctctctcagctgcctaccatcattgaggagggcaccgccttcagacacagtcctttctttgcggagcagctcacggcatttcaggtgtggctgacgatgggcgtggagaacaggaaccctcctgagcagctgccgattgtactacaggtcctcctcagtcaggtgcatcggctgcgggctctagatctgctggggcgcttcctggatctgggtccgtgggccgtcagcctggcgctgtctgtggggatcttcccctacgtgttaaagctgctacagagttcagccagagagctgcggccactgttggtgttcatctgggctaaaatccttgctgtggacagttcatgtcaagctgacctggtgaaagacaacggtcataagtacttcctttctgtgctggctgacagttacatgccagctgagcatcgaaccatggctgtgtttatattggctgtcatcgtcaacagctacaacacaggacaggaggcctgtctgcagggcaacctaatagccaactgcctggagcagctgtcagacccccaccctttgctccgccagtgggtggccatttgcctgggccgcatctggcagaacttcgacccagcgcgctggtgtggagttcgggacagcgcccacgagaagctctacactctgttgtctgatccaattcccgaggtgaggtgtgcggctgtttttgctctcgggacatttgtggggaactctgctgagaggacggaccactccaccaccatcgaccacaacgtggccatgatgctggcccagctcatcaatgatggcagccctgtggtccgcaaggagctggtcgtagcactgagtcacctggtggtccagtatgagagcaacttttgtacagttgccctccagtttatagaagaggagaagaactacacagtgccgtcaccagccaacaccgcagagcccggtaacctgactccagtgagggacagccctgccatcccacgcctgcgatcagtcaactcctacaccaacatccgagctgccaccactgcccgcaacctgaacaagagcctgcagaacctcaacctcaatgaagagggtggaccagccgctttctctcctggtaacctgagcaccagcagcagcgccagcagcaccctggggagcccagacaacgacgagtacatcctctctttcgagaccattgacaaaatgcgacgggtgtcctcctattcttccctcaactcactcataggtgtgtccttcaacagtgtttacactcagatctggagggtgctgctacatcttgctgctgaccctttccctgaagtgtcggacctggccatgaaggtcctcaacagcattgcgtataaggcaacaatgaacgctcggcctcagaggatcctggactctggatctctcacccagtcagccccagccagccccaccagcaagggcacgcacatccaccaggtgggcacctcatctccatctggctctcctcccatgccgagcaccagcagctccagtctgaccaacgaggtgcccaagccccccaccagagagcagacgtccacacggcctccttacacccctacattaggaggacaggcaccccactcccaccagttcccccgcactcgcaagatgtttgacaagggacctgagcaggcaggtgaggatggtgatgagccaggtggtcacaggaactacatctgtcccgcccttcaaacaggcctttgtgattggagtgcaaagtattttgctcagcctgtcatgaagatcccagaggagcatgacctggagagtcaggtgaggatggagcggcagtggaggttcctgagaaacacgcgcgtgagaaggcagagccgaggcatcactcaaagaggtgtctcccgtctggatgatcaaatattcatcaaccgaaaccctggagtaccgtctgttgtgaagttccaccccttcaacacctgcatcgctgtggccgacaaagacagcatctgtttctgggactgggagaaaggcgagagactggactacttctataacggaaaccctcgttacacgcgcatcacagccatggagtacctgaacggacacgactgttcattactgctcaccgcaacagacgacggggcgttgcgtatctggaagaactttgccgaccagaagaacccagagatggtgacggcatggcagggcctttccgacatgctgcccactaccagaggtctggccagaagggtctccatctatcttgacaggagtaagcaaggaggtgcaggtatggtggtcgactgggagcaggagacgggcctcctcatgacgtctggagatgtacgagtcatcaggatctgggacactgacagagagatgaaggtccaggacatcccgacaggagcggacagctgtgtgaccagcctgtcctgcgactcccagcgctcgctcatcgttgccggcctgggtgacggatctgtgcgtgtattcgacaggaggatgggtccaaatgaatgccgggtgatgacctacagggagcatggtgcctgggtagtcaaagctcatctacagaaggagacagacggacacatcatcagcgtcagtgttaacggagatgttcgtttctttgaaccacggactccggactccatcaacgtgctgcagacggtgaaggggttgacagccctggacatccacccgcaggccaacctgtttgcctgtggatcaatgaaccagttcatagccgtctacaatgctaacggcgatgtgatcagcaacataaagtactatgacggcttcatgggacaaaggattggggccatcagctgtttagccttccatccgtactggccccacttggcggtaggcagcaacgactactacatgtcaatctattcagcggagaagaggctcagataacacaccagcattcatcaccccccctccccccaaccaaaccaccacatatgacttctgaccctgagcctcgagctctgggatgtaaatgatgtttttgttgtacatatgcaattaccaccctgaatgttctagtgatggctgctgacaaaaactcatgctacgaacgacgatatatatatatattattattattattattattattctcattgtttattcatattcttattatgaagctaatgattgtagacttggctgtgctgaggagtgtgtatatttaaatagcgtatacagaagaatagaggttctattttaaagaagtggtacccacccatcactggggctcctcctcgtgactcagcgagcatcactacctgaatggactgtgactccagtgaacctagaagtggcaagacgagggggggggtcgcccggaggacaacagacaccgttgaaacacagacaacacgggctcaccctccgatggaccccgttgtgtttatgaattaattttaatggccgtcttgcagccgaaggacagagtttcgctacttggctgcgacgctagcaagacgtgtggagggatggacccagatggactggcgtgcgtgcgttaaaatggattatagcacagatgtgccccacactgggccttcatagtcttggacgtgatacccaaaaacgatgcctgctaccatgctagaactctccttcttccttcatccttcccccagcgtcctaaacataatcatatatttttcatgcaggcccctttgttgtggctcagagggctgtttctgttttttaacttatctcctgtaaaaagggaaaacctctattgccccttggatgatacacactcttgtatctagcacagtgagaggagggctggattggtcctgcagtacccgcctacctgccctgcaaagcaataaaagcctcccatgattca
>ENSSAUG00010001470|IGFBP4
atggtgcgtggaggcggcgtggcacaagctccgtcctgctggggcttttgggtgttcggcgccctgtcgctggtggcgctgtgcatgtcagaccaagctatccgctgtcctgtgtgcaccgaggagaggctggcaagctgccgtctgccggaaggctgcgaggagacggtgcgggagcccggctgcggttgctgccctacctgtgccctgcctaaaggggctcactgcggcgtctactcgccccgatgtggcacgggcctccgctgcttcccgccgcgtggcgtggagagaccgctgcactcactgatgcacggccagggggtgtgcaccgatgagagagaggtggaggagaactcagcaatggaccggcaggatgagatcgtccctgagcacccaaacaacagcaatatcaggtgcagtccacaggacaagcgctgcatacagaagaccctggcacgacaccctcctaaatccacaaaccagagaagcaacaccgccagggaggagaccaaggcggtgctggctccatgtcgtgctgagctacagcgagcgttggatagattggcatcaaacacccgcacacatgatgatctcttcacaatccccatacccaactgtgacaggaacggagatttccacgctaaacagtgtcatccagcacgtgacggccagcgggggaagtgctggtgcgtggatcagaaaaccggcatgaggctgccagggccgctggagctacgaggggatctggactgccaccagttaatgactgctactctgagggattgaggagtgaggtgtggcagtggaggtgcaggaccagctgaactctactggtgcttattagtagaactacatgaggaaaggactttgctctaaagcctcgcttcacctgaggccaacagtacttgagcttgtgcaacaaaaaggaaaccattgaattgagttcttttgcaatttcgtttctgtgtgtgagagtctgagtttttgagcacttgttttttgtttttactatgtgaacttaagactggttgtagttatgaactttctaagagtgcaaaacgtgttgttttctctagtctaacttgagtagagtaagaaagtaagaaaatgcatctgccccaccagataatcagacctgagatacaacagcagctgtagcatctgtttatttctttctgcagcactagttggaattactgcatcatgacaatgcagaaagattatcagttaaaggactgtgtactaatttttcacactatgtttgtaattggttgtaacgtgtggctgttattctactgttctatatgttgttaaatacccacccatctagtaagtaggatacaaacaaaccat
>ENSSAUG00010000467|akt3b
atggaaccagcaacccaacccaaatgtcatcttttcaacacttactactgtccaaatgacgtccttacagggttcaaagtgaaagtttttacattagtctttaatcttcagcttcagtcacagacgtgtgaagatgttttggtcatccaaacttggaatattagcttacttgatgaaggtgagtacatcaagaactggcgaccgcgctactttctgctgaagacagacggctctttcatcggctacaaggacaaaccgcaggactctgacctggcctacccgctcaacaacttctctgtagcaaaatgtcagctgatgaagaccgagcggcccaaacccaacaccttcatcatccgctgcctgcagtggaccaccgtcatcgagaggacttttcacgtcgacactcctgatgagagggacgaatgggccgaggccatccagatggtcgccgagtctctggccaagcaggaggaggagggcatcctgtgcagccccacctcccagatcgagaacgtgaacgaggaggagatggacacctccatcagccactacaaacgaaagacaatgaatgactttgactatctgaagcttctgggcaaaggcaccttcgggaaagtcattctggtgagggagaaggcgagtggcacctactacgccatgaagatcctgaagaaggaggtcatcatagccaaggatgaagttgctcacacgctcacagaaagtagggtattaaaaaacactcggcatccattcctaacttctctgaagtactcgttccagacgaaggatcggctgtgctttgtaatggagtacgtcaacggaggagagctgtttttccatttgtcaagagaaagagttttttcggaggaccgcactcgtttctacggcgctgagatcgtctctgctttagactacctacattctgccaagatcgtctatcgtgatctgaagctggagaacctcatgttggacaaagacggccacatcaagatcacagacttcggcctctgcaaagaaggcatcaccgacactgccaccatgaagaccttctgtggaacaccagagtacctggctcctgaggtgctggaggacaacgactatgggcgggcggtggactggtggggtttgggcgtggtgacgtacgagatgatgtgcggccgcctgccgttctacaaccaggaccacgagaagctgtttgagctcatcctcatggaggagatcaagttcccacggaccctgtcggcggacgccaagtcgctgctgtcagggctgctgatcaaggaccccaacaaacggctgggcggcggaccggatgacgctaaggagatcatgcgacacagtttctttggcacagtcgactggcaggacgtctacgacaagaagctggtcccgcctttccagccgcaggtctcctcggagacggacacacgctactttgacgaggagttcacagcacagaccatcaccatcactccgccagagaaatgtaaggacgcccttgaattaagttgtagagtgttaagagtattttgttcaccgcatgtttttttttatttaagtcaaacctga
>ENSSAUG00010000603|rptor
atgaaaatggactcagacttgcttcattcgccggccgtgggcctcacagaggaagaggaggccgacatgaatgactggaaacttccgctggccttcatgaagaaacgacattcggagaagattgagggttccaaggccctagcgcagagctggaggatgaaggacagggttaaggatgctccttgtgctgagttactctgtgttttctgggcagatcctctgtcgatgagtccacagaaagccttggagactatcggggctaacctgcagaagcaatatgaaaactggcaacccagggcgcgatacaagcaaagtctggaccccacagtggacgaggtgaagaagctgtgcacgtcgctgagacgtaacgccaaagaggagcgagtcctcttccactacaacggtcacggggtgcctcggcccaccgtcaacggagagatctgggtctttaataagaactacacccagtacatcccgctgtccatctacgacctgcagacgtggatggggagcccttccatttttgtctatgactgctccaatgcgggcatcattgtcaagtcatttaaacagttcgccctgcagagagagcaggagctggaggtggcagccatcaatcccagccacccgctcgcccagatgcctctgccgccctcaatgaagaactgcatccagctggctgcctgcgaggccagcgagctgctgcccatgaaccccgacctccctgctgacctcttcacttcctgcctcaccacgcccatcaagatcgccctccgatggttttgtatgcagaagagtgccaagttggtgcctggggtgacgttagacctcatcgagaagatccctggcaggctcaatgacagacgcactcccctaggagagctcaactggatcttcacagccatcaccgacaccatcgcctggaatgtgctgcctagagatctgttccagaagttgtttcgtcaggacctgctggtggccagcttgttccgcaatttcctgttagcagagaggataatgaggtcgtacaactgcacgccggtcagcagtcctcgtctgccccctacatacatgcacgccatgtggcaagcatgggaccttgccgtggacatctgcctctctcagctgcctaccatcattgaggagggcaccgccttcagacacagtcctttctttgcggagcagctcacggcatttcaggtgtggctgacgatgggcgtggagaacaggaaccctcctgagcagctgccgattgtactacaggtcctcctcagtcaggtgcatcggctgcgggctctagatctgctggggcgcttcctggatctgggtccgtgggccgtcagcctggcgctgtctgtggggatcttcccctacgtgttaaagctgctacagagttcagccagagagctgcggccactgttggtgttcatctgggctaaaatccttgctgtggacagttcatgtcaagctgacctggtgaaagacaacggtcataagtacttcctttctgtgctggctgacagttacatgccagctgagcatcgaaccatggctgtgtttatattggctgtcatcgtcaacagctacaacacaggacaggaggcctgtctgcagggcaacctaatagccaactgcctggagcagctgtcagacccccaccctttgctccgccagtgggtggccatttgcctgggccgcatctggcagaacttcgacccagcgcgctggtgtggagttcgggacagcgcccacgagaagctctacactctgttgtctgatccaattcccgaggtgaggtgtgcggctgtttttgctctcgggacatttgtggggaactctgctgagaggacggaccactccaccaccatcgaccacaacgtggccatgatgctggcccagctcatcaatgatggcagccctgtggtccgcaaggagctggtcgtagcactgagtcacctggtggtccagtatgagagcaacttttgtacagttgccctccagtttatagaagaggagaagaactacacagtgccgtcaccagccaacaccgcagagcccggtaacctgactccagtgagggacagccctgccatcccacgcctgcgatcagtcaactcctacaccaacatccgagctgccaccactgcccgcaacctgaacaagagcctgcagaacctcaacctcaatgaagagggtggaccagccgctttctctcctggtaacctgagcaccagcagcagcgccagcagcaccctggggagcccagacaacgacgagtacatcctctctttcgagaccattgacaaaatgcgacgggtgtcctcctattcttccctcaactcactcataggtgtgtccttcaacagtgtttacactcagatctggagggtgctgctacatcttgctgctgaccctttccctgaagtgtcggacctggccatgaaggtcctcaacagcattgcgtataaggcaacaatgaacgctcggcctcagaggatcctggactctggatctctcacccagtcagccccagccagccccaccagcaagggcacgcacatccaccaggtgggcacctcatctccatctggctctcctcccatgccgagcaccagcagctccagtctgaccaacgaggtgcccaagccccccaccagagagcagacgtccacacggcctccttacacccctacattaggaggacaggcaccccactcccaccagttcccccgcactcgcaagatgtttgacaagggacctgagcaggcaggtgaggatggtgatgagccaggtggtcacaggaactacatctgtcccgcccttcaaacaggcctttgtgattggagtgcaaagtattttgctcagcctgtcatgaagatcccagaggagcatgacctggagagtcaggtgaggatggagcggcagtggaggttcctgagaaacacgcgcgtgagaaggcagagccgaggcatcactcaaagaggtgtctcccgtctggatgatcaaatattcatcaaccgaaaccctggagtaccgtctgttgtgaagttccaccccttcaacacctgcatcgctgtggccgacaaagacagcatctgtttctgggactgggagaaaggcgagagactggactacttctataacggaaaccctcgttacacgcgcatcacagccatggagtacctgaacggacacgactgttcattactgctcaccgcaacagacgacggggcgttgcgtatctggaagaactttgccgaccagaagaacccagagatggtgacggcatggcagggcctttccgacatgctgcccactaccagaggtctggccagaagggtctccatctatcttgacaggagtaagcaaggaggtgcaggtatggtggtcgactgggagcaggagacgggcctcctcatgacgtctggagatgtacgagtcatcaggatctgggacactgacagagagatgaaggtccaggacatcccgacaggagcggacagctgtgtgaccagcctgtcctgcgactcccagcgctcgctcatcgttgccggcctgggtgacggatctgtgcgtgtattcgacaggaggatgggtccaaatgaatgccgggtgatgacctacagggagcatggtgcctgggtagtcaaagctcatctacagaaggagacagacggacacatcatcagcgtcagtgttaacggagatgttcgtttctttgaaccacggactccggactccatcaacgtgctgcagacggtgaaggggttgacagccctggacatccacccgcaggccaacctgtttgcctgtggatcaatgaaccagttcatagccgtctacaatgctaacggcgatgtgatcagcaacataaagtactatgacggcttcatgggacaaaggattggggccatcagctgtttagccttccatccgtactggccccacttggcggtaggcagcaacgactactacatgtcaatctattcagcggagaagaggctcagataacacaccagcattcatcaccccccctccccccaaccaaaccaccacatatgacttctgaccctgagcctcgagctctgggatgtaaatgatgtttttgttgtacatatgcaattaccaccctgaatgttctagtgatggctgctgacaaaaactcatgctacgaacgacgatatatatatatattattattattattattattattctcattgtttattcatattcttattatgaagctaatgattgtagacttggctgtgctgaggagtgtgtatatttaaatagcgtatacagaagaatagaggttctattttaaagaagtggtacccacccatcactggggctcctcctcgtgactcagcgagcatcactacctgaatggactgtgactccagtgaacctagaagtggcaagacgagggggggggtcgcccggaggacaacagacaccgttgaaacacagacaacacgggctcaccctccgatggaccccgttgtgtttatgaattaattttaatggccgtcttgcagccgaaggacagagtttcgctacttggctgcgacgctagcaagacgtgtggagggatggacccagatggactggcgtgcgtgcgttaaaatggattatagcacagatgtgccccacactgggccttcatagtcttggacgtgatacccaaaaacgatgcctgctaccatgctagaactctccttcttccttcatccttcccccagcgtcctaaacataatcatatatttttcatgcaggcccctttgttgtggctcagagggctgtttctgttttttaacttatctcctgtaaaaagggaaaacctctattgccccttggatgatacacactcttgtatctagcacagtgagaggagggctggattggtcctgcagtacccgcctacctgccctgcaaagcaataaaagcctcccatgattca
>ENSSAUG00010000467|akt3b
atggaaccagcaacccaacccaaatgtcatcttttcaacacttactactgtccaaatgacgtccttacagggttcaaagtgaaagtttttacattagtctttaatcttcagcttcagtcacagacgtgtgaagatgttttggtcatccaaacttggaatattagcttacttgatgaaggtgagtacatcaagaactggcgaccgcgctactttctgctgaagacagacggctctttcatcggctacaaggacaaaccgcaggactctgacctggcctacccgctcaacaacttctctgtagcaaaatgtcagctgatgaagaccgagcggcccaaacccaacaccttcatcatccgctgcctgcagtggaccaccgtcatcgagaggacttttcacgtcgacactcctgatgagagggacgaatgggccgaggccatccagatggtcgccgagtctctggccaagcaggaggaggagggcatcctgtgcagccccacctcccagatcgagaacgtgaacgaggaggagatggacacctccatcagccactacaaacgaaaggtgacgtcaagtcagaatgtaaagcagcagctgtggttgctttacgttcgacttacactagaagtcgtctgcaggcgatctccgtccgtctcctcgttcatcactctgcctctctcttctctcttctgttcaccacaggatgaagttgctcacacgctcacagaaagtagggtattaaaaaacactcggcatccattcctaacttctctgaagtactcgttccagacgaaggatcggctgtgctttgtaatggagtacgtcaacggaggagagctgtttttccatttgtcaagagaaagagttttttcggaggaccgcactcgtttctacggcgctgagatcgtctctgctttagactacctacattctgccaagatcgtctatcgtgatctgaagctggagaacctcatgttggacaaagacggccacatcaagatcacagacttcggcctctgcaaagaaggcatcaccgacactgccaccatgaagaccttctgtggaacaccagagtacctggctcctgaggtgctggaggacaacgactatgggcgggcggtggactggtggggtttgggcgtggtgacgtacgagatgatgtgcggccgcctgccgttctacaaccaggaccacgagaagctgtttgagctcatcctcatggaggagatcaagttcccacggaccctgtcggcggacgccaagtcgctgctgtcagggctgctgatcaaggaccccaacaaacggctgggcggcggaccggatgacgctaaggagatcatgcgacacagtttctttggcacagtcgactggcaggacgtctacgacaagaagctggtcccgcctttccagccgcaggtctcctcggagacggacacacgctactttgacgaggagttcacagcacagaccatcaccatcactccgccagagaaatgtaaggacgcccgtctgcctgcagcgacagcgggctga
>ENSSAUG00010001919|cdh15
ctgaagtgcgtgaccatacttgccaaccttgagacctcaaaaataagggggattttcaagaactccgcagaacctcatcacaatgaagaagagctgcccctgcagacccttaacccatggagaaatcaaggcaagggagtggtgagggtgaagagggactggatcatccctccgataagagtgctggagaatagcaagcaagttccggaagaccttgtccagatcaaatcggacaaaatctttacaggtgaggtgatctacaagttagagggaccgggggtggaccaggagcccaagaacctctttgagattgatgataaaaccggagttatcaggagcaagcggccgctggacagagagaaatacgacaccttcacgctgaaagcctttgcgctgtcccccagtggagagagactggagaatcctaccaccatagagatagtggtcctggatcagaatgacaacagacctgccttcacccagagccagtttgttggctctgtctctgagttctcagtcccaggcacgtcagtgatgtcagtgtcagccactgatgcagatgacccaaagacagaaaacgcttatctgagctactctatcattggccaggagagcatccctgccagcgctgttaccaagacaatgttcggtatcaacaaccagacgggagccatctacacaagagacgtaggcctggatcgagaggtggtgaaaagtttccgattaaagctgcagattgccgatatggggggcatgggactgacaagtgaaggcgtggcaatcatacatgtgtccgacatcaacaaccacgccccacagttcagccccgcctcgtacagtatgatagcagtggagaacaggaaggactatgagatcggccgggtgaatgtgacggacagagacgatcatggaacaaggaactgggaggccaaatacttcattaccaatgaccctgatggcctcttcgccatcagtactgatcccgccaccaaccagggcgttctgacagtggtgaagcctttagattttgaagcgcaggatgagtacacgctgattctgatggtggaaaatgtcagtcctctgagcaacaaggcgcccaacctcccagtgagcaccgctacagtcgctgtgactgttgtgaacgagaacgaggctccacatttcagagaggaccccataaagattgttgtccctgagtctgtggatcctgggactctactgacaaacaacatcgcttttgaccctgataattctgacctgaggtatgagtttagcagagatcccgagagttggctggacattgacagggatacgggagacattagcgccaggagagcctttaacatgcgatccccacatgtcaagaacaatatctacattgctgtcgtcaaggttacagatgctgatggtatgtcgtccactgcctccgtggtcatcacactgaaggagaccaatgacttcccccctcagctcctccctctgagtggctctgtatgtaagggcgcaggccggaagcgttctggtctggtcgtgaccgctgtggatgaagatcttcctccgcaagctgcacccttcacctttgcaatgcactatgacatgtcactgaactggactgttattcaagtcaacgacactcacgctgtgcttcagcccctcgtggagctggaggcgggagattacatggtcacggtgatggtgtcagactccggcagtccagttatgagttcctatgctcaggtcaatatcaccgtgtgtctctgcgactcctttggagattgtaagtctgtaacaggggctatcctcggctccagtgtgggaatcagcttcatctttctcatcatcatcatggccagtgttgcactcctgctgttgctgctcctcctggctgtggcggtgaccacctgcaggagacgccaccatatcaagaaaggaacaggtctgcttgtcggggaatcggaagacgacatacgtgacaatgtcttcaactacgatgagcaaggagggggtgaggaggacgagaacgcctttaacgtcgacctgctgtggaatccccacgatgcaccttcgaccccgggctcctactacccagggtaccctggtgttcctcgtggcaagcagcccctcaggaaagatgccccgcataacctgccctcacctatctacccacgaaggcctcctgcagaccccactgacatcgaggactacatcaatgatggcctggaggctgcagacaatgatcctaacgtgcctccatacgacacagctctgatctatgactatgagggagagggctcactggcaggcagcctcagctccatcgcttcaggcagctctgacggagaccaagactacgactacctcaatgactggggaccacgctttcagaaactggatcatttggacaaaatgtcttgttgcaaagttttgttattagttaaggagaagtaa
>ENSSAUG00010002070|akt2l
agagagtccatggtgttttcctgggtggatggcctgcactggatctagcctgtcaaaactgcagtggaactagagcaacgagggataaagtcggaataatgggctgttcagatctagataactgtgactgagacttgaagggcttgcagagaagtccacagttcccctacctgacctcttgttcctgacactctttgaaacacatctcttaccatgaatgaagttaatatagtcagagaaggttggctgcataaaagaggtgaatatatcaaaacatggaggcccaggtatttcatcctgaagagtgatggttccttcattggttataaggagaaacctgatctaaatgaccagactttaccaccactcaacaatttctcagtggcagaatgccagttaatgaagactgaaagaccccggcccaacacatttgtcatacgttgtctacagtggaccactgtcattgaacgtacttttcatgtggacagtaatgaggagagagaggagtggatgtgggcaatccagtctgtggcaaatagtttaaagatgcgggaacaggaggaggaagagccaatggatgtgttcggctcacccagccaatgcagcttggaggagatggaagtggctatgtctaagagcggcaccaaagtgacgatgagtgactttgagtacctgaagctgcttgggaaggggacgtttgggaaggttattctggtcaaagagaaatccatgggagtccattatgccatgaaaatactgcgcaaagaggtcattatagccaaggatgaggtggcccacacagtaacagagagcagagtgttacaaaacacacgacaccccttcctcacgacactgaaatatgccttccaaacccacgatcgactctgttttgtcatggaatacgccaacggaggcgagcttttcttccacctttcacgcgaacgagtgttcacagaagaccgggcacgcttctacggtgcagagattgtgtcagcacttgagtacctccattcacgtgatgttgtttaccgtgatctgaagctggagaatctgatgctggacaaagacggccacatcaaaatcactgattttggtctttgtaaagagggcattacccctgatgctaccatgaaaaccttctgtggaactcctgaatatctggcacctgaggtcctagaagataatgactatggcagggcagtggattggtggggtctgggtgtcgtcatgtatgagatgatgtgtggccgtctgcctttctacaaccaagaccatgagcgtttgtttgaactcatcctcatggaggagatccgtttccccaggaacctgtcacccgaagccaagtctctgctggcaggtcttctcaagaaggaccccaaacagaggttaggtggaggtcccgatgatgccaaagaagtaatgactcacaaatttttcatcaccataaactggcaggatgtggtacagaagaagctcaccccactcttcagaccacaagtgacatcagagacagacacccggtactttgatgaggagttcacagcgcagaccatcacactcactcctccagacaagtgtaagtatcctctgactgtaactactctgtgtgtagcgccttcaggtggcctaacaactactgctgctttttcagactctaaaccatcgaacattttaactttctcctttttttggtctttcaagacgccatacagtccttcatga
>ENSSAUG00010000467|akt3b
atggaaccagcaacccaacccaaatgtcatcttttcaacacttactactgtccaaatgacgtccttacagggttcaaagtgaaagtttttacattagtctttaatcttcagcttcagtcacagacgtgtgaagatgttttggtcatccaaacttggaatattagcttacttgatgaaggtgagtacatcaagaactggcgaccgcgctactttctgctgaagacagacggctctttcatcggctacaaggacaaaccgcaggactctgacctggcctacccgctcaacaacttctctgtagcaaaatgtcagctgatgaagaccgagcggcccaaacccaacaccttcatcatccgctgcctgcagtggaccaccgtcatcgagaggacttttcacgtcgacactcctgatgagagggacgaatgggccgaggccatccagatggtcgccgagtctctggccaagcaggaggaggagggcatcctgtgcagccccacctcccagatcgagaacgtgaacgaggaggagatggacacctccatcagccactacaaacgaaagacaatgaatgactttgactatctgaagcttctgggcaaaggcaccttcgggaaagtcattctggtgagggagaaggcgagtggcacctactacgccatgaagatcctgaagaaggaggtcatcatagccaaggatgaagttgctcacacgctcacagaaagtagggtattaaaaaacactcggcatccattcctaacttctctgaagtactcgttccagacgaaggatcggctgtgctttgtaatggagtacgtcaacggaggagagctgtttttccatttgtcaagagaaagagttttttcggaggaccgcactcgtttctacggcgctgagatcgtctctgctttagactacctacattctgccaagatcgtctatcgtgatctgaagctggagaacctcatgttggacaaagacggccacatcaagatcacagacttcggcctctgcaaagaaggcatcaccgacactgccaccatgaagaccttctgtggaacaccagagtacctggctcctgaggtgctggaggacaacgactatgggcgggcggtggactggtggggtttgggcgtggtgacgtacgagatgatgtgcggccgcctgccgttctacaaccaggaccacgagaagctgtttgagctcatcctcatggaggagatcaagttcccacggaccctgtcggcggacgccaagtcgctgctgtcagggctgctgatcaaggaccccaacaaacggctgggcggcggaccggatgacgctaaggagatcatgcgacacagtttctttggcacagtcgactggcaggacgtctacgacaagaagctggtcccgcctttccagccgcaggtctcctcggagacggacacacgctactttgacgaggagttcacacgaacacatacggtggaaacacaaactacttga
>ENSSAUG00010001919|cdh15
tcagaaaaccacgcagaataatctgccctctgggatgaacttgtatgaatctgtggcataaagtaatatttgtcactctttgttcattttttgcccctgttccctccgaaggtctgctcatgccactgccctctgtttgtcaggccccccatggggatacatgtggtgcagcatccgtggcagatttttacagccatttcctttaaaacgttacggaagaggcaggaattcttctctccaaagtgtctgaaatttgtttaaatattctttctcatctccatttctctctgtctgtcacttgcttgcacgctgaggagaacgaggtgcagcggtacggcagactacatgctgtaccgtaccagaaacaggttacgataagtaacggaggagaaaggggataaactgtcttaaattgggtgaaatacgggagatttgtgacgcccggaggaatccaggagagggcagtcagactttcctgggaaatttgtcagggttggcaagtatgtgtgtaaccgcatcctgggtttattgctgcacaagacaatcgtgattggtttaaagttgccgaaacaagtcagagcttttacaaaagaatgataattggttcaagtaaaaaataaaataaaataaaaaatacaccattaacaatccaccccacccacctcctaatgtgaactttgtgactctttatacttctaccgcattacccaacatcctgagctttctttcctgagtttcatgaagttgttgttttctctcagatgtggagctccgcagaacctcatcacaatgaagaagagctgcccctgcagacccttaacccatggagaaatcaaggcaagggagtggtgagggtgaagagggactggatcatccctccgataagagtgctggagaatagcaagcaagttccggaagaccttgtccagatcaaatcggacaaaatctttacaggtgaggtgatctacaagttagagggaccgggggtggaccaggagcccaagaacctctttgagattgatgataaaaccggagttatcaggagcaagcggccgctggacagagagaaatacgacaccttcacgctgaaagcctttgcgctgtcccccagtggagagagactggagaatcctaccaccatagagatagtggtcctggatcagaatgacaacagacctgccttcacccagagccagtttgttggctctgtctctgagttctcagtcccaggcacgtcagtgatgtcagtgtcagccactgatgcagatgacccaaagacagaaaacgcttatctgagctactctatcattggccaggagagcatccctgccagcgctgttaccaagacaatgttcggtatcaacaaccagacgggagccatctacacaagagacgtaggcctggatcgagaggtggtgaaaagtttccgattaaagctgcagattgccgatatggggggcatgggactgacaagtgaaggcgtggcaatcatacatgtgtccgacatcaacaaccacgccccacagttcagccccgcctcgtacagtatgatagcagtggagaacaggaaggactatgagatcggccgggtgaatgtgacggacagagacgatcatggaacaaggaactgggaggccaaatacttcattaccaatgaccctgatggcctcttcgccatcagtactgatcccgccaccaaccagggcgttctgacagtggtgaagcctttagattttgaagcgcaggatgagtacacgctgattctgatggtggaaaatgtcagtcctctgagcaacaaggcgcccaacctcccagtgagcaccgctacagtcgctgtgactgttgtgaacgagaacgaggctccacatttcagagaggaccccataaagattgttgtccctgagtctgtggatcctgggactctactgacaaacaacatcgcttttgaccctgataattctgacctgaggtatgagtttagcagagatcccgagagttggctggacattgacagggatacgggagacattagcgccaggagagcctttaacatgcgatccccacatgtcaagaacaatatctacattgctgtcgtcaaggttacagatgctgatggtatgtcgtccactgcctccgtggtcatcacactgaaggagaccaatgacttcccccctcagctcctccctctgagtggctctgtatgtaagggcgcaggccggaagcgttctggtctggtcgtgaccgctgtggatgaagatcttcctccgcaagctgcacccttcacctttgcaatgcactatgacatgtcactgaactggactgttattcaagtcaacgacactcacgctgtgcttcagcccctcgtggagctggaggcgggagattacatggtcacggtgatggtgtcagactccggcagtccagttatgagttcctatgctcaggtcaatatcaccgtgtgtctctgcgactcctttggagattgtaagtctgtaacaggggctatcctcggctccagtgtgggaatcagcttcatctttctcatcatcatcatggccagtgttgcactcctgctgttgctgctcctcctggctgtggcggtgaccacctgcaggagacgccaccatatcaagaaaggaacaggtctgcttgtcggggaatcggaagacgacatacgtgacaatgtcttcaactacgatgagcaaggagggggtgaggaggacgagaacgcctttaacgtcgacctgctgtggaatccccacgatgcaccttcgaccccgggctcctactacccagggtaccctggtgttcctcgtggcaagcagcccctcaggaaagatgccccgcataacctgccctcacctatctacccacgaaggcctcctgcagaccccactgacatcgaggactacatcaatgatggcctggaggctgcagacaatgatcctaacgtgcctccatacgacacagctctgatctatgactatgagggagagggctcactggcaggcagcctcagctccatcgcttcaggcagctctgacggagaccaagactacgactacctcaatgactggggaccacgctttcagaaactggccaacatgtacgacccacgttaagatggactgcagcccagaggaaaaagaccggtgtgaaacaccaccagttagggacacagatgatgcctcaggtttacagaaaagattttagtccgggatacacatttgaggtgtaccaaggaaaaataaacgggccttcaatctaatgtgcctgggtttt
>ENSSAUG00010000467|akt3b
ttagaaaacccatcagctgtgagacgaggttgttttctcctccctgcaggtgagtacatcaagaactggcgaccgcgctactttctgctgaagacagacggctctttcatcggctacaaggacaaaccgcaggactctgacctggcctacccgctcaacaacttctctgtagcaaaatgtcagctgatgaagaccgagcggcccaaacccaacaccttcatcatccgctgcctgcagtggaccaccgtcatcgagaggacttttcacgtcgacactcctgatgagagggacgaatgggccgaggccatccagatggtcgccgagtctctggccaagcaggaggaggagggcatcctgtgcagccccacctcccagatcgagaacgtgaacgaggaggagatggacacctccatcagccactacaaacgaaagacaatgaatgactttgactatctgaagcttctgggcaaaggcaccttcgggaaagtcattctggtgagggagaaggcgagtggcacctactacgccatgaagatcctgaagaaggaggtcatcatagccaaggatgaagttgctcacacgctcacagaaagtagggtattaaaaaacactcggcatccattcctaacttctctgaagtactcgttccagacgaaggatcggctgtgctttgtaatggagtacgtcaacggaggagagctgtttttccatttgtcaagagaaagagttttttcggaggaccgcactcgtttctacggcgctgagatcgtctctgctttagactacctacattctgccaagatcgtctatcgtgatctgaagctggagaacctcatgttggacaaagacggccacatcaagatcacagacttcggcctctgcaaagaaggcatcaccgacactgccaccatgaagaccttctgtggaacaccagagtacctggctcctgaggtgctggaggacaacgactatgggcgggcggtggactggtggggtttgggcgtggtgacgtacgagatgatgtgcggccgcctgccgttctacaaccaggaccacgagaagctgtttgagctcatcctcatggaggagatcaagttcccacggaccctgtcggcggacgccaagtcgctgctgtcagggctgctgatcaaggaccccaacaaacggctgggcggcggaccggatgacgctaaggagatcatgcgacacagtttctttggcacagtcgactggcaggacgtctacgacaagaagctggtcccgcctttccagccgcaggtctcctcggagacggacacacgctactttgacgaggagttcacagcacagaccatcaccatcactccgccagagaaatatgacgaggacgggatggacgcggcggacaacgagcgaaggcctcatttcccacagttctcctactcagccagcgggcgggagtga
>ENSSAUG00010001867|lrp3
gaattatacatgtgtactttatcagctgaatatgggtttccagcaagtatgctatcataatgcactccttactgaaagtgatgactgatgctaccagttaatgattaaacatgtcttttattttgaagaggctgaccggatgtcgcgtggcttgctgcggctaccttgacccctggttctgggctcgctgcaggggacacaatgccttttcacggtgaggagctgcttgtacccgcgggttgtgtggtctgaaagcagatgtcggggctttgttggaggacacagatgtcgagcaaaccgaggagttcgtgtccgagataatagcagcgcagagtccccggcggccggacgatgggactgccggagctgctgctcggactgctgtggttccgctctgctctgctgtgtgcagcaggctgcagtgagcgagtggaggtccatacagagcggaggggtgtgatctacagcccctcctggcctttaaactacccctctggagtcaactgcagctggcacatccagggaggtcagggagaggtcattaccatcagtttccgtaacttcgacgtggcagagtcagggagttgtttgggagactggctcctgctgactcctgcgtggaaaggggaatccaggctgtgtggctccgtcctgcctccacccttcatctccaccaggggacgtgtttggctctatttccactctcaggccaacagctcggggcaagcacagggcttccgcctctcctacatcagaggtcacctcggtcagagcagctgtcagtcagatgaattcctgtgtgggaatggaaagtgtcttcctcgctcctggaagtgcaacagtcaggatgaatgtggcgacgccacagatgaacgcggctgctcccctccccccaccgatgcccagcctggcctctgccccttcggctccctcccgtgcaccgaggcccagtccacccgttgtctgcccgccaccctgcgctgcaacggagcccgtgactgtcatgatggcaccgacgagctgggctgtccagacaccacatgtggcaaacgtctggggaatttctatggctcatttgcttccccagattttttccggccaaacaggagcgccacagcagagctgagatgttcctggctgctggacacccaggaccccaagcctatcgtgctgcagctggacctgcggctggggcctggagactcgctgcatgtgtatgacggcctgctgcagcgggcagagcacctcttacaggtgttgtcctatcataacaacaggcgtccagcgctgttggagtcgagccgggggcagatgagtgttttgtacatggcccagcctcacagtcctggacacggcttcaacgcgacataccaggtcaaaggttactgttttccgggcgagcgtccctgtggcagtgatcagggctgctactctgaacgccaacgctgcgacggctactggcactgcccatcagggcgcgacgaggaggcctgcccgacgtgccctgaaggagagtttccttgcgagggtggtactggagtgtgctacccagcatctgagcgctgcaacaaccagaagaggtgtccagatgggtctgacgagaagaactgctacgactgccagcctggaaactttcactgcgggactaacttgtgcatctttgagacatggcggtgtgacggccaggaggactgcttagacgggagcgatgagagggactgcctggcagccgtgccccggaaggtgatcacagcagctctgattggcagtctggtctgcagcctcctgctggtcattgcactgggctgtgccctcaaactccactcactcaggaacagagagtacagagcttttgagactcagatgactcgaattgaggccgactttgttcaaagagaggctcccccatcctacggtcagttaatcgcccagggtctcatccccccggtggaggatttccctgtatacaaccccacccaggcctccgtattacagaacctgcggttggcgatgcgcagacagatcagacgtcactcaacacgacgcaccaactcctcctcctctcgtcgccgcctcggccatctgtggagtcatctgttccacagtggagtgcgagccagaggccacgcccccctgctcgacactcccgggcccacacagatcacattagggctccacagctaccgaacagtgcgtgtgcaagggccccaggaaagggcccggtctggagcagggctcggggaggacattaatgcattggcaggctcctgttgctcagccaccatggacctgcagccgtgcacgcctgagagccctgcgtcacctgtgtcctttccatcagaggaggaggaactgtcgcctgtcagtagggaaagcagcagggcttcacagtctgagccccacactcctgttcagaatgattcctcaacacagagcagacggcctaccactccccaggaagcctccatacccccatgccagccgcgggcatctaggaaactggttctggagcttgctgttaacctgaagggtgtttccctgagacgttactcccccttggggcccttgtcccctatctcaccccctgttttacccaacagctccctcacatctccaccccaccctcccttccaggggctcgaggtgacttcaccttctgaaccctcatcttctataaaagcagaggacagcgaatgccactttactgtggaagtgccaagcagggaaacaagaagcagggatgagaggaggagggagggcaagagcagactgtgcaggttcagcaggaccttcagtgatgaaggaggagattcagggagggagacaacgccatgctga
>ENSSAUG00010001062|bmp7a
atggtgacaggcgccttggagacgatggtgatcctcctgtcgtggggttactgcgtgctgtccacgcaggtcgccttctccaacttctccgtggacaacgacgtgcgctccagcttcatccagcggcggcttcggagccaagagcgcagggagatgcagcgggagatcctctccatcctcgggctgccgcaccgcccgcggccgcacgtttacaccaaacacaacgccgccccgatgttcatgctggacctgtacaacaccatctctgcagacccggagccgcccgggtactcttactacaagcccgatctgcctcaccagatgtccccgatggtgaccgcgcaggagagccgcttcctggatgacgcagacacggtgatgagttttgtcaatctcgttgaccaggatcaggaccttctgtaccagcagcacagaagagaatttcgatttgacctttcccgtatcccagagggagaggccgtcacagcagcagagtttaggatttataaagagttcatccaggaacgcaacgagaacgagactttcagggtcagtgtctaccaggtcctgcaggagcctcccaacagcgaagtggagctcttgctgttggaccagcgagaagtgtgggcggctgaggtgggctggctggcctttgacctgacgcagaacctcggcctgcacctggtcctggaggacagccacggtcaagcaagaataccatctttactggcggggctggtgataagcagcggacctcaggagaagcagcccttcatggttgccttcttcagagccaatgaggtgcgcttccgcagcattcgctctgcccatggccacaaggggcgccagtccaaccgctctaaaccccagaggactgtccaagatgcactgaaggcagtggaggctgcaacaggtaaccttggcttgtccaaagagggatgtaaaaagcatgagctgtacgtcagtttcagagatttaggatggcaggactggatcatagcaccagagggttatgcagcgtactactgcgagggagaatgcgccttccccctcaactcctacatgaatgccaccaatcacgctattgtgcaaactctggtccactttatcaacccggagatggtgccaaagccctgctgcgcccccacccagctccacggcatctctgtgctgtactttgacgacagctccaacgtcatcctcaagaagtatcgcaacatggtggtcagagcctgcggctgccattga
>ENSSAUG00010003494|igf2bp1
agagagaggaaaacattttcccgatctgatcccgccatagtttttcccactcttccaccacagacccatcaccaaatccatccagtacaacccacctcctccacagtgcgatagagaggctataggctgctgctttattcgtctgctggggccgggctgcaagtcaagggattcatttctcctcctgctccacttattctactggatttacggctaaattcaacgttaccatctggttttacacttctaaaatctctttttttttattttactttcctaacgagaatttacgtttcttccgttctgtgtttctttaaaaatatttttgagatattcttgccctctagcgagatttccactttcagttagtgtgacactatcttgttgcgctattagcagattcaggagataaactttttttcgctgggttaaattctagcatttccgggctttgttttttttttcttcgttttttggacttggaaaaacaatttccaccatgcacaagctatacattgggaatctaagcgacaacgtgactgctgaggacttagggaaaacctttgacgaccacaagatcccatactccggacagtttctaatgaaaaccggctatgcgtttgtggattgtccggacgatcagtgggccatgaaggctatcgagacgttttctggtaaagtggaacttcaggggaaacgtattgaagtcgagcactccgtccccaaaaagcaaaggaccaggaaattgcagatcagaaacattccacctcacttgcagtgggaggtgctggatggtctgttggcccagtgtgggaccgtcgagaactgtgaacaagtgaacacagagagtgagactgctgtggtaaatgtcacatatgcatcccgggagcatgccaggcaagccatccagaagctgaatggttaccagtttgagaacaatgccctgcgtgtctcctacatccctgatgagaactctgagctggagggaagccagagggggtccgattatggccgtcgacctggctatggctcccgaggcgggccccgcggtggttccccgagctcagggatgcccgccaaagctcagcacgtagacatccctctgagactgctggtacccacacagtacgtcggtgccatcattggcaaggagggagccaccattcgtaacatcaccaagcagacagcgagcaagattgacgtgcatcgcaaagagaacgcaggtgctgctgagaagccgatcagcatccactccacccctgagggctgctcggccgcttgccgcatgatcctggacatcatgcagcaggaagctaaagacaccaagactgctgatgaggttcctctaaagattctggctcataataactttgttggacgcctgattgggaaggagggacgcaacctgaaaaaagttgaacaggacacagacaccaagatcaccatctcacctcttcaggacctgacactgtacaatccagagagaaccatcacagtcaaaggcccgattgaagcctgctgcctagctgaggtggaggtcatgaagaaggtcagagaggcctatgagaacgacatcgctgctatgaatcaacagacccacctgatacctgggctcaacctgggtgctctgggcctcttcccctcctcctccaacatgccgccacccccgcctggaaactccacctctggtgctccctatggttgctttggggctccagaacaggagactgtccacgtatacatcccagcacaggcagtgggagccatcattggaaagaaagggcagcacatcaaacagctgagccgcttcgctggggcctccatcaagattgccccagctgaagctccagactctaaaatgaggatggtgattgtgacaggaccccctgaggcccagtttaaggctcagggcagaatttatggcaaactgaaggaggaaaacttctttggaccaaaggaggaggtcaaactggagactcacatcaagatggctgctgccgctgcagggagggtcattggcaaggggggcaagacggtgaatgagctccagaacctgacagcagctgaagtggtggtccccagggaacagacaccagatgaaaatgaccaggtcatcgtcaagatcaatggacatttctacgcaagccagttggctcagagaaagatccgggacatcctgacccaggtcaaacagccacagaaaggtgggatgggcatgggctctggctcaaacccccagggcttcacagagatgggcagccctacacaaggactgactcaggatcaacagccacgcaggaagtgagggtacccccaacctcctcacatgccgtgggccccccaacacctgacggacagacggatagacacatgcacggacggatagacagacgaatggacggacacaggagagcgacacacggacccagcgatagacagggagagatataaagagggagggagtacgcccgatagccagagagaaagatcagagtttagagagaaagagaggagatgaataaaatcacaacgaagaaatgaattaaaaaagag
>ENSSAUG00010002541|jag1b
agctgtttgtgtgtgcgcgcgcgctttgtttggttttgtttttttccgttgcactcatttcttctgtcctctcaacaggtgtcagagggatccggacaattcgagttgcaaatcttatcgatgcacaatgtgaacggagagctgttcagcggcatgtgttgtgatggctcgcggaccacggcggatagaaaatgcacgcgggacgagtgcgacacgttttttaaagtttgcctgaaggaataccagtcgagggtttctgctgcagggccctgcagcttcggaatgggatctacgcctgtcctcggagggaataccttttctttcaggagctcagtcaggaatgacaaatcccggatagttttgcccttcagttttgcctggccgaggtcctacactttgatagtggaagccttggacttcaacaatgaaaccagcgcagatgggaagctgattgagaaagcctctcattccggcatgatcaaccccagcccgcattggcagaagctgacacacaacggcccggtggctcagttcgagtatcagatccgggtcagctgcgacgagcactactacggcttcggctgcaacaagttctgtcggcccagagacgagttctttgggcattacacgtgtgactataacggaaacaagacctgtctggaaggctggtctggacctgactgcaacacagcgatatgtagacaaggctgcagcactgaacatggattttgtaaggagccagggggatgcaagtgtctgtatggctggcagggccagtactgtgacaagtgcatccctcaccctggctgtgtacatggcacctgtgtagagccatggcaatgcctgtgcgacaccaactggggcggccacctttgcgataaagatctgaactactgtggcactcaccagccatgcctgaatggagggacatgcatcaacacaggacctgacaagtaccaatgtacgtgtgctgagggctactctggtgccaactgtgagagagcggaacatgcctgtctgtccaatccatgctccaatggagggagctgttcagaaaccagccaaggttatgaatgtcagtgtgcgccaggctggagcggcccctcctgcaccatcaacattgacgactgctctccaaacccctgtaatcacggaggaacctgccaggatctggtgaacggctacaagtgtcactgtccttcacagtggacgggaaagacgtgtctgatagatgccaacgaatgcgatagcaagccttgtgacaatgacttggttaatggctatcattgtgtgtgcccccctggcttcgctggcgagcattgcgagagggacatcgacgaatgcgcgagctcgccgtgtctgaacggcgggcgctgtcaggacgaagtgaacagcttccagtgcctgtgtctggctggcttttcaggaaatctgtgccagctggatatcgattactgctccccaaacccgtgtcagaacggagccccctgcttcaacctggccacggactactactgcgactgccccgaagactatgagggcaagaactgctctcacctcaaagaccactgtcgcaccaccacatgtaaagtgattgacagctgcactgtcgctgtggcgtctaacagcacaccaggtggggagcgctacatttcatcaaatgtgtgcggaccccatggtcagtgtcgcagccaggccgggggtcagttcagctgcgagtgtcaggagggcttcagaggcacctactgccatgagaacatcaatgactgtgagagtaatccatgcagcaatggaggcacctgcatcgacaaagtcagtgtgtaccagtgcatctgccgcgacggttgggagggcgaccattgcgagatcaacatcgatgactgcagcaccagcccctgtcataatggagggacatgtcgagacctggtgactgatttcttttgcgagtgcaaaaatggctggaagggaaagacgtgccactcccgtgaaagtcagtgcgatgaggccacatgcaacaatggtggcacctgccacgatgagggcaacacgttccaatgcaagtgttccccagggtgggagggtacaacatgtaacatagccaaaaactcaagttgtcttccaaacccgtgtgagaatggaggtacctgtgtggtgactggagagtcgttcacctgcgtctgcaaagaaggatgggaaggtcccacgtgcacccagaataccaacgactgcagtccccacccatgctacaacagcggaacctgtgtcgacggggataactggtaccgctgcgagtgtgcctcaggcttcgctggtccagactgtcggatcaatattaacgagtgccagtcctctccatgtgcctttggctctacctgtgtggacgagatcaacggatatcgctgcctgtgtccaccagacaggactggaccccactgccaagaagtgacaagaaagcattgctctgtgaatggacacgtcacccctgatggagtcaaatgggacgaagactgcaacacttgccactgttccaatgggaaagtggtgtgcacaaagatgtggtgtggtcctacatcgtgccacctgggtgccaaaggtcgaggcgggtgtccttcaggccaaaactgcatccccatcagagagggccactgctttgtgaagccctgcctcgttttcggcgagtgctggcgctccaaccctcccccgcctcccaccaaatgccaccccagctccagttaccaggacaacagctgcgccaacatcaccttcaccttcaacaaggagaccatgactcaaattaggttttcacttgtgctcaaccatcgctccttgtctgagactactgaacaattcagtcacatctccaaacgtcatgttaaacctactgccaatgcaggccttgctcttcctttttactccttgattgctctcttatttttccatgtgcatttacatgtgctttctttttcttcttcgcgtccagggctcgtctgtggaggatgtatgcaagcagctgaggcgcttgtacgtagtgaagaatttctccttggagcattctgtgtccataacctgtga
>ENSSAUG00010002070|akt2l
agagagtccatggtgttttcctgggtggatggcctgcactggatctagcctgtcaaaactgcagtggaactagagcaacgagggataaagtcggaataatgggctgttcagatctagataactgtgactgagacttgaagggcttgcagagaagtccacagttcccctacctgacctcttgttcctgacactctttgaaacacatctcttaccatgaatgaagttaatatagtcagagaaggttggctgcataaaagaggtgaatatatcaaaacatggaggcccaggtatttcatcctgaagagtgatggttccttcattggttataaggagaaacctgatctaaatgaccagactttaccaccactcaacaatttctcagtggcagaatgccagttaatgaagactgaaagaccccggcccaacacatttgtcatacgttgtctacagtggaccactgtcattgaacgtacttttcatgtggacagtaatgaggagagagaggagtggatgtgggcaatccagtctgtggcaaatagtttaaagatgcgggaacaggaggaggaagagccaatggatgtgttcggctcacccagccaatgcagcttggaggagatggaagtggctatgtctaagagcggcaccaaagtggatgaggtggcccacacagtaacagagagcagagtgttacaaaacacacgacaccccttcctcacgacactgaaatatgccttccaaacccacgatcgactctgttttgtcatggaatacgccaacggaggcgagcttttcttccacctttcacgcgaacgagtgttcacagaagaccgggcacgcttctacggtgcagagattgtgtcagcacttgagtacctccattcacgtgatgttgtttaccgtgatctgaagctggagaatctgatgctggacaaagacggccacatcaaaatcactgattttggtctttgtaaagagggcattacccctgatgctaccatgaaaaccttctgtggaactcctgaatatctggcacctgaggtcctagaagataatgactatggcagggcagtggattggtggggtctgggtgtcgtcatgtatgagatgatgtgtggccgtctgcctttctacaaccaagaccatgagcgtttgtttgaactcatcctcatggaggagatccgtttccccaggaacctgtcacccgaagccaagtctctgctggcaggtcttctcaagaaggaccccaaacagaggttaggtggaggtcccgatgatgccaaagaagtaatgactcacaaatttttcatcaccataaactggcaggatgtggtacagaagaagctcaccccactcttcagaccacaagtgacatcagagacagacacccggtactttgatgaggagttcacagcgcagaccatcacactcactcctccagacaagtataacagtctggactgcgaggactccagccagcaagcacatttcccccaattttcttactctgccagcataagagagtga
>ENSSAUG00010002541|jag1b
atgtcaaagtttgtttggttttgtttttttccgttgcactcatttcttctgtcctctcaacaggtgtcagagggatccggacaattcgagttgcaaatcttatcgatgcacaatgtgaacggagagctgttcagcggcatgtgttgtgatggctcgcggaccacggcggatagaaaatgcacgcgggacgagtgcgacacgttttttaaagtttgcctgaaggaataccagtcgagggtttctgctgcagggccctgcagcttcggaatgggatctacgcctgtcctcggagggaataccttttctttcaggagctcagtcaggaatgacaaatcccggatagttttgcccttcagttttgcctggccgaggtcctacactttgatagtggaagccttggacttcaacaatgaaaccagtggtgagtatgggaagctgattgagaaagcctctcattccggcatgatcaaccccagcccgcattggcagaagctgacacacaacggcccggtggctcagttcgagtatcagatccgggtcagctgcgacgagcactactacggcttcggctgcaacaagttctgtcggcccagagacgagttctttgggcattacacgtgtgactataacggaaacaagacctgtctggaaggctggtctggacctgactgcaacacagcgatatgtagacaaggctgcagcactgaacatggattttgtaaggagccagggggatgcaagtgtctgtatggctggcagggccagtactgtgacaagtgcatccctcaccctggctgtgtacatggcacctgtgtagagccatggcaatgcctgtgcgacaccaactggggcggccacctttgcgataaagatctgaactactgtggcactcaccagccatgcctgaatggagggacatgcatcaacacaggacctgacaagtaccaatgtacgtgtgctgagggctactctggtgccaactgtgagagagcggaacatgcctgtctgtccaatccatgctccaatggagggagctgttcagaaaccagccaaggttatgaatgtcagtgtgcgccaggctggagcggcccctcctgcaccatcaacattgacgactgctctccaaacccctgtaatcacggaggaacctgccaggatctggtgaacggctacaagtgtcactgtccttcacagtggacgggaaagacgtgtctgatagatgccaacgaatgcgatagcaagccttgtgacaatgccaactcatgccgcaacctgattggtggatacttctgcgagtgcatccctggttggatggggcagaactgcgacatcaatataaatgattgcaaggaccagtgccagaatgggggaacttgcaaggacttggttaatggctatcattgtgtgtgcccccctggcttcgctggcgagcattgcgagagggacatcgacgaatgcgcgagctcgccgtgtctgaacggcgggcgctgtcaggacgaagtgaacagcttccagtgcctgtgtctggctggcttttcaggaaatctgtgccagctggatatcgattactgctccccaaacccgtgtcagaacggagccccctgcttcaacctggccacggactactactgcgactgccccgaagactatgagggcaagaactgctctcacctcaaagaccactgtcgcaccaccacatgtaaagtgattgacagctgcactgtcgctgtggcgtctaacagcacaccaggtggggagcgctacatttcatcaaatgtgtgcggaccccatggtcagtgtcgcagccaggccgggggtcagttcagctgcgagtgtcaggagggcttcagaggcacctactgccatgagaacatcaatgactgtgagagtaatccatgcagcaatggaggcacctgcatcgacaaagtcagtgtgtaccagtgcatctgccgcgacggttgggagggcgaccattgcgagatcaacatcgatgactgcagcaccagcccctgtcataatggagggacatgtcgagacctggtgactgatttcttttgcgagtgcaaaaatggctggaagggaaagacgtgccactcccgtgaaagtcagtgcgatgaggccacatgcaacaatggtggcacctgccacgatgagggcaacacgttccaatgcaagtgttccccagggtgggagggtacaacatgtaacatagccaaaaactcaagttgtcttccaaacccgtgtgagaatggaggtacctgtgtggtgactggagagtcgttcacctgcgtctgcaaagaaggatgggaaggtcccacgtgcacccagaataccaacgactgcagtccccacccatgctacaacagcggaacctgtgtcgacggggataactggtaccgctgcgagtgtgcctcaggcttcgctggtccagactgtcggatcaatattaacgagtgccagtcctctccatgtgcctttggctctacctgtgtggacgagatcaacggatatcgctgcctgtgtccaccagacaggactggaccccactgccaagaagtgacaagaaagcattgctctgtgaatggacacgtcacccctgatggagtcaaatgggacgaagactgcaacacttgccactgttccaatgggaaagtggtgtgcacaaagatgtggtgtggtcctacatcgtgccacctgggtgccaaaggtcgaggcgggtgtccttcaggccaaaactgcatccccatcagagagggccactgctttgtgaagccctgcctcgttttcggcgagtgctggcgctccaaccctcccccgcctcccaccaaatgccaccccagctccagttaccaggacaacagctgcgccaacatcaccttcaccttcaacaaggagaccatgactcaagtgagttacctaggcagcagggagggagagattgaattaaagggttttagggggtcgtttttcatttttggtgttcttaactccatcttcatcgtcatctgggtgctcgtgctcgtcagcattttgctgtggtgcatgcggcgacggcggaaacagagcaaccataacgggacgacggccgccggctccgaggacaacacgaccaacaacgtgcgggagcagctgaaccagatcaagaaccctatagagaagcacgtgggcctcactgtggccatcaaagactatgaaaacaagaactccatcattgccaaaataaggacaaatcatcccgagggggatgaggacgacaaggagaggcacttacagaagggccgctttgccaaacagccagcatacacactggtggagagggacgagaagacgcccatctccaatcccaactccacgtccaaaaatcctaattggactaataaacaggacaacagagacttggagacagcaaacagcataaacaggatggactacattgtatag
>ENSSAUG00010002312|PAX7
cctggtgtgctgtgcaggcaggcagatgtgctggtgtggaggctgcagagcctattgtctatgttagagacctatgacgagtttcagtgtgagtgggttgtgaatctctctctctctctctctctctctctctctctctctctttctctgtgtgtgtgtgtgtgtgtgtgtgtgtgtctttatcccttcattcccattggctgctgaaacttggtggagcttttccctcccgagtaagagaaagcctcaagaacctatcggtgctcgcgacccgtccccccttctcgagcccgcctggtccagacttgtccaggggaccgtcagatgagtccttcacaacggttaaataagctggtgtcagagacagacgcttccatacagtgaacacatgaacagtgtgaggactccatgagccctgtcagcctgactgcagtggaggtctcatattgatcttttcatatttttttctcatccatcacacaccggagcgctcacacatttccacctctgaaacacttgtagcaacacatcgacacgtgatttggacatccagacagctttcggtctttttttgcctttttttttttgtatctctccttttttttttttttttttttttttttttaaatgttacaatgtcgtctttgccaggaactgtaccgcggatgatgcgcccggctcccggacagaactacccccggactggattccctctggaagtgtccactcctctgggccagggacgggtcaaccagctcggaggtgtctttatcaacggccggccgctgcccaaccacatccgacacaagatagtggagatggcccaccacgggatccggccctgcgtcatctcccggcagctgcgggtctcccacggctgcgtctccaagatcctctgccgctaccaggagaccggctccatccggcccggagcgataggaggcagcaagcccaggcaggtagccacgccggacgtggagaagcggatcgaggagtacaagcgggacaaccccggcatgttcagctgggagatccgggataagctgctgaaggacggcgtgtgtgacagaagcacagtcccttcaggtgaggcctcctctgtgagttcgatcagccgtgtacttcgggctcggtttggaaaaaaggacgatgaggaggagtgtgataaaaaggatgaagacggagagaagaaaagcaaacacagcatcgacggcatcctcggcgacaaaggtagtcggatggacgaagtgtcagatgtggagtcagagcctgacctccccctcaagaggaagcagcgcaggagtcggaccacattcacagcagagcagctggaggagttggagaaggcttttgaaagaacccactaccccgacatctacacaagagaagagctggcccagaggaccaaactcactgaagccagggtccaggtgtggttcagcaatcgaagggccagatggcggaaacaagcaggagccaatcagcttgcagcatttaaccacctgttgccgggtggatttcctcccacggggatgccaacacttcctacataccagctgccagattccagctacccaacaaacactctgccccaagatggtagtggtacagttcaccgtccccagccgttacctccatccaccatgcaccagagcggtctctccagcacagacagcagctctgcctacggtatcgcctccaaccgccatggcttctccagctactccgacacctttatgagctcttccgcaccgagcaaccatgtcaaccctgtcagcaacggactctccccacaggtaaacctgctggactacttccataattacaccaagatttttggcttgatttgtagatttaagtgtcacagtttcatggtgaacgctgacttgtaa
>ENSSAUG00010002312|PAX7
cctggtgtgctgtgcaggcaggcagatgtgctggtgtggaggctgcagagcctattgtctatgttagagacctatgacgagtttcagtgtgagtgggttgtgaatctctctctctctctctctctctctctctctctctctctttctctgtgtgtgtgtgtgtgtgtgtgtgtgtgtctttatcccttcattcccattggctgctgaaacttggtggagcttttccctcccgagtaagagaaagcctcaagaacctatcggtgctcgcgacccgtccccccttctcgagcccgcctggtccagacttgtccaggggaccgtcagatgagtccttcacaacggttaaataagctggtgtcagagacagacgcttccatacagtgaacacatgaacagtgtgaggactccatgagccctgtcagcctgactgcagtggaggtctcatattgatcttttcatatttttttctcatccatcacacaccggagcgctcacacatttccacctctgaaacacttgtagcaacacatcgacacgtgatttggacatccagacagctttcggtctttttttgcctttttttttttgtatctctccttttttttttttttttttttttttttttaaatgttacaatgtcgtctttgccaggaactgtaccgcggatgatgcgcccggctcccggacagaactacccccggactggattccctctggaagtgtccactcctctgggccagggacgggtcaaccagctcggaggtgtctttatcaacggccggccgctgcccaaccacatccgacacaagatagtggagatggcccaccacgggatccggccctgcgtcatctcccggcagctgcgggtctcccacggctgcgtctccaagatcctctgccgctaccaggagaccggctccatccggcccggagcgataggaggcagcaagcccaggcaggtagccacgccggacgtggagaagcggatcgaggagtacaagcgggacaaccccggcatgttcagctgggagatccgggataagctgctgaaggacggcgtgtgtgacagaagcacagtcccttcagtgagttcgatcagccgtgtacttcgggctcggtttggaaaaaaggacgatgaggaggagtgtgataaaaaggatgaagacggagagaagaaaagcaaacacagcatcgacggcatcctcggcgacaaaggcagtcggatggacgaagtgtcagatgtggagtcagagcctgacctccccctcaagaggaagcagcgcaggagtcggaccacattcacagcagagcagctggaggagttggagaaggcttttgaaagaacccactaccccgacatctacacaagagaagagctggcccagaggaccaaactcactgaagccagggtccaggtgtggttcagcaatcgaagggccagatggcggaaacaagcaggagccaatcagcttgcagcatttaaccacctgttgccgggtggatttcctcccacggggatgccaacacttcctacataccagctgccagattccagctacccaacaaacactctgccccaagatggtagtggtacagttcaccgtccccagccgttacctccatccaccatgcaccagagcggtctctccagcacagacagcagctctgcctacggtatcgcctccaaccgccatggcttctccagctactccgacacctttatgagctcttccgcaccgagcaaccatgtcaaccctgtcagcaacggactctccccacaggtgatgagcattctgagtaaccccagcggtgtttcttcacagccacagcacgacttctccatatcaccactccatagtgccctggactcctctccatccaatgccatctcagcgagctgcagccagcgatcagctgagtcttccattaagacggtggacagccttccgtcatcgcagtcctactgcccccctacatacagcaccaccagctacagcatggatcccactgtggctgctgccggttaccagtacagtcagtacggccagagtgaaataattcagtcaacattgacttgttggttacaatataatacagttacacctattaagaaactgctactcaatggagacagatggacaggcgctccacagctgaacctgtaa
>ENSSAUG00010004893|myod1
atggagctgtcggatatctctttccccatccccgccgcggatgatttctacgatgacccctgcttcaacaccagcgacatgcacttcttcgaggacctggacccgcggctggtccatgtgggcctcctgaagccggacgactcctcctcttcagacgacgagcacgtccgcgcccccagcgggcaccaccaggcgggccgctgcctgctctgggcctgcaaggcctgcaagaggaagaccaccaatgcggaccggcggaaggcggccacgctgcgggagcgccggcggctcagcaaagtcaacgacgccttcgagaccctgaagcgctgcacgtcggccaaccccaaccagcggctgcccaaggtggagatcctgcgcaacgccatcagctacatcgagtccctgcaggcgctgctgcgcggcggccaggacgacggctactacccggtgctggagcactacagcggggactcagacgcctccagcccccggtccaactgctccgacggcatgacggactttaacggaccgagctgtcagtccaacagaagaggaagttacgacagcagctcttatttctctgagactccaaacggcggtctgaagagtgagcgcagctcggtggtctccagtctggactgtctgtccagcatcgtggagcggatctccaccgacaccagcagcctgctgccggccgccgacggccccgcgtccccgaccacacccccgtccggcgaggccgcggccccggggcccgtccagatcccctccccgaccgccagccaggacccgaacctgatctatcaagtcctatagaccctcagaccgggactctcctgacaacacagatccacacactcaagctgaacacgtatggaagctcattcctgacagaaaagatgatgataatgatgataataataataataataataataataataataataataataataataacaataataataataataataataataataataataatataaaggtctcacctcctggccttcacctgagctctcagcagcatcacagccttcatcaatggagagtttcctgttttaaagattttatagttatcgaactctttctgctgaagactgaaacacagtccaacgctccagaaccagaatccagaactggttcagatctttactataaactattaatgttttcattcagtcttaattcaacagctgtaaaataaactaaggaatgaaaagattaaaatcctcgat
>ENSSAUG00010004893|myod1
atggagctgtcggatatctctttccccatccccgccgcggatgatttctacgatgacccctgcttcaacaccagcgacatgcacttcttcgaggacctggacccgcggctggtccatgtgggcctcctgaagccggacgactcctcctcttcagtttcaccctccccttcctcctccgcatcctcctccccgtcatctctgctgcacctccatcaccacgcagaaggggaggacgacgagcacgtccgcgcccccagcgggcaccaccaggcgggccgctgcctgctctgggcctgcaaggcctgcaagaggaagaccaccaatgcggaccggcggaaggcggccacgctgcgggagcgccggcggctcagcaaagtcaacgacgccttcgagaccctgaagcgctgcacgtcggccaaccccaaccagcggctgcccaaggtggagatcctgcgcaacgccatcagctacatcgagtccctgcaggcgctgctgcgcggcggccaggacgacggctactacccggtgctggagcactacagcggggactcagacgcctccagcccccggtccaactgctccgacggcatgacggactttaacggaccgagctgtcagtccaacagaagaggaagttacgacagcagctcttatttctctgagactccaaacggcggtctgaagagtgagcgcagctcggtggtctccagtctggactgtctgtccagcatcgtggagcggatctccaccgacaccagcagcctgctgccggccgccgacggccccgccgcggccccggggcccgtccagatcccctccccgaccgccagccaggacccgaacctgatctatcaagtcctatag
>ENSSAUG00010003494|igf2bp1
agagagaggaaaacattttcccgatctgatcccgccatagtttttcccactcttccaccacagacccatcaccaaatccatccagtacaacccacctcctccacagtgcgatagagaggctataggctgctgctttattcgtctgctggggccgggctgcaagtcaagggattcatttctcctcctgctccacttattctactggatttacggctaaattcaacgttaccatctggttttacacttctaaaatctctttttttttattttactttcctaacgagaatttacgtttcttccgttctgtgtttctttaaaaatatttttgagatattcttgccctctagcgagatttccactttcagttagtgtgacactatcttgttgcgctattagcagattcaggagataaactttttttcgctgggttaaattctagcatttccgggctttgttttttttttcttcgttttttggacttggaaaaacaatttccaccatgcacaagctatacattgggaatctaagcgacaacgtgactgctgaggacttagggaaaacctttgacgaccacaagatcccatactccggacagtttctaatgaaaaccggctatgcgtttgtggattgtccggacgatcagtgggccatgaaggctatcgagacgttttctggtaaagtggaacttcaggggaaacgtattgaagtcgagcactccgtccccaaaaagcaaaggaccaggaaattgcagatcagaaacattccacctcacttgcagtgggagtctctctttttcctatttctctcagtgaacacagagagtgagactgctgtggtaaatgtcacatatgcatcccgggagcatgccaggcaagccatccagaagctgaatggttaccagtttgagaacaatgccctgcgtgtctcctacatccctgatgagaactctgagctggagggaagccagagggggtccgattatggccgtcgacctggctatggctcccgagctcagcacgtagacatccctctgagactgctggtacccacacagtacgtcggtgccatcattggcaaggagggagccaccattcgtaacatcaccaagcagacagcgagcaagattgacgtgcatcgcaaagagaacgcaggtgctgctgagaagccgatcagcatccactccacccctgagggctgctcggccgcttgccgcatgatcctggacatcatgcagcaggaagctaaagacaccaagactgctgatgaggttcctctaaagattctggctcataataactttgttggacgcctgattgggaaggagggacgcaacctgaaaaaagttgaacaggacacagacaccaagatcaccatctcacctcttcaggacctgacactgtacaatccagagagaaccatcacagtcaaaggcccgattgaagcctgctgcctagctgaggtggaggtcatgaagaaggtcagagaggcctatgagaacgacatcgctgctatgaatgtgaccttattctctccagctccagaacaggagactgtccacgtatacatcccagcacaggcagtgggagccatcattggaaagaaagggcagcacatcaaacagctgagccgcttcgctggggcctccatcaagattgccccagctgaagctccagactctaaaatgaggatggtgattgtgacaggaccccctgaggcccagtttaaggctcagggcagaatttatggcaaactgaaggaggaaaacttctttggaccaaaggaggaggtcaaactggagactcacatcaagatggctgctgccgctgcagggagggtcattggcaaggggggcaagacggtgaatgagctccagaacctgacagcagctgaagtggtggtccccagggaacagacaccagatgaaaatgaccaggtcatcgtcaagatcaatggacatttctacgcaagccagttggctcagagaaagatccgggacatcctgacccaggtcaaacagccacagaaaggtgggatgggcatgggctctggctcaaacccccagggcttcacagagatgggcagccctacacaaggactgactcaggatcaacagccacgcaggaagtgagggtacccccaacctcctcacatgccgtgggccccccaacacctgacggacagacggatagacacatgcacggacggatagacagacgaatggacggacacaggagagcgacacacggacccagcgatagacagggagagatataaagagggagggagtacgcccgatagccagagagaaagatcagagtttagagagaaagagaggagatgaataaaatcacaacgaagaaatgaattaaaaaagag
>ENSSAUG00010002897|wnt3a
gaggaaacggcgtttcaaactcagtggtgcggccggtttgatcgactaccagggccgtgaacacaacacagtgagggcagagcaatctaaagataaaaaacttccttcatttcgtcttaattcgtgatgacaggagcattcaagtcactgttttaaatttcgtgacggaaagcctaaaaaaaaaagtttgttttcatctttacaatttaaatattaaataaatgcaatatattgtcagattgttaggagaaaacaaatctaatagttttcttcttttttcagtttgttgtggatccacagggggaaaaaaaaaaaaacctcctcagccctctacttttacattcatggcaaacaggcacaaataaaaggagcgcggaccttaataatggtctcaagcaattcacacatatttatttctgcattttagaagcttcaagccagggagtgaaatccggacaggttgttatagctacgcgatccacaggggttccgatgtctatttaaaacccttcggaccctccctctctcctttaaacaacattatatatcacactcgctgcatgctaatgcgaaccaattctcaatgagcactaaaacacatcttaaaattagctcattctggctgtctgagttcaaactgcctgactaagcaacagagggaacatatcatcagaaattccccctttggcgatacctgctgattgggtccttaaaaaaaaaaggaaaaaaaaggcagcaagcagcttttaacttttaatatttggctcccgagttctgccgcgagcagtcgcgacagatagatcctccctcagtttatgtggaggatcgaacaaatatatatatataaatccatcaaggcagattctctcttttttctttttctttttttttttcctcctttcttcagttaaaatctcagtgcgcgtctgagcgcgcatgcaggcttttctactggagagggcttttttttgcgaaacttttaaggatgatataccttggatgtttcctgctgctctgtgggctcacgcatgtcatggcaagttatcccatctggtggtcgctagcagtgggccaccagtactcctcactgggaactcaaccgatcctctgcggaagcatcccgggtctggtgcccaagcagctgcgcttctgccggaactacgtggagatcatgcccagcgtggccgagggggtgaagattggcatccaggagtgccagcaccagtttagaggaagacgctggaactgcaccacggtcaacgacaatctggccattttcggaccagtgttggataaagccactcgagagtcagcatttgttcacgccatcgcctcggcgggagtggcgttcgcagtgacccgtgcctgcgcagagggtccagccaccatctgtgggtgtgacacacctcacaagggcccccccggtgagggatggaagtggggtggctgcagcgaggatgtggagtttgggagcatggtgtcccgggagtttgctgatgcgagggagaatcggcctgatgcgcgctcagccatgaaccgtcataacaatgaggcaggaagaatgtccctcaatgacaacatgttcctgaagtgtaagtgccacgggctctcaggcagctgcgaggtcaagacgtgctggtggtctcagcctgacttccgagtcattggtgactacatgaaggataagtacgacagcgcgtcggagatggtggtggagaaacacaaggagtcccgcggatgggtggagaccttaagacccaagtacaactacttcaaaccccccacagagcgtgacctggtttactacgagagctcacccaatttctgcgaccccaaccccgagaccggctccttcggcacccgcgatcgcatctgcaacctgacgtcccacggcatagacgggtgtgacctcctctgctgtggcaggggtcacaacaccaggactgagaagagaaaggaaaagtgccactgcattttccactggtgctgctacgtcagctgtcaggagtgtgtgagagtctacgatgtgcacacctgcaaatgaagacgcctggttctcgtctttgctcaccaaaactgaaagacttcagtaggcatgagaacaaatacagcaactttgagagactgtaaggctgcctgagctatcaaggactccagcggcagacgtaacagtcttgtgtttttgtgtcgtgatgctagaaagagcccgtctttgcctcgatcagctgaaaagtagatgttgacatcgtccatatgaactgcaacaatgatgctgatgatgacaacaatgttgatatctctagcgatgagttttcatgtactgacgtagaaaaggagaactgtcggctaattgacgaacaccatattggtgattttttttttgttgtctctgtgctccacgtagttccttttgttgagattagtccagtactgccaatgctttcaagtctgtgtggcaaacaatgaaagtgtcacattttcttcaatgtttaatcatccttcgttttttgccacaacaagatttatgagctatttacatgatcagacactcaacagcatgcattctcctcctcaacggtataagtatgtatctaaaaactaacattatcgtgtgaatgggttgtgtttttttattttttatagtgttaatatgttactgatgtttgggtaagaatgcacttgcacctgagtgaatgtaattgttatgctgcaatgtgtttacatgttctccaatccttaagctaacaagctaatatctgccacaactaactttatccagagagtagacatgagccacattcgctgaacaagaacacacgcggtccgcacactttccagaaacacccgagaacaccggaagcttttttcttcagagtaacaacgcttcggatgacatggagagttatgaccaaagacgagaacagaaaacctgctgtaagtccctggaggtcagacaacccaatcgccagaataaatgtcagctaagtgcatttatgca
>ENSSAUG00010002312|PAX7
cctggtgtgctgtgcaggcaggcagatgtgctggtgtggaggctgcagagcctattgtctatgttagagacctatgacgagtttcagtgtgagtgggttgtgaatctctctctctctctctctctctctctctctctctctctttctctgtgtgtgtgtgtgtgtgtgtgtgtgtgtctttatcccttcattcccattggctgctgaaacttggtggagcttttccctcccgagtaagagaaagcctcaagaacctatcggtgctcgcgacccgtccccccttctcgagcccgcctggtccagacttgtccaggggaccgtcagatgagtccttcacaacggttaaataagctggtgtcagagacagacgcttccatacagtgaacacatgaacagtgtgaggactccatgagccctgtcagcctgactgcagtggaggtctcatattgatcttttcatatttttttctcatccatcacacaccggagcgctcacacatttccacctctgaaacacttgtagcaacacatcgacacgtgatttggacatccagacagctttcggtctttttttgcctttttttttttgtatctctccttttttttttttttttttttttttttttaaatgttacaatgtcgtctttgccaggaactgtaccgcggatgatgcgcccggctcccggacagaactacccccggactggattccctctggaagtgtccactcctctgggccagggacgggtcaaccagctcggaggtgtctttatcaacggccggccgctgcccaaccacatccgacacaagatagtggagatggcccaccacgggatccggccctgcgtcatctcccggcagctgcgggtctcccacggctgcgtctccaagatcctctgccgctaccaggagaccggctccatccggcccggagcgataggaggcagcaagcccagggtagccacgccggacgtggagaagcggatcgaggagtacaagcgggacaaccccggcatgttcagctgggagatccgggataagctgctgaaggacggcgtgtgtgacagaagcacagtcccttcaggtgaggcctcctctgtgagttcgatcagccgtgtacttcgggctcggtttggaaaaaaggacgatgaggaggagtgtgataaaaaggatgaagacggagagaagaaaagcaaacacagcatcgacggcatcctcggcgacaaaggcagtcggatggacgaagtgtcagatgtggagtcagagcctgacctccccctcaagaggaagcagcgcaggagtcggaccacattcacagcagagcagctggaggagttggagaaggcttttgaaagaacccactaccccgacatctacacaagagaagagctggcccagaggaccaaactcactgaagccagggtccaggtgtggttcagcaatcgaagggccagatggcggaaacaagcaggagccaatcagcttgcagcatttaaccacctgttgccgggtggatttcctcccacggggatgccaacacttcctacataccagctgccagattccagctacccaacaaacactctgccccaagatggtagtggtacagttcaccgtccccagccgttacctccatccaccatgcaccagagcggtctctccagcacagacagcagctctgcctacggtatcgcctccaaccgccatggcttctccagctactccgacacctttatgagctcttccgcaccgagcaaccatgtcaaccctgtcagcaacggactctccccacaggtaaacctgctggactactgtgacatttatgtctgtggatcaagtaaagtagaaagaactagctcctgtttgcagttagtgatgagcattctgagtaaccccagcggtgtttcttcacagccacagcacgacttctccatatcaccactccatagtgccctggactcctctccatccaatgccatctcagcgagctgcagccagcgatcagctgagtcttccattaagacggtggacagccttccgtcatcgcagtcctactgcccccctacatacagcaccaccagctacagcatggatcccactgtggctgctgccggttaccagtacagtcagtacggccagactgctgtggattatctggcgaagaacgttagcctgtccagtcagcgcaggatgaagctggctgaccactcagctgtactgggactgctgcaggttgagactggccaggcctactag
>ENSSAUG00010004791|mstnb
tcattgttgcctattgtgctctatcttagcttgctgattgttttgggtccagtagttttgagcgaacaagagacgcagcagcaacaacaacagcagcagcagcagcagcagccctccgccaccagcccagaagacacggagctgtgcgcaacctgcgaggtccggcagcagatcaaaaccatgcgattaaacgccataaagtctcagattctgagcaaactgcgaatgaaagaggctccaaatatcagccgggacatcgtgaagcagctcctgcccaaagcgccgccgctgcagcagcttctcgaccagtacgacgtgctgggagacgacaacagggatgtggttatggaggaggacgatgagcacgccatcacggagacgattatgatgatggccactgaacctgagcccgtcgtccaggtggatggggagccgaggtgctgctttttctccttcactcaaaagattcaagccaatcgaatcgtacgagcgcagctctgggtacatctgcgcgcgtcggacgaggcgaccacggtgttcctacagatctcccgcctgatgccggtcacggacgggaacgggcacatacacatccgctccctgaagatcgacgtgaacgccggggtcggctcgtggcaaagtatagacgtcaaacaagtgttgagcgtgtggctgcggcagccggagaccaactggggcatccagattaacgccttcgattcgagggggaatgacttggccgtgacctccgcggagcctggagaggacggattgcaaccgttcatggaggtgaagatttcggaggggcccaagcgtgtccggagagactcgggcctggactgtgacgagaactctccagagtcccggtgctgccgctacccgctcacggtggacttcgaagactttggctgggactggattattgccccaaagcgctacaaggccaactattgctccggggagtgtgagtacatgcacttgcagaagtacccgcacacccacctggtgaacaaagccaaccccagagggtccgcgggcccctgctgtacccccaccaagatgtcgcccatcaacatgctctactttaaccgaaaggagcagatcatctacggcaagatcccctccatggtggtagaccgttgtggatgctcttgagtcgggagggagatctcggcgaggtcggacggctcggtccgggcctccagttttcagactttttgacacaaccgatccaccagttccagtgcttctcctgcagcaacacagtgcaatagaaaccagagtagaggccacaatcaagcccgaccttcccgcagggcagcgctgctttcacatccggcacagctctcaccttttttctttcctcctgtgaaatcttagctcgaagtcagatggatgcaggaacacacacacacacacacacaaacacacacaaacacacatgccggaccttgggagtgaatgtagatagaaattattatccagaaaacttttctcgtccttcgtcgtctcggtgttctgcgctctgtccatttatacaaaacatgccgacagattatactcgtacgccatctccgatcgtagccgacatgcaagctattacacttttttctgctaagctatgtgtttgtgataatcatttgttcaagttatgtttttaagagtgaaaccaggaatcctcatggactttttgaaagggcttgggaaaaacacagctgggggactcttgagcgtggtacttcacactggtagaacatgtttttaggacaacgtaggagttgatgaaacgatcaaaaccctaattcctaactagaaattaccacatcaaccaatttggaaactccttcctgtatcagacgagcttaacatctcatttagttcttcgattaacgacaccgggaacttcaggttcaggttttcaacgtgccggtcgatcatgttccaccagggtgaagtagcacgactttaggtcttgacaggtcttcatatactctcgccatacatccacgcaacaacatacccgacggaggagcgtcctcgctcagtcacaatcatcactatccaaca
>ENSSAUG00010005040|mapk1
gtccatccatccatccatttatccattgtctgtaaccgttttatcccttttatggggtctctggggttgttgcgggagcaacatccaagctgtctctgggcgagggttagggtacaccctggacaagtcgccagctcatcgccacgcaaggtgccagccgcacatcaggagcaattttgatttcagtatcttgctcaaggacacttcgacatgcagctcagctcagcccgcagctgggatttgaacctgggattataacactatatataataactgttacatttgtatgcagctaatcaataaatgcaatactttatgtagcctacattttttctgattatatctgtagcatcattcttcagtgcggcacttttacttataatggagtactttcacagtgtgggaataagtacttttattgcagtgaaggatctgagtacttcatccacctctcactggatctaacaccttactgtttggtttattctattctactatgtagaagcagtacctgaaagcgacactggtcatcccaaaagaacagaaagaagaagggaaagaaaaaaaggaaaaagagaaaacaccggatcacatgaccgccttcgttatttcctgcagcagcagcggcagcctctccgctcctcgccctgcctgcctgcctgcgacagcacagcagtggtgtggtcgcgctgaacgcacgctaacggaaggaaaaaacactccacacgtagtgaaggcctctgccaaactgaaagctctgtttcagtcacagcgacgacggatataaactgacacacacatatatattttttttctaatctcagtcgctctttttttatttggtagcgttgtaaaaggccagtcctcataatggcgacagctgcggtgtctgcccctgctggctgcggccccagccccgggtcgggaacggagctggtccgcgggcaggccttcgacgtcgggcctcggtacagcaacctctcctacatcggggaaggagcctacgggatggtgtgctctgcctatgaccgagacaacaagatacgtgtggccattaagaagatcagcccctttgagcaccagacatactgccaacgtaccctgagagagatcaaaatccttctgcgcttcaaacatgagaacatcatcggaataaacgacatcatccgcacaccaaccattgaccagatgaaagacgtatatattgtgcaggatctcatggagacagacctgtacaagctcctgaagactcaacacctgagcaacgaccatatctgctacttcctctaccagatcctacgagggctcaagtacatccactctgccaacgtcctgcatcgcgacctgaagccttccaacctcctgcttaacaccacctgtgatctcaagatctgtgattttggtttggctcgcgtggctgatcctgaccacgatcacactggcttcctaacggagtatgtagccactcgttggtaccgagcacctgagatcatgctcaactccaagggctataccaagtccatagacatctggtcagtgggttgcatcctggctgagatgttgtccaacagaccaatttttccagggaagcactacttggatcagcttaaccacatattggggatcctcggttctccctctcaggaggatctcaactgcatcatcaacgtcaaggccaggaactatcttttgtcacttcctttgcgctgcaaagtgccgtggaaccgccttttccccaacgctgatcccaaagctctggacctgttggacaagatgttgacctttaaccctcacaagaggatcgaggtggaggcggccctggcgcacccctacctggagcaatattacgacccaacagatgagcctgttgctgaggccccattcaagtttgacatggagctggatgacctacccaaagagacactgaaggagctcatctttgatgaaactgcacgtttccagcgtgcctttaggtcctaacatttcacatag
>ENSSAUG00010002541|jag1b
agctgtttgtgtgtgcgcgcgcgctttgtttggttttgtttttttccgttgcactcatttcttctgtcctctcaacaggtgtcagagggatccggacaattcgagttgcaaatcttatcgatgcacaatgtgaacggagagctgttcagcggcatgtgttgtgatggctcgcggaccacggcggatagaaaatgcacgcgggacgagtgcgacacgttttttaaagtttgcctgaaggaataccagtcgagggtttctgctgcagggccctgcagcttcggaatgggatctacgcctgtcctcggagggaataccttttctttcaggagctcagtcaggaatgacaaatcccggatagttttgcccttcagttttgcctggccgaggtcctacactttgatagtggaagccttggacttcaacaatgaaaccaatgggaagctgattgagaaagcctctcattccggcatgatcaaccccagcccgcattggcagaagctgacacacaacggcccggtggctcagttcgagtatcagatccgggtcagctgcgacgagcactactacggcttcggctgcaacaagttctgtcggcccagagacgagttctttgggcattacacgtgtgactataacggaaacaagacctgtctggaaggctggtctggacctgactgcaacacagcgatatgtagacaaggctgcagcactgaacatggattttgtaaggagccagggggatgcaagtgtctgtatggctggcagggccagtactgtgacaagtgcatccctcaccctggctgtgtacatggcacctgtgtagagccatggcaatgcctgtgcgacaccaactggggcggccacctttgcgataaagatctgaactactgtggcactcaccagccatgcctgaatggagggacatgcatcaacacaggacctgacaagtaccaatgtacgtgtgctgagggctactctggtgccaactgtgagagagcggaacatgcctgtctgtccaatccatgctccaatggagggagctgttcagaaaccagccaaggttatgaatgtcagtgtgcgccaggctggagcggcccctcctgcaccatcaacattgacgactgctctccaaacccctgtaatcacggaggaacctgccaggatctggtgaacggctacaagtgtcactgtccttcacagtggacgggaaagacgtgtctgatagatgccaacgaatgcgatagcaagccttgtgacaatgccaactcatgccgcaacctgattggtggatacttctgcgagtgcatccctggttggatggggcagaactgcgacatcaatataaatgattgcaaggaccagtgccagaatgggggaacttgcaaggacttggttaatggctatcattgtgtgtgcccccctggcttcgctggcgagcattgcgagagggacatcgacgaatgcgcgagctcgccgtgtctgaacggcgggcgctgtcaggacgaagtgaacagcttccagtgcctgtgtctggctggcttttcaggaaatctgtgccagctggatatcgattactgctccccaaacccgtgtcagaacggagccccctgcttcaacctggccacggactactactgcgactgccccgaagactatgagggcaagaactgctctcacctcaaagaccactgtcgcaccaccacatgtaaagtgattgacagctgcactgtcgctgtggcgtctaacagcacaccaggtggggagcgctacatttcatcaaatgtgtgcggaccccatggtcagtgtcgcagccaggccgggggtcagttcagctgcgagtgtcaggagggcttcagaggcacctactgccatgagaacatcaatgactgtgagagtaatccatgcagcaatggaggcacctgcatcgacaaagtcagtgtgtaccagtgcatctgccgcgacggttgggagggcgaccattgcgagatcaacatcgatgactgcagcaccagcccctgtcataatggagggacatgtcgagacctggtgactgatttcttttgcgagtgcaaaaatggctggaagggaaagacgtgccactcccgtgaaagtcagtgcgatgaggccacatgcaacaatggtggcacctgccacgatgagggcaacacgttccaatgcaagtgttccccagggtgggagggtacaacatgtaacatagccaaaaactcaagttgtcttccaaacccgtgtgagaatggaggtacctgtgtggtgactggagagtcgttcacctgcgtctgcaaagaaggatgggaaggtcccacgtgcacccagaataccaacgactgcagtccccacccatgctacaacagcggaacctgtgtcgacggggataactggtaccgctgcgagtgtgcctcaggcttcgctggtccagactgtcggatcaatattaacgagtgccagtcctctccatgtgcctttggctctacctgtgtggacgagatcaacggatatcgctgcctgtgtccaccagacaggactggaccccactgccaagaagtgacaagaaagcattgctctgtgaatggacacgtcacccctgatggagtcaaatgggacgaagactgcaacacttgccactgttccaatgggaaagtggtgtgcacaaagatgtggtgtggtcctacatcgtgccacctgggtgccaaaggtcgaggcgggtgtccttcaggccaaaactgcatccccatcagagagggccactgctttgtgaagccctgcctcgttttcggcgagtgctggcgctccaaccctcccccgcctcccaccaaatgccaccccagctccagttaccaggacaacagctgcgccaacatcaccttcaccttcaacaaggagaccatgactcaaattaggttttcacttgtgctcaaccatcgctccttgtctgagactactgaacaattcagtcacatctccaaacgtgttccaggaagaaaaaatgtgggaatatctctgtcttctctctctgttttttttcctcctcccactcccagtcagccatatgtgtactaccttgtgccactcctcagctccatcttcatcgtcatctgggtgctcgtgctcgtcagcattttgctgtggtgcatgcggcgacggcggaaacagagcaaccataacgggacgacggccgccggctccgaggacaacacgaccaacaacgtgcgggagcagctgaaccagatcaagaaccctatagagaagcacgtgggcctcactgtggccatcaaagactatgaaaacaagaactccatcattgccaaaataaggacaaatcatcccgagggggatgaggacgacaaggagaggcacttacagaagggccgctttgccaaacagccagcatacacactggtggagagggacgagaagacgcccatctccaatcccaactccacgtccaaaaatcctaattggactaataaacaggacaacagagacttggagacagcaaacagcataaacaggatggactacattgtatag
>ENSSAUG00010004893|myod1
atggagctgtcggatatctctttccccatccccgccgcggatgatttctacgatgacccctgcttcaacaccagcgacatgcacttcttcgaggacctggacccgcggctggtccatgtgggcctcctgaagccggacgactcctcctcttcagtttcaccctccccttcctcctccgcatcctcctccccgtcatctctgctgcacctccatcaccacgcagaaggggaggacgacgagcacgtccgcgcccccagcgggcaccaccaggcgggccgctgcctgctctgggcctgcaaggcctgcaagaggaagaccaccaatgcggaccggcggaaggcggccacgctgcgggagcgccggcggctcagcaaagtcaacgacgccttcgagaccctgaagcgctgcacgtcggccaaccccaaccagcggctgcccaaggtggagatcctgcgcaacgccatcagctacatcgagtccctgcaggcgctgctgcgcggcggccaggacgacggctactacccggtgctggagcactacagcggggactcagacgcctccagcccccggtccaactgctccgacggcatgacggactttaacggaccgagctgtcagtccaacagaagaggaagttacgacagcagctcttatttctctgagactccaaacggcggtctgaagagtgagcgcagctcggtggtctccagtctggactgtctgtccagcatcgtggagcggatctccaccgacaccagcagcctgctgccggccgccgacggccccgcgtccccgaccacacccccgtccggcgaggccgcggccccggggcccgtccagatcccctccccgaccgccagccaggacccgaacctgatctatcaagtcctatagaccctcagaccgggactctcctgacaacacagatccacacactcaagctgaacacgtatggaagctcattcctgacagaaaagatgatgataatgatgataataataataataataataataataataataataataataataataacaataataataataataataataataataataataatataaaggtctcacctcctggccttcacctgagctctcagcagcatcacagccttcatcaatggagagtttcctgttttaaagattttatagttatcgaactctttctgctgaagactgaaacacagtccaacgctccagaaccagaatccagaactggttcagatctttactataaactattaatgttttcattcagtcttaattcaacagctgtaaaataaactaaggaatgaaaagattaaaatcctcgat
>ENSSAUG00010002312|PAX7
cctggtgtgctgtgcaggcaggcagatgtgctggtgtggaggctgcagagcctattgtctatgttagagacctatgacgagtttcagtgtgagtgggttgtgaatctctctctctctctctctctctctctctctctctctctttctctgtgtgtgtgtgtgtgtgtgtgtgtgtgtctttatcccttcattcccattggctgctgaaacttggtggagcttttccctcccgagtaagagaaagcctcaagaacctatcggtgctcgcgacccgtccccccttctcgagcccgcctggtccagacttgtccaggggaccgtcagatgagtccttcacaacggttaaataagctggtgtcagagacagacgcttccatacagtgaacacatgaacagtgtgaggactccatgagccctgtcagcctgactgcagtggaggtctcatattgatcttttcatatttttttctcatccatcacacaccggagcgctcacacatttccacctctgaaacacttgtagcaacacatcgacacgtgatttggacatccagacagctttcggtctttttttgcctttttttttttgtatctctccttttttttttttttttttttttttttttaaatgttacaatgtcgtctttgccaggaactgtaccgcggatgatgcgcccggctcccggacagaactacccccggactggattccctctggaagtgtccactcctctgggccagggacgggtcaaccagctcggaggtgtctttatcaacggccggccgctgcccaaccacatccgacacaagatagtggagatggcccaccacgggatccggccctgcgtcatctcccggcagctgcgggtctcccacggctgcgtctccaagatcctctgccgctaccaggagaccggctccatccggcccggagcgataggaggcagcaagcccaggcaggtagccacgccggacgtggagaagcggatcgaggagtacaagcgggacaaccccggcatgttcagctgggagatccgggataagctgctgaaggacggcgtgtgtgacagaagcacagtcccttcagtgagttcgatcagccgtgtacttcgggctcggtttggaaaaaaggacgatgaggaggagtgtgataaaaaggatgaagacggagagaagaaaagcaaacacagcatcgacggcatcctcggcgacaaaggtaggtcagaggacacactgtgtgagtttagacttttcttagatagatattttacattgtga
>ENSSAUG00010004236|lrp1bb
gtcgcctgccttcttctggtagattttaatcaagccatcttgtgtgacattggggagtttcactgtcacgacgaggagacctgcatccccgaggcctggctctgtgaccaagagcccgactgccccgacgactccgacgaatctgacagactttgtgcacaagaggtggtgatcagatgtcccctcaaccacatacagtgcatcgggacaaaaaaatgcatccacttcaacaagctgtgcaacggggcgaaagattgcgacgacggctacgacgaaggagtccactgtcgagagctcctgtcagcctgccacgagctccggtgccgctacggctgcgtcatgacgagaaacggcaccttctgtttctgtgctgacggctttgaggtcggcgaggacgggacgagctgcagagatcatgatgaatgtgccatgtatggcgcgtgcagccaaacctgcacgaacacctacgggtcatacagatgcagctgcacggaaggatacatcctgcagcccgacaggagatcttgcagagcaaaacaagatcctggtgacagccgtccaatgcttctcattggtggctcggatcgtattgtcatcacccatctaaatggaacaggcctccagcccctgaggtctctgagtgtaaatggaacactggcattggatttccagcacaaccaggaaagtgtatgctgggttctgtcgacagagtcctctgggcaactccgctgtgccgaaacgaggaatctgcgcggattcacacgggaacgggaaataagaacacaacaaagtttgcagcatgtggagcacctagctatcgactggctaacaggcaactactattttgttgaccgcgtcacggacaagatatttgcctgtaaccacggaggggacacgtgtgttactatcctacaactagacctgctgaatcctaaaggaatagctctggatcctctcatgggaatgctcttcttcactgactatgggaacgtagccaaggtggaacgctgcaacatggacggcactaaccggactcggctggtggattataaaattgagcagcccactgctgtggcattggacgtggtcaagaagctggtgtactgggcagacgcctacttggattacatcgacgtggtggattacaacggcaggaacaggcacaccataatccacgggagccaagtatcgtatatttattcattagctttgtttgaggactacctctatgctacccactctgacccttccaaagggagttcctctgtggagctgctgcagatccacaggttcaacatcacagaggacagcaggatactagccagcctgggggatactaaaagactcttcaggagtcacgcatgtgaaataggctcatacggaaagccgggcggatgttcccatatctgccttctgagtggcagctacaagtccagaacctgccgatgtcgtactggctaccgtctgggctctgatgggcagtcctgtaaaaagcccaaaaacgatctcttcctgttctacggtaaggggcgccccggggtcatccgaggcctggatatgaacatcaagtccagtgacgagcacatggagccaatcgaggacctggtcaacccccgagccatcgactactacgcggaattgggacacatctactttgctgacaccaccagtttccttattgggcggcaaaaaatagacggaagcagccgagagacaattctcaaagatgaacttgacaatgtcgaagggatctcagtggactggatcgggaaaaacttgtactggaccaacgatggctacaggaagacaatcagcgttgccagactggagagagcctctcagacccggaagactctgttggaagggaatatgtcacacccaagggccattgttgtcgaccctcttaacagctggatgtactggacggactgggaggaggacgaagtcaacgacagcatcgggcggatagagaaagcctggatggacggatccaaccgcctcattttcgtcacctccaacatgctgtggcccaacggcctaacgctggaccacagcaccagcaccatgtactggtgcgacgcctactacgatcacatcgagaggattcatctcaacgggaccgggaggatggtggtgtacaacgggaaagagctgaaccacccgttcgggatctctcatcatcgcaatttcatcttctggacggagtacatgaacgcctccgtctttcagctggacctgtccaccggtgatgtcactctgctgcggagcgagaggccgccactgtttggcctgcgtgtctacgacgcacagagtcagcaaggtgacaacgcgtgcagtgtgaattatgggggctgtggtaccctctgccttgccatcccaggaggcagagtgtgtgcctgcgctgacaaccaggttctggggaagaacaatgtcacctgtccacagcgatgtaagagtgatgagttccagtgccacaaccagcgctgcatacgagccctgtggaagtgtgatggagatgatgactgtctggatggaagtgacgaggagagccacagctgctacaatcatacctgccccactgatcagttcaaatgcaacaacaatcgctgcattccaaaacgatggctttgtgacggaacaaacgactgtggcagcaatgaggatgaggccaacagtacatgctcagcccagccctgtcaggccgaccagttctcctgccagaatggacgatgtatacctcgagcctggagctgcgaccgggaggatgactgtggggataagtctgatgaaatatcatgcaccttccccacctgtgagcccctcacccagttcagctgctccaacgggcgatgcatcagcgtgcagtggcattgtgattcagacgatgactgtggagacggcagcgatgaagtgggctgcgtccgctcctgctccaacaaccagtttcagtgcaccagcggccgatgcatccccgaccactgggcctgtgacggcgataacgactgtggagacttcagcgacgagaacacgacctgcagaggtggttcagcacgtaagaactgcagcggggaggaattccactgcgtcgccgacgggacctgcatcccggaacgctggagatgcgacggagacaaggactgcgaggacgggagcgacgagaaagactgcgagggcaccaagaggatgtgcgaccccaaggccaaatttacctgcaaagacacaggcaagtgtatcacaaagagctgggtgtgcgacggggacatcgactgcgaggaccgctccgatgaagagtcctgcgagtccgctgtgtgcaagccacccaagtacccttgtgccaatgacacctccgcgtgcctcacgcccgataagatctgcaacggcaaagtggactgtgcggatcgctcggacgaaggagccatctgtgatctgtgtcttgtagccagagggggctgcagtcaccagtgcaccgtggcaccggggaaaggggttgtgtgtttttgtccccctgggcttcacctggactccagcaacaagacgtgtgaggtggtggactactgcagccgccacctaaagtgcagccaggtgtgtgagcagtacaagaccacggtgaagtgctcctgttacccgggatgggagctcgacccagatggagacagctgtcacagcacagatcccttcgaggctttcatcattttctcgatccggcacgagataagacgaatagaccttcataagcgggactacagcctgctggtgccggggctgaggaacaccattgcactagacttccactttaatcgcagcctcctttactggacagatgtggtggaggataagatctacagagggaaactctccgagtcaggcggtgtgacaggtattgaggtggtcgtgcagcatggtctggccaccccggagggcctggctgtggattggattacggggaaactgtactggatcgacagcaatctggaccagatcgaggtggccaagcttaacggagatatgcgcaccacgctgatcgccggaggcatggagcatccacgggccatcgctctcgacccgggacaggggtacgttatgatcctcttctggactgactgggacgcgactttcccccgaatcgaggccgcggccatgagcggaggaggtcgacacatcgtgttcaaagatatggaaatcggcgcttggcccaatggactgactctagatcatttggagaagaggattgtttggacggatgcacgctccgacgccattttctcggcactctatgatggaagtggggtcatcgagatcctcaggggccatgaatacctgtcccatcccttcgccgtgtctctctttggaggcaatgtctactggacagactggcggacgaacactttggcgagagccaataagtggacagggcaaaatgtcacagtcatccagaagacgagcgctcagccatttgacttgcagatcttccatcccagcaggcaaccacaagcctccaacccatgtgaagggaatgatggacgtggtccctgctcacatctgtgcctcatcaattacaaccgcaccgcgtcctgcacctgtccgcaccttatgaagctctcacccaacaaacaatcctgcttcgcgctgaaaaggttcctcctgtacgtgcggcggtctgaaatccgcggcgtggatgtcgacaacccttacatgaacgtcatgacggcgctgacggtgccagacatcgacgatgtcacggtggtggactacgacgcgctggaggagaggatctactgggctgacatcaaaacccaaaccatcaaaagggccttcatcaacggcacccaactagagaccattatctccgcagacatcgtgaactgccgcggtctggctctggactggctttccaggaacttatactggctcagcgctgaaaacgacgagtcgcaaatcaatgtggctcgctttgatggctccctgaagacctccatcatccacggcattgataagccaaggtgccttgtagtgcaccctgccaaaggaaaaatctattggacagatggcaacaccattaacatggccaacatggatgggagcaacagcaaggtcctccaccagaatcagagggaccctgtaggtctctcaattgactacactgccaacaggctgtactggatcagctcggccaacggcactatcaacaggtgcaatctggacggcagcgggatggaagtgctggagactctaaagagggagttagtcaaaggcacagctctggccgtgatgggaggcaaattgtggtgggcagatgaagaatcggcacagctgggaacggttaccaagagagacggccggaaccctgtgatcctgagaaacaagacgagcggggtcgttcacatgaaggtgtacgacagggagggtcagaaaggtaaaaacccgtgccagataaacaacggcggctgctcacagctctgcttccccacttctgagaacacccgcagctgctcctgcactgttggctacaacctgcgtagcgaccgcatgtcttgcgaaggtgtcgattctttcctgatgtactccatccatgagggaatccggggaatcgcgctcgacccaaatgacaacagcgaggctctcatgccaatcacggggacgctgtttgctgtgggagttgactttcatgcaggaaatgacaccgtgtactggacagacatgggcctgaacagaatatcccgagccaaacgtgatcagacctggcgggaggacatcattactacaggcatcagtcgggtggagggcatcgctgtcgactggattttgctgttttttttctgcacagggaacctgtatctgttctggaccgaatggggccagcacccctgcatcggccgctcccgtctggacggttcagaccaggtaaccttggtcaactcaggcatcatgtggcccaacggaatttccatagactacgaggaaaatacattatactggtgcgacgcccgcacagataagatcgagaggataaaccttgagacaggtgagagccgggagattgtactgtcagtggccaacgtagaccttttctcagtggctgtgtttgggccctacatctactggtctgacagggctcattcaaacggctcgatccgacgtggcttcaaaactgacaccagcgaggctgtgaccatgaggagtggtctgggggtcaatctgaaggatgtgacggtcttcaataggggcagagaaaaaggcacgaacccctgcgccaggagcaacggcggctgccagcagctgtgcttccacctgggcagcggccgccggacctgctcctgcgcccacggtcgcttggcagaagacggctttgcctgcgagcgctacgaaggttatctgctctactccgagaggaccatattgaaaagcatccacctctcggacgagaacgacctcaactcacccgtgcagccgttcgaaaaccccgcttttttcaagaacgtcgtagccctggctttcgactacagtcagaagaccgccgagaccaaccgcatctttttcagtgacgtccactccgggaacatccaggtgattaacgatgactggacagggagatcgattatcgcggaaaatgtgggttcagtggagggcctggcctaccaccgggcctgggacaccttgttctggaccagctccaccacctccacgatcactagacaaactctggatcagacgcgagtcggtgccttcgagcggcaggccgtcgtcactctctcggaggaggaccatccacatgtcctggccctggacgagtgtcaaaacctgatgttttggaccaactggaatgagcagagacccagcatcatgagatccaccttggcgggcaagaacatgaggattatcatcagtactgacatcctgacgcccaatggactgactgtggaccacaaagcggagaagctctacttttccgatggaaccattggcaaaattgagagatgtgactacgacggttccagcagatacgtcataattaaatccggaccggggaacttctacgggctcgccatctacgcagatttcatctactggtcggactgggcccgcagagccgtgctgcgatccaacaagtacacgggtggcgacaccaaggtacttcgagcagatatcccccatcaacccatgggaattatcgccgtggccagggacacaaacaactgtgagctgtccccatgccgacacatgaatggaggctgcggcgacctttgtctcctgaccccgtatgggagggtcaattgcagttgccgtggagaacgtgtgctgctagacgacaacagatgtgtgtcagaaaattcctcctgcaacatccacactgaatttgagtgtgggaacggcgagtgcataaactaccaactaacctgcgacggaatagcccactgcaaagacaagtcggacgagaagatgcaatactgtgtcaacaggagctgccggaagggtttcaggccgtgctacaatcaacggtgtgtggccaacagtcgcttctgtgacggcatcgacgactgcggggataactctgatgaagctttctgtaatgtcacgtgcggctcatcagagtcatcgtgcaaggacgggagctgtgtacccagctcagcctggtgtaaccaggtcattgactgtgccgatgcctcggatgaaaaaagctgcaatcacacagactgttcccacttttacaagctgggggtgaaagaaaaagacttcatcggctgcaactccacctcactgtgcatccacccctcgtggatctgcgatggtgcgaacgactgcggagactacgccgacgagaccaactgccagggtgagcgcccgaagtgcgaggaaggccacttcgcctgtccaagtgggaactgcatctccagcgtgtggctgtgtgacggccagaaagactgtgaagacggagcggacgaattccagtgcgactcgtcatgcttgtggaaccagttcgcctgctcgaagaacaagtgcatcgccaaacaatggctgtgcgacggggagaacgactgcgaggacggcctcgacgagagcgtgcagatctgcggttcggtgacgtgcgctccagggctgttcagctgccccgggtcgtacgcctgtgttccgaagcgctggctgtgtgatggcgaacgggactgccccgacgggagtgatgaactctctgcagctggctgtgcacccaacaacacgtgcgatgacagctcgtttcactgcagcaacaaggcgtgcatccctcagcgattcgtctgtgaccacgatgacgactgtggagacggatctgacgagtcagtggaatgtgtatatcgctcctgtggatcagaggagtttcgctgcggggacggccgctgtctcctcagctctcagtgggagtgtgacggctatgcagactgtcccgaccactctgacgaactgcctctgaacctcaaatgcttggccgcaggaagcttgtgcaacggctccttcttcatgtgctccaacggacgctgcatctctgagaggaatctctgcgatggcagagatgattgtggagaccggtcggatgagaggaactgtaatgtgaatgaatgcctgaaccgccgtgtcagtgggtgcacacaggattgccaagatcttccagtgggatacaagtgtaaatgctggcctggattccacctgaaggatgatgggaagacctgcgtggatgttgacgaatgctcaactacccttccctgtagccagcgctgcatcaacacatacggctccttcaagtgcctgtgcgtggacggctacgaagccttggagcgcaaccccaacacgtgtaaagcactgtcagctgaagagcctttcctcattctggcggaccaccatgagatccggaagctgagcgtggacggctcaaattacaccatcttgaaacagggcctcaacaacatcatccacatagactttgactacaagaaggaattcatctactgggtggactcaaccaggccgaccggtcgaaagatcaacagaatgcgcctcaatgggagtgacctcaaggtcgtccacaaaacagcggtgcccagcgctttggcagtggattggattggaaaaaatctgtactggtgtgatgccgaaaagaaaacactggaagtgtccaaagccaatggcctctacccgactgtcctgatcagttctgcatattatcatcaagaagagggatggatttactgctgcgaacctcctcacattggtcgtattggcatggatggccgagggcaaacggttatcattgacacagagatctataaccccactgctctcactatcgattacaccaacaagaggctctactgggcagacgacaaccacatcctgctcgccaacatggacggcacccaaagacgcaaagtgtcctatgatcacatccaaggggttatggctctgagtttgtttgaggactttgtctattggacggatgggaagtccaaatcattacgacgcgctcacaagacaaccggcgctcaagggattgagctcctcaactcctggcaggccatcaaatccatcaaggtctaccactccctgcgccagcctgaagtacccaaacaccagtgtcagattgcgaacggaggatgcagccacctgtgtcttctatcccccggcggggaacataaatgtgcctgtcctactaatttttacttggccgctgacaataagacctgcctgtccaactgcacctccagccagttccgctgcgggacggatgagtgtatccctttctggtggaagtgtgacacagtggacgactgtggggatggatcagacgaaccccttgactgcccggaattcaaatgtcagcctgggcgtttccagtgtggcactggcctctgcgcccttcctcctttcatctgcgatggagagaatgactgtggtgacaactcagatgaagccaactgtgagacctacatctgtctgtcgggccagttcaagtgcaccaggaaacagaaatgcatccctcttaacctgcgctgcaacggtcaggacgactgcggtgatggagaggatgagacagactgccctgaaagcacctgctccccagaccagttccagtgcaaggcctccatgcactgcatctccaaactctgggtttgcgatgaggaccccgactgcgctgacgggtcagacgaggctaattgcgatgaaaagacctgcggacctcatgaattccgctgcgagaataacaactgcatccccgaccactggaggtgcgacagccagaatgactgtggagacaactcagacgaggagaactgcaagccagtcacctgcaaccacaaggactttgcctgcgctaacggagactgcatctcctcccgattccgctgcgatggggactacgactgcctggataattcagatgagaaaggctgcgaggagcgctgtgcagaggaccagtttcggtgtcataacaacctgtgcatctcgctgaagtggctctgcgatggccaagaagactgcaagatgggggaagacgagagaaattgccaggggacagtcccttcatgctccgtcaacgagtatgtctgtgccagcggagggtgtgtgtcagccagcctgcgatgtgatggacatgacaactgtctggatggctcagatgagattggctgtgtgaaggagtgccgggaggacgagttcctctgcctgaatcgtgctcactgtatccctcggcgctggcgctgtgatgacgtgttggactgcatggaccacagtgatgaggaaaactgcagccagggtgctttcttctgccgggctgatgaattcatctgcaacaacacgttatgcaaactccacacgtgggtgtgcgacggcaaggatgattgcggagataactccgacgaagactcagacatgtgcgccaaacttccctgccctcctacaaggccgttccgttgcagaaacgaccacgtgtgtctgcgcacagaccaagtctgcaacaaagtggacgactgcggcgacaactcggatgaagaggaatgtggtgagctcaggaaacctcgaccttgtgggaagacagagttcacatgcggcaaccagcgctgcatcccgatccagctgcagtgcgacctcttcagcgactgcggcgacggcggctcggacgagcaagactgcaaggcccatgtatgtggaaagaaaacaaatccgtgtggagaggatgcggtttgcaaccagacgaatgttaatgctatatgccagtgcaaagctggctttaagaggaaccagaagacaggccagtgtgaagagatcaatgaatgtctgcagtttgacacgtgtccgcattactgcacgaacactaaaggatctttcaagtgcacgtgtgaccgaaactacaaggagatcaatggcaactgcatagcgaaaggaccagaagatcgagtgctctacatagccaacgacactgagatccgaagttttgtgtacccatttaaccagagccacgggcacaagattctcacccacattgaggacaatgcccgaattattgggatggatgctctgtttcaccaccagaagtttatctgggcaacccaatttaaccctggtgggattttttacaaagacactctagagagaactcaaagtaaaacgaattgttcagacttccgtcgacccagagatatttctgctgactggatcacaggcaacatttattggactgatcactcgcggatgcactggttcagctattacacagcccactggactaaattacgatattccataaacgtggggcaacttaagggaccaaattgcacccgcctgattactgacatagcaggagagccatatgccatcgctgtcgacccagccagagggatgatgtactggagcgtaataagtgatcactctcatatagaggaatcggccatggatggctccttacgtcgagtgctcctggagaaaaatctcaggagacccactgggctggccattgattatttcaaccagcgattatactgggcagatccggagctctcacatatagggagcatgagattggatggctcggaccctctggtgacaatcaggatctcacaaccatacagactcgatatatttgaagacttcatctacggaactggactaaaacacgaggtcttcaagattcacaaatacggcaaacagccggtggagtttctcaatttggggatggagaagccgactaatgttttgatctcccaccgttacaaacaacaagatgcttcaaatccatgcctgagaatgtcttgtgatttcatgtgtctgctcaacccaaccggtgccagatgtacctgtccagaggggaaggtgctcgtcaatggcacctgtagtgaactgtgccggcccccctgcgagaacggaggccgctgcttggccaacgaaaaaggagactggaggtgctactgctggcccgacttctcaggagagcgctgtgaggtcaaccactgcacagactactgcctaaatggaggcacctgcatgggctcacccctgggtaagcctacctgccgctgtcctgttggtttctccgggcctttctgcgagaggaggatctgtgacaactactgcttaaatgggggaacatgtgacgtcactcaggggaaccagcccgtgtgccgctgtatggcagagtacaccggggatcgttgtctttaccacatctgccaccactactgcgtgaactccaaggcctgcacgctgtccagtagtggatatgtggagtgtgtgtgtcctgccaggtttgagggaaacaagtgcgaggtggacaagtgtctccgatgccacggagcaccgtgcctcattaacgaggagacgggggatgtggtttgcaactgcacaaatggcagaatagcgccgagctgtcagctctgtgacggatattgctacaatggaggcacctgtcacctggaccccgacaccaacctgcctttctgtcaatgttcagccaattgggcaggcacacagtgtgaaagacccgcccctaaaagcagcagatcagacaacaccagcggaggtgagtactcggaattttttcgaaacatgttgaccttcatgttgtgtgtcatgttaatgatggctggcttcacacacctcaggggaaaacgtgtccaaagacagcccatgacaaacggagggataaacgtggagattgggaacccgtcatacaacatgtatgaagtggaccacgacaaccatgctgatgcaggcagcctgctgcgacccaacttcacgctggaccctcacaaggtttgctatataccacaaaaactttgtaagctgatccatcagatgcccccaagtgtgtatgcaaagatatatatcgacgggcaaaactgccggaagccggtcatcagtatcgacgagaggagagagctactcccaaagaaactagaggggacaattcatgaaaccgccgcatag
>ENSSAUG00010002541|jag1b
atgtgggtgacttcgggggggaagaagaaagacagaaagaaagaacgaaaaaaaaacagggggtcaaagtttgtttggttttgtttttttccgttgcactcatttcttctgtcctctcaacaggtgtcagagggatccggacaattcgagttgcaaatcttatcgatgcacaatgtgaacggagagctgttcagcggcatgtgttgtgatggctcgcggaccacggcggatagaaaatgcacgcgggacgagtgcgacacgttttttaaagtttgcctgaaggaataccagtcgagggtttctgctgcagggccctgcagcttcggaatgggatctacgcctgtcctcggagggaataccttttctttcaggagctcagtcaggaatgacaaatcccggatagttttgcccttcagttttgcctggccgaggtcctacactttgatagtggaagccttggacttcaacaatgaaaccagtggcgcagatgggaagctgattgagaaagcctctcattccggcatgatcaaccccagcccgcattggcagaagctgacacacaacggcccggtggctcagttcgagtatcagatccgggtcagctgcgacgagcactactacggcttcggctgcaacaagttctgtcggcccagagacgagttctttgggcattacacgtgtgactataacggaaacaagacctgtctggaaggctggtctggacctgactgcaacacagcgatatgtagacaaggctgcagcactgaacatggattttgtaaggagccagggggatgcaagtgtctgtatggctggcagggccagtactgtgacaagtgcatccctcaccctggctgtgtacatggcacctgtgtagagccatggcaatgcctgtgcgacaccaactggggcggccacctttgcgataaagatctgaactactgtggcactcaccagccatgcctgaatggagggacatgcatcaacacaggacctgacaagtaccaatgtacgtgtgctgagggctactctggtgccaactgtgagagagcggaacatgcctgtctgtccaatccatgctccaatggagggagctgttcagaaaccagccaaggttatgaatgtcagtgtgcgccaggctggagcggcccctcctgcaccatcagtaagattgcactcaacctgcacccattaaatgtcttctgcacatgcaaatgccacacactctctctctctccctctctagatgccaacgaatgcgatagcaagccttgtgacaatgccaactcatgccgcaacctgattggtggatacttctgcgagtgcatccctggttggatggggcagaactgcgacatcaatataaatgattgcaaggaccagtgccagaatgggggaacttgcaaggacttggttaatggctatcattgtgtgtgcccccctggcttcgctggcgagcattgcgagagggacatcgacgaatgcgcgagctcgccgtgtctgaacggcgggcgctgtcaggacgaagtgaacagcttccagtgcctgtgtctggctggcttttcaggaaatctgtgccagctggatatcgattactgctccccaaacccgtgtcagaacggagccccctgcttcaacctggccacggactactactgcgactgccccgaagactatgagggcaagaactgctctcacctcaaagaccactgtcgcaccaccacatgtaaagtgattgacagctgcactgtcgctgtggcgtctaacagcacaccaggtggggagcgctacatttcatcaaatgtgtgcggaccccatggtcagtgtcgcagccaggccgggggtcagttcagctgcgagtgtcaggagggcttcagaggcacctactgccatgagaacatcaatgactgtgagagtaatccatgcagcaatggaggcacctgcatcgacaaagtcagtgtgtaccagtgcatctgccgcgacggttgggagggcgaccattgcgagatcaacatcgatgactgcagcaccagcccctgtcataatggagggacatgtcgagacctggtgactgatttcttttgcgagtgcaaaaatggctggaagggaaagacgtgccactcccgtgaaagtcagtgcgatgaggccacatgcaacaatggtggcacctgccacgatgagggcaacacgttccaatgcaagtgttccccagggtgggagggtacaacatgtaacatagccaaaaactcaagttgtcttccaaacccgtgtgagaatggaggtacctgtgtggtgactggagagtcgttcacctgcgtctgcaaagaaggatgggaaggtcccacgtgcacccagaataccaacgactgcagtccccacccatgctacaacagcggaacctgtgtcgacggggataactggtaccgctgcgagtgtgcctcaggcttcgctggtccagactgtcggatcaatattaacgagtgccagtcctctccatgtgcctttggctctacctgtgtggacgagatcaacggatatcgctgcctgtgtccaccagacaggactggaccccactgccaagaagtgacaagaaagcattgctctgtgaatggacacgtcacccctgatggagtcaaatgggacgaagactgcaacacttgccactgttccaatgggaaagtggtgtgcacaaagatgtggtgtggtcctacatcgtgccacctgggtgccaaaggtcgaggcgggtgtccttcaggccaaaactgcatccccatcagagagggccactgctttgtgaagccctgcctcgttttcggcgagtgctggcgctccaaccctcccccgcctcccaccaaatgccaccccagctccagttaccaggacaacagctgcgccaacatcaccttcaccttcaacaaggagaccatgactcaaggctcgtctgtggaggatgtatgcaagcagctgaggcgcttgtacgtagtgaagaatttctccttggagcattctgtgtccataacctgtgacccctcattctcagccagcaacgagatccacgtctgcatcgtaagttcctcctcccactcccagtcaatcacagacaggataattgacctgattagcaaacgcaacgggaacaacactatcatcagcgccatcgtagaggtgcgcgtgccaagccccaactaccttgtgccactcctcagctccatcttcatcgtcatctgggtgctcgtgctcgtcagcattttgctgtggtgcatgcggcgacggcggaaacagagcaaccataacgggacgacggccgccggctccgaggacaacacgaccaacaacgtgcgggagcagctgaaccagatcaagaaccctatagagaagcacgtgggcctcactgtggccatcaaagactatgaaaacaagaactccatcattgccaaaataaggacaaatcatcccgagggggatgaggacgacaaggagaggcacttacagaagggccgctttgccaaacagccagcatacacactggtggagagggacgagaagacgcccatctccaatcccaactccacgtccaaaaatcctaattggactaataaacaggacaacagagacttggagacagcaaacagcataaacaggatggactacattgtatag
>ENSSAUG00010005040|mapk1
gcagcagcagcggcagcctctccgctcctcgccctgcctgcctgcctgcgacagcacagcagtggtgtggtcgcccccgggtcgggaacggagctggtccgcgggcaggccttcgacgtcgggcctcggtacagcaacctctcctacatcggggaaggagcctacgggatggtgtgctctgcctatgaccgagacaacaagatacgtgtggccattaagaagatcagcccctttgagcaccagacatactgccaacgtaccctgagagagatcaaaatccttctgcgcttcaaacatgagaacatcatcggaataaacgacatcatccgcacaccaaccattgaccagatgaaagacgtatatattgtgcaggatctcatggagacagacctgtacaagctcctgaagactcaacacctgagcaacgaccatatctgctacttcctctaccagatcctacgagggctcaagtacatccactctgccaacgtcctgcatcgcgacctgaagccttccaacctcctgcttaacaccacctgtgatctcaagatctgtgattttggtttggctcgcgtggctgatcctgaccacgatcacactggcttcctaacggagtatgtagccactcgttggtaccgagcacctgagatcatgctcaactccaagggctataccaagtccatagacatctggtcagtgggttgcatcctggctgagatgttgtccaacagaccaatttttccagggaagcactacttggatcagcttaaccacatattggggatcctcggttctccctctcaggaggatctcaactgcatcatcaacgtcaaggccaggaactatcttttgtcacttcctttgcgctgcaaagtgccgtggaaccgccttttccccaacgctgatcccaaagctctggacctgttggacaagatgttgacctttaaccctcacaagaggatcgaggtggaggcggccctggcgcacccctacctggagcaatattacgacccaacagatgagcctgttgctgaggccccattcaagtttgacatggagctggatgacctacccaaagagacactgaaggagctcatctttgatgaaactgcacgtttccagcgtgcctttaggtcctaacatttcacatag
>ENSSAUG00010002541|jag1b
agacggttcccactccttattttccaccccatcatcatcactgtgtcagagggatccggacaattcgagttgcaaatcttatcgatgcacaatgtgaacggagagctgttcagcggcatgtgttgtgatggctcgcggaccacggcggatagaaaatgcacgcgggacgagtgcgacacgttttttaaagtttgcctgaaggaataccagtcgagggtttctgctgcagggccctgcagcttcggaatgggatctacgcctgtcctcggagggaataccttttctttcaggagctcagtcaggaatgacaaatcccggatagttttgcccttcagttttgcctggccgaggtcctacactttgatagtggaagccttggacttcaacaatgaaaccagtgatgggaagctgattgagaaagcctctcattccggcatgatcaaccccagcccgcattggcagaagctgacacacaacggcccggtggctcagttcgagtatcagatccgggtcagctgcgacgagcactactacggcttcggctgcaacaagttctgtcggcccagagacgagttctttgggcattacacgtgtgactataacggaaacaagacctgtctggaaggctggtctggacctgactgcaacacagcgatatgtagacaaggctgcagcactgaacatggattttgtaaggagccagggggatgcaagtgtctgtatggctggcagggccagtactgtgacaagtgcatccctcaccctggctgtgtacatggcacctgtgtagagccatggcaatgcctgtgcgacaccaactggggcggccacctttgcgataaagatctgaactactgtggcactcaccagccatgcctgaatggagggacatgcatcaacacaggacctgacaagtaccaatgtacgtgtgctgagggctactctggtgccaactgtgagagagcggaacatgcctgtctgtccaatccatgctccaatggagggagctgttcagaaaccagccaaggttatgaatgtcagtgtgcgccaggctggagcggcccctcctgcaccatcaacattgacgactgctctccaaacccctgtaatcacggaggaacctgccaggatctggtgaacggctacaagtgtcactgtccttcacagtggacgggaaagacgtgtctgatagatgccaacgaatgcgatagcaagccttgtgacaatgccaactcatgccgcaacctgattggtggatacttctgcgagtgcatccctggttggatggggcagaactgcgacatcaatataaatgattgcaaggaccagtgccagaatgggggaacttgcaaggacttggttaatggctatcattgtgtgtgcccccctggcttcgctggcgagcattgcgagagggacatcgacgaatgcgcgagctcgccgtgtctgaacggcgggcgctgtcaggacgaagtgaacagcttccagtgcctgtgtctggctggcttttcaggaaatctgtgccagctggatatcgattactgctccccaaacccgtgtcagaacggagccccctgcttcaacctggccacggactactactgcgactgccccgaagactatgagggcaagaactgctctcacctcaaagaccactgtcgcaccaccacatgtaaagtgattgacagctgcactgtcgctgtggcgtctaacagcacaccaggtggggagcgctacatttcatcaaatgtgtgcggaccccatggtcagtgtcgcagccaggccgggggtcagttcagctgcgagtgtcaggagggcttcagaggcacctactgccatgagaacatcaatgactgtgagagtaatccatgcagcaatggaggcacctgcatcgacaaagtcagtgtgtaccagtgcatctgccgcgacggttgggagggcgaccattgcgagatcaacatcgatgactgcagcaccagcccctgtcataatggagggacatgtcgagacctggtgactgatttcttttgcgagtgcaaaaatggctggaagggaaagacgtgccactcccgtgaaagtcagtgcgatgaggccacatgcaacaatggtggcacctgccacgatgagggcaacacgttccaatgcaagtgttccccagggtgggagggtacaacatgtaacatagccaaaaactcaagttgtcttccaaacccgtgtgagaatggaggtacctgtgtggtgactggagagtcgttcacctgcgtctgcaaagaaggatgggaaggtcccacgtgcacccagaataccaacgactgcagtccccacccatgctacaacagcggaacctgtgtcgacggggataactggtaccgctgcgagtgtgcctcaggcttcgctggtccagactgtcggatcaatattaacgagtgccagtcctctccatgtgcctttggctctacctgtgtggacgagatcaacggatatcgctgcctgtgtccaccagacaggactggaccccactgccaagaagtgacaagaaagcattgctctgtgaatggacacgtcacccctgatggagtcaaatgggacgaagactgcaacacttgccactgttccaatgggaaagtggtgtgcacaaagatgtggtgtggtcctacatcgtgccacctgggtgccaaaggtcgaggcgggtgtccttcaggccaaaactgcatccccatcagagagggccactgctttgtgaagccctgcctcgttttcggcgagtgctggcgctccaaccctcccccgcctcccaccaaatgccaccccagctccagttaccaggacaacagctgcgccaacatcaccttcaccttcaacaaggagaccatgactcaaggctcgtctgtggaggatgtatgcaagcagctgaggcgcttgtacgtagtgaagaatttctccttggagcattctgtgtccataacctgtgacccctcattctcagccagcaacgagatccacgtctgcatctcaaccgaggaccatcgcctagaccggaaccctattaaagagatcacagacaggataattgacctgattagcaaacgcaacgggaacaacactatcatcagcgccatcgtagaggtgcgcgtgccaagccccagcaaaactgactaccttgtgccactcctcagctccatcttcatcgtcatctgggtgctcgtgctcgtcagcattttgctgtggtgcatgcggcgacggcggaaacagagcaaccataacgggacgacggccgccggctccgaggacaacacgaccaacaacgtgcgggagcagctgaaccagatcaagaaccctatagagaagcacgtgggcctcactgtggccatcaaagactatgaaaacaagaactccatcattgccaaaataaggacaaatcatcccgagggggatgaggacgacaaggagaggcacttacagaagggccgctttgccaaacagccagcatacacactggtggagagggacgagaagacgcccatctccaatcccaactccacgtccaaaaatcctaattggactaataaacaggacaacagagacttggagacagcaaacagcataaacaggatggactacattgtatagcagacagctgtgttgctgtgcaaccaagccttacaccttcacaccccggtggtgggtgaaacgggggagctttggcatgtgtagttagtaaactgtcatgtcagtcgtgaccccacagtattttcagatattccccatgtgttaatttaagttttgacaagctggcttacactggcagtgacagttgctttggttggctggaaacacaaggcactggtatacatttcactgtaggactagttgcaaaagtgtccttctctgcatttcatttcccttttttaaatttgtttattttagtggacacatggaaggggctcctggtgtaattgttgtacaatgactaaaaactacccgacgtgttcaacactagagctaattacttttagtatgtgtttgaattctttctagttccgtttggagaaagtgccttttcagctttagacttaagcaactgtcaaatgagaaaaaaagatcaactttattatttatttttattttggggagggggagggaagggttcaatgtcagcagttgctgccaatatgaagaatttatgtgtcgatttagaaagtgtagatatgtacatttttttattaatcattgtatatatttgatttattaacttaataatcaagagccttaagatatcattcctttttatttatatgttctgtctagtttgaaggttttgatagctgtggaagcctaccatttctttcaatgacttaatttttttttttgtttttttttttcaacgcattctataaaaagccaaatttcaaagaagacaaaggatgggcacttttttgcctgaaagaaatactttctcttttgtttttccacacattttgacatttcattatttgttgccaggaccttgattgaaggcaagtgaggttaggacaacaaaagatgacggctgctgctgctgcaagggatggacatggtggcagacatattgcttgccactaatggtttaatacttaagggaacaaaaatc
>ENSSAUG00010002070|akt2l
agagagtccatggtgttttcctgggtggatggcctgcactggatctagcctgtcaaaactgcagtggaactagagcaacgagggataaagtcggaataatgggctgttcagatctagataactgtgactgagacttgaagggcttgcagagaagtccacagttcccctacctgacctcttgttcctgacactctttgaaacacatctcttaccatgaatgaagttaatatagtcagagaaggttggctgcataaaagaggtgaatatatcaaaacatggaggcccaggtatttcatcctgaagagtgatggttccttcattggttataaggagaaacctgatctaaatgaccagactttaccaccactcaacaatttctcagtggcagaatgccagttaatgaagactgaaagaccccggcccaacacatttgtcatacgttgtctacagtggaccactgtcattgaacaacaggctaaaatattacatcaagcatgttgtcattctcccactaggctcgtaccacaatatggtgaaaatgttttaagcgattccccaaggccttcaacgatgagtgactttgagtacctgaagctgcttgggaaggggacgtttgggaaggttattctggtcaaagagaaatccatgggagtccattatgccatgaaaatactgcgcaaagaggtcattatagccaaggatgaggtggcccacacagtaacagagagcagagtgttacaaaacacacgacaccccttcctcacgacactgaaatatgccttccaaacccacgatcgactctgttttgtcatggaatacgccaacggaggcgagcttttcttccacctttcacgcgaacgagtgttcacagaagaccgggcacgcttctacggtgcagagattgtgtcagcacttgagtacctccattcacgtgatgttgtttaccgtgatctgaagctggagaatctgatgctggacaaagacggccacatcaaaatcactgattttggtctttgtaaagagggcattacccctgatgctaccatgaaaaccttctgtggaactcctgaatatctggcacctgaggtcctagaagataatgactatggcagggcagtggattggtggggtctgggtgtcgtcatgtatgagatgatgtgtggccgtctgcctttctacaaccaagaccatgagcgtttgtttgaactcatcctcatggaggagatccgtttccccaggaacctgtcacccgaagccaagtctctgctggcaggtcttctcaagaaggaccccaaacagaggttaggtggaggtcccgatgatgccaaagaagtaatgactcacaaatttttcatcaccataaactggcaggatgtggtacagaagaagctcaccccactcttcagaccacaagtgacatcagagacagacacccggtactttgatgaggagttcacagcgcagaccatcacactcactcctccagacaagtataacagtctggactgcgaggactccagccagcaagcacatttcccccaattttcttactctgccagcataagagagtga
>ENSSAUG00010005337|cast
gtgtgtgtaaatgtgcaggttattttaccgtgttactgtgtgtggagcagtgtaaatgaacatcatgtgtgatatctaacctctccctctgcaagaccttacttgcagctctatcttaaacacgcactctcacagctgggctgcacactaaacattaagtttgtgccagctctgatcaatcatcacacgccggagaagtgtttttcagcgggaggggcaacttattattgctctgaggggcagatcagcctactctgattccccaaaaacaactgaggagcgagggcgcagagggacactttaaaaagttaatctgtccgcgttttgaagatgccacaaaaaaagaaaagccacggtcagcacaagggcgccaaggaggtcaaagaatcgcagcctagccaggccacacccaaaccagccgctcaggtctccaccgtgaagcctgctcagtacgagaaggcttcatcaggatccgccatggctacaaagcctggggtggtttccacagcgacaggtggagccacaggaagtggcgtcaaagcaggaggaagtgcttcaattgggactgcaggaaaagagtcacctaaagccaaaacagagactaacactactccggcaggcgctactgttatcgacatgtcgtccgctgaggttgctattgttgacatgacatcagtggggtcgagaggcggtcctaaagagatgtcaaagactccaccaactgtctctcaaggtaaggccgcagctacagttccctctgctgctgctggagcggctgcagcagctggtgtggcggcgaccacacctaaagagtcacccaaaggcccagccaagagtgccgctgccatcacaacactcaaggctgatgtggctaaagttgatccggttaaaacatcaaagtcaacggcagcagccaaggtgcaggtggaggttcctcccacggcagccaaaggagcaaaagaggcacctgccgtggatccatttgatgccctggccagcatactgccatcagctgatcccgtcgcaccagagcctgtttacacggggccagaggtcaaagagcatgacgtcatctctgagaagggtcataagtgtggcgaaagagacgacacgctgcctccaggctacagatttaaagatatgcctgctgtccctgccgatgtcaaaccgaaggacgtccctaaaccactgagcacagacgaggccctggattctctttcagctggtttcatgtcttctaccactccagctgcaggcatgcagccagagaaaaagggccacgtcgacgttgtcagcgcctcatctgccggccctgctaacttcgcaccacctcctgtgcagaaatctcaaacctctgccgcagctcctcctgctgataaaaaagccaggatggagaaagcttctgatgatgtctctcagaaggctgggcgcccctctgctccttccaagagcgcaatgcctcaggacgctctcagtgctctcgttgactcgttgccagcagacataccaaaacctgaaccccccaaactcagacctgaggacatggtctcggagggtaaacacaagaaggagaagggtgttcttgtaggagagagggacgatacaattcatccgaactacaggtttgatgaggagaaactcaaaaaactgcctgctcccaaacctgagcccaaaatagccactagtgatgctctggactttttgtctgaaggcttcctggactcctcagtggctcctgtacagaaagcccctcctgttgctgtgtgtcctgctcctgctgataaaaaagccaagatggagaaagtcggtgatgatttctctctggaggccggactctctgcttcgacggccaagaaagtggaatcctgtgccgtcccccctgtggctgtgtgtctctctcctgctgatcaaaaagccaaagcagggaaaagtgctgccggaaaggacagcactgacggcaagctcaagaccgatctgggaaacatgcctctggacgctctcagtgctcttggtgactcgttggcagcagacaccccaagacctgaactccccgaagtcaaacctgaggacatggtctcggagggtaaacacaagaaggagaagggtgttcttgtaggagagagggacgatacaattcatccaaactacaggtttgatgaggagaaactcaaaaaactgcctgctcccaaacctgagcccaccttggcccccggcgaggctctggactttttgtctggagacctgatgacctcctcagcagctccctctgtccaggctcccgttgtcaccccctcagctcctcctgcacagaccaaagtagaggatttgtcagctctggatttactttcggacgattttgtggctccaaccaaagcttcaggagtccaggcccctgtccctccttctaccaagaagaagacaccagagaaaacggtttgtcccagctcagttgatgtcgctcctgcaaaacccaagactgacgactctttgtctctggacgctctcagtgctctcggtgacacactggcagcagacacaccaagacctgagctccccgaagtcaaacctgaggacatggtctcggagggcaaattcaaggaggagaagggtgttcttgtgggagagagggaggacacacttcctccagagtacaggtttgataaggacaaactccaaaagctgcctgctcccaaacccaagcccaccattggtactggagacgctctggactttttgtctggagacctgatgacctcctcagcagctcctgctgtccaggctcccgttgtcaccccctcggctcctcctgcacaggcctctgatgacttcgccctggatgccttggcaggagactttgtttccaccgctgctgctccagtagttaagtctggttttgctcccccaaagactgcccggcagctgtcagggggaacagacagcgccctggacgctttgtcagacaccttgaaggatatcacacccgcaccccagcccgccccggtcccgagtaaagacttcgtcaaggagaaaaagattgttgaagagaagctgataaagatgggagagagagacgactcgctgccgccagagtttcgacccacagaggaagagcgtaagaaaattgaagaatcaaagaaaaaggcagccgcagcacccaagcagtctatggatgataaaacagccttggacctgcttgccggtgatttcgaaactgctccaaagcccgctgcagctgccacatcgtgtgcagccgcgacaaagctggaacctcctgtgctggactcagatcccctgaagccaatggccggtcctgtcctggacaacctggcaagcacgctgctcccagaggcggtcaaaacaaagacagacaaaccaaagggcaagaacaagtcaaagtccaggtctaaaaaacaccacgcagaggagccatctgccaccgacctgctagcaggtcagctcagctcagacgtcgtgccaacatctacaaagaagggaggcaagagctagaccacttggtcggcggtgtaattcgtcctcccggccacaggggcgtgtcagcgagggggagcagctcgatggcgacgattctatttttctaaattgtcaagaatgtacagtttatgtgctggatgagagatgaacttaagacacacccatatcacttgctcgacacacacagacacacacagacacatacacacacggagctctgcctgcggcgcctttcttgctcggtttcgcctgtatttaaggatgagaggcttgtggtgtcaatgagatattttttttttttttaaactagatggagaatgagaaggggaagtgtgcagggacatagaggaattgaagacaagtgaaaatgttaaggttttttttctggttggtgtgatgagcttgccgaaggaagaaaggcgctgctcgtcagagtcctgcgcgcacatctcagctgacggtttccatggctcaagcgccactgatgtcacgcctcactgctcctgtgagctgtgacattggtcagcgcagcggtgactgtcagctggcctgggagcagtgaggagtgggtgtatagtatcgggatgtttgtgcaatcttgatgtacacagaaaaaaagccaagttttcttcttttttttttatcacgatgtggtcagacgccttaaggacactagtgtacagcttagtttgcttgtatttttggacaacacatagtttacatgatatctggaggattttccaggaggtgatctgcttaaatccgtattcgagagcttctcgcaaatgcctttaactttctggagagaactgtatgtcatgaggagggtctgtatgtatttggctgtgtagagaaaaaaaaaagaaatgctggcgtccaaaagtgcacttagtgagctgaggtggttacaagctttggaaactgcctttatttgtatactgtacacataaataaaaaaataaaaaaagattttttttgctctaca
>ENSSAUG00010004791|mstnb
gatgcctgtcagtgtgggactttaatccaaacccagtccagccgcgcgtcacgtccagcacaacccaacggatctttttcttcttaaaaccaaactttcacaccttagagagaatgcatccgtctcagattgtgctctatcttagcttgctgattgttttgggtccagtagttttgagcgaacaagagacgcagcagcaacaacaacagcagcagcagcagcagcagccctccgccaccagcccagaagacacggagctgtgcgcaacctgcgaggtccggcagcagatcaaaaccatgcgattaaacgccataaagtctcagattctgagcaaactgcgaatgaaagaggctccaaatatcagccgggacatcgtgaagcagctcctgcccaaagcgccgccgctgcagcagcttctcgaccagtacgacgtgctgggagacgacaacagggatgtggttatggaggaggacgatgagcacgccatcacggagacgattatgatgatggccactgaacctgagcccgtcgtccaggtggatggggagccgaggtgctgctttttctccttcactcaaaagattcaagccaatcgaatcgtacgagcgcagctctgggtacatctgcgcgcgtcggacgaggcgaccacggtgttcctacagatctcccgcctgatgccggtcacggacgggaacgggcacatacacatccgctccctgaagatcgacgtgaacgccggggtcggctcgtggcaaagtatagacgtcaaacaagtgttgagcgtgtggctgcggcagccggagaccaactggggcatccagattaacgccttcgattcgagggggaatgacttggccgtgacctccgcggagcctggagaggacggattgcaaccgttcatggaggtgaagatttcggaggggcccaagcgtgtccggagagactcgggcctggactgtgacgagaactctccagagtcccggtgctgccgctacccgctcacggtggacttcgaagactttggctgggactggattattgccccaaagcgctacaaggccaactattgctccggggagtgtgagtacatgcacttgcagaagtacccgcacacccacctggtgaacaaagccaaccccagagggtccgcgggcccctgctgtacccccaccaagatgtcgcccatcaacatgctctactttaaccgaaaggagcagatcatctacggcaagatcccctccatggtggtagaccgttgtggatgctcttgagtcgggagggagatctcggcgaggtcggacggctcggtccgggcctccagttttcagactttttgacacaaccgatccaccagttccagtgcttctcctgcagcaacacagtgcaatagaaaccagagtagaggccacaatcaagcccgaccttcccgcagggcagcgctgctttcacatccggcacagctctcaccttttttctttcctcctgtgaaatcttagctcgaagtcagatggatgcaggaacacacacacacacacacacaaacacacacaaacacacatgccggaccttgggagtgaatgtagatagaaattattatccagaaaacttttctcgtccttcgtcgtctcggtgttctgcgctctgtccatttatacaaaacatgccgacagattatactcgtacgccatctccgatcgtagccgacatgcaagctattacacttttttctgctaagctatgtgtttgtgataatcatttgttcaagttatgtttttaagagtgaaaccaggaatcctcatggactttttgaaagggcttgggaaaaacacagctgggggactcttgagcgtggtacttcacactggtagaacatgtttttaggacaacgtaggagttgatgaaacgatcaaaaccctaattcctaactagaaattaccacatcaaccaatttggaaactccttcctgtatcagacgagcttaacatctcatttagttcttcgattaacgacaccgggaacttcaggttcaggttttcaacgtgccggtcgatcatgttccaccagggtgaagtagcacgactttaggtcttgacaggtcttcatatactctcgccatacatccacgcaacaacatacccgacggaggagcgtcctcgctcagtcacaatcatcactatccaaca
>ENSSAUG00010003494|igf2bp1
agagagaggaaaacattttcccgatctgatcccgccatagtttttcccactcttccaccacagacccatcaccaaatccatccagtacaacccacctcctccacagtgcgatagagaggctataggctgctgctttattcgtctgctggggccgggctgcaagtcaagggattcatttctcctcctgctccacttattctactggatttacggctaaattcaacgttaccatctggttttacacttctaaaatctctttttttttattttactttcctaacgagaatttacgtttcttccgttctgtgtttctttaaaaatatttttgagatattcttgccctctagcgagatttccactttcagttagtgtgacactatcttgttgcgctattagcagattcaggagataaactttttttcgctgggttaaattctagcatttccgggctttgttttttttttcttcgttttttggacttggaaaaacaatttccaccatgcacaagctatacattgggaatctaagcgacaacgtgactgctgaggacttagggaaaacctttgacgaccacaagatcccatactccggacagtttctaatgaaaaccggctatgcgtttgtggattgtccggacgatcagtgggccatgaaggctatcgagacgttttctggtaaagtggaacttcaggggaaacgtattgaagtcgagcactccgtccccaaaaagcaaaggaccaggaaattgcagatcagaaacattccacctcacttgcagtgggaggttagtccctatttcttccattatttttctttgaacacagagagtgagactgctgtggtaaatgtcacatatgcatcccgggagcatgccaggcaagccatccagaagctgaatggttaccagtttgagaacaatgccctgcgtgtctcctacatccctgatgagaactctgagctggagggaagccagagggggtccgattatggccgtcgacctggctatggctcccgagctcagcacgtagacatccctctgagactgctggtacccacacagtacgtcggtgccatcattggcaaggagggagccaccattcgtaacatcaccaagcagacagcgagcaagattgacgtgcatcgcaaagagaacgcaggtgctgctgagaagccgatcagcatccactccacccctgagggctgctcggccgcttgccgcatgatcctggacatcatgcagcaggaagctaaagacaccaagactgctgatgaggttcctctaaagattctggctcataataactttgttggacgcctgattgggaaggagggacgcaacctgaaaaaagttgaacaggacacagacaccaagatcaccatctcacctcttcaggacctgacactgtacaatccagagagaaccatcacagtcaaaggcccgattgaagcctgctgcctagctgaggtggaggtcatgaagaaggtcagagaggcctatgagaacgacatcgctgctatgaatcaacagacccacctgatacctgggctcaacctgggtgctctgggcctcttcccctcctcctccaacatgccgccacccccgcctggaaactccacctctggtgctccctatggttgctttggggtaagaacacctgctccagaacaggagactgtccacgtatacatcccagcacaggcagtgggagccatcattggaaagaaagggcagcacatcaaacagctgagccgcttcgctggggcctccatcaagattgccccagctgaagctccagactctaaaatgaggatggtgattgtgacaggaccccctgaggcccagtttaaggctcagggcagaatttatggcaaactgaaggaggaaaacttctttggaccaaaggaggaggtcaaactggagactcacatcaagatggctgctgccgctgcagggagggtcattggcaaggggggcaagacggtgaatgagctccagaacctgacagcagctgaagtggtggtccccagggaacagacaccagatgaaaatgaccaggtcatcgtcaagatcaatggacatttctacgcaagccagttggctcagagaaagatccgggacatcctgacccaggtcaaacagccacagaaaggtgggatgggcatgggctctggctcaaacccccagggcttcacagagatgggcagccctacacaaggactgactcaggatcaacagccacgcaggaagtgagggtacccccaacctcctcacatgccgtgggccccccaacacctgacggacagacggatagacacatgcacggacggatagacagacgaatggacggacacaggagagcgacacacggacccagcgatagacagggagagatataaagagggagggagtacgcccgatagccagagagaaagatcagagtttagagagaaagagaggagatgaataaaatcacaacgaagaaatgaattaaaaaagag
>ENSSAUG00010002070|akt2l
agagagtccatggtgttttcctgggtggatggcctgcactggatctagcctgtcaaaactgcagtggaactagagcaacgagggataaagtcggaataatgggctgttcagatctagataactgtgactgagacttgaagggcttgcagagaagtccacagttcccctacctgacctcttgttcctgacactctttgaaacacatctcttaccatgaatgaagttaatatagtcagagaaggttggctgcataaaagaggtgaatatatcaaaacatggaggcccaggtatttcatcctgaagagtgatggttccttcattggttataaggagaaacctgatctaaatgaccagactttaccaccactcaacaatttctcagtggcagaatgccagttaatgaagactgaaagaccccggcccaacacatttgtcatacgttgtctacagtggaccactgtcattgaacgtacttttcatgtggacagtaatgaggagagagaggagtggatgtgggcaatccagtctgtggcaaatagtttaaagatgcgggaacaggaggaggaagagccaatggatgtgttcggctcacccagccaatgcagcttggaggagatggaagtggctatgtctaagagcggcaccaaagtgacgatgagtgactttgagtacctgaagctgcttgggaaggggacgtttgggaaggttattctggtcaaagagaaatccatgggagtccattatgccatgaaaatactgcgcaaagaggtcattatagccaaggatgaggtggcccacacagtaacagagagcagagtgttacaaaacacacgacaccccttcctcacgacactgaaatatgccttccaaacccacgatcgactctgttttgtcatggaatacgccaacggaggcgagcttttcttccacctttcacgcgaacgagtgttcacagaagaccgggcacgcttctacggtgcagagattgtgtcagcacttgagtacctccattcacgtgatgttgtttaccgtgatctgaaggtcctagaagataatgactatggcagggcagtggattggtggggtctgggtgtcgtcatgtatgagatgatgtgtggccgtctgcctttctacaaccaagaccatgagcgtttgtttgaactcatcctcatggaggagatccgtttccccaggaacctgtcacccgaagccaagtctctgctggcaggtcttctcaagaaggaccccaaacagaggttaggtggaggtcccgatgatgccaaagaagtaatgactcacaaatttttcatcaccataaactggcaggatgtggtacagaagaagctcaccccactcttcagaccacaagtgacatcagagacagacacccggtactttgatgaggagttcacagcgcagaccatcacactcactcctccagacaagtataacagtctggactgcgaggactccagccagcaagcacatttcccccaattttcttactctgccagcataagagagtga
>ENSSAUG00010004680|PCNA
tctttaaaacctgacgttagcgcgcgcttaccagctcaaaccctccgtcttgcagtgagagtgtctctgcgtgctgcgccgctgctagctaacaacacaaagactgaacttttagaggagtctgtctctctcgttactcgcttatatctcaaactgcagcctccattttgacggagtgacgctacaaggcgacagcaaactctcttcgtttgaatctacgcagacttaaacttccacagccaccatgtttgaggctcgtctggtccagggctccatcctgaagaaggtgctggaggctctgaaggatctgatcacagaagcctgctgggacgtcagctcgtccggcatctccctccagagcatggactcctctcacgtctcgctggtgcagctcaccctgcggcacgatggcttcgactcgtaccgctgcgacagaaacctcgccatgggagtcaacctcagcagtatgtcaaagatcctgaagtgcgcaggaaatgaagacatcatcaccctcagagcagaagacaatgcagacacactcgcccttgtgtttgagacactcaatcaggagaaggtgtcagattatgagatgaaattgatggacctggatgtggagcagctgggtattccagagcaggagtacagctgtgtggtgaagatgccctctggggagtttgcccgtatctgccgtgacctgtcccagatcggtgacgccgtcatgatctcctgcgccaaggacggagtcaagttctccgccacaggagagctgggcacaggaaacgtgaagctgtcccagaccagcaacgtagacaaagaggatgaggcagtcaccattgagatgaatgaacccgtccagctgatctttgccctcaactacctgaacttcttcaccaaggccacgccgctgtcgaagactgtcacactcagcatgtctgctgacatccccctcgtggtggagtacaagattgctgatatgggacacgtcaaatactacttggcacccaagattgatgaagaagcttcctaagttgtttctaacagcccaaaaaggaagaatagagaaaagctggcgactgggacttgtcctgagtgattggaaggctgaagtgatctcgctttgatcactgaggtctctgatgtccgcccgtcacagcgggacgtgttgtgtcaactttgattcagtcagccgtatgaatgatgccatctgtgtgatgtgacgatgcttcagtggctctgaagtggagttcagagcagctggctgtggtccaaatagccccagtgtaaatttcagcacttgttcgctccactttggtgtctctctctctctatttttgcccattttgggaaatctggtttcaaatatcccattccttcttgtagataatgcatttgtaaatacttcctatggtgtcactgtcagccaaccccaaatgtttttgtattcattgattcaatccaaaataaataatccaagtggtttcc
>ENSSAUG00010005040|mapk1
gtccatccatccatccatttatccattgtctgtaaccgttttatcccttttatggggtctctggggttgttgcgggagcaacatccaagctgtctctgggcgagggttagggtacaccctggacaagtcgccagctcatcgccacgcaaggtgccagccgcacatcaggagcaattttgatttcagtatcttgctcaaggacacttcgacatgcagctcagctcagcccgcagctgggatttgaacctgggattataacactatatataataactgttacatttgtatgcagctaatcaataaatgcaatactttatgtagcctacattttttctgattatatctgtagcatcattcttcagtgcggcacttttacttataatggagtactttcacagtgtgggaataagtacttttattgcagtgaaggatctgagtacttcatccacctctcactggatctaacaccttactgtttggtttattctattctactatgtagaagcagtacctgaaagcgacactggtcatcccaaaagaacagaaagaagaagggaaagaaaaaaaggaaaaagagaaaacaccggatcacatgaccgccttcgttatttcctgcagcagcagcggcagcctctccgctcctcgccctgcctgcctgcctgcgacagcacagcagtggtgtggtcgcgctgaacgcacgctaacggaaggaaaaaacactccacacgtagtgaaggcctctgccaaactgaaagctctgtttcagtcacagcgacgacggatataaactgacacacacatatatattttttttctaatctcagtcgctctttttttatttggtagcgttgtaaaaggccagtcctcataatggcgacagctgcggtgtctgcccctgctggctgcggccccagccccgggtcgggaacggagctggtccgcgggcaggccttcgacgtcgggcctcggtacagcaacctctcctacatcggggaaggagcctacgggatggtgtgctctgcctatgaccgagacaacaagatacgtgtggccattaagaagatcagcccctttgagcaccagacatactgccaacgtaccctgagagagatcaaaatccttctgcgcttcaaacatgagaacatcatcggaataaacgacatcatccgcacaccaaccattgaccagatgaaagacgtatatattgtgcaggatctcatggagacagacctgtacaagctcctgaagactcaacacctgagcaacgaccatatctgctacttcctctaccagatcctacgagggctcaagtacatccactctgccaacgtcctgcatcgcgacctgaagccttccaacctcctgcttaacaccacctgtgatctcaagatctgtgattttggtttggctcgcgtggctgatcctgaccacgatcacactggcttcctaacggagtatgtagccactcgttggtaccgagcacctgagatcatgctcaactccaagggctataccaagtccatagacatctggtcagtgggttgcatcctggctgagatgttgtccaacagaccaatttttccagggaagcactacttggatcagcttaaccacatattggctctggacctgttggacaagatgttgacctttaaccctcacaagaggatcgaggtggaggcggccctggcgcacccctacctggagcaatattacgacccaacagatgagcctgttgctgaggccccattcaagtttgacatggagctggatgacctacccaaagagacactgaaggagctcatctttgatgaaactgcacgtttccagcgtgcctttaggtcctaacatttcacatag
>ENSSAUG00010003763|nfatc2a
atgtctaacatccacactggctcccctcgcacctccccgggcacctctcctggcaccagcctagctgaggacggctgcctggggccccgctcgccctcccccagacctggctcccgctccacctccccacagggcaaacgcacctacgacatgtacaggaatccaggcctagtccccgggcaccgctcccgcagtccctcccctcacagcggccatgaggatcacaacataggtgcccactatacacacagcagcctcgctgatgccatgaatgggtttggctctggtcagccaggcctggtgcccactaaaatagtcaagacgaccaaccaggtttacactctgtacccagaaaaccacgtagaaggaaactacttggtgtcctgcgagcaggacataaaaaccaaacctgctgcagagcctttctttgttatccccccgatctggtccaagccgctggtctccagcatctgcagcatccccgtggcctctctccctcccctggaatggccgatccccacccgcacagaccagtacgagctccacatcgaggtgcagcccaaaccgcatcacagggctcactatgagacagaggggagccgaggtgcagtcaaagcgcccacaggaggacatcctgttgtgcagctacacggctacagaggcaaggagccgctcggcctgcagatcttcattggtacggccgacgagcgcatcctcaagccccacgccttttaccaagtccaccgcatcaccggcaagacggtcacgaccaccagctacgagaaggtcatccacggcaccaaagtgctcgagatccccctggagcccaagaacaacatgaaagcaataatcgactgcgccgggatcctgaagctcaggaacgccgacattgagctgaggaagggcgagacggacgtcggtcggaaaaacacccgcgttcgtcttgtgtttcgtgtgcacatacctcagcccggaggacagtacgtctctctccaagtggcctcgcatcccatcgagtgctcccagcgatcggcacacgagcttcccatggtggagaagcaggacatggacagctgctctgttctgggaggccagcagatgatcctgaccgggcagaacttcagctccgattccaaggtcattttcctggagaaaaaccaggatgggcagcaaatctgggaaatggaggcaacggtggacaaagataagagccaaccgagcatgctgttcgtggaggtgccgtcctacagagacacgtccgtctgccatcccgtcaaagtcaacttctacgtcatcaacggcaagaggaagcgcagccagccccagcacttcaccttcacaccgctggcagctccatccattaagaccgagcctatagacgagtacgaagcagaccacatgggtttcgccatgccccagatcttgggcttgtcccctcattcctactaccataaccaacgcggcgtcctccatccagacaacggcctggtctccggcatggcctcctgccagcgcctcagctccagccttccaaaccaagacgcgcgtttccagcagcagagcccggccatcatgtactcccgcgggggcaagagtctgagcggcagccccggcctttatcagcaggctggagggataatagccgacccgcaccggtctgtcctggtccacaccggctccccggcccagtctctaggtcccatcgtcgcgggccagcacccttccatcatccagttctcccccaccaaccacctgcttcgagcgggagacccccaagccctcaccgctccccagcagcctgatagccagcagatcatctactgcgacggctactctccccaggcagccgccgccgcccactcgcccacgcccccgcaggctcaggcagcggtgacccaccctcagcactatcccaccgtgatccagcagcagccgtacacgcagaaggggcagcagaaaggccgagctccgcctggcacggggcagatggaggctccgggagacggacagaggagggtgacggtcaaggaggagaacttggaccaggcctacctagatgatggtgagtgtaagttaatgcttttatactctgagtga
>ENSSAUG00010002897|wnt3a
atgtttccaaaattggcgtgcactgacaatgtcgacttcccctctccttgcaggtcgctagcagtgggccaccagtactcctcactgggaactcaaccgatcctctgcggaagcatcccgggtctggtgcccaagcagctgcgcttctgccggaactacgtggagatcatgcccagcgtggccgagggggtgaagattggcatccaggagtgccagcaccagtttagaggaagacgctggaactgcaccacggtcaacgacaatctggccattttcggaccagtgttggataaagccactcgagagtcagcatttgttcacgccatcgcctcggcgggagtggcgttcgcagtgacccgtgcctgcgcagagggtccagccaccatctgtgggtgtgacacacctcacaagggcccccccggtgagggatggaagtggggtggctgcagcgaggatgtggagtttgggagcatggtgtcccgggagtttgctgatgcgagggagaatcggcctgatgcgcgctcagccatgaaccgtcataacaatgaggcaggaagaatgtccctcaatgacaacatgttcctgaagtgtaagtgccacgggctctcaggcagctgcgaggtcaagacgtgctggtggtctcagcctgacttccgagtcattggtgactacatgaaggataagtacgacagcgcgtcggagatggtggtggagaaacacaaggagtcccgcggatgggtggagaccttaagacccaagtacaactacttcaaaccccccacagagcgtgacctggtttactacgagagctcacccaatttctgcgaccccaaccccgagaccggctccttcggcacccgcgatcgcatctgcaacctgacgtcccacggcatagacgggtgtgacctcctctgctgtggcaggggtcacaacaccaggactgagaagagaaaggaaaagtgccactgcattttccactggtgctgctacgtcagctgtcaggagtgtgtgagagtctacgatgtgcacacctgcaaatgaagacgcctggttctcgtctttgctcaccaaaactgaaagacttcagtaggcatgagaacaaatacagcaactttgagagactgtaaggctgcctgagctatcaaggactccagcggcagacgtaacagtcttgtgtttttgtgtcgtgatgctagaaagagcccgtctttgcctcgatcagctgaaaagtagatgttgacatcgtccatatgaactgcaacaatgatgctgatgatgacaacaatgttgatatctctagcgatgagttttcatgtactgacgtagaaaaggagaactgtcggctaattgacgaacaccatattggtgattttttttttgttgtctctgtgctccacgtagttccttttgttgagattagtccagtactgccaatgctttcaagtctgtgtggcaaacaatgaaagtgtcacattttcttcaatgtttaatcatccttcgttttttgccacaacaagatttatgagctatttacatgatcagacactcaacagcatgcattctcctcctcaacggtataagtatgtatctaaaaactaacattatcgtgtgaatgggttgtgtttttttattttttatagtgttaatatgttactgatgtttgggtaagaatgcacttgcacctgagtgaatgtaattgttatgctgcaatgtgtttacatgttctccaatccttaagctaacaagctaatatctgccacaactaactttatccagagagtagacatgagccacattcgctgaacaagaacacacgcggtccgcacactttccagaaacacccgagaacaccggaagcttttttcttcagagtaacaacgcttcggatgacatggagagttatgaccaaagacgagaacagaaaacctgctgtaagtccctggaggtcagacaacccaatcgccagaataaatgtcagctaagtgcatttatgca
>ENSSAUG00010002541|jag1b
gggactctacaaggaagaggctcttctatgaatgtggaagtcgtgctccagggatccggacaattcgagttgcaaatcttatcgatgcacaatgtgaacggagagctgttcagcggcatgtgttgtgatggctcgcggaccacggcggatagaaaatgcacgcgggacgagtgcgacacgttttttaaagtttgcctgaaggaataccagtcgagggtttctgctgcagggccctgcagcttcggaatgggatctacgcctgtcctcggagggaataccttttctttcaggagctcagtcaggaatgacaaatcccggatagttttgcccttcagttttgcctggccggtgagttggatactttcaaacaaaacaaaaccaaaagaaagaaaactgattgagaaagcctctcattccggcatgatcaaccccagcccgcattggcagaagctgacacacaacggcccggtggctcagttcgagtatcagatccgggtcagctgcgacgagcactactacggcttcggctgcaacaagttctgtcggcccagagacgagttctttgggcattacacgtgtgactataacggaaacaagacctgtctggaaggctggtctggacctgactgcaacacagcgatatgtagacaaggctgcagcactgaacatggattttgtaaggagccagggggatgcaagtgtctgtatggctggcagggccagtactgtgacaagtgcatccctcaccctggctgtgtacatggcacctgtgtagagccatggcaatgcctgtgcgacaccaactggggcggccacctttgcgataaagatctgaactactgtggcactcaccagccatgcctgaatggagggacatgcatcaacacaggacctgacaagtaccaatgtacgtgtgctgagggctactctggtgccaactgtgagagagcggaacatgcctgtctgtccaatccatgctccaatggagggagctgttcagaaaccagccaaggttatgaatgtcagtgtgcgccaggctggagcggcccctcctgcaccatcagtaagattgcactcaacctgcacccattaaatgtcttctgcacatgcaaatgccacacactctctctctctccctctctagatgccaacgaatgcgatagcaagccttgtgacaatgccaactcatgccgcaacctgattggtggatacttctgcgagtgcatccctggttggatggggcagaactgcgacatcaatataaatgattgcaaggaccagtgccagaatgggggaacttgcaaggacttggttaatggctatcattgtgtgtgcccccctggcttcgctggcgagcattgcgagagggacatcgacgaatgcgcgagctcgccgtgtctgaacggcgggcgctgtcaggacgaagtgaacagcttccagtgcctgtgtctggctggcttttcaggaaatctgtgccagctggatatcgattactgctccccaaacccgtgtcagaacggagccccctgcttcaacctggccacggactactactgcgactgccccgaagactatgagggcaagaactgctctcacctcaaagaccactgtcgcaccaccacatgtaaaggtatcacaccaggtggggagcgctacatttcatcaaatgtgtgcggaccccatggtcagtgtcgcagccaggccgggggtcagttcagctgcgagtgtcaggagggcttcagaggcacctactgccatgagaacatcaatgactgtgagagtaatccatgcagcaatggaggcacctgcatcgacaaagtcagtgtgtaccagtgcatctgccgcgacggttgggagggcgaccattgcgagatcaacatcgatgactgcagcaccagcccctgtcataatggagggacatgtcgagacctggtgactgatttcttttgcgagtgcaaaaatggctggaagggaaagacgtgccactcccgtgaaagtcagtgcgatgaggccacatgcaacaatggtggcacctgccacgatgagggcaacacgttccaatgcaagtgttccccagggtgggagggtacaacatgtaacatagccaaaaactcaagttgtcttccaaacccgtgtgagaatggaggtacctgtgtggtgactggagagtcgttcacctgcgtctgcaaagaaggatgggaaggtcccacgtgcacccagaataccaacgactgcagtccccacccatgctacaacagcggaacctgtgtcgacggggataactggtaccgctgcgagtgtgcctcaggcttcgctggtccagactgtcggatcaatattaacgagtgccagtcctctccatgtgcctttggctctacctgtgtggacgagatcaacggatatcgctgcctgtgtccaccagacaggactggaccccactgccaagaagtgacaagaaagcattgctctgtgaatggacacgtcacccctgatggagtcaaatgggacgaagactgcaacacttgccactgttccaatgggaaagtggtgtgcacaaaggtatgcctgaacaaaacaagctctgcgtatgtactaaatgtagagggtgaggtatttatgatggctctatacagcgggtgtccttcaggccaaaactgcatccccatcagagagggccactgctttgtgaagccctgcctcgttttcggcgagtgctggcgctccaaccctcccccgcctcccaccaaatgccaccccagctccagttaccaggacaacagctgcgccaacatcaccttcaccttcaacaaggagaccatgactcaagtgagttacctaggcagcagggagggagagattgaattaaagggttttagggggtcgttttcacttgtgctcaaccatcgctccttgataattgacctgattagcaaacgcaacgggaacaacactatcatcagcgccatcgtagaggtgcgcgtgccaagccccagcaaaactggtatgaaccgcctccaaactctggttgttgcctgtgaattttcccagacttgcacacacttgcatgtgtggaaatgggtgggaggatgtttttttctgttgtttttgttttgctttgcttttttgaaaagatctgatgaaatacagccaagccctagatatgacagtaatcagctgaaccagatcaagaaccctatagagaagcacgtgggcctcactgtggccatcaaagactatgaaaacaagaactccatcattgccaaaataaggacaaatcatcccgagggggatgaggacgacaaggagaggcacttacagaagggccgctttgccaaacagccagcatacacactggtggagagggacgagaagacgcccatctccaatcccaactccacgtccaaaaatcctaattggactaataaacaggacaacagagacttggagacagcaaacagcataaacaggatggactacattgtatag
>ENSSAUG00010004791|mstnb
atgcatccgtctcagattgtgctctatcttagcttgctgattgttttgggtccagtagttttgagcgaacaagagacgcagcacccagaagacacggagctgtgcgcaacctgcgaggtccggcagcagatcaaaaccatgcgattaaacgccataaagtctcagattctgagcaaactgcgaatgaaagaggctccaaatatcagccgggacatcgtgaagcagctcctgcccaaagcgccgccgctgcagcagcttctcgaccagtacgacgtgctgggagacgacaacagggatgtggttatggaggaggacgatgagcacgccatcacggagacgattatgatgatggccactgaacctgagcccgtcgtccaggtggatggggagccgaggtgctgctttttctccttcactcaaaagattcaagccaatcgaatcgtacgagcgcagctctgggtacatctgcgcgcgtcggacgaggcgaccacggtgttcctacagatctcccgcctgatgccggtcacggacgggaacgggcacatacacatccgctccctgaagatcgacgtgaacgccggggtcggctcgtggcaaagtatagacgtcaaacaagtgttgagcgtgtggctgcggcagccggagaccaactggggcatccagattaacgccttcgattcgagggggaatgacttggccgtgacctccgcggagcctggagaggacggattgcaaccgttcatggaggtgaagatttcggaggggcccaagcgtgtccggagagactcgggcctggactgtgacgagaactctccagagtcccggtgctgccgctacccgctcacggtggacttcgaagactttggctgggactggattattgccccaaagcgctacaaggccaactattgctccggggagtgtgagtacatgcacttgcagaagtacccgcacacccacctggtgaacaaagccaaccccagagggtccgcgggcccctgctgtacccccaccaagatgtcgcccatcaacatgctctactttaaccgaaaggagcagatcatctacggcaagatcccctccatggtggtagaccgttgtggatgctcttgagtcgggagggagatctcggcgaggtcggacggctcggtccgggcctccagttttcagactttttgacacaaccgatccaccagttccagtgcttctcctgcagcaacacagtgcaatagaaaccagagtagaggccacaatcaagcccgaccttcccgcagggcagcgctgctttcacatccggcacagctctcaccttttttctttcctcctgtgaaatcttagctcgaagtcagatggatgcaggaacacacacacacacacacacaaacacacacaaacacacatgccggaccttgggagtgaatgtagatagaaattattatccagaaaacttttctcgtccttcgtcgtctcggtgttctgcgctctgtccatttatacaaaacatgccgacagattatactcgtacgccatctccgatcgtagccgacatgcaagctattacacttttttctgctaagctatgtgtttgtgataatcatttgttcaagttatgtttttaagagtgaaaccaggaatcctcatggactttttgaaagggcttgggaaaaacacagctgggggactcttgagcgtggtacttcacactggtagaacatgtttttaggacaacgtaggagttgatgaaacgatcaaaaccctaattcctaactagaaattaccacatcaaccaatttggaaactccttcctgtatcagacgagcttaacatctcatttagttcttcgattaacgacaccgggaacttcaggttcaggttttcaacgtgccggtcgatcatgttccaccagggtgaagtagcacgactttaggtcttgacaggtcttcatatactctcgccatacatccacgcaacaacatacccgacggaggagcgtcctcgctcagtcacaatcatcactatccaaca
>ENSSAUG00010003494|igf2bp1
agagagaggaaaacattttcccgatctgatcccgccatagtttttcccactcttccaccacagacccatcaccaaatccatccagtacaacccacctcctccacagtgcgatagagaggctataggctgctgctttattcgtctgctggggccgggctgcaagtcaagggattcatttctcctcctgctccacttattctactggatttacggctaaattcaacgttaccatctggttttacacttctaaaatctctttttttttattttactttcctaacgagaatttacgtttcttccgttctgtgtttctttaaaaatatttttgagatattcttgccctctagcgagatttccactttcagttagtgtgacactatcttgttgcgctattagcagattcaggagataaactttttttcgctgggttaaattctagcatttccgggctttgttttttttttcttcgttttttggacttggaaaaacaatttccaccatgcacaagctatacattgggaatctaagcgacaacgtgactgctgaggacttagggaaaacctttgacgaccacaagatcccatactccggacagtttctaatgaaaaccggctatgcgtttgtggattgtccggacgatcagtgggccatgaaggctatcgagacgttttctggtaaagtggaacttcaggggaaacgtattgaagtcgagcactccgtccccaaaaagcaaaggaccaggaaattgcagatcagaaacattccacctcacttgcagtgggaggttagtccctatttcttccattatttttcttgttgggatcatttagggcaagccatccagaagctgaatggttaccagtttgagaacaatgccctgcgtgtctcctacatccctgatgagaactctgagctggagggaagccagagggggtccgattatggccgtcgacctggctatggctcccgaggcgggccccgcggtggttccccgagctcagggatgcccgccaaagctcagcacgtagacatccctctgagactgctggtacccacacagtacgtcggtgccatcattggcaaggagggagccaccattcgtaacatcaccaagcagacagcgagcaagattgacgtgcatcgcaaagagaacgcaggtgctgctgagaagccgatcagcatccactccacccctgagggctgctcggccgcttgccgcatgatcctggacatcatgcagcaggaagctaaagacaccaagactgctgatgaggttcctctaaagattctggctcataataactttgttggacgcctgattgggaaggagggacgcaacctgaaaaaagttgaacaggacacagacaccaagatcaccatctcacctcttcaggacctgacactgtacaatccagagagaaccatcacagtcaaaggcccgattgaagcctgctgcctagctgaggtggaggtcatgaagaaggtcagagaggcctatgagaacgacatcgctgctatgaatcaacagacccacctgatacctgggctcaacctgggtgctctgggcctcttcccctcctcctccaacatgccgccacccccgcctggaaactccacctctggtgctccctatggttgctttggggctccagaacaggagactgtccacgtatacatcccagcacaggcagtgggagccatcattggaaagaaagggcagcacatcaaacagctgagccgcttcgctggggcctccatcaagattgccccagctgaagctccagactctaaaatgaggatggtgattgtgacaggaccccctgaggcccagtttaaggctcagggcagaatttatggcaaactgaaggaggaaaacttctttggaccaaaggaggaggtcaaactggagactcacatcaagatggctgctgccgctgcagggagggtcattggcaaggggggcaagacggtgaatgagctccagaacctgacagcagctgaagtggtggtccccagggaacagacaccagatgaaaatgaccaggtcatcgtcaagatcaatggacatttctacgcaagccagttggctcagagaaagatccgggacatcctgacccaggtcaaacagccacagaaaggtgggatgggcatgggctctggctcaaacccccagggcttcacagagatgggcagccctacacaaggactgactcaggatcaacagccacgcaggaagtgagggtacccccaacctcctcacatgccgtgggccccccaacacctgacggacagacggatagacacatgcacggacggatagacagacgaatggacggacacaggagagcgacacacggacccagcgatagacagggagagatataaagagggagggagtacgcccgatagccagagagaaagatcagagtttagagagaaagagaggagatgaataaaatcacaacgaagaaatgaattaaaaaagag
>ENSSAUG00010002541|jag1b
tcagtcagtcagtcagcagtgggctcggctgccgcatggccactgtgagaaaacttttcctcttctaactaacgcaacaaaagtggaggagcaaaaaactaattaaaaaaaaccccaaaacaaattaaaaccaggaaggagacgagctcggagaaaaagaggctgaggggggactctacaaggaagaggctcttctatgaatgtggaagtcgtgctccgctcatcaaagtggtgtttcccactcgtgcatgtttaaaccagaggagagctctggtgccgtgtgtcggccagacgaccagtactaaacgagaggcaacagcagtccggaggcatgattctgagacggggctcagtcgttgctgcctttttgctctgctttctcgccaaggtgtcagagggatccggacaattcgagttgcaaatcttatcgatgcacaatgtgaacggagagctgttcagcggcatgtgttgtgatggctcgcggaccacggcggatagaaaatgcacgcgggacgagtgcgacacgttttttaaagtttgcctgaaggaataccagtcgagggtttctgctgcagggccctgcagcttcggaatgggatctacgcctgtcctcggagggaataccttttctttcaggagctcagtcaggaatgacaaatcccggatagttttgcccttcagttttgcctggccgaggtcctacactttgatagtggaagccttggacttcaacaatgaaaccagtggcgcagatgggaagctgattgagaaagcctctcattccggcatgatcaaccccagcccgcattggcagaagctgacacacaacggcccggtggctcagttcgagtatcagatccgggtcagctgcgacgagcactactacggcttcggctgcaacaagttctgtcggcccagagacgagttctttgggcattacacgtgtgactataacggaaacaagacctgtctggaaggctggtctggacctgactgcaacacagcgatatgtagacaaggctgcagcactgaacatggattttgtaaggagccagggggatgcaagtgtctgtatggctggcagggccagtactgtgacaagtgcatccctcaccctggctgtgtacatggcacctgtgtagagccatggcaatgcctgtgcgacaccaactggggcggccacctttgcgataaagatctgaactactgtggcactcaccagccatgcctgaatggagggacatgcatcaacacaggacctgacaagtaccaatgtacgtgtgctgagggctactctggtgccaactgtgagagagcggaacatgcctgtctgtccaatccatgctccaatggagggagctgttcagaaaccagccaaggttatgaatgtcagtgtgcgccaggctggagcggcccctcctgcaccatcaacattgacgactgctctccaaacccctgtaatcacggaggaacctgccaggatctggtgaacggctacaagtgtcactgtccttcacagtggacgggaaagacgtgtctgatagatgccaacgaatgcgatagcaagccttgtgacaatgccaactcatgccgcaacctgattggtggatacttctgcgagtgcatccctggttggatggggcagaactgcgacatcaatataaatgattgcaaggaccagtgccagaatgggggaacttgcaaggacttggttaatggctatcattgtgtgtgcccccctggcttcgctggcgagcattgcgagagggacatcgacgaatgcgcgagctcgccgtgtctgaacggcgggcgctgtcaggacgaagtgaacagcttccagtgcctgtgtctggctggcttttcaggaaatctgtgccagctggatatcgattactgctccccaaacccgtgtcagaacggagccccctgcttcaacctggccacggactactactgcgactgccccgaagactatgagggcaagaactgctctcacctcaaagaccactgtcgcaccaccacatgtaaagtgattgacagctgcactgtcgctgtggcgtctaacagcacaccaggtggggagcgctacatttcatcaaatgtgtgcggaccccatggtcagtgtcgcagccaggccgggggtcagttcagctgcgagtgtcaggagggcttcagaggcacctactgccatgagaacatcaatgactgtgagagtaatccatgcagcaatggaggcacctgcatcgacaaagtcagtgtgtaccagtgcatctgccgcgacggttgggagggcgaccattgcgagatcaacatcgatgactgcagcaccagcccctgtcataatggagggacatgtcgagacctggtgactgatttcttttgcgagtgcaaaaatggctggaagggaaagacgtgccactcccgtgaaagtcagtgcgatgaggccacatgcaacaatggtggcacctgccacgatgagggcaacacgttccaatgcaagtgttccccagggtgggagggtacaacatgtaacatagccaaaaactcaagttgtcttccaaacccgtgtgagaatggaggtacctgtgtggtgactggagagtcgttcacctgcgtctgcaaagaaggatgggaaggtcccacgtgcacccagaataccaacgactgcagtccccacccatgctacaacagcggaacctgtgtcgacggggataactggtaccgctgcgagtgtgcctcaggcttcgctggtccagactgtcggatcaatattaacgagtgccagtcctctccatgtgcctttggctctacctgtgtggacgagatcaacggatatcgctgcctgtgtccaccagacaggactggaccccactgccaagaagtgacaagaaagcattgctctgtgaatggacacgtcacccctgatggagtcaaatgggacgaagactgcaacacttgccactgttccaatgggaaagtggtgtgcacaaagatgtggtgtggtcctacatcgtgccacctgggtgccaaaggtcgaggcgggtgtccttcaggccaaaactgcatccccatcagagagggccactgctttgtgaagccctgcctcgttttcggcgagtgctggcgctccaaccctcccccgcctcccaccaaatgccaccccagctccagttaccaggacaacagctgcgccaacatcaccttcaccttcaacaaggagaccatgactcaaggctcgtctgtggaggatgtatgcaagcagctgaggcgcttgtacgtagtgaagaatttctccttggagcattctgtgtccataacctgtgacccctcattctcagccagcaacgagatccacgtctgcatctcaaccgaggaccatcgcctagaccggaaccctattaaagagatcacagacaggataattgacctgattagcaaacgcaacgggaacaacactatcatcagcgccatcgtagaggtgcgcgtgccaagccccagcaaaactgactaccttgtgccactcctcagctccatcttcatcgtcatctgggtgctcgtgctcgtcagcattttgctgtggtgcatgcggcgacggcggaaacagagcaaccataacgggacgacggccgccggctccgaggacaacacgaccaacaacgtgcgggagcagctgaaccagatcaagaaccctatagagaagcacgtgggcctcactgtggccatcaaagactatgaaaacaagaactccatcattgccaaaataaggacaaatcatcccgagggggatgaggacgacaaggagaggcacttacagaagggccgctttgccaaacagccagcatacacactggtggagagggacgagaagacgcccatctccaatcccaactccacgtccaaaaatcctaattggactaataaacagagatcggaagaaatgtcttggatttatgttggcagaagacatggcccctctttgacatgttcacttggtgcaaaacacacccaacacagcacacatatataaatacaataacccatagagataactcagatacaaacacttgcactgaaggaccttggaatgttaaaagctgttgatggctcatttgaagtgccaacagctgaggctgttacgctgttcttactgctgtctgttggcggaagcccctgtgatttcacattggcaccagctcaaacgccgcctcatacaagaccccccaatcccccctcccatgccatcccacacatagcaccacacttcatccgcctattcttggccccaacatcagtgctgctaccctcgcttgacacctttctctacatgcaacaatgtgcacgtgttccgactcactccaggctatctgcactcaaataacataatgagacacacacggatgcaaataggtcttctgctgaaacgaatacacgcttccactcgctgctacggacagtctgaaagtcttgcgaggattagcaggttagcatttgacctggttgcagaatagacgacccctatacttaatacccgccctgagacttgctgggcttccctccctaagcctatagcctgtcctcccctttttatggctcctgcctgcctgcttatttctcacagtcacaatctccaccttttctgctctgctgcctccctcacatgggacaatgaaaagaccaagaatgtcattacactcacttaagacctttaataagactagagcgcatgagctgtgtaggcctgttttaggccgcaataccttttcatgttgcgagagaggggaaaattctccgatatggtgtggagtcatgttccactggttacattctttttggcaaagctgtgaggagcctaatcatttttacatgcatatttccctgctgaaatactgatagtccccttgttcgcacagtggagcaaatttgtgcatgtaagtgtgtgtgtgtgtggagcctcagtctgtgatctccttcattagagatgtctgtctctcctc
>ENSSAUG00010005040|mapk1
gtccatccatccatccatttatccattgtctgtaaccgttttatcccttttatggggtctctggggttgttgcgggagcaacatccaagctgtctctgggcgagggttagggtacaccctggacaagtcgccagctcatcgccacgcaaggtgccagccgcacatcaggagcaattttgatttcagtatcttgctcaaggacacttcgacatgcagctcagctcagcccgcagctgggatttgaacctgggattataacactatatataataactgttacatttgtatgcagctaatcaataaatgcaatactttatgtagcctacattttttctgattatatctgtagcatcattcttcagtgcggcacttttacttataatggagtactttcacagtgtgggaataagtacttttattgcagtgaaggatctgagtacttcatccacctctcactggatctaacaccttactgtttggtttattctattctactatgtagaagcagtacctgaaagcgacactggtcatcccaaaagaacagaaagaagaagggaaagaaaaaaaggaaaaagagaaaacaccggatcacatgaccgccttcgttatttcctgcagcagcagcggcagcctctccgctcctcgccctgcctgcctgcctgcgacagcacagcagtggtgtggtcgcgctgaacgcacgctaacggaaggaaaaaacactccacacgtagtgaaggcctctgccaaactgaaagctctgtttcagtcacagcgacgacggatataaactgacacacacatatatattttttttctaatctcagtcgctctttttttatttggtagcgttgtaaaaggccagtcctcataatggcgacagctgcggtgtctgcccctgctggctgcggccccagccccgggtcgggaacggagctggtccgcgggcaggccttcgacgtcgggcctcggtacagcaacctctcctacatcggggaaggagcctacgggatggtgtgctctgcctatgaccgagacaacaagatacgtgtggccattaagaagatcagcccctttgagcaccagacatactgccaacgtaccctgagagagatcaaaatccttctgcgcttcaaacatgagaacatcatcggaataaacgacatcatccgcacaccaaccattgaccagatgaaagacgtatatattgtgcaggatctcatggagacagacctgtacaagctcctgaagactcaacacctgagcaacgaccatatctgctacttcctctaccagatcctacgagggctcaagtacatccactctgccaacgtcctgcatcgcgacctgaagccttccaacctcctgcttaacaccacctgtgatctcaagatctgtgattttggtttggctcgcgtggctgatcctgaccacgatcacactggcttcctaacggagtatgtagccactcgttggtaccgagcacctgagatcatgctcaactccaagggctataccaagtccatagacatctggtcagtgggttgcatcctggctgagatgttgtccaacagaccaatttttccagggaagcactacttggatcagcttaaccacatattggggatcctcggttctccctctcaggaggatctcaactgcatcatcaacgtcaaggccaggaactatcttttgtcacttcctttgcgctgcaaagtgccgtggaaccgccttttccccaacgctgatcccaaagctctggacctgttggacaagatgttgacctttaaccctcacaagaggatcgaggtggaggcggccctggcgcacccctacctggagcaatattacgacccaacagatgagcctgttgctgaggccccattcaagtttgacatggagctggatgacctacccaaagagacactgaaggagctcatctttgatgaaactgcacgtttccatgtgctgattcattcgtgctaa
>ENSSAUG00010002312|PAX7
cctggtgtgctgtgcaggcaggcagatgtgctggtgtggaggctgcagagcctattgtctatgttagagacctatgacgagtttcagtgtgagtgggttgtgaatctctctctctctctctctctctctctctctctctctctttctctgtgtgtgtgtgtgtgtgtgtgtgtgtgtctttatcccttcattcccattggctgctgaaacttggtggagcttttccctcccgagtaagagaaagcctcaagaacctatcggtgctcgcgacccgtccccccttctcgagcccgcctggtccagacttgtccaggggaccgtcagatgagtccttcacaacggttaaataagctggtgtcagagacagacgcttccatacagtgaacacatgaacagtgtgaggactccatgagccctgtcagcctgactgcagtggaggtctcatattgatcttttcatatttttttctcatccatcacacaccggagcgctcacacatttccacctctgaaacacttgtagcaacacatcgacacgtgatttggacatccagacagctttcggtctttttttgcctttttttttttgtatctctccttttttttttttttttttttttttttttaaatgttacaatgtcgtctttgccaggaactgtaccgcggatgatgcgcccggctcccggacagaactacccccggactggattccctctggaagtgtccactcctctgggccagggacgggtcaaccagctcggaggtgtctttatcaacggccggccgctgcccaaccacatccgacacaagatagtggagatggcccaccacgggatccggccctgcgtcatctcccggcagctgcgggtctcccacggctgcgtctccaagatcctctgccgctaccaggagaccggctccatccggcccggagcgataggaggcagcaagcccaggcaggtagccacgccggacgtggagaagcggatcgaggagtacaagcgggacaaccccggcatgttcagctgggagatccgggataagctgctgaaggacggcgtgtgtgacagaagcacagtcccttcaggtgaggcctcctctgtgagttcgatcagccgtgtacttcgggctcggtttggaaaaaaggacgatgaggaggagtgtgataaaaaggatgaagacggagagaagaaaagcaaacacagcatcgacggcatcctcggcgacaaaggtaggtcagaggacacagttttagcactattttgccgggttgaaattgagggagacccaaatgttggctggagataa
>ENSSAUG00010003494|igf2bp1
agagagaggaaaacattttcccgatctgatcccgccatagtttttcccactcttccaccacagacccatcaccaaatccatccagtacaacccacctcctccacagtgcgatagagaggctataggctgctgctttattcgtctgctggggccgggctgcaagtcaagggattcatttctcctcctgctccacttattctactggatttacggctaaattcaacgttaccatctggttttacacttctaaaatctctttttttttattttactttcctaacgagaatttacgtttcttccgttctgtgtttctttaaaaatatttttgagatattcttgccctctagcgagatttccactttcagttagtgtgacactatcttgttgcgctattagcagattcaggagataaactttttttcgctgggttaaattctagcatttccgggctttgttttttttttcttcgttttttggacttggaaaaacaatttccaccatgcacaagctatacattgggaatctaagcgacaacgtgactgctgaggacttagggaaaacctttgacgaccacaagatcccatactccggacagtttctaatgaaaaccggctatgcgtttgtggattgtccggacgatcagtgggccatgaaggctatcgagacgttttctggtaaagtggaacttcaggggaaacgtattgaagtcgagcactcctctctctttttcctatttctctcagtgaacacagagagtgagactgctgtggtaaatgtcacatatgcatcccgggagcatgccaggcaagccatccagaagctgaatggttaccagtttgagaacaatgccctgcgtgtctcctacatccctgatgagaactctgagctggagggaagccagagggggtccgattatggccgtcgacctggctatggctcccgaggcgggccccgcggtggttccccgagctcagggatgcccgccaaagctcagcacgtagacatccctctgagactgctggtacccacacagtacgtcggtgccatcattggcaaggagggagccaccattcgtaacatcaccaagcagacagcgagcaagattgacgtgcatcgcaaagagaacgcaggtgctgctgagaagccgatcagcatccactccacccctgagggctgctcggccgcttgccgcatgatcctggacatcatgcagcaggaagctaaagacaccaagactgctgatgaggttcctctaaagattctggctcataataactttgttggacgcctgattgggaaggagggacgcaacctgaaaaaagttgaacaggacacagacaccaagatcaccatctcacctcttcaggacctgacactgtacaatccagagagaaccatcacagtcaaaggcccgattgaagcctgctgcctagctgaggtggaggtcatgaagaaggtcagagaggcctatgagaacgacatcgctgctatgaatcaacagacccacctgatacctgggctcaacctgggtgctctgggcctcttcccctcctcctccaacatgccgccacccccgcctggaaactccacctctggtgctccctatggttgctttggggctccagaacaggagactgtccacgtatacatcccagcacaggcagtgggagccatcattggaaagaaagggcagcacatcaaacagctgagccgcttcgctggggcctccatcaagattgccccagctgaagctccagactctaaaatgaggatggtgattgtgacaggaccccctgaggcccagtttaaggctcagggcagaatttatggcaaactgaaggaggaaaacttctttggaccaaaggaggaggtcaaactggagactcacatcaagatggctgctgccgctgcagggagggtcattggcaaggggggcaagacggtgaatgagctccagaacctgacagcagctgaagtggtggtccccagggaacagacaccagatgaaaatgaccaggtcatcgtcaagatcaatggacatttctacgcaagccagttggctcagagaaagatccgggacatcctgacccaggtcaaacagccacagaaaggtgggatgggcatgggctctggctcaaacccccagggcttcacagagatgggcagccctacacaaggactgactcaggatcaacagccacgcaggaagtgagggtacccccaacctcctcacatgccgtgggccccccaacacctgacggacagacggatagacacatgcacggacggatagacagacgaatggacggacacaggagagcgacacacggacccagcgatagacagggagagatataaagagggagggagtacgcccgatagccagagagaaagatcagagtttagagagaaagagaggagatgaataaaatcacaacgaagaaatgaattaaaaaagag
>ENSSAUG00010005337|cast
gtgtgtgtaaatgtgcaggttattttaccgtgttactgtgtgtggagcagtgtaaatgaacatcatgtgtgatatctaacctctccctctgcaagaccttacttgcagctctatcttaaacacgcactctcacagctgggctgcacactaaacattaagtttgtgccagctctgatcaatcatcacacgccggagaagtgtttttcagcgggaggggcaacttattattgctctgaggggcagatcagcctactctgattccccaaaaacaactgaggagcgagggcgcagagggacactttaaaaagttaatctgtccgcgttttgaagatgccacaaaaaaagaaaagccacggtcagcacaagggcgccaaggaggtcaaagaatcgcagcctagccaggccacacccaaaccagccgctcaggtctccaccgtgaagcctgctcagtacgagaaggcttcatcaggatccgccatggctacaaagcctggggtggtttccacagcgacaggtggagccacaggaagtggcgtcaaagcaggaggaagtgcttcaattgggactgcaggaaaagagtcacctaaagccaaaacagagactaacactactccggcaggcgctactgttatcgacatgtcgtccgctgaggttgctattgttgacatgacatcagtggggtcgagaggcggtcctaaagagatgtcaaagactccaccaactgtctctcaaggtaaggccgcagctacagttccctctgctgctgctggagcggctgcagcagctggtgtggcggcgaccacacctaaagagtcacccaaaggcccagccaagagtgccgctgccatcacaacactcaaggctgatgtggctaaagttgatccggttaaaacatcaaagtcaacggcagcagccaaggtgcaggtggaggttcctcccacggcagccaaaggagcaaaagaggcacctgccgtggatccatttgatgccctggccagcatactgccatcagctgatcccgtcgcaccagagcctgtttacacggggccagaggtcaaagagcatgacgtcatctctgagaagggtcataagtgtggcgaaagagacgacacgctgcctccaggctacagatttaaagatatgcctgctgtccctgccgatgtcaaaccgaaggacgtccctaaaccactgagcacagacgaggccctggattctctttcagctggtttcatgtcttctaccactccagctgcaggcatgcagccagagaaaaagggccacgtcgacgttgtcagcgcctcatctgccggccctgctaacttcgcaccacctcctgtgcagaaatctcaaacctctgccgcagctcctcctgctgataaaaaagccaggatggagaaagcttctgatgatgtctctcagaaggctgggcgcccctctgctccttccaagagcgcaatgcctcaggacgctctcagtgctctcgttgactcgttgccagcagacataccaaaacctgaaccccccaaactcagacctgaggacatggtctcggagggtaaacacaagaaggagaagggtgttcttgtaggagagagggacgatacaattcatccgaactacaggtttgatgaggagaaactcaaaaaactgcctgctcccaaacctgagcccaaaatagccactagtgatgctctggactttttgtctgaaggcttcctggactcctcagtggctcctgtacagaaagcccctcctgttgctgtgtgtcctgctcctgctgataaaaaagccaagatggagaaagtcggtgatgatttctctctggaggccggactctctgcttcgacggccaagaaagtggaatcctgtgccgtcccccctgtggctgtgtgtctctctcctgctgatcaaaaagccaaagcagggaaaagtgctgccggaaaggacagcactgacggcaagctcaagaccgatctgggaaacatgcctctggacgctctcagtgctcttggtgactcgttggcagcagacaccccaagacctgaactccccgaagtcaaacctgaggacatggtctcggagggtaaacacaagaaggagaagggtgttcttgtaggagagagggacgatacaattcatccaaactacaggtttgatgaggagaaactcaaaaaactgcctgctcccaaacctgagcccaccttggcccccggcgaggctctggactttttgtctggagacctgatgacctcctcagcagctccctctgtccaggctcccgttgtcaccccctcagctcctcctgcacagaccaaagtagaggatttgtcagctctggatttactttcggacgattttgtggctccaaccaaagcttcaggagtccaggcccctgtccctccttctaccaagaagaagacaccagagaaaacggtttgtcccagctcagttgatgtcgctcctgcaaaacccaagactgacgactctttgtctctggacgctctcagtgctctcggtgacacactggcagcagacacaccaagacctgagctccccgaagtcaaacctgaggacatggtctcggagggcaaattcaaggaggagaagggtgttcttgtgggagagagggaggacacacttcctccagagtacaggtttgataaggacaaactccaaaagctgcctgctcccaaacccaagcccaccattggtactggagacgctctggactttttgtctggagacctgatgacctcctcagcagctcctgctgtccaggctcccgttgtcaccccctcggctcctcctgcacaggcctctgatgacttcgccctggatgccttggcaggagactttgtttccaccgctgctgctccagtagttaagtctggttttgctcccccaaagactgcccggcagctgtcagggggaacagacagcgccctggacgctttgtcagacaccttgaaggatatcacacccgcaccccagcccgccccggtcccgagtaaagacttcgtcaaggagaaaaagattgttgaagagaagctgataaagatgggagagagagacgactcgctgccgccagagtttcgacccacagaggaagagcgtaagaaaattgaagaatcaaagaaaaaggcagccgcagcacccaagcagtctatggatgataaaacagccttggacctgcttgccggtgatttcgaaactgctccaaagcccgctgcagctgccacatcgtgtgcagccgcgacaaagctggaacctcctgtgctggactcagatcccctgaagccaatggccggtcctgtcctggacaacctggcaagcacgctgctcccagaggcggtcaaaacaaagacagacaaaccaaagaaacaccacgcagaggagccatctgccaccgacctgctagcaggtcagctcagctcagacgtcgtgccaacatctacaaagaagggaggcaagagctagaccacttggtcggcggtgtaattcgtcctcccggccacaggggcgtgtcagcgagggggagcagctcgatggcgacgattctatttttctaaattgtcaagaatgtacagtttatgtgctggatgagagatgaacttaagacacacccatatcacttgctcgacacacacagacacacacagacacatacacacacggagctctgcctgcggcgcctttcttgctcggtttcgcctgtatttaaggatgagaggcttgtggtgtcaatgagatattttttttttttttaaactagatggagaatgagaaggggaagtgtgcagggacatagaggaattgaagacaagtgaaaatgttaaggttttttttctggttggtgtgatgagcttgccgaaggaagaaaggcgctgctcgtcagagtcctgcgcgcacatctcagctgacggtttccatggctcaagcgccactgatgtcacgcctcactgctcctgtgagctgtgacattggtcagcgcagcggtgactgtcagctggcctgggagcagtgaggagtgggtgtatagtatcgggatgtttgtgcaatcttgatgtacacagaaaaaaagccaagttttcttcttttttttttatcacgatgtggtcagacgccttaaggacactagtgtacagcttagtttgcttgtatttttggacaacacatagtttacatgatatctggaggattttccaggaggtgatctgcttaaatccgtattcgagagcttctcgcaaatgcctttaactttctggagagaactgtatgtcatgaggagggtctgtatgtatttggctgtgtagagaaaaaaaaaagaaatgctggcgtccaaaagtgcacttagtgagctgaggtggttacaagctttggaaactgcctttatttgtatactgtacacataaataaaaaaataaaaaaagattttttttgctctaca
>ENSSAUG00010002070|akt2l
agagagtccatggtgttttcctgggtggatggcctgcactggatctagcctgtcaaaactgcagtggaactagagcaacgagggataaagtcggaataatgggctgttcagatctagataactgtgactgagacttgaagggcttgcagagaagtccacagttcccctacctgacctcttgttcctgacactctttgaaacacatctcttaccatgaatgaagttaatatagtcagagaaggttggctgcataaaagaggtgaatatatcaaaacatggaggcccaggtatttcatcctgaagagtgatggttccttcattggttataaggagaaacctgatctaaatgaccagactttaccaccactcaacaatttctcagtggcagaatgccagttaatgaagactgaaagaccccggcccaacacatttgtcatacgttgtctacagtggaccactgtcattgaacgtacttttcatgtggacagtaatgaggagagagaggagtggatgtgggcaatccagtctgtggcaaatagtttaaagatgcgggaacaggaggaggaagagccaatggatgtgttcggctcacccagccaatgcagcttggaggagatggaagtggctatgtctaagagcggcaccaaagtgacgatgagtgactttgagtacctgaagctgcttgggaaggggacgtttgggaaggttattctggtcaaagagaaatccatgggagtccattatgccatgaaaatactgcgcaaagaggtcattatagccaaggatgaggtggcccacacagtaacagagagcagagtgttacaaaacacacgacaccccttcctcacgacactgaaatatgccttccaaacccacgatcgactctgttttgtcatggaatacgccaacggaggcgagcttttcttccacctttcacgcgaacgagtgttcacagaagaccgggcacgcttctacggtgcagagattgtgtcagcacttgagtacctccattcacgtgatgttgtttaccgtgatctgaagctggagaatctgatgctggacaaagacggccacatcaaaatcactgattttggtctttgtaaagagggcattacccctgatgctaccatgaaaaccttctgtggaactcctgaatatctggcacctgaggtcctagaagataatgactatggcagggcagtggattggtggggtctgggtgtcgtcatgtatgagatgatgtgtggccgtctgcctttctacaaccaagaccatgagcgtttgtttgaactcatcctcatggaggagatccgtttccccaggaacctgtcacccgaagccaagtctctgctggcaggtcttctcaagaaggaccccaaacagaggttaggtggaggtcccgatgatgccaaagaagtaatgactcacaaatttttcatcaccataaactggcaggatgttacattcccaccaaaattagctggtctacaaaggttttttaactctggtcgaggatccctgcctaccaccatagcctatctaacgctgaatttaatagtggcgttttactactaa
>ENSSAUG00010003494|igf2bp1
agagagaggaaaacattttcccgatctgatcccgccatagtttttcccactcttccaccacagacccatcaccaaatccatccagtacaacccacctcctccacagtgcgatagagaggctataggctgctgctttattcgtctgctggggccgggctgcaagtcaagggattcatttctcctcctgctccacttattctactggatttacggctaaattcaacgttaccatctggttttacacttctaaaatctctttttttttattttactttcctaacgagaatttacgtttcttccgttctgtgtttctttaaaaatatttttgagatattcttgccctctagcgagatttccactttcagttagtgtgacactatcttgttgcgctattagcagattcaggagataaactttttttcgctgggttaaattctagcatttccgggctttgttttttttttcttcgttttttggacttggaaaaacaatttccaccatgcacaagctatacattgggaatctaagcgacaacgtgactgctgaggacttagggaaaacctttgacgaccacaagatcccatactccggacagtttctaatgaaaaccggctatgcgtttgtggattgtccggacgatcagtgggccatgaaggctatcgagacgttttctggtaaagtggaacttcaggggaaacgtattgaagtcgagcactccgtccccaaaaagcaaaggaccaggaaattgcagatcagaaacattccacctcacttgcagtgggagtctctctttttcctatttctctcagtgaacacagagagtgagactgctgtggtaaatgtcacatatgcatcccgggagcatgccaggcaagccatccagaagctgaatggttaccagtttgagaacaatgccctgcgtgtctcctacatccctgatgagaactctgagctggagggaagccagagggggtccgattatggccgtcgacctggctatggctcccgagctcagcacgtagacatccctctgagactgctggtacccacacagtacgtcggtgccatcattggcaaggagggagccaccattcgtaacatcaccaagcagacagcgagcaagattgacgtgcatcgcaaagagaacgcaggtgctgctgagaagccgatcagcatccactccacccctgagggctgctcggccgcttgccgcatgatcctggacatcatgcagcaggaagctaaagacaccaagactgctgatgaggttcctctaaagattctggctcataataactttgttggacgcctgattgggaaggagggacgcaacctgaaaaaagttgaacaggacacagacaccaagatcaccatctcacctcttcaggacctgacactgtacaatccagagagaaccatcacagtcaaaggcccgattgaagcctgctgcctagctgaggtggaggtcatgaagaaggtcagagaggcctatgagaacgacatcgctgctatgaatacagacgtcagtgaacatcacctttttaatacattggctccagaacaggagactgtccacgtatacatcccagcacaggcagtgggagccatcattggaaagaaagggcagcacatcaaacagctgagccgcttcgctggggcctccatcaagattgccccagctgaagctccagactctaaaatgaggatggtgattgtgacaggaccccctgaggcccagtttaaggctcagggcagaatttatggcaaactgaaggaggaaaacttctttggaccaaaggaggaggtcaaactggagactcacatcaagatggctgctgccgctgcagggagggtcattggcaaggggggcaagacggtgaatgagctccagaacctgacagcagctgaagtggtggtccccagggaacagacaccagatgaaaatgaccaggtcatcgtcaagatcaatggacatttctacgcaagccagttggctcagagaaagatccgggacatcctgacccaggtcaaacagccacagaaaggtgggatgggcatgggctctggctcaaacccccagggcttcacagagatgggcagccctacacaaggactgactcaggatcaacagccacgcaggaagtgagggtacccccaacctcctcacatgccgtgggccccccaacacctgacggacagacggatagacacatgcacggacggatagacagacgaatggacggacacaggagagcgacacacggacccagcgatagacagggagagatataaagagggagggagtacgcccgatagccagagagaaagatcagagtttagagagaaagagaggagatgaataaaatcacaacgaagaaatgaattaaaaaagag
>ENSSAUG00010002636|capn5b
aatgactttattttgatgccttgagtgcaagacttcctgttttggtgccgcgcgctacgcggaagcttgacgctgctcgggtgaggagaggagagagcagctccgccagcggaccaggaggagagcgtggtgaggaatcccagcagccccaggagagtgagagccggaccggctggacccccggaggaggacccgagagagaaccacgttgccacgggagaggcctcacttcagggctgcagtatgttcacttcagtgaaggccttcgaggggcagcagtactccaccctgaagagacagtgcttgcagagtggtctactctttgaggacccccgcttccctgccatcgatgactcgctcttctaccagggcaacaggatcgggcgtgtagtctggaagaggcctcgggagctgtgtgaagaccctcacctgtttgtcgatggcatcagcgcacacgatttacatcagggacagctgggtaactgctggttcgtcgctgcctgctccagcctggcctccagagagtctctatggcaaaaggtcattcccgactggaaggagcaggagtgggacacggagaagccagactcttacggggggattttccactttcgcttctggcgcttcggtgagtgggtggatgtggtgattgacgatcggctaccgactgtggacaaccagctggtctactgccactccaacgacagcaacgagttctggagcgccctggtggagaaggcgtacgccaaggtttatggctgctacgaggctttggatggggggaacactgctgacgcgctggtggatttcacaggtggtgtttcagagccggtggacctgctggagggtcagatggcgacagacgagctggcccgaaaccagctgtttgaaagagttctcaaagtccataacagagacggtctcatcagctgctccatcagggcgaccacgatcgaggacatggaggcacggctggactgtggcctggtcaaaggtcatgcctacgctgtgacagacgtacggaaagtgcggctaggtcacggactgctggccttcttcaagtcggagaagctgcatatgatccgtatgaggaacccctggggagagaaggagtggagcggcccctggagtgacagttcggaggagtggaacaaggtgagcaagagcgagagagaaaagcttggcgtcaccgtgcaggacgacggcgagttctggatgacgttcgacgacttctgccagtacttcacggacctgatcctgtgccgcctcatcaacacctcctacctgagcatccacaaaacctgggaggaggaggtgatgaggggctcctgggtccaccgccaggacccccttcgcaaccgctctggaggctgcatcaatcacaaggccaccttcctgcagaacccccagtacgtgtttgatgtgaagaaggtggaagatgaagtgctgatctgcttacaggcaaaggggaaaacctcgccattggtggagcttaatcgaaagtaccgtatgcactcagcccagcagaaagtagcgggctccatctacatcaactcccgctgcgtcttcctcaggaaggagctgaaggagggccgttacgtcatcattcccacaacctttgaccccgggcagcagggcgacttcctgctccgtgtcttcactgatgtgccttcagactgcaaagagctgactctggacgagcctcctcagacatgttggacggggatgtgtggctaccctcagctggtcactcaggtccatgtactgaacgctgagggtctgcagggacaggactccaatggagctgtagatccctacgtgatcatcaactgtgaaggagagagggttcgttcaccagttcataaggacacacggtgcccaagcttcgacatcaaaggcctgttttaccgcaagaaacccaaggagggcatccacatcgagatctacaacaagaacatgatcgtagacaccttcctgggtcaggtgatcctgttcagcgaccccaacgagcggcaggagcagcacacgcttcacctccgcgacaagggcagccgccaggacaacgacctcccgggcacgctcactgtgcgcctcatcacctcaaccgcgctcaacaacatctga
>ENSSAUG00010002541|jag1b
gggactctacaaggaagaggctcttctatgaatgtggaagtcgtgctccagggatccggacaattcgagttgcaaatcttatcgatgcacaatgtgaacggagagctgttcagcggcatgtgttgtgatggctcgcggaccacggcggatagaaaatgcacgcgggacgagtgcgacacgttttttaaagtttgcctgaaggaataccagtcgagggtttctgctgcagggccctgcagcttcggaatgggatctacgcctgtcctcggagggaataccttttctttcaggagctcagtcaggaatgacaaatcccggatagttttgcccttcagttttgcctggccggtgagttggatactttcaaacaaaacaaaaccaaaagaaagaaaactgattgagaaagcctctcattccggcatgatcaaccccagcccgcattggcagaagctgacacacaacggcccggtggctcagttcgagtatcagatccgggtcagctgcgacgagcactactacggcttcggctgcaacaagttctgtcggcccagagacgagttctttgggcattacacgtgtgactataacggaaacaagacctgtctggaaggctggtctggacctgactgcaacacagcgatatgtagacaaggctgcagcactgaacatggattttgtaaggagccagggggatgcaagtgtctgtatggctggcagggccagtactgtgacaagtgcatccctcaccctggctgtgtacatggcacctgtgtagagccatggcaatgcctgtgcgacaccaactggggcggccacctttgcgataaagatctgaactactgtggcactcaccagccatgcctgaatggagggacatgcatcaacacaggacctgacaagtaccaatgtacgtgtgctgagggctactctggtgccaactgtgagagagcggaacatgcctgtctgtccaatccatgctccaatggagggagctgttcagaaaccagccaaggttatgaatgtcagtgtgcgccaggctggagcggcccctcctgcaccatcagtaagattgcactcaacctgcacccattaaatgtcttctgcacatgcaaatgccacacactctctctctctccctctctagatgccaacgaatgcgatagcaagccttgtgacaatgccaactcatgccgcaacctgattggtggatacttctgcgagtgcatccctggttggatggggcagaactgcgacatcaatataaatgattgcaaggaccagtgccagaatgggggaacttgcaaggacttggttaatggctatcattgtgtgtgcccccctggcttcgctggcgagcattgcgagagggacatcgacgaatgcgcgagctcgccgtgtctgaacggcgggcgctgtcaggacgaagtgaacagcttccagtgcctgtgtctggctggcttttcaggaaatctgtgccagctggatatcgattactgctccccaaacccgtgtcagaacggagccccctgcttcaacctggccacggactactactgcgactgccccgaagactatgagggcaagaactgctctcacctcaaagaccactgtcgcaccaccacatgtaaagtgattgacagctgcactgtcgctgtggcgtctaacagcacaccaggtggggagcgctacatttcatcaaatgtgtgcggaccccatggtcagtgtcgcagccaggccgggggtcagttcagctgcgagtgtcaggagggcttcagaggcacctactgccatgagaacatcaatgactgtgagagtaatccatgcagcaatggaggcacctgcatcgacaaagtcagtgtgtaccagtgcatctgccgcgacggttgggagggcgaccattgcgagatcaacatcgatgactgcagcaccagcccctgtcataatggagggacatgtcgagacctggtgactgatttcttttgcgagtgcaaaaatggctggaagggaaagacgtgccactcccgtgaaagtcagtgcgatgaggccacatgcaacaatggtggcacctgccacgatgagggcaacacgttccaatgcaagtgttccccagggtgggagggtacaacatgtaacatagccaaaaactcaagttgtcttccaaacccgtgtgagaatggaggtacctgtgtggtgactggagagtcgttcacctgcgtctgcaaagaaggatgggaaggtcccacgtgcacccagaataccaacgactgcagtccccacccatgctacaacagcggaacctgtgtcgacggggataactggtaccgctgcgagtgtgcctcaggcttcgctggtccagactgtcggatcaatattaacgagtgccagtcctctccatgtgcctttggctctacctgtgtggacgagatcaacggatatcgctgcctgtgtccaccagacaggactggaccccactgccaagaagtgacaagaaagcattgctctgtgaatggacacgtcacccctgatggagtcaaatgggacgaagactgcaacacttgccactgttccaatgggaaagtggtgtgcacaaaggtatgcctgaacaaaacaagctctgcgtatgtactaaatgtagagggtgaggtatttatgatggctctatacagcgggtgtccttcaggccaaaactgcatccccatcagagagggccactgctttgtgaagccctgcctcgttttcggcgagtgctggcgctccaaccctcccccgcctcccaccaaatgccaccccagctccagttaccaggacaacagctgcgccaacatcaccttcaccttcaacaaggagaccatgactcaagtgagttacctaggcagcagggagggagagattgaattaaagggttttagggggtcgttttcacttgtgctcaaccatcgctccttgtctgagactactgaacaattcagtcacatctccaaacgtgttccaggaagaaaaaatgtgggaatatctctgtcttctctctctgttttttctcacactagtataacagggcggtctagcagctactaccttgtgccactcctcagctccatcttcatcgtcatctgggtgctcgtgctcgtcagcattttgctgtggtgcatgcggcgacggcggaaacagagcaaccataacgggacgacggccgccggctccgaggacaacacgaccaacaacgtgcgggagcagctgaaccagatcaagaaccctatagagaagcacgtgggcctcactgtggccatcaaagactatgaaaacaagaactccatcattgccaaaataaggacaaatcatcccgagggggatgaggacgacaaggagaggcacttacagaagggccgctttgccaaacagccagcatacacactggtggagagggacgagaagacgcccatctccaatcccaactccacgtccaaaaatcctaattggactaataaacaggacaacagagacttggagacagcaaacagcataaacaggatggactacattgtatag
>ENSSAUG00010002312|PAX7
cctggtgtgctgtgcaggcaggcagatgtgctggtgtggaggctgcagagcctattgtctatgttagagacctatgacgagtttcagtgtgagtgggttgtgaatctctctctctctctctctctctctctctctctctctctttctctgtgtgtgtgtgtgtgtgtgtgtgtgtgtctttatcccttcattcccattggctgctgaaacttggtggagcttttccctcccgagtaagagaaagcctcaagaacctatcggtgctcgcgacccgtccccccttctcgagcccgcctggtccagacttgtccaggggaccgtcagatgagtccttcacaacggttaaataagctggtgtcagagacagacgcttccatacagtgaacacatgaacagtgtgaggactccatgagccctgtcagcctgactgcagtggaggtctcatattgatcttttcatatttttttctcatccatcacacaccggagcgctcacacatttccacctctgaaacacttgtagcaacacatcgacacgtgatttggacatccagacagctttcggtctttttttgcctttttttttttgtatctctccttttttttttttttttttttttttttttaaatgttacaatgtcgtctttgccaggaactgtaccgcggatgatgcgcccggctcccggacagaactacccccggactggattccctctggaagtgtccactcctctgggccagggacgggtcaaccagctcggaggtgtctttatcaacggccggccgctgcccaaccacatccgacacaagatagtggagatggcccaccacgggatccggccctgcgtcatctcccggcagctgcgggtctcccacggctgcgtctccaagatcctctgccgctaccaggagaccggctccatccggcccggagcgataggaggcagcaagcccaggcaggtagccacgccggacgtggagaagcggatcgaggagtacaagcgggacaaccccggcatgttcagctgggagatccgggataagctgctgaaggacggcgtgtgtgacagaagcacagtcccttcaggtgaggcctcctctgtgagttcgatcagccgtgtacttcgggctcggtttggaaaaaaggacgatgaggaggagtgtgataaaaaggatgaagacggagagaagaaaagcaaacacagcatcgacggcatcctcggcgacaaaggcagtcggatggacgaagtgtcagatgtggagtcagagcctgacctccccctcaagaggaagcagcgcaggagtcggaccacattcacagcagagcagctggaggagttggagaaggcttttgaaagaacccactaccccgacatctacacaagagaagagctggcccagaggaccaaactcactgaagccagggtccaggtgtggttcagcaatcgaagggccagatggcggaaacaagcaggagccaatcagcttgcagcatttaaccacctgttgccgggtggatttcctcccacggggatgccaacacttcctacataccagctgccagattccagctacccaacaaacactctgccccaagatggtagtggtacagttcaccgtccccagccgttacctccatccaccatgcaccagagcggtctctccagcacagacagcagctctgcctacggtatcgcctccaaccgccatggcttctccagctactccgacacctttatgagctcttccgcaccgagcaaccatgtcaaccctgtcagcaacggactctccccacaggtgatgagcattctgagtaaccccagcggtgtttcttcacagccacagcacgacttctccatatcaccactccatagtgccctggactcctctccatccaatgccatctcagcgagctgcagccagcgatcagctgagtcttccattaagacggtggacagccttccgtcatcgcagtcctactgcccccctacatacagcaccaccagctacagcatggatcccactgtggctgctgccggttaccagtacagtcagtacggccagagtgagtcctgatagttaacactaaccaataatggtaacattttgatagaagtgatatttgttttaagagtccctgtcacaaacttatttatttttctgacaatatttgaggttagaaagaggcaatgttgtaacaaaatattgattcatatttgactacccttacaaccaatcagagtgaacatgtgacatgtgtctttttaaatgaagactggtggtgctcataatatacaaaatccttgaaaagactcaaatttgtgtttatttgtataagatgcccagcaccaggccaataggcttttgtgacatgtgatgctgtattgcaaaagcctgttggcattcaccttcactgatgttatttcaatagcatatttatactgagacagggagaaaaaggagcttgcatggaggaaagtgagtgaggaagttggactacctggaaatatgtcttagcacaacatgattgatccggactccatccagggaaccaacattttaaaagtagtttgtttgtcatctagctggaccggacgaagccagaatccaggctttttacaaggcagcattacgatgttgttatttcggcatccttttgatccatttattgcagtcacataactgttttgggttcaagtcagaataattcagtcaacattgacttgttggttacaatataatacagttacacctattaagaaactgctactcaatggagacagatggacaggcgctccacagctgaacctgtaattggtgtctggccaggaactcctggcactggtctgagccaacaggtcattgaactgggcaccagctgaagaagacaatgacattcacagagctgggcgcaccagc
>ENSSAUG00010002312|PAX7
cctggtgtgctgtgcaggcaggcagatgtgctggtgtggaggctgcagagcctattgtctatgttagagacctatgacgagtttcagtgtgagtgggttgtgaatctctctctctctctctctctctctctctctctctctctttctctgtgtgtgtgtgtgtgtgtgtgtgtgtgtctttatcccttcattcccattggctgctgaaacttggtggagcttttccctcccgagtaagagaaagcctcaagaacctatcggtgctcgcgacccgtccccccttctcgagcccgcctggtccagacttgtccaggggaccgtcagatgagtccttcacaacggttaaataagctggtgtcagagacagacgcttccatacagtgaacacatgaacagtgtgaggactccatgagccctgtcagcctgactgcagtggaggtctcatattgatcttttcatatttttttctcatccatcacacaccggagcgctcacacatttccacctctgaaacacttgtagcaacacatcgacacgtgatttggacatccagacagctttcggtctttttttgcctttttttttttgtatctctccttttttttttttttttttttttttttttaaatgttacaatgtcgtctttgccaggaactgtaccgcggatgatgcgcccggctcccggacagaactacccccggactggattccctctggaagtgtccactcctctgggccagggacgggtcaaccagctcggaggtgtctttatcaacggccggccgctgcccaaccacatccgacacaagatagtggagatggcccaccacgggatccggccctgcgtcatctcccggcagctgcgggtctcccacggctgcgtctccaagatcctctgccgctaccaggagaccggctccatccggcccggagcgataggaggcagcaagcccaggcaggtagccacgccggacgtggagaagcggatcgaggagtacaagcgggacaaccccggcatgttcagctgggagatccgggataagctgctgaaggacggcgtgtgtgacagaagcacagtcccttcaggtgaggcctcctctgtgagttcgatcagccgtgtacttcgggctcggtttggaaaaaaggacgatgaggaggagtgtgataaaaaggatgaagacggagagaagaaaagcaaacacagcatcgacggcatcctcggcgacaaaggcagtcggatggacgaagtgtcagatgtggagtcagagcctgacctccccctcaagaggaagcagcgcaggagtcggaccacattcacagcagagcagctggaggagttggagaaggcttttgaaagaacccactaccccgacatctacacaagagaagagctggcccagaggaccaaactcactgaagccagggtccaggtaatacatccaaatcagcaagaaattaggttacattgcaatgttcacagtagtccttga
>ENSSAUG00010005040|mapk1
gtccatccatccatccatttatccattgtctgtaaccgttttatcccttttatggggtctctggggttgttgcgggagcaacatccaagctgtctctgggcgagggttagggtacaccctggacaagtcgccagctcatcgccacgcaaggtgccagccgcacatcaggagcaattttgatttcagtatcttgctcaaggacacttcgacatgcagctcagctcagcccgcagctgggatttgaacctgggattataacactatatataataactgttacatttgtatgcagctaatcaataaatgcaatactttatgtagcctacattttttctgattatatctgtagcatcattcttcagtgcggcacttttacttataatggagtactttcacagtgtgggaataagtacttttattgcagtgaaggatctgagtacttcatccacctctcactggatctaacaccttactgtttggtttattctattctactatgtagaagcagtacctgaaagcgacactggtcatcccaaaagaacagaaagaagaagggaaagaaaaaaaggaaaaagagaaaacaccggatcacatgaccgccttcgttatttcctgcagcagcagcggcagcctctccgctcctcgccctgcctgcctgcctgcgacagcacagcagtggtgtggtcgcgctgaacgcacgctaacggaaggaaaaaacactccacacgtagtgaaggcctctgccaaactgaaagctctgtttcagtcacagcgacgacggatataaactgacacacacatatatattttttttctaatctcagtcgctctttttttatttggtagcgttgtaaaaggccagtcctcataatggcgacagctgcggtgtctgcccctgctggctgcggccccagccccgggtcgggaacggagctggtccgcgggcaggccttcgacgtcgggcctcggtacagcaacctctcctacatcggggaaggagcctacgggatggtgtgctctgcctatgaccgagacaacaagatacgtgtggccattaagaagatcagcccctttgagcaccagacatactgccaacgtaccctgagagagatcaaaatccttctgcgcttcaaacatgagaacatcatcggaataaacgacatcatccgcacaccaaccattgaccagatgaaagacgtatatattgtgcaggatctcatggagacagacctgtacaagctcctgaagactcaacacctgagcaacgaccatatctgctacttcctctaccagatcctacgagggctcaagtacatccactctgccaacgtcctgcatcgcgacctgaagccttccaacctcctgcttaacaccacctgtgatctcaagggctataccaagtccatagacatctggtcagtgggttgcatcctggctgagatgttgtccaacagaccaatttttccagggaagcactacttggatcagcttaaccacatattggggatcctcggttctccctctcaggaggatctcaactgcatcatcaacgtcaaggccaggaactatcttttgtcacttcctttgcgctgcaaagtgccgtggaaccgccttttccccaacgctgatcccaaagctctggacctgttggacaagatgttgacctttaaccctcacaagaggatcgaggtggaggcggccctggcgcacccctacctggagcaatattacgacccaacagatgagcctgttgctgaggccccattcaagtttgacatggagctggatgacctacccaaagagacactgaaggagctcatctttgatgaaactgcacgtttccagcgtgcctttaggtcctaacatttcacatag
>ENSSAUG00010002636|capn5b
aatgactttattttgatgccttgagtgcaagacttcctgttttggtgccgcgcgctacgcggaagcttgacgctgctcgggtgaggagaggagagagcagctccgccagcggaccaggaggagagcgtggtgaggaatcccagcagccccaggagagtgagagccggaccggctggacccccggaggaggacccgagagagaaccacgttgccacgggagaggcctcacttcagggctgcagtatgttcacttcagtgaaggccttcgaggggcagcagtactccaccctgaagagacagtgcttgcagagtggtctactctttgaggacccccgcttccctgccatcgatgactcgctcttctaccagggcaacaggatcgggcgtgtagtctggaagaggcctcgggagctgtgtgaagaccctcacctgtttgtcgatggcatcagcgcacacgatttacatcagggacagctgggtaactgctggttcgtcgctgcctgctccagcctggcctccagagagtctctatggcaaaaggtcattcccgactggaaggagcaggagtgggacacggagaagccagactcttacggggggattttccactttcgcttctggcgcttcggtgagtgggtggatgtggtgattgacgatcggctaccgactgtggacaaccagctggtctactgccactccaacgacagcaacgagttctggagcgccctggtggagaaggcgtacgccaaggtttatggctgctacgaggctttggatggggggaacactgctgacgcgctggtggatttcacaggtggtgtttcagagccggtggacctgctggagggtcagatggcgacagacgagctggcccgaaaccagctgtttgaaagagttctcaaagtccataacagagacggtctcatcagctgctccatcagggcgaccacgatcgaggacatggaggcacggctggactgtggcctggtcaaaggtcatgcctacgctgtgacagacgtacggaaagtgcggctaggtcacggactgctggccttcttcaagtcggagaagctgcatatgatccgtatgaggaacccctggggagagaaggagtggagcggcccctggagtgacagttcggaggagtggaacaaggtgagcaagagcgagagagaaaagcttggcgtcaccgtgcaggacgacggcgagttctggatgacgttcgacgacttctgccagtacttcacggacctgatcctgtgccgcctcatcaacacctcctacctgagcatccacaaaacctgggaggaggaggtgatgaggggctcctgggtccaccgccaggacccccttcgcaaccgctctggaggctgcatcaatcacaaggccaccttcctgcagaacccccagtacgtgtttgatgtgaagaaggtggaagatgaagtgctgatctgcttacagcaaaaagaaaagagagccacacccaaagagggcaaaggggaaaacctcgccattggctttgatattcaccgggtggagcttaatcgaaagtaccgtatgcactcagcccagcagaaagtagcgggctccatctacatcaactcccgctgcgtcttcctcaggaaggagctgaaggagggccgttacgtcatcattcccacaacctttgaccccgggcagcagggcgacttcctgctccgtgtcttcactgatgttcacgtccactctctgtctcccagagagctgactctggacgagcctcctcagacatgttggacggggatgtgtggctaccctcagctggtcactcaggtccatgtactgaacgctgagggtctgcagggacaggactccaatggagctgtagatccctacgtgatcatcaactgtgaaggagagagggttcgttcaccagttcataaggacacacggtgcccaagcttcgacatcaaaggcctgttttaccgcaagaaacccaaggagggcatccacatcgagatctacaacaagaacatgatcgtagacaccttcctgggtcaggtgatcctgttcagcgaccccaacgagcggcaggagcagcacacgcttcacctccgcgacaagggcagccgccaggacaacgacctcccgggcacgctcactgtgcgcctcatcacctcaaccgcgctcaacaacatctga
>ENSSAUG00010003494|igf2bp1
agagagaggaaaacattttcccgatctgatcccgccatagtttttcccactcttccaccacagacccatcaccaaatccatccagtacaacccacctcctccacagtgcgatagagaggctataggctgctgctttattcgtctgctggggccgggctgcaagtcaagggattcatttctcctcctgctccacttattctactggatttacggctaaattcaacgttaccatctggttttacacttctaaaatctctttttttttattttactttcctaacgagaatttacgtttcttccgttctgtgtttctttaaaaatatttttgagatattcttgccctctagcgagatttccactttcagttagtgtgacactatcttgttgcgctattagcagattcaggagataaactttttttcgctgggttaaattctagcatttccgggctttgttttttttttcttcgttttttggacttggaaaaacaatttccaccatgcacaagctatacattgggaatctaagcgacaacgtgactgctgaggacttagggaaaacctttgacgaccacaagatcccatactccggacagtttctaatgaaaaccggctatgcgtttgtggattgtccggacgatcagtgggccatgaaggctatcgagacgttttctggtaaagtggaacttcaggggaaacgtattgaagtcgagcactccgtccccaaaaagcaaaggaccaggaaattgcagatcagaaacattccacctcacttgcagtgggagtctctctttttcctatttctctcagtgaacacagagagtgagactgctgtggtaaatgtcacatatgcatcccgggagcatgccaggcaagccatccagaagctgaatggttaccagtttgagaacaatgccctgcgtgtctcctacatccctgatgagaactctgagctggagggaagcgggccccgcggtggttccccgagctcagggatgcccgccaaagctcagcacgtagacatccctctgagactgctggtacccacacagtacgtcggtgccatcattggcaaggagggagccaccattcgtaacatcaccaagcagacagcgagcaagattgacgtgcatcgcaaagagaacgcaggtgctgctgagaagccgatcagcatccactccacccctgagggctgctcggccgcttgccgcatgatcctggacatcatgcagcaggaagctaaagacaccaagactgctgatgaggttcctctaaagattctggctcataataactttgttggacgcctgattgggaaggagggacgcaacctgaaaaaagttgaacaggacacagacaccaagatcaccatctcacctcttcaggacctgacactgtacaatccagagagaaccatcacagtcaaaggcccgattgaagcctgctgcctagctgaggtggaggtcatgaagaaggtcagagaggcctatgagaacgacatcgctgctatgaatgctccagaacaggagactgtccacgtatacatcccagcacaggcagtgggagccatcattggaaagaaagggcagcacatcaaacagctgagccgcttcgctggggcctccatcaagattgccccagctgaagctccagactctaaaatgaggatggtgattgtgacaggaccccctgaggcccagtttaaggctcagggcagaatttatggcaaactgaaggaggaaaacttctttggaccaaaggaggaggtcaaactggagactcacatcaagatggctgctgccgctgcagggagggtcattggcaaggggggcaagacggtgaatgagctccagaacctgacagcagctgaagtggtggtccccagggaacagacaccagatgaaaatgaccaggtcatcgtcaagatcaatggacatttctacgcaagccagttggctcagagaaagatccgggacatcctgacccaggtcaaacagccacagaaaggtgggatgggcatgggctctggctcaaacccccagggcttcacagagatgggcagccctacacaaggactgactcaggatcaacagccacgcaggaagtgagggtacccccaacctcctcacatgccgtgggccccccaacacctgacggacagacggatagacacatgcacggacggatagacagacgaatggacggacacaggagagcgacacacggacccagcgatagacagggagagatataaagagggagggagtacgcccgatagccagagagaaagatcagagtttagagagaaagagaggagatgaataaaatcacaacgaagaaatgaattaaaaaagag
>ENSSAUG00010003763|nfatc2a
atgacctctttttacgacgagagagatttggaggaagagctcactcaaatcaactgccccgatgacgatttggagtttgagtacttgtttgaatatgggacaccctgcagcgactttgcggggggagatccagatgaccccaacctcgcatcccacaaagtcctcagccccgagtctgagcaggctttccccctcgaggaggcctccccgtacggcatcaagtcctgcagcccgtcctacggtggacacagcgccgaggttctcgcgggatatgagaaccaggaggccagaaactacctggacggtacccgacctgcaggcctggccctgagcccgaggatcgagatcaccccctcccgtgagcactacacccatgactccctgcagaaccaccacctgaacattagccccagacccaccctcaccgtgcctggccatgacaacctcgcctaccgtgagccccagtgcctgagccccgccagcagcaactcctccaccagctggcactcggagagttactccccctgggcgtctccctgcgtgtcccccagcaacggccagaaccccggagacctctgccccagattacagaacatccacactggctcccctcgcacctccccgggcacctctcctggcaccagcctagctgaggacggctgcctggggccccgctcgccctcccccagacctggctcccgctccacctccccacagggcaaacgcacctacgacatgtacaggaatccaggcctagtccccgggcaccgctcccgcagtccctcccctcacagcggccatgaggatcacaacataggtgcccactatacacacagcagcctcgctgatgccatgaatgggtttggctctggtcagccaggcctggtgcccactaaaatagtcaagacgaccaaccaggtttacactctgtacccagaaaaccacgtagaaggaaactacttggtgtcctgcgagcaggacataaaaaccaaacctgctgcagagcctttctttgttatccccccgatctggtccaagccgctggtctccagcatctgcagcatccccgtggcctctctccctcccctggaatggccgatccccacccgcacagaccagtacgagctccacatcgaggtgcagcccaaaccgcatcacagggctcactatgagacagaggggagccgaggtgcagtcaaagcgcccacaggaggacatcctgttgtgcagctacacggctacagaggcaaggagccgctcggcctgcagatcttcattggtacggccgacgagcgcatcctcaagccccacgccttttaccaagtccaccgcatcaccggcaagacggtcacgaccaccagctacgagaaggtcatccacggcaccaaagtgctcgagatccccctggagcccaagaacaacatgaaagcaataatcgactgcgccgggatcctgaagctcaggaacgccgacattgagctgaggaagggcgagacggacgtcggtcggaaaaacacccgcgttcgtcttgtgtttcgtgtgcacatacctcagcccggaggacagtacgtctctctccaagtggcctcgcatcccatcgagtgctcccagcgatcggcacacgagcttcccatggtggagaagcaggacatggacagctgctctgttctgggaggccagcagatgatcctgaccgggcagaacttcagctccgattccaaggtcattttcctggagaaaaaccaggatgggcagcaaatctgggaaatggaggcaacggtggacaaagataagagccaaccgagcatgctgttcgtggaggtgccgtcctacagagacacgtccgtctgccatcccgtcaaagtcaacttctacgtcatcaacggcaagaggaagcgcagccagccccagcacttcaccttcacaccgctggcagctccatccattaagaccgagcctatagacgagtacgaagcagaccacatgggtttcgccatgccccagatcttgggcttgtcccctcattcctactaccataaccaacgcggcgtcctccatccagacaacggcctggtctccggcatggcctcctgccagcgcctcagctccagccttccaaaccaagacgcgcgtttccagcagcagagcccggccatcatgtactcccgcgggggcaagagtctgagcggcagccccggcctttatcagcaggctggagggataatagccgacccgcaccggtctgtcctggtccacaccggctccccggcccagtctctaggtcccatcgtcgcgggccagcacccttccatcatccagttctcccccaccaaccacctgcttcgagcgggagacccccaagccctcaccgctccccagcagcctgatagccagcagatcatctactgcgacggctactctccccaggcagccgccgccgcccactcgcccacgcccccgcaggctcaggcagcggtgacccaccctcagcactatcccaccgtgatccagcagcagccgtacacgcagaaggggcagcagaaaggccgagctccgcctggcacggggcagatggaggctccgggagacggacagaggagggtgacggtcaaggaggagaacttggaccaggcctacctagatgatgtgaatgagatcataagaaaggatctgacgggtgtccaggccagagggcagacatagacgagggaccccagcaggaaatgacaacagctaacaccccccctcccatccaaccctgagacacacagacagacacacacacacacacacacaaacacgcagacttcaaccttccgaagaggtgacgcacatccgccaacaatcagaccttctcttcctcattttctttccctgccgtacagatacagaaatatcagctcccagctgctgtgtttgctttggatgctttcctgcaataaacacaacttgttcgagccttaacgtcagcacccagcaggtttccaacaaaacgatgagaaacaccaggggaatgtgccttattgtttcgactttcctttctagttgaagttcggattcaagtttgtcttgttaaaaagattataagaacagggatacatgtgttccctagtattgaatttgccgtgctgcctaggcaataaactcacacgagttgaatgatggttctgtagcatacgaccgttttcaagtgtgtgaaatttcga
>ENSSAUG00010002897|wnt3a
cggctacagaagaaatggtgtttgcaggcgtgcactgacaatgtcgacttcccctctccttgcaggtcgctagcagtgggccaccagtactcctcactgggaactcaaccgatcctctgcggaagcatcccgggtctggtgcccaagcagctgcgcttctgccggaactacgtggagatcatgcccagcgtggccgagggggtgaagattggcatccaggagtgccagcaccagtttagaggaagacgctggaactgcaccacggtcaacgacaatctggccattttcggaccagtgttggataaagccactcgagagtcagcatttgttcacgccatcgcctcggcgggagtggcgttcgcagtgacccgtgcctgcgcagagggtccagccaccatctgtgggtgtgacacacctcacaagggcccccccggtgagggatggaagtggggtggctgcagcgaggatgtggagtttgggagcatggtgtcccgggagtttgctgatgcgagggagaatcggcctgatgcgcgctcagccatgaaccgtcataacaatgaggcaggaagaatgtccctcaatgacaacatgttcctgaagtgtaagtgccacgggctctcaggcagctgcgaggtcaagacgtgctggtggtctcagcctgacttccgagtcattggtgactacatgaaggataagtacgacagcgcgtcggagatggtggtggagaaacacaaggagtcccgcggatgggtggagaccttaagacccaagtacaactacttcaaaccccccacagagcgtgacctggtttactacgagagctcacccaatttctgcgaccccaaccccgagaccggctccttcggcacccgcgatcgcatctgcaacctgacgtcccacggcatagacgggtgtgacctcctctgctgtggcaggggtcacaacaccaggactgagaagagaaaggaaaagtgccactgcattttccactggtgctgctacgtcagctgtcaggagtgtgtgagagtctacgatgtgcacacctgcaaatgaagacgcctggttctcgtctttgctcaccaaaactgaaagacttcagtaggcatgagaacaaatacagcaactttgagagactgtaaggctgcctgagctatcaaggactccagcggcagacgtaacagtcttgtgtttttgtgtcgtgatgctagaaagagcccgtctttgcctcgatcagctgaaaagtagatgttgacatcgtccatatgaactgcaacaatgatgctgatgatgacaacaatgttgatatctctagcgatgagttttcatgtactgacgtagaaaaggagaactgtcggctaattgacgaacaccatattggtgattttttttttgttgtctctgtgctccacgtagttccttttgttgagattagtccagtactgccaatgctttcaagtctgtgtggcaaacaatgaaagtgtcacattttcttcaatgtttaatcatccttcgttttttgccacaacaagatttatgagctatttacatgatcagacactcaacagcatgcattctcctcctcaacggtataagtatgtatctaaaaactaacattatcgtgtgaatgggttgtgtttttttattttttatagtgttaatatgttactgatgtttgggtaagaatgcacttgcacctgagtgaatgtaattgttatgctgcaatgtgtttacatgttctccaatccttaagctaacaagctaatatctgccacaactaactttatccagagagtagacatgagccacattcgctgaacaagaacacacgcggtccgcacactttccagaaacacccgagaacaccggaagcttttttcttcagagtaacaacgcttcggatgacatggagagttatgaccaaagacgagaacagaaaacctgctgtaagtccctggaggtcagacaacccaatcgccagaataaatgtcagctaagtgcatttatgca
>ENSSAUG00010002541|jag1b
agagagggatccggacaattcgagttgcaaatcttatcgatgcacaatgtgaacggagagctgttcagcggcatgtgttgtgatggctcgcggaccacggcggatagaaaatgcacgcgggacgagtgcgacacgttttttaaagtttgcctgaaggaataccagtcgagggtttctgctgcagggccctgcagcttcggaatgggatctacgcctgtcctcggagggaataccttttctttcaggagctcagtcaggaatgacaaatcccggatagttttgcccttcagttttgcctggccgaggtcctacactttgatagtggaagccttggacttcaacaatgaaaccagtggcgcagatgggaagctgattgagaaagcctctcattccggcatgatcaaccccagcccgcattggcagaagctgacacacaacggcccggtggctcagttcgagtatcagatccgggtcagctgcgacgagcactactacggcttcggctgcaacaagttctgtcggcccagagacgagttctttgggcattacacgtgtgactataacggaaacaagacctgtctggaaggctggtctggacctgactgcaacacagcgatatgtagacaaggctgcagcactgaacatggattttgtaaggagccagggggatgcaagtgtctgtatggctggcagggccagtactgtgacaagtgcatccctcaccctggctgtgtacatggcacctgtgtagagccatggcaatgcctgtgcgacaccaactggggcggccacctttgcgataaagatctgaactactgtggcactcaccagccatgcctgaatggagggacatgcatcaacacaggacctgacaagtaccaatgtacgtgtgctgagggctactctggtgccaactgtgagagagcggaacatgcctgtctgtccaatccatgctccaatggagggagctgttcagaaaccagccaaggttatgaatgtcagtgtgcgccaggctggagcggcccctcctgcaccatcaacattgacgactgctctccaaacccctgtaatcacggaggaacctgccaggatctggtgaacggctacaagtgtcactgtccttcacagtggacgggaaagacgtgtctgatagatgccaacgaatgcgatagcaagccttgtgacaatgccaactcatgccgcaacctgattggtggatacttctgcgagtgcatccctggttggatggggcagaactgcgacatcaatataaatgattgcaaggaccagtgccagaatgggggaacttgcaaggacttggttaatggctatcattgtgtgtgcccccctggcttcgctggcgagcattgcgagagggacatcgacgaatgcgcgagctcgccgtgtctgaacggcgggcgctgtcaggacgaagtgaacagcttccagtgcctgtgtctggctggcttttcaggaaatctgtgccagctggatatcgattactgctccccaaacccgtgtcagaacggagccccctgcttcaacctggccacggactactactgcgactgccccgaagactatgagggcaagaactgctctcacctcaaagaccactgtcgcaccaccacatgtaaagtgattgacagctgcactgtcgctgtggcgtctaacagcacaccaggtggggagcgctacatttcatcaaatgtgtgcggaccccatggtcagtgtcgcagccaggccgggggtcagttcagctgcgagtgtcaggagggcttcagaggcacctactgccatgagaacatcaatgactgtgagagtaatccatgcagcaatggaggcacctgcatcgacaaagtcagtgtgtaccagtgcatctgccgcgacggttgggagggcgaccattgcgagatcaacatcgatgactgcagcaccagcccctgtcataatggagggacatgtcgagacctggtgactgatttcttttgcgagtgcaaaaatggctggaagggaaagacgtgccactcccgtgaaagtcagtgcgatgaggccacatgcaacaatggtggcacctgccacgatgagggcaacacgttccaatgcaagtgttccccagggtgggagggtacaacatgtaacatagccaaaaactcaagttgtcttccaaacccgtgtgagaatggaggtacctgtgtggtgactggagagtcgttcacctgcgtctgcaaagaaggatgggaaggtcccacgtgcacccagaataccaacgactgcagtccccacccatgctacaacagcggaacctgtgtcgacggggataactggtaccgctgcgagtgtgcctcaggcttcgctggtccagactgtcggatcaatattaacgagtgccagtcctctccatgtgcctttggctctacctgtgtggacgagatcaacggatatcgctgcctgtgtccaccagacaggactggaccccactgccaagaagtgacaagaaagcattgctctgtgaatggacacgtcacccctgatggagtcaaatgggacgaagactgcaacacttgccactgttccaatgggaaagtggtgtgcacaaagatgtggtgtggtcctacatcgtgccacctgggtgccaaaggtcgaggcgggtgtccttcaggccaaaactgcatccccatcagagagggccactgctttgtgaagccctgcctcgttttcggcgagtgctggcgctccaaccctcccccgcctcccaccaaatgccaccccagctccagttaccaggacaacagctgcgccaacatcaccttcaccttcaacaaggagaccatgactcaaggctcgtctgtggaggatgtatgcaagcagctgaggcgcttgtacgtagtgaagaatttctccttggagcattctgtgtccataacctgtgacccctcattctcagccagcaacgagatccacgtctgcatctcaaccgaggaccatcgcctagaccggaaccctattaaagagatcacagacaggataattgacctgattagcaaacgcaacgggaacaacactatcatcagcgccatcgtagaggtgcgcgtcagactgccgccacagccaaatagaagcaactaccttgtgccactcctcagctccatcttcatcgtcatctgggtgctcgtgctcgtcagcattttgctgtggtgcatgcggcgacggcggaaacagagcaaccataacgggacgacggccgccggctccgaggacaacacgaccaacaacgtgcgggagcagctgaaccagatcaagaaccctatagagaagcacgtgggcctcactgtggccatcaaagactatgaaaacaagaactccatcattgccaaaataaggacaaatcatcccgagggggatgaggacgacaaggagaggcacttacagaagggccgctttgccaaacagccagcatacacactggtggagagggacgagaagacgcccatctccaatcccaactccacgtccaaaaatcctaattggactaataaacaggacaacagagacttggagacagcaaacagcataaacaggatggactacattgtatag
>ENSSAUG00010005040|mapk1
atggcgacagctgcggtgtctgcccctgctggctgcggccccagccccgggtcgggaacggagctggtccgcgggcaggccttcgacgtcgggcctcggtacaactgtgtttacctacctaacattttacatatacgtgtggccattaagaagatcagcccctttgagcaccagacatactgccaacgtaccctgagagagatcaaaatccttctgcgcttcaaacatgagaacatcatcggaataaacgacatcatccgcacaccaaccattgaccagatgaaagacgtatatattgtgcaggatctcatggagacagacctgtacaagctcctgaagactcaacacctgagcaacgaccatatctgctacttcctctaccagatcctacgagggctcaagtacatccactctgccaacgtcctgcatcgcgacctgaagccttccaacctcctgcttaacaccacctgtgatctcaagatctgtgattttggtttggctcgcgtggctgatcctgaccacgatcacactggcttcctaacggagtatgtagccactcgttggtaccgagcacctgagatcatgctcaactccaagggctataccaagtccatagacatctggtcagtgggttgcatcctggctgagatgttgtccaacagaccaatttttccagggaagcactacttggatcagcttaaccacatattggggatcctcggttctccctctcaggaggatctcaactgcatcatcaacgtcaaggccaggaactatcttttgtcacttcctttgcgctgcaaagtgccgtggaaccgccttttccccaacgctgatcccaaagctctggacctgttggacaagatgttgacctttaaccctcacaagaggatcgaggtggaggcggccctggcgcacccctacctggagcaatattacgacccaacagatgagcctgttgctgaggccccattcaagtttgacatggagctggatgacctacccaaagagacactgaaggagctcatctttgatgaaactgcacgtttccagcgtgcctttaggtcctaacatttcacatag
>ENSSAUG00010003494|igf2bp1
agagagaggaaaacattttcccgatctgatcccgccatagtttttcccactcttccaccacagacccatcaccaaatccatccagtacaacccacctcctccacagtgcgatagagaggctataggctgctgctttattcgtctgctggggccgggctgcaagtcaagggattcatttctcctcctgctccacttattctactggatttacggctaaattcaacgttaccatctggttttacacttctaaaatctctttttttttattttactttcctaacgagaatttacgtttcttccgttctgtgtttctttaaaaatatttttgagatattcttgccctctagcgagatttccactttcagttagtgtgacactatcttgttgcgctattagcagattcaggagataaactttttttcgctgggttaaattctagcatttccgggctttgttttttttttcttcgttttttggacttggaaaaacaatttccaccatgcacaagctatacattgggaatctaagcgacaacgtgactgctgaggacttagggaaaacctttgacgaccacaagatcccatactccggacagtttctaatgaaaaccggctatgcgtttgtggattgtccggacgatcagtgggccatgaaggctatcgagacgttttctggtaaagtggaacttcaggggaaacgtattgaagtcgagcactccgtccccaaaaagcaaaggaccaggaaattgcagatcagaaacattccacctcacttgcagtgggaggttaagtctctctttttcctatttctctcagtgaacacagagagtgagactgctgtggtaaatgtcacatatgcatcccgggagcatgccaggcaagccatccagaagctgaatggttaccagtttgagaacaatgccctgcgtgtctcctacatccctgatgagaactctgagctggagggaagcgggccccgcgacatccctctgagactgctggtacccacacagtacgtcggtgccatcattggcaaggagggagccaccattcgtaacatcaccaagcagacagcgagcaagattgacgtgcatcgcaaagagaacgcaggtgctgctgagaagccgatcagcatccactccacccctgagggctgctcggccgcttgccgcatgatcctggacatcatgcagcaggaagctaaagacaccaagactgctgatgaggttcctctaaagattctggctcataataactttgttggacgcctgattgggaaggagggacgcaacctgaaaaaagttgaacaggacacagacaccaagatcaccatctcacctcttcaggacctgacactgtacaatccagagagaaccatcacagtcaaaggcccgattgaagcctgctgcctagctgaggtggaggtcatgaagaaggtcagagaggcctatgagaacgacatcgctgctatgaatcaacagacccacctgatacctgggctcaacctgggtgctctgggcctcttcccctcctcctccaacatgccgccacccccgcctggaaactccacctctggtgctccctatggttgctttggggctccagaacaggagactgtccacgtatacatcccagcacaggcagtgggagccatcattggaaagaaagggcagcacatcaaacagctgagccgcttcgctggggcctccatcaagattgccccagctgaagctccagactctaaaatgaggatggtgattgtgacaggaccccctgaggcccagtttaaggctcagggcagaatttatggcaaactgaaggaggaaaacttctttggaccaaaggaggaggtcaaactggagactcacatcaagatggctgctgccgctgcagggagggtcattggcaaggggggcaagacggtgaatgagctccagaacctgacagcagctgaagtggtggtccccagggaacagacaccagatgaaaatgaccaggtcatcgtcaagatcaatggacatttctacgcaagccagttggctcagagaaagatccgggacatcctgacccaggtcaaacagccacagaaaggtgggatgggcatgggctctggctcaaacccccagggcttcacagagatgggcagccctacacaaggactgactcaggatcaacagccacgcaggaagtgagggtacccccaacctcctcacatgccgtgggccccccaacacctgacggacagacggatagacacatgcacggacggatagacagacgaatggacggacacaggagagcgacacacggacccagcgatagacagggagagatataaagagggagggagtacgcccgatagccagagagaaagatcagagtttagagagaaagagaggagatgaataaaatcacaacgaagaaatgaattaaaaaagag
>ENSSAUG00010003494|igf2bp1
agagagaggaaaacattttcccgatctgatcccgccatagtttttcccactcttccaccacagacccatcaccaaatccatccagtacaacccacctcctccacagtgcgatagagaggctataggctgctgctttattcgtctgctggggccgggctgcaagtcaagggattcatttctcctcctgctccacttattctactggatttacggctaaattcaacgttaccatctggttttacacttctaaaatctctttttttttattttactttcctaacgagaatttacgtttcttccgttctgtgtttctttaaaaatatttttgagatattcttgccctctagcgagatttccactttcagttagtgtgacactatcttgttgcgctattagcagattcaggagataaactttttttcgctgggttaaattctagcatttccgggctttgttttttttttcttcgttttttggacttggaaaaacaatttccaccatgcacaagctatacattgggaatctaagcgacaacgtgactgctgaggacttagggaaaacctttgacgaccacaagatcccatactccggacagtttctaatgaaaaccggctatgcgtttgtggattgtccggacgatcagtgggccatgaaggctatcgagacgttttctggtaaagtggaacttcaggggaaacgtattgaagtcgagcactccgtccccaaaaagcaaaggaccaggaaattgcagatcagaaacattccacctcacttgcagtgggaggttaagtctctctttttcctatttctctcagtgaacacagagagtgagactgctgtggtaaatgtcacatatgcatcccgggagcatgccaggcaagccatccagaagctgaatggttaccagtttgagaacaatgccctgcgtgtctcctacatccctgatgagaactctgagctggagggaagccagagggggtccgattatggccgtcgacctggctatggctcccgaggcgggccccgcggtggttccccgagctcagggatgcccgccaaagctcagcacgtagacatccctctgagactgctggtacccacacagtacgtcggtgccatcattggcaaggagggagccaccattcgtaacatcaccaagcagacagcgagcaagattgacgtgcatcgcaaagagaacgcaggtgctgctgagaagccgatcagcatccactccacccctgagggctgctcggccgcttgccgcatgatcctggacatcatgcagcaggaagctaaagacaccaagactgctgatgaggttcctctaaagattctggctcataataactttgttggacgcctgattgggaaggagggacgcaacctgaaaaaagttgaacaggacacagacaccaagatcaccatctcacctcttcaggacctgacactgtacaatccagagagaaccatcacagtcaaaggcccgattgaagcctgctgcctagctgaggtggaggtcatgaagaaggtcagagaggcctatgagaacgacatcgctgctatgaatcaacagacccacctgatacctgggctcaacctgggtgctctgggcctcttcccctcctcctccaacatgccgccacccccgcctggaaactccacctctggtgctccctatggttgctttggggtaagaacacctgctccagaacaggagactgtccacgtatacatcccagcacaggcagtgggagccatcattggaaagaaagggcagcacatcaaacagctgagccgcttcgctggggcctccatcaagattgccccagctgaagctccagactctaaaatgaggatggtgattgtgacaggaccccctgaggcccagtttaaggctcagggcagaatttatggcaaactgaaggaggaaaacttctttggaccaaaggaggaggtcaaactggagactcacatcaagatggctgctgccgctgcagggagggtcattggcaaggggggcaagacggtgaatgagctccagaacctgacagcagctgaagtggtggtccccagggaacagacaccagatgaaaatgaccaggtcatcgtcaagatcaatggacatttctacgcaagccagttggctcagagaaagatccgggacatcctgacccaggtcaaacagccacagaaaggtgggatgggcatgggctctggctcaaacccccagggcttcacagagatgggcagccctacacaaggactgactcaggatcaacagccacgcaggaagtgagggtacccccaacctcctcacatgccgtgggccccccaacacctgacggacagacggatagacacatgcacggacggatagacagacgaatggacggacacaggagagcgacacacggacccagcgatagacagggagagatataaagagggagggagtacgcccgatagccagagagaaagatcagagtttagagagaaagagaggagatgaataaaatcacaacgaagaaatgaattaaaaaagag
>ENSSAUG00010002541|jag1b
atgattctgagacggggctcatttgtttggttttgtttttttccgttgcactcatttcttctgtcctctcaacaggtgtcagagggatccggacaattcgagttgcaaatcttatcgatgcacaatgtgaacggagagctgttcagcggcatgtgttgtgatggctcgcggaccacggcggatagaaaatgcacgcgggacgagtgcgacacgttttttaaagtttgcctgaaggaataccagtcgagggtttctgctgcagggccctgcagcttcggaatgggatctacgcctgtcctcggagggaataccttttctttcaggagctcagtcaggaatgacaaatcccggatagttttgcccttcagttttgcctggccgaggtcctacactttgatagtggaagccttggacttcaacaatgaaaccagtggtgagtatgggaagctgattgagaaagcctctcattccggcatgatcaaccccagcccgcattggcagaagctgacacacaacggcccggtggctcagttcgagtatcagatccgggtcagctgcgacgagcactactacggcttcggctgcaacaagttctgtcggcccagagacgagttctttgggcattacacgtgtgactataacggaaacaagacctgtctggaaggctggtctggacctgactgcaacacagcgatatgtagacaaggctgcagcactgaacatggattttgtaaggagccagggggatgcaagtgtctgtatggctggcagggccagtactgtgacaagtgcatccctcaccctggctgtgtacatggcacctgtgtagagccatggcaatgcctgtgcgacaccaactggggcggccacctttgcgataaagatctgaactactgtggcactcaccagccatgcctgaatggagggacatgcatcaacacaggacctgacaagtaccaatgtacgtgtgctgagggctactctggtgccaactgtgagagagcggaacatgcctgtctgtccaatccatgctccaatggagggagctgttcagaaaccagccaaggttatgaatgtcagtgtgcgccaggctggagcggcccctcctgcaccatcaacattgacgactgctctccaaacccctgtaatcacggaggaacctgccaggatctggtgaacggctacaagtgtcactgtccttcacagtggacgggaaagacgtgtctgatagatgccaacgaatgcgatagcaagccttgtgacaatgccaactcatgccgcaacctgattggtggatacttctgcgagtgcatccctggttggatggggcagaactgcgacatcaatataaatgattgcaaggaccagtgccagaatgggggaacttgcaaggacttggttaatggctatcattgtgtgtgcccccctggcttcgctggcgagcattgcgagagggacatcgacgaatgcgcgagctcgccgtgtctgaacggcgggcgctgtcaggacgaagtgaacagcttccagtgcctgtgtctggctggcttttcaggaaatctgtgccagctggatatcgattactgctccccaaacccgtgtcagaacggagccccctgcttcaacctggccacggactactactgcgactgccccgaagactatgagggcaagaactgctctcacctcaaagaccactgtcgcaccaccacatgtaaagtgattgacagctgcactgtcgctgtggcgtctaacagcacaccaggtggggagcgctacatttcatcaaatgtgtgcggaccccatggtcagtgtcgcagccaggccgggggtcagttcagctgcgagtgtcaggagggcttcagaggcacctactgccatgagaacatcaatgactgtgagagtaatccatgcagcaatggaggcacctgcatcgacaaagtcagtgtgtaccagtgcatctgccgcgacggttgggagggcgaccattgcgagatcaacatcgatgactgcagcaccagcccctgtcataatggagggacatgtcgagacctggtgactgatttcttttgcgagtgcaaaaatggctggaagggaaagacgtgccactcccgtgaaagtcagtgcgatgaggccacatgcaacaatggtggcacctgccacgatgagggcaacacgttccaatgcaagtgttccccagggtgggagggtacaacatgtaacatagccaaaaactcaagttgtcttccaaacccgtgtgagaatggaggtacctgtgtggtgactggagagtcgttcacctgcgtctgcaaagaaggatgggaaggtcccacgtgcacccagaataccaacgactgcagtccccacccatgctacaacagcggaacctgtgtcgacggggataactggtaccgctgcgagtgtgcctcaggcttcgctggtccagactgtcggatcaatattaacgagtgccagtcctctccatgtgcctttggctctacctgtgtggacgagatcaacggatatcgctgcctgtgtccaccagacaggactggaccccactgccaagaagtgacaagaaagcattgctctgtgaatggacacgtcacccctgatggagtcaaatgggacgaagactgcaacacttgccactgttccaatgggaaagtggtgtgcacaaagatgtggtgtggtcctacatcgtgccacctgggtgccaaaggtcgaggcgggtgtccttcaggccaaaactgcatccccatcagagagggccactgctttgtgaagccctgcctcgttttcggcgagtgctggcgctccaaccctcccccgcctcccaccaaatgccaccccagctccagttaccaggacaacagctgcgccaacatcaccttcaccttcaacaaggagaccatgactcaagtgagttacctaggcagcagggagggagagattgaattaaagggttttagggggtcgttttcacttgtgctcaaccatcgctccttttttggtgttcttaactccatcttcatcgtcatctgggtgctcgtgctcgtcagcattttgctgtggtgcatgcggcgacggcggaaacagagcaaccataacgggacgacggccgccggctccgaggacaacacgaccaacaacgtgcgggagcagctgaaccagatcaagaaccctatagagaagcacgtgggcctcactgtggccatcaaagactatgaaaacaagaactccatcattgccaaaataaggacaaatcatcccgagggggatgaggacgacaaggagaggcacttacagaagggccgctttgccaaacagccagcatacacactggtggagagggacgagaagacgcccatctccaatcccaactccacgtccaaaaatcctaattggactaataaacaggacaacagagacttggagacagcaaacagcataaacaggatggactacattgtatag
>ENSSAUG00010003494|igf2bp1
agagagaggaaaacattttcccgatctgatcccgccatagtttttcccactcttccaccacagacccatcaccaaatccatccagtacaacccacctcctccacagtgcgatagagaggctataggctgctgctttattcgtctgctggggccgggctgcaagtcaagggattcatttctcctcctgctccacttattctactggatttacggctaaattcaacgttaccatctggttttacacttctaaaatctctttttttttattttactttcctaacgagaatttacgtttcttccgttctgtgtttctttaaaaatatttttgagatattcttgccctctagcgagatttccactttcagttagtgtgacactatcttgttgcgctattagcagattcaggagataaactttttttcgctgggttaaattctagcatttccgggctttgttttttttttcttcgttttttggacttggaaaaacaatttccaccatgcacaagctatacattgggaatctaagcgacaacgtgactgctgaggacttagggaaaacctttgacgaccacaagatcccatactccggacagtttctaatgaaaaccggctatgcgtttgtggattgtccggacgatcagtgggccatgaaggctatcgagacgttttctggtaaagtggaacttcaggggaaacgtattgaagtcgagcactccgtccccaaaaagcaaaggaccaggaaattgcagatcagaaacattccacctcacttgcagtgggaggtgctggatggtctgttggcccagtgtgggaccgtcgagaactgtgaacaagtgaacacagagagtgagactgctgtggtaaatgtcacatatgcatcccgggagcatgccaggcaagccatccagaagctgaatggttaccagtttgagaacaatgccctgcgtgtctcctacatccctgatgagaactctgagctggagggaagccagagggggtccgattatggccgtcgacctggctatggctcccgaggcgggccccgcggtggttccccgagctcagggatgcccgccaaagctcagcacgtagacatccctctgagactgctggtacccacacagtacgtcggtgccatcattggcaaggagggagccaccattcgtaacatcaccaagcagacagcgagcaagattgacgtgcatcgcaaagagaacgcaggtgctgctgagaagccgatcagcatccactccacccctgagggctgctcggccgcttgccgcatgatcctggacatcatgcagcaggaagctaaagacaccaagactgctgatgaggttcctctaaagattctggctcataataactttgttggacgcctgattgggaaggagggacgcaacctgaaaaaagttgaacaggacacagacaccaagatcaccatctcacctcttcaggacctgacactgtacaatccagagagaaccatcacagtcaaaggcccgattgaagcctgctgcctagctgaggtggaggtcatgaagaaggtcagagaggcctatgagaacgacatcgctgctatgaatcaacagacccacctgatacctgggctcaacctgggtgctctgggcctcttcccctcctcctccaacatgccgccacccccgcctggaaactccacctctggtgctccctatggttgctttggggctccagaacaggagactgtccacgtatacatcccagcacaggcagtgggagccatcattggaaagaaagggcagcacatcaaacagctgagccgcttcgctggggcctccatcaagatggtattaaaattgattatcaaagtctttgtctgccccctgcaggctcagggcagaatttatggcaaactgaaggaggaaaacttctttggaccaaaggaggaggtcaaactggagactcacatcaagatggctgctgccgctgcagggagggtcattggcaaggggggcaagacggtgaatgagctccagaacctgacagcagctgaagtggtggtccccagggaacagacaccagatgaaaatgaccaggtcatcgtcaagatcaatggacatttctacgcaagccagttggctcagagaaagatccgggacatcctgacccaggtcaaacagccacagaaaggtgggatgggcatgggctctggctcaaacccccagggcttcacagagatgggcagccctacacaaggactgactcaggatcaacagccacgcaggaagtgagggtacccccaacctcctcacatgccgtgggccccccaacacctgacggacagacggatagacacatgcacggacggatagacagacgaatggacggacacaggagagcgacacacggacccagcgatagacagggagagatataaagagggagggagtacgcccgatagccagagagaaagatcagagtttagagagaaagagaggagatgaataaaatcacaacgaagaaatgaattaaaaaagag
>ENSSAUG00010007812|lrp1ab
atgagcgttgccgtggcgctgctagcctgtgctcccaaagctgatgaccaccccaagacttgcagctctaagcagtttgtatgtaaggaccaggtgacctgtatctccaaaggctggcgctgcgacggggagaaggactgcccagatggctcggacgaatcgccagatatctgtaaggtgaaccagtgtcctgtcaatgaagctgggtgcctggatccggatgtgtgtatccacatgagcaaaatgtgcgatggagtacccgactgcaccgatggctgggatgaagggcctcactgcagagcaccaggctgtgcctcccatgggtgcgagtttcactgtgctgtgacgcatgacggacctcagtgctactgtagcaacggctatgaggtcgctgcagatggaaagatatgtaaagatttcaacgagtgcaatgtgtacgggacatgcagccagacgtgcacaaacacagagggctcctacacctgcagctgtgtggagggctacctgctgcagccagacaatcgctcctgcaaagccaaaaatgagccggtggaccgtctgcctatgttgttgatcgctaacctccatgacatccgctgcacctccctgagcggctccacatcccggctgccctccatcgccactaagcagaccatggctatggacttcatctacgccgaggaaactgtctgctggatagatgtgggagaaacccctgccgcaacacacctgaagtgcgccagcatcccagacctcaagactgtcactaacatccgcaccattaacatctccctcagcctgcaccatgtggagcagatggctatcgactggctgaccggaaacttctactttgtggatgacgtggacgaccgggtgtttgtctgcaacaagaacggccagacatgcgtgaccctgctggaccaggagctgtacaaccctaaaggcatcgctttggacccagccatgggcaaagtgttcttcacagactatgggtcaacaccaagggtggagcgctgtgacatggatggtcagaaccgcactaagctggtggacagcaagattgtcttcccccatggtatcacactggacctggtcaaccgcatggtgtactgggctgacgcctacctggactacattgaggtggttgactatgagggcaagaaccgacacaccatcatccagggcctgctgattgagcacctgtacgggctgactgtattcgagaactatttgtatgccaccaactcagacgaaggcaacctcaaccccaagaccagcgtgatccgagtgaaccgcttcaacagctctgacttccatgtggtgacgcgggtggatcggggagcagcgctgcacgtgtaccaccagaggcgccaacctcaagtacgcagccatgcttgtgccctggatcagtttgggaaggccgggggttgctctgatatctgtctgctgagcaacagccacaagacccgaacttgccgctgtcgctctggattcagcctcggcagcgacggcaagtcctgcaagaaaccagaccatgagttgttcttagtgtacggtaagggtcgccccggtatcatcaggggcatggacatgaacgccaaggtgcctgatgagtacatgattcccattgagaacttaatgaacccccgagctctggatttccatgctgcaagtgagttcatctactttgctgatgccaccagctacatcattggccgacagaagatagatggcacagagagagacaccatactgaaggaaggtattcacacagtggaggggatagccgtagactggatgggaggtaatctctactggacagatgatgggcctaagaagactatcagtgtggccaggctggagaaagcttctcagacccgcaagactctcattgagggcaagatgagccacccgcgtgcaattgtggtggacccgcagcatgggtggatgtactggactgactgggaggaggaccccacagagagcaacagagggaagatcaagaaagcttggatggatggttcccatcatcaagtgttcctgaccagtaagacggtcctttggccgaatggtttgagtctggacattccccaaggtatcctgtactgggtggatgcttactacgaccgtattgagttggtttacctcaacaccacagagcgaaaggtggtgtatgaggggcaggagcttaaccacgcctttggattatgccattacaagcaatttctcttttggaatgaataccggggcggcagcatctacaaactggaccatgtcaccaagacggtcacgctcctccgcaacgagaggccgcctatctttgagatcagagtgtatgatgcacaccagcagcaaggctccaatgtgtgtcgagttaacaatggcggctgcagcagtctgtgcctcgctattccggacggcaggtcctgtggctgcgctgacgatcaaatcctggatgtcgataatgtcacctgcaaagccaacccctcctacgtgcccccgccccagtgccagcccggggagtatgcctgcaagaacaaccgctgcatccaagagcgctggaagtgtgacggagacaacgattgtctggacaacagcgacgagggccctgagctctgccaccaacacacctgcccagctgaccgattcaaatgccagaacaaccgttgcatccccctgcgatggctgtgtgacggcgacaatgattgtggcaacgatgaagatgaatccaacaccacctgctctgctcgcacctgcccaccaaaccagtacccttgtgccagtgggcgctgcatccccatctcctggacatgtgacctggatgacgactgtggagatcgctcagatgaaccagactcctgtgcctaccccacctgcttccctctgacccagttcacctgtgccaatggccgctgcatcaacatcaactggcgctgtgataacgataatgactgtggggacaacagtgatgaagccggctgcagccattcctgctccagcgtccagtttaaatgtaacagtggccgctgcatcccagaatactggacctgtgacggcgacaatgactgtggagactacagcgatgagactcacgccaactgtaccaaccaggctacccgtccaccaggcggctgccatgtagatgagttccagtgtcggatggacggcctgtgcattccgatgcgctggcgatgcgacggtgacacagactgtatggacctgagtgatgagagcaactgcgagggtgtgacccacatgtgtgacccagcagtcaaattcagctgcagggactctgctcgctgcatcagcaaggcctgggtttgtgatggcgacagtgactgtgaggacaattcggatgaggacaactgcgaggcgttggtgtgcaagttgtctcaccacatgtgcgccaccaacgactccatctgtctgcctactgagaagctgtgtgatggcaccgatgattgtccggatggctctgatgagaaactttgcgacttgtgtgcattagacaacggtggctgtagccacaactgcagcatcatacctggggagggcttcatgtgctcttgtcccctcggcatggagctgggagctgacaacaagacttgccagatccagagcttctgtgccaaacatctcaagtgtagccagaagtgcgaacaggagaaatccagcgtcaagtgctcttgctatgagggctgggagctggagtctgacatggagagttgcaaaagcactgatcccttcaagccgttcatcatcttctccaaccggcatgagatcaggaggattgagcttcacaagggggagttcagtgtgctggtgccaggcctgaggaacaccatcgccctggacttccacctcaacgagagcacgctgtactggaccgatgtcgtggaggacaagatctaccgtgggaaactgtctgataatggagccctgaccagtttcgaggtggtgatccagtatggactggctaccccagagggcctggctgtggactggatagcaggaaacatctactgggtggagagcaatctggaccagatcgaagtggccaaactggatgggaccatgagaaccaccctactggctggtgaggtggagcaccccagagccatcgccctagaccctcgagatgggattctgttttggacagactgggatgccagtctgcctcggattgaggcagcatctatgagcggtgaaggcagacgcaccatccacagagagacgggcagcggtggctggcccaatgggctcactgtggactacatggaaaggcgcattgtctggattgatgccaggtcggatgcaatctactccgctatgtacgacggctccgggctgattgaagtgttgcggggtcatgagtatctgtcccaccctttcgctgtcaccatgtatggaggcgaggtctactggactgactggaggactaacacgctggctaaagccaacaaatggactggacacaacgtcaccgtagtccagcgcaccaacacacaaccctttgacttgcaggtctatcacccgtccagacaaccccaggctccaaacccgtgtgccaccagcgatggtaagagcccttgctctcacctctgtcttatcaacttcaaccagaccttctcctgcgcctgccctcacctcatgaagctgcagcctgacaaacgcacttgcaaagagtcccgcaagttccttctatacgcccgtcagattgagatccgtggtgtagacattgacaacccctactacaactacatcatctcctttaccgtgccggacatagacaacgtgacagtagtggactatgacgccgtggagcatcgcatctactggtcagacgtccgaacacagacaatcaagagagctttcattaacggcacaggggtggagacagttgtgtctgctgaccttcctaacgctcatgggctggcagtagactgggtgtccaggaacctcttctggaccagctatgataccaataagaagcagatcaatgtggccagactagacggatccttcaagaacgctgtcatccaaggcttagacaagccccactgtctggtgctgcatcctctactggggaagctgtactggactgacggtgacaacataagtatggctaacatggacggtagcaaccacaccacacttttcaccaatcaaaaaggaccagtaggcctctctattgactatgaaaatgagcagctgtactggataagctcaggaaacggcaccattaaccgctgtcagctggatggaacgaagccggagatcctggaaggtgttaaaggcaaacttaccaaggctacagcactggctataatgggagacaaactgtggtgggccgaccagggaactgaccagataggaacatgtgacaagaaggacggaggaaactggaaggttttgcgaaacaacacgtctcctatgatgcacatgaggatctatgatgaggacgtgcagaaagcgggtatcaacctttgcagtaacaacaatggagactgctcccagctgtgtctgcccacctctcatacaaccagggcctgcatgtgcactgctggatacagcctgaagacaggacagcagtcctgcgagggtatgggctccttcctgctgtactctgttcatgagggaatcagaggaattccactcgacccggcagacaaatctgacgccttggtgccagtgtctggcacctctctggccgtcggcatcgacttccacgctgagaatgacaccatctactgggtagacatgggtctgagcaccatcagcagggctaagagagaccagacatggagagaagatgtggttaccaatggcattggcagggtggagggcatcacagtcgactggatagcaggaaatatttactggactgatcagggctttgacgtgatcgaggtggccaggctgaatggctccttccgctatgttgtcatttcccagggcctggacaagcccagagccatcactgtccacccagttaaaggctatctgttctggactgagtggggtcagtaccctcgtattgagcgctctaggttggatggtacccagaggttggtcctcgtcaatgtgagcatcagttggcccaatggaatctccatcgactacgaggagggtctgctgtattggtgcgatgccaggacagacaagattgagcgcatcaacctggagactggagagaacagggagctggtgctggccaacaacaacatggacatgtttgctgtgtccgtttttgaggaatacatctactggagtgacaggactcatgccaacggctccattaagagaggcagcaaagacaacgctacagatgcactgcagctcaggactggcatcggtgtgcagctgaaagacatcaaggtgttcaacagggccaggcagcaaggcaccaacgtgtgcaaagacaacaacggtggctgtgaacagctgtgtcttttccgtggcaacactgatcgcacctgcgcctgtgctcacggcatgctggcagaggacaaccgcagctgtcgcgactacgatggatacctgctgtactcggagcgtaccatactgaagagcatccatctgtcagatgagactaacctcaacgcgccaataaagccgtttgaggacccggaccacatgaagaatgtcatcgccctcagctttgactatcacggtggtggaggcaagggagccaaccgcatcttcttcagtgacatccactttggcaacatccagcagatcaacgatgatggcacagaccgcaagattgtggtggacaatgtagggtcagttgagggcctggcatatcaccgcggttgggatacgctctactggaccagttacacaacctccaccatcactcgccacactgtggaccagagccgctctgtggcctataaccgcaacactgtggtcactatgtctggagaagaccaccccagagcctttgtgctggacgagtgtcaggacctcatgttctggaccaactggaacgagcaggctcccagcatcatgagggcctcgctgaatggagccaatgtgctcgtcatcatcggcttggacattaaaactcccaacggcttggcaatagatcaccgtgccgagaaactgtacttctctgacgccacactggacaagatcgaacgctgcgaatatgacgggagcagccgttatgtcttgttgaagaatgagccggtccatccgttcggcctggccgtgtatggagactacatcttctggactgactgggtgaggagggctgtcctgagagcggacaagtacaccggaggtgacatgaaagtgctgcgcgctgacatccctcagcagcccatgggcatcgtggctgtggctaatgacaccaacagctgtgagttttctccttgccggacaaataacggaggttgccaagacctgtgtctgcccacatctgatggacgggtcaactgcagttgccgtggagacagacaacttctggaagacagcacctgctcttcgctgaatatgtcgtgtggaagcgttgatgactttgagtgtgggaacggagactgtatcaactacagcctgacctgcgacggcatggcccactgcaaggacaagtctgatgagaagcagtcctattgtgcaaatcgaatttgtaagaaaggctacagacgctgtatgaatggccgctgcatcggccaccagttctggtgtgatggcacggatgactgtggtgaccactcagatgagctgccctgcaacatgaccctgtgcaaaccaggagagttccagtgtaaagatggcagctgtatctccaactacagccgctgtgaccaggtggtcaactgtgaggatgctggtgatgagatgaactgtcaacccaccgattgctctcgtttcttccgcctgggagtgaaaggagcttccttccagagctgtgagaaaacaactctgtgttatctgtcctcgtgggtttgtgacggcaacaacgactgtggagacttttcagatgagagaaactgcccagataaaaggaagctcaaatgtccagtcaacttctttgcttgtccgagtggtcgctgcattcctatgagctggacctgcgataaagagaacgactgtgagaacggagctgatgaaactcactgtgacaaattttgcacatccacccagtttgaatgtgggaaccaccgctgcatttcctcccactgggtgtgtgacggctccgatgactgtggtgatggttctgatgaggaccagaaatgcaaatccaagacctgcagtcctgaggctttccagtgtcccggctcccacatgtgtgtgcctcaacgctggaagtgtgatggagacaaggactgtcctgatggagctgatgagagtgtcaaggctggctgcatgtacaccaacagcacttgtgatgtggagaatgagttcatgtgccagaacagacagtgtatccccaagcactttgtgtgcgaccatgacatcgactgctccgacggttcagatgaatcccgagaatgtgaatacccgacatgtggtccagatgagttccgctgtgccaacggacgttgcctcaaccagaagaagtgggagtgtgacggagagtttgactgtcaggatcgctctgacgaggctcccaagaaccctcgttgcactgactcagagaggcggtgtaatgaatcagccttcatgtgccgtaacggcaagtgtttgaacgagaccctgttgtgtgaccgcaacgatgactgtggcgacggctccgatgagctcaactgcttcatcaacgagtgtctcaacagtaagatgagtggctgctcgcagctctgcgatgacctcaagattggcttcaagtgcaggtgtcatcctggtttccagctgaagcgtgatgggaagacatgtgtggatatagacgagtgcacaactacctacccctgctctcagcgctgcatcaacacacacggcagcttccattgtctgtgcgtggatggctttgaactaagccccaacgaccccaccatctgcaagtccacatcggaggagccctacctgatcttcgctaaccggtactacctgagaaaactcaacctggatggatccaactacactctgataaaacagggcctgaataatgcggtggcattggacttccactatgcagagcagatgatctactggacagatgtgaccactcagggcagcatgatccgacgcatgcatatgaacggcagcaacatggaggttttgcaccggacatccctgagcaacccagatggcctggcagtggattgggttggcgggaacttgtactggtgtgacaaaggccgggacaccattgaggtgtcaaaactcaatggcgcctaccggactgtgttggtaaacagcggcctgagggaacctcgtgctgtggccctggatgtccgctatgggtacctgtactggtccgactggggcgacaaccctcacattgggagaatcgggatggacggcaccaacagaagcgtcatcgtagaggataagatcacgtggcccaatggattaaccctggacttcatcaatgaccgtatatactgggctgatgccagggaggactacattgagtttgccagcctggatggcaccaacagacacacagttctcagccaggacatcccccacatctttgccatgactctgtttgaggagtacatctactggaccgactgggagacaaagtccatcaacagagctcataaaagtcttggcaccaataagtccaccctgatcagcaccctgcatcggcccatggacatccacatttaccatccctaccgccagcccgaggtgctcaaccacccgtgccagacgaacaatggcggctgcagcaacctgtgcctcctctctcctggaggaggttacaagtgtgcctgtcccaccaacttctacctggccagtgaccaacgcacctgcatgtccaactgtacagccagccagtttgtgtgcaagaacgacaagtgcattcctttctggtggaaatgtgacacggaggatgattgcggcgaccggtctgacgagccggcggactgccctgagttcaaatgcaggccggggcagtttcagtgtggcacaggcatctgcaccaaccccgcctacatctgcgatggagacaacgactgccaggacaactcagatgaggccaactgtgatattcacgtatgcctgcccagccagttcaaatgttcccatccaagccgctgcatcccaggcatcttccgctgtaatggccaggacaactgcggagaaggagaggatgagaaagactgccctgaggtcacgtgtgcgcccacccagttccagtgtgccatcaccaaacgctgcatacctcgtgtctgggtgtgtgaccgcgacaatgactgtgtggacggatcagatgaacctgccaactgcacccagatgacttgtggcgtggatgagttccgctgtaaagactctggacgctgcatcccagctcgctggaagtgtgacggcgaggacgactgcggcgatgcgtcagatgaaccaaaagaggagtgtgctgagaggacatgtgagccgtaccagttcaggtgtaagaacaaccgctgtgtgccgggccgctggcagtgcgactacgacaacgactgtggggacaactcagatgaagacaagtgcagtaggtgtccctttcagctcagagacgtcatcttctgtggttgtatcccttttgcctgcacgaacggccgctgtattgctgggaggtggaagtgcgatggggaccatgacttattgcttttcaaagaaactgggcgtcactgccctgcagatgagttccagtgtaacaacactttgtgtaaacccctcgcctggaagtgtgacggggaggacgactgtggggacaactccgatgagaatccagaaatgtgcaggaagttccagtgtcctccaaccagagctttgcgctgccaaaacgaccgtgtgtgtctgcaagtgtcaaagaggtgcgacggtgtcaacaactgtggcgacaactcggatgaattgaactgccagacccctgcagctgttcccacatgtgagaaggacgagttcctgtgtgccaacaacagatgcatcagctccactctgcgctgtaacttctttaacgactgtgaggactacggctctgacgagatcaactgcaagacagacaccaaactaaatgactgcaggagcaacaggactcagtgtggtgatggagacgaggcccactgtttaaccaatggcacggactctttctgctcctgcaaaccaggcttccagaagaccggacaccgcacctgtggagatcagaatgagtgcctgcagttcggagtgtgttcccacatctgcaacaacaccaaaggctcctacaaatgcagctgccacaagtacttcacaaggatcaacgagacctgcaaggctgacagtgaggaccagagctgcattctctacatagctgatgacaatgaaatccgcagcctggaccctggcatgcctaactggcgctatgagcagaccttccagggcgacgccagtgtgcgtatcgatgcgatggacctgcacatcaagaccaaccgcatcttctggaccaactggcacacgggccgcatctcctcctacgagcttccaggaccgacaacgtcatcaacctcctccaactctcatcgcaacaaacggcagagtgagggcaggatcacaaacctgcagatcaaagagctgaagatgcctcgtggtattgctgtggactgggtggccggtaacctgtactggaccgactctggtcgagatgtcattgaagtggctcagatgtcgggccagcattgcaagacgctcatttccggcatgatagatgagccgtatgccatcgtagtggatccacagagaggtaccatgtattgggcagactgggggaaccatcctaaaattgagacagctgccatggacggtactctgagacaaacgcttgttcatgagaacatccagtggcccacaggtttggctgtggactacttcaacgagcgtctttactgggcggatgccaaactctcagtgattggcagcgttcgtctggatggttcggatcctgtcacttctgtgtccgacctgctccatccattcagcatagatatcttcgaggactacatatatggcgtcacttatataaataatattgtcttccgagtcaacaagtttggcaaaggccccatggagaacctcaccacaggcatcaaccatgctactgacatagtcctctaccaccgttacaagcagccagagatgactaacccatgtgacaggaagaagtgtgagtggctgtgtctgctcagccccagtggaccggtgtgtacctgccctaacaactacatggctgacaacggcacgtgcgtggagagaccggcccccacccagtcaccattctctcccccctcagggccgtgtgaaattcagtgtcagaatggcggaagctgcttcctcaacgcccgtcaggtggccaagtgtcgctgccagcccagctacactggagagagatgtgagatcaaccagtgcagggactactgcaagaacggaggcacgtgcactgcttcacatacaggtgctccaacctgcagatgtccaaagggcttcacagggcccaactgtgggcgccacacttgtcaggactactgcctgaacggaggcaactgcacggtcaacatgggcaaccagcccacctgtagctgcccagatgagtacaagggagaccagtgccagtacagtaaatgtgaaggcttctgtcaaaacggtggaacctgcttacaaacctctaatggcaccaaactctgtcagtgccccactcagtacatcggacaccagtgtgagctcgacaaatgtcagttctgcggaacgggcaagtgtttgacgtcaccgtcaggagaggtttcctgcagctgtcccaacggtcagacccagcccagctgcttcacctgtcgggactactgctcaaacggacaatgctcagttgacactcgcacactgctgcctcagtgcaattgtaaatctctgtctgtctgcagtgcgaagggtttccagcaccaccggatgacaaacggagccatgaatgttgagatcgggaatcctgcatataagatctatgaaggagaccctgacgatgacgctggggagctcctggattcagactttgctttggacccagacaagcccaccaacttcaccaacccagtgtatgccaccctgtacatgggcgcccacaacagccgcaactctctcgccagcacggatgaaaagaaggagcttctctcccagggcgacgaggacatgagcgacccgctggcgtag
>ENSSAUG00010007083|lrp2b
agtggacaatgcatcaacatactttggagatgtgatgggacaaaagactgccaggatgactcagatgagctgaactgtccggctccatcatgcacctcggaggaatttaagtgtgtgacaagcggtgaatgcatctcttcgggatttgtctgtgatggggatgaagactgtgaagatggctcagatgaacaaagagcttgtggtgacaggacctgcagctcagaccagttcagctgccaggagggtcagtgtatccctggcacatacagatgtgaccatgtaaaggactgcgtggatgactctgatgagaagaactgcgactatccacagtgcagtgagaagacgtgtgcaaatggggcctgttacaagaattctcagcactgcaatgggctgcaggactgcagagatggctctgatgaattcaactgtacaacgcagcactgtcccatacaccagtttgaatgtgcaaatggctactgtttgccactttcctttgtgtgtgaccactgggatgactgtggggatggcagtgatgagcaaggctgtgtgtacgagagctgtagcggcaatcagttcacgtgttccagtggccgttgtattcctcagcgctgggtgtgtgaccagttcaacgactgtggagatttcagtgatgagagaggatgtgatagtaactcccgagactgttaccctggtgagtggggctgccctggctcgacagcatgtatagcaataggcaaagtgtgtgatggcaaacccgactgtcctggagcaacagatgagaccaactccacagcacaggaaacatgcagcctggatcggtgttcagccttgagctgcgagtaccactgtcatgagtctcctcagggaggtacttgctactgccctgatggttatgctgtagctaatgacagtcgttcctgtgtagactatgatgactgtcagatctggggcatctgtgaccagctgtgtgaagatcgtcctggcacacaccactgtagctgtgctaatggatacttcttggagcagggtcatgtctgcaaggccaatgtgtcagatggactgccacagctaattttcacaaacgggggtgatgtgatgatggctgatatacacggacgctttgtcagaactctggtgccggctcagggcaaaggttatgccataggagttgcaacccactggaacagcggaaaagtcttctggagtgatatagacaccaacaaggtatattctgccaacttcaacgggggtgacatcaaggaggttctgacgactgcagtcctccatgtccagaatctcgctgtggactggatcaacttcaaactctatgtcttagagaccaggatggagcgtatcgacatgtgcaacttcgatggaggtgatcgggtcacgctggtggctgaaaacctgcagaatcctcatggcctcgccctggaccctacagtcggctacatgttcttcacggacatgggagaaagagatgagcagatgaagcttgaacgtgcctttatggacggcagtaaccgatttgagctagtgaagaccagactcggcattccaacaggaatcaccctagatattgtcacccagagggtctactggtctgacagccactttgacacagtggagactgtcacctacagcggtttggacaggaaaatagtcctcaatggtgcaacccaggctccgcatccttttggaattgctgtgtttgaaaaccatgtattcttcaccgactgggccaagatgggtgtgataagaaccaaccgctttgatggcagcaacccatcgcttatctatcgtactgcaaatcgaccgggccatgttgtggtctcacaccctgtcttgcaacctgttgtgatgaacccttgcggcagacacaatggcggctgtcagcagatctgtgtattgagtcaccgcactgacaacgatggtctgggcttccgctgcaagtgtcaccatggttacgacctacaacccgaccgccattcctgcttcaaggtgaaggacttcctgatgatcgccacctctctgggggtgcggggaattccactgaacttgtccctccaggaggacatcactttgcccctctcagggtttggggcgtcgttctctggctctgctgtggagtttgacggcagcgaaggctccattttctacaatgacaggtccagaggcctcgtctataagtcaaacctcaatggcacagtccaacagattctgaccggctacagagtcggatcgattgacgccatggcttatgactggacctccaaagtcttgttttggaccacgagcacctacagatccgtggtggcctacagaattacagacaaatccaggctagatattgtgacaggattgaggtacccaaaaggaatcgctgtgcatcctggtgttggcttcttgttttggtccgactggtaccgtccagcggtcataatgagagcgttcacagatggcaaaacaaggatttcaaggattaaaacaataatgaacaggctgtactgggtggatgccgaattgaagcaggttggtcacattagcgtgtatggaactgacagacagacgtttaccaatcttggccagatcactcaacccttctctctgacaatttatacagactacctgtatgtgtctgacacaaggaccagaggaatatttgagatgaggaagagggatggtggaggaaacataatgatcagacaaggaatcacaggcatcatgaatatcaaagcctacacagctgaccttcacatttgtaaataccagtgcaatatattgcccaacgggcgctgcagccacttctgtttcccaactccctcctacggtcgagtatgcggctgtccgtacggtatgaaactccaggtcaatcagagggactgcatcaaggatgattctgttcccccacctgacaccagctgtggcgaccaagcctttgcatgtgatgaaggccactgcacacccctctctcagcgctgtgatggaattgctgattgctttgataagactgacgaggctaactgcaccgatacaggagcgacctgttctccatgggctttcacctgcaacaacaagcactgcatccggtccagttggcgctgtgatggcatggatgactgcggcgacggctctgacgaagcaaactgtcccactggaatccctaaaacctgtgcctccaactactttacctgctacaacaacaggtgtatctctaaatcatggctgtgtgacggtatgaatgactgcggcgatggctctgatgaacacaactgcaactcaacaatcactacatgccctcctaactacttcctgtgtcctgaccaccggtgtctccacttctcctatgtgtgtgatggagaccaggactgcctggatggttctgatgagaaaaactgtgagtttacctgtgcatcctatgagtttgcctgtgccagtggggaccagtgtgtcagttccatgtatgagtgtgatggagtgttcgactgcagggaccactctgatgaacgggactgtcccactcgagggccaggcctctgccacgatgacgagttccagtgccagaccgacggattctgcataccagacaattgggagtgcgacggccatccagactgtgaggatggatcagacgaacacaactcctgcgggcctgtcacctgcacatccagctatttccagtgtgccaacaagctgtgcatcccgacatactgggtgtgcgatggcgacaacgactgcagggacatgagtgatgagcagaactgccccacccctccatttcgctgtccatccgaccagtggcagtgccccggagacctgctgtgcattgacctggacaaggtgtgcaacggccagagggactgccctaatggagcagatgagtcacctatctgcaaccaagatgactgtgcactgaacaacgggggctgcagtgacggctgcattcaaggaccatacggggctcagtgcacctgtcacccaggatatcagctccttaatgactccaagacctgcgaagacatcaacgagtgtctgatcccgggtttctgcagccagcagtgcttcaacgagaggggaaccttcaggtgctcctgctcacatggttacctcctcgagcctgatggacgcacctgcaaagcaataaacaacgtagcagctgtacttctggttgcaagacgtagccagatcatcacccagcggatcaacgtgagaccaccactgatacatccactggtcagcggttcaagcatcgtgactgtagactttgatcacgtcacttccagaatctactgggctgatgcctcgcagaagaagataatgagttcctacgacaatggcaccgacatacgggaaatgttctcctctggtctgatggagccagagactatagctgtggactgggtggctcggaacctttactggaccgactctgtcatggagaacattgaggtttctactctggacggtcgctttcggaaagtcctcctcaccaagaatgtcacccgtccccgcggactagttttagacccccgtaactacaccaacctgatgttctggtcggactggggtcagaaccccaggatcgagcgagccaacatggatggatcctttagacaagtcattgtcagggataaggtctactggcccaacggcctgaccctggactacaccacacgcagggtctactttgctgatgcctacctcaaatacattgactactgtgactatgatggcaaaaaccgctatcaggtcatggcaagtgacatggttctccagcacccacatagtatgaccatctttgaggacagcatctactggtcagagcgctacaccagcaaagtgatgaggaccaacaagttccacggtggcaatgtcaccattatgttgaacgatgtgtaccagcccatgggcgtcgttatggaccatcccatcaaacagcctgcaggcctcaacccatgcaaagaccacccgtgctctcagctgtgcctgctgtcaggcctgagacccagatactacagatgcgactgtcagtctggctggaagcttgatactgacaaacgcacttgtgtcaaagatgagactcccttcttgatggtggtgagagattctgtgatctttggcattcctctggaccccgctgacccttctaacaacgcaatgactcctgtgtcaggcatcaccaaggggcgggacattgactttgatgaccaggagcagcttgtttattgggtgcagagcactggttctatatggcaagtggaaactagtggaaccaacaggtctgagtttgctccagctgctttcataggctcaccatccggtctggcttttgattggataggccgaataatgtattacaccaatcccaccgttaaatcgatagaggttatccgcgtggatggaaacgagcactacaggaagaccctcatcacctctactggtaaaccagagggcgtaggagagcctattggaattgcccttgatccagtcagagggagattgttttggacggacaagggctcagatagtggagttcctccaaaggttggcagcgctcaaatggacggaggaaatgtcatcaacctctacacagggaatctggttaacataggattcatcgccgctgacatctcaactcagaaactgtactggggcgtggcgggctcaggagtgatcgagtgtggcaccatggatggagtaactcgagtgacagtggtgagtggcctgtcccacccatgggggctggagattcacgagaatcacctttactacaccgacctggactttgaggtcattgagagggtggacaaggactctggtgccaacatggtggtgatgaggagcggcatgtctggcctccatgccatcaaagtgcatgccagagacaactcagcagggaccactaacgcctgcagctccaacaacgggggctgcccccacctctgcctgcccaagccaaacaatgagaagacctgtgcctgcaccacaggcttttacccgtctcatgatggcaccagctgtgaacagtatgaatctttcgctgttgtctccacctccaagtatatccgtggcttccacataaacagctcggaccactctgaggctatggtgcctgtcgctacctactccgttaagaccaagctggacctccattttgagtctggctttatatactgggctgacaacagcacctccagcacatacaggggcatcttcagggcgaaaacagatggagcgtcttacaggagtgtcatcacctcaggaattggaagaggtggcatccatggcctcgctgtagactggattgcaggtaacttatacttcacaaatgtctttgagagccagacctacctggaggtccttgccatcaacaccagctttcgaatgattctcctcaagtccaccaacgaccagcctcgtgatctggctgtcagccccaagcttcgctatctcttctggactgattatggccaaacacccaagattgagcgggccctgctggatggcaccaaccgcactgtgctggcatcagaaagcctagtgtcaccacgtggccttatagttgattacaccaacaatttcctctactggacagacgatgctctcgatatgatctcccgaatggccgcagatggaacacagagagagattatccgttatgggagccggtatccgtctccaacaggactggctatatttggaaacaacatgctgtgggtggataaaaagcttgggaagctcttacaggccagcaaggaccctgccaattccacccagccagaggtaattcgagacaatcttgatcagccaatggatgttgtcatctttgacgttcatgtccagcctacgtctgcccaccaggtgggcttcaacccatgtcacgaagataacggacggtgccagcagctctgcttcgccataccagaccaggaaaaaccaaaatgtggttgtgcacatgggtcactccttagtaatggagtcacatgtggttatggtctagatgagtttctaattttcaccacagactacacactgagtagcttgaggttagaccctgcagatcacagcgccccctatccaacggtgagcatgggctacggcttaatgggtttggattacgactttgaggataagcgaattttcttcacccagtatgcggggtatggtcggagcagaattggatccatcatcacgacatcggccaccagccctcctgtctttatagctacagatttggacgacccagaaggattggcatatgactgggtccacaagcgtctctacttcactgactactatgcccagaatgtgcagtccatgggcacggatgggacgaaccgctcaattatcgcccatggataccgtccgagagccatcattgtcgacccctgctatggttacctgtactggactgactggggctacccagccaagattgagagggccacattgggtggaaatttccgcaccgaaatcatcaacagcggtcttacaacacccaatggtctttctctggattatgaagaaaggatgctctactgggctgatgcctcaacaaaaaagattgagcgctgcactcttaacggtgagaaccgccaagtgatcctccagggggtccagtatccgtacgctatgactgtcttccaacaggacatcttctggaccgactggtctgagagagctatgtttagggctgcgaaggatgatggctctggcctcacagtgatagctcaggaaatgcagtaccgtcccaacgacatccacgtttataccggatctaagcaggagagctgctccagctcctgtcagcagttcaacggaggctgcagtcacgtctgtgtttctggtccatcaggtccagagtgccagtgtcctcatgaggggaagtggtacctggccaacaatggcaaagactgcatcaaagacacaggaaaccgctgtcagccagagcagttcacgtgcctcaacggtaattgcatctcttcgcattggaagtgtgacggtgtaaacgactgccaggataacacggatgagctggagagagtgtgcgcacgctgttattccttttccgtagccttccacacctgctcatccattgacttcacctgtgacaatggccgctgtgtgcggctctcatatgtgtgtgactacacaaatgactgtggtgacaacagcgacgagcgaggctgccccttccccacgtgtaatcctgcctctgagtttacctgcgccagcgggcgctgcatcagtgcagactttgtctgtaatggcatcaatgactgtagagacaacgcctctgacgaaatcaactgccctgacaggacgtgtcctgatggccggatcaagtgtgaccacaccaacatctgcattttccctgaaagcttgtgtgatggctacaacaactgtggagacaacagtgatgagaatcctctcttctgtgcgggtcgtacatgccctccggaccagttccgttgcgatgaggggaagtgtatctctacctcttgggtgtgtgactccatccacgactgccgcgatgggacagatgaacctcctacttgtgaggacataatcagaacctgcagttcaggccagttcacatgtacaaatggaaactgcattcccgggtcaatggtctgtgatggtaacaatgactgttgggacagtagcgatgaggctgttgaactacagtgtggccaacgtacctgcagttcaggccagttcacctgcccgacctggcacccaggccacccccgctgtataccattaagttttgtatgtgatggggacaaagactgtgccaacgcagctgatgagctccagaactgccccaaccgcacctgccatatgaacgagtttgcctgttccaacgggctctgcatcctcatcccctaccagtgtgaccgtgtgaacgactgcggggatggcagtgatgagttgggctgtacttatgacacctgcagcagcaacgagttcacctgcggtaacggagcctgcatctcttcccactacacctgtgacggcgcgagcgactgtctggatggttcagatgaggcggacagcttgtgcatcaagcctcagcccacatgttctcctcagcattacatgtgcaagtcaggcgagtgcattgacatcgctaaggtgtgcaacgggcagaaggactgccaggatgaaagcgacgaaaaaggctgcggaatcaacgagtgcaacaacccatcaatccacatgtgtgcccagatctgcaccgacaccctcaccgggtactactgctcctgcgaccccggctaccaactcatgccagatggcaaagcctgcgaggacattaacgagtgtgtgagcacgcccgctgtctgcagccaaatctgcgagaacgacgttggctcataccactgcaaatgtgccccagggtacatccgtgaagcggacggacgcacctgtcgtcagaacagtggcattgacccatacgtgttgtacactaatcgctactacatccgcaaagtgagcactgacggctcacagctgagtattgtcctgcaagggctgtccaatgtggtggcgttagattttgacgatgctgagaagaggctttactggctggatacagggacggggaagattgagaggatgcgcctcgacgggactgacagggagacactggcggatgatgaccttttgggagctgaaggcctgacgctggactgggtgggcaggaagctgtactggtccgactcttattacggctcacttcacgtgatggagctggatgggcgttaccagaagaagctgctgacaggacagttcacagatgggaatgccacctatatcatcagccgacctcgtgctgtggttgttaaccctaaatatggatggctatactggacggactggggtgacacagcgtatatcggcagagctggcatggacggcactaatgtcagtgccatcatcaccaccaagctggagtggcccaatgctctgaccatagactacaccaccaacaagatcttctttgctgattcccaccttaactttctggattttgcagacatggacggccagaaccgccaccgggccatcgctggcacacttccccatgtttttgcagtttccctgtttgaggactgggtttactggaccgactggaacacacacgcagtggagaaggcccacaagtacacaggcgaagaacgcacactcatgggcaacaacacacatcggccctcggacattcacatctaccacccctacagacagccgcgtgtgaacccctgcacctcccaccacctgacctgcagccacttgtgtctgattcgccctggtgggcaggaagctttctgcgagtgtccagatcacttcatcggtctctctgtgggcttcaagatccagtgtgtcgctgactgctccagcactcagttccgctgtggggacaacgagaagtgtgttcccatatggtggaagtgtgacggccagtcagattgcggcgatggctcagatgaacctgagacctgccctccccgtgtttgccccattggcacgttccagtgtcgggatggaaactgcacttaccccggcttcatctgtgacgctaaccctgactgccctgacagttcagacgaggatgcggctctctgcagtgaccaccgatgcgaggataaccaattccagtgtaaaaacaagaagtgcatccctgtgtcctatctctgcgatggttttgaagactgttcagatggcagcgacgaggtcacggagacttgttcccagttgacctgccctccgggacagttcaggtgtaacaacgggcgctgtttgccattgagctacgtgtgcgatgcccaggatgactgtggggatgcatccgatgagccttatgaaacctgcatgggtccagactacaagtgtgacgaaactgagttctcctgcaagacaaactaccgctgtatcccccagtgggcccgctgtgacggcaccaatgactgcctcgacaacagcgacgagcaaggctgtgaggacgtgacctgtgatcccctgggagatttccgatgtgacaaccaccgctgtgttcccatccgctggcagtgtgatggcaccaacgactgtggtgacggctcagacgagagggactgccagccaaggccttgctctgaaagtgagtttagatgtgatggtggactgtgcatccctggaacctgggtgtgcgaccacaagaacgactgcggggacaactctgatgagcgggactgtgagctgctgacgtgtcgtccaggttatttccaatgtgactcgggtcactgtatccccgagagtctggagtgtgatggccggcctgattgtcaggacctgtcagatgagaccagctgtcccacgcgttacccaggaggccgttggtgccctcaggatgagttccagtgtacgaaccgtctgtgtgtgagccagagctgggtgtgcgatggcatcgacgactgtggggatcgttctgacgaacagctcagtttgtgcttgaacgtcacctgcgagagtcctggacgcttccgttgtaagaacaactactgtatcttcagcggcctgctgtgcaaccagaaggacgactgtggggacaacagtgacgaagaggaggaactctgccgcgagcctacgctgcccccctgtacactggaggagttcaaatgcaccaacggacactgtgtggctctgccgtacgtgtgtgaccacaatgacaactgtggggaccgcacagacgaattaggctgcaatttcggcaatgatcgcaactgtgaggagaagctgtgccagcaggagtgcaccaacctgaacggcaccggcttcatctgctcctgtaggccaggatacatggtggaccaagaaaacaccttcacctgccaggacatcaatgagtgcgatgttttcggcacctgtcctcaactctgtaagaacacaaagggtagctacgactgcgagtgtgcccccggctacagaaaagtgggtgacggcaacatgtgcgaggctgagggatcggctcccctgctgctgctaccggagaacatccgtatccggaagttcaacctgcaggcagagaccttccacgacttcctggaagaagaggagcatatcatggctctggactacgacttcgaccacaacaacactggattcagtatggtgtacttcactgtagccagtcagggtgctgcacgaggtgccattaagagagcgtacataccttcagtggatgatggcagtaataacatcgctgttgctgtcgacctcggcatcagatacatcaccacaccagacggcatagctgtggactgggtgggaaggaacctttactgggcagactccaagctgaagcggatagaggtggccatgttggatggacgctacaggaagcacttggtcaagactgaactgggccacccgtcagctgtggcagtcaacccacgactggggatgttgtactgggcggaccgtggtgacggcgcagccaagatcgagtgctcttggctggatggccaggagaggaaggtcctagtgggtgatggcctcggttggcccactggcctgtcaattgactttgctagtggtgacagaatctactggtctgactccaaggaaagccacatcgagtctgttctgccttcaggagatgggcgtcaaactgccgtctacattgatgtgagaaatcctttcagtgtttctgtgttcgaggaccatgtttattggagcactcaggagaaaggtgaggtttaccgacaggacaagttcggcaagggggtcaaaaccaagctgctgactgttggaccgtggctgacccaggtttctgtgtaccagcagcagagatacaactccgttgacatgaagaatccgtgtaagggaacctgcagccacctgtgtttgctccgaccaggaggttacagctgcgcctgccctgagggcaccagctttgctccaggcagtcacactgaatgtgatgctgggtttgatccaccacccaccatgcctcctccatgtcagtgtcaaaatggaggcacctgctactttgacgacaaccaggctctctgcatgtaa
>ENSSAUG00010005337|cast
atgggccagatactgagctggatccgaggcccacgggacgccccggccctgcgggatgtggccgtggaggagcaggtacacggcaactaccggcccctccccttaccccgacaaaatttctaccagtcgcagcctagccaggccacacccaaaccagccgctcaggtctccaccgtgaagcctgctcagtacgagaaggcttcatcaggatccgccatggctacaaagcctggggtggtttccacagcgacaggtggagccacaggaagtggcgtcaaagcaggaggaagtgcttcaattgggactgcaggaaaagagtcacctaaagccaaaacagaggtgcaggtggaggttcctcccacggcagccaaaggagcaaaagagcctgctgtccctgccgatgtcaaaccgaaggacgtccctaaaccactgagcacagacgaggccctggattctctttcagctggtttcatgtcttctaccactccagctgcaggcatgcagccagagaaaaagggccacgtcgacgttgtcagcgcctcatctgccggccctgctaacttcgcaccacctcctgtgcagaaatctcaaacctctgccgcagctcctcctgctgataaaaaagccaggatggagaaagcttctgatgatgtctctcagaaggctgggcgcccctctgctccttccaagagcgcaatgcctcaggacgctctcagtgctctcgttgactcgttgccagcagacataccaaaacctgaaccccccaaactcagacctgaggacatggtctcggagggtaaacacaagaaggagaagggtgttcttgtaggagagagggacgatacaattcatccgaactacaggtttgatgaggagaaactcaaaaaactgcctgctcccaaacctgagcccaaaatagccactagtgatgctctggactttttgtctgaaggcttcctggactcctcagtggctcctgtacagaaagcccctcctgttgctgtgtgtcctgctcctgctgataaaaaagccaagatggagaaagtcggtgatgatttctctctggaggccggactctctgcttcgacggccaagaaagtggaatcctgtgccgtcccccctgtggctgtgtgtctctctcctgctgatcaaaaagccaaagcagggaaaagtgctgccggaaaggacagcactgacggcaagctcaagaccgatctgggaaacatgcctctggacgctctcagtgctcttggtgactcgttggcagcagacaccccaagacctgaactccccgaagtcaaacctgaggacatggtctcggagggtaaacacaagaaggagaagggtgttcttgtaggagagagggacgatacaattcatccaaactacaggtttgatgaggagaaactcaaaaaactgcctgctcccaaacctgagcccaccttggcccccggcgaggctctggactttttgtctggagacctgatgacctcctcagcagctccctctgtccaggctcccgttgtcaccccctcagctcctcctgcacagaccaaagtagaggatttgtcagctctggatttactttcggacgattttgtggctccaaccaaagcttcaggagtccaggcccctgtccctccttctaccaagaagaagacaccagagaaaacggtttgtcccagctcagttgatgtcgctcctgcaaaacccaagactgacgactctttgtctctggacgctctcagtgctctcggtgacacactggcagcagacacaccaagacctgagctccccgaagtcaaacctgaggacatggtctcggagggcaaattcaaggaggagaagggtgttcttgtgggagagagggaggacacacttcctccagagtacaggtttgataaggacaaactccaaaagctgcctgctcccaaacccaagcccaccattggtactggagacgctctggactttttgtctggagacctgatgacctcctcagcagctcctgctgtccaggctcccgttgtcaccccctcggctcctcctgcacaggcctctgatgacttcgccctggatgccttggcaggagactttgtttccaccgctgctgctccagtagttaagtctggttttgctcccccaaagactgcccggcagctgtcagggggaacagacagcgccctggacgctttgtcagacaccttgaaggatatcacacccgcaccccagcccgccccggtcccgagtaaagacttcgtcaaggagaaaaagattgttgaagagaagctgataaagatgggagagagagacgactcgctgccgccagagtttcgacccacagaggaagagcgtaagaaaattgaagaatcaaagaaaaaggcagccgcagcacccaagcagaagtctatggatgataaaacagccttggacctgcttgccggtgatttcgaaactgctccaaagcccgctgcagctgccacatcgtgtgcagccgcgacaaagctggaacctcctgtgctggactcagatcccctgaagccaatggccggtcctgtcctggacaacctggcaagcacgctgctcccagaggcggtcaaaacaaagacagacaaaccaaagggcaagaacaagtcaaagtccaggtctaaaaaacaccacgcagaggagccatctgccaccgacctgctagcaggtcagctcagctcagacgtcgtgccaacatctacaaagaagggaggcaagagctagaccacttggtcggcggtgtaattcgtcctcccggccacaggggcgtgtcagcgagggggagcagctcgatggcgacgattctatttttctaaattgtcaagaatgtacagtttatgtgctggatgagagatgaacttaagacacacccatatcacttgctcgacacacacagacacacacagacacatacacacacggagctctgcctgcggcgcctttcttgctcggtttcgcctgtatttaaggatgagaggcttgtggtgtcaatgagatattttttttttttttaaactagatggagaatgagaaggggaagtgtgcagggacatagaggaattgaagacaagtgaaaatgttaaggttttttttctggttggtgtgatgagcttgccgaaggaagaaaggcgctgctcgtcagagtcctgcgcgcacatctcagctgacggtttccatggctcaagcgccactgatgtcacgcctcactgctcctgtgagctgtgacattggtcagcgcagcggtgactgtcagctggcctgggagcagtgaggagtgggtgtatagtatcgggatgtttgtgcaatcttgatgtacacagaaaaaaagccaagttttcttcttttttttttatcacgatgtggtcagacgccttaaggacactagtgtacagcttagtttgcttgtatttttggacaacacatagtttacatgatatctggaggattttccaggaggtgatctgcttaaatccgtattcgagagcttctcgcaaatgcctttaactttctggagagaactgtatgtcatgaggagggtctgtatgtatttggctgtgtagagaaaaaaaaaagaaatgctggcgtccaaaagtgcacttagtgagctgaggtggttacaagctttggaaactgcctttatttgtatactgtacacataaataaaaaaataaaaaaagattttttttgctctaca
>ENSSAUG00010005440|igf2r
tactgatttggtccggagcggatagactctgctgtatcatgtcgtcttagtccggctccacagacagtatccaccacagtaaacatgtcatttctgtgcaaatctaaccgctcttcgcctccgaggctggttctgtggttagcggcgtgtctgggatgtttgttggtccggtccgctgcggagggggacgggagcctgtggtaccaggacctctgcagttataagtgggaagctatagaccgggataataaagtgagctatacgataaagctctgtgagtcgtcgccaacaaccagctgtggccccggcacagccgtctgcgctcaggacctcaccaccaaaacagaccagtctgtcggtgatctgtccatgcagcagctctctgacagggtgctggacttcaatagcacacaaaaatgtccaggaagtgacaacaacattcagagcagcatcagcttccagtgtgggaaaaccatggggaccccagagtttgttgctgtgtctcagtgtgtgcattactttgagtggaggacgtacaccgcctgcaagaatgaccgattcaaaccacaaaaagaggtatgtggtggaacatctgatggaagcactgacctcaaccctctgatcaaagtgagcgacggctatctggtggacgatggtgacgacagtatcgacttctacatcaacatctgcagaagcctcaaccgtccagacaaatcctgtcctgaaggatctgcagcatgtctggtcaccagtcagggctcctacaacatgggcgctccctccaaacagctggagctggtctccagcgacagactgatgttacagtatgaagccagttccagtgtgactcctcccgaattctgccacggacacattcccgcagtcaccatcaccttcatctgtccatcaagcagacattcgggcagcactcctaagatgaccgcagaggtgaactgtcgctacgaggtgaactgggtgactgaatacgcctgtcacagagactacctggagagcaacaactgcaaactgaccagcgaacagcatgacatgtccatcgacctgacacccctcaccttggcctcagatattccgtacaaatcacattctgggcccagtgatggcgacgaaagctacatctactacctgaacgtgtgtggaaagatcccaaccacagaatgtgatggtgagaagtacatatcatcctgccaggtgaagaagtccggaaaggtgccgccgaaggtggctggaaaatataagaaccagacactacgttactcagatggagacctgactctgatctacccagatggcgccacgtgctccaccggcttccagagaatgaccatcatcaactttgagtgcaacaagactgcttccaatggcgggcgtggaaatccagtttttgcgggcgagacagactgcacttattattttgagtgggagacggcgttcgcctgcgtgaaggagaaggaggacctgctgtgtcgagtccgagaaggaaacaaacattacgacctttcacccctcacaagataccctgggtccgattccagcgggaactgggaggccgtggacgctcagtctccgaggtcggactcacgtttctacctcaatgtctgtcacaaagtcatccagtcaggagctgctgatggctgcccgctgaacgcctccatctgtgccgtgggtaagaataaggataacaggcacttcagtctgggcagcttcctctcctctccccataaggctcaactaggaaatgacatcagactggtctatactgaagggagtttttgcgacaatagaaagtcgaggatccaaacctttctgacactcaagtgcaaaccaggagatctggagagtgctcctgtcctgcgtagtgtttcctctgatggatgtaagtacgagttggagtggtacaccgctgccgcctgcgtcctctcgaagacgcagggagacgactgcaaggtggaggacgctcaggctgacctttccttcgacttgtcgcctctcaaaaaagacggcggctactacaacctgaccagcggaagctacgattactacatcaatgtgtgtggtcccgtcaacactgccaactgtcccgaaaaggccggagcgtgtcaggtcgaaacgaggagtaccttgtttaatcagagttcttggagtctcggagaagcgaactcccgtctgtcgtattacgacggcctgatcctgctgacctacagtaacggctcccgctacaacaacaaagaacacactctcagatccacactcatctcattcctctgtgacccgaaagctggagctggaaaacccgaattccaggctgaggacaactacacctataacttccactggtatacatcctacgcatgtcctgagaggcctcatgagtgtttggtgacagatccaaaatctcttgagcagtacgacttatccagtttgtcacgctccacctccagcagcaactgggaggtcttggatttgtctgaacccaagaacctgaagaagtactacatcaacatatgtcggccattaaacgctgtcccaggctgcgaccaccatgcgtctgtctgtcagatggactacatgtatgagcaggtctgtaacatcagtaacatgggtatgtccaagcgagggcctgtcatcgagggccgagaccggctgctgctggagttcaccgatgggtccgtctgcatttcggatggccagaggctcacgtacacgacacacatccacctggtctgctccagaggctctgagtcaacgggcccgcagttcctgatgtaccagaactgtaccgccaacttcaggtgggagacgagagcagcgtgtgccatcaccaccaccgagaatgataatcaaatcatctgtgctgtggtcgaccccaacactggcttcctgtttgaccttaagcttctagccttagagaagggatacaggacaaaggcaaatggaaaagacttcttggtgaatatctgcgcagacgtggcagaatgtggaaaggacatggctggctgtgagctggaagaagggcatcctgtgagcccagttggggtgaagaagaccctccagtactccacagatggccatctctcactaacctatcggggacaactggacagttccacaggtacaaagcgggacaccttcaccattaacttcgtgtgtgatccaaactctcatcccggctcgttaaaactgctgcaagaggacatgagctctttaccggacaacgttgtggtccacgacgtcctctttgagttctccaccgccctggcctgcatccctgctccagttgactgtcagatcattgattctcagggtaacgagtacgacctgaggcagctgatccgggacgtagacgacagcccctggatcgccatagacacagatggggtcaaatcacgcagcttttacatcaacatctgcaaacctctccccactgtgaaggactgtccagtgggtcctttgggagcttgtggtataatcgatggaaagggttacaacctgggatacgtccagtcgaggccacaggcggcggaggacggctccatcagcatcctgtaccagaacggagaccgctgtggttctacgtcccgctactcaacgcgcgtcatcctccagtgtgatgaaaacccaggctcccccatgtttgaccgtgaagacggctgcgaatacatcttcatctggaggacatcgaaggcctgtcctgtcaggaagtctcaaggtgataactgtcgggtccgtgaccccaggactggctacgaatttgacctgagctctctgaaaggtaaagattacggcgtcaggaatgaaaagtacatgtatcacctgtccgtctgcgggccgctgcagaaaggcatctgtacccacatcaacaccggcaacgatactgtggcctcctgccaggtggatggcaccaaggagaagattggaggactggcaaaccaggtcctgagttatgtcggagaacagctgatcctgaactacactaatggagagatctgtcatcggatctaccagagatccacagagatttacttctcctgccaccgtgacagacaccctggagtaccagagtttatcaaggagactgaggagtgtacctacctgttcagctggcccaccgctctggcctgcgtcccggtcaaaaccaccagctgctcctacaatgatggtcagggccactcgtacgacctctcccctctggcgatggactctcgcaactgggaggtggagcactctacagaggacacgaagaaaaacatttacatcaacgtgtgcaggtcgctggtgcagcagggaggctcatggaagtgtccctccagtgctgcgtcctgtatgaaggttggaggtgattatgtgagtctgggacaggtggagtccggtcccgtgtgggacagaggtgtcctgaagctgaagtacagcagcggccaggtctgtccagatggaatccgcaacagtagcagcatcatccgcttcaagtgtgaaaaagacaaagtggactcccgtcctactctgatctctgccgtcgagaactgtgtttacaatttcctctggctaacagctgctgcctgccctctaaacagcacccagcacggcgactgcagggtcaccaacccagcgacaggtcatttgtttgatctcaacaccctcacgaaggaaggaggttacaccgtgtaccaccaacaggaatacaagaagatgttccgcatgaacatctgtgggaacgtgaccaatgctggatgcagcccaggaaccgctgtgtgcattaaggatacaaagactgcggtgagcggcggtcaggtgagcaggaaactctcatacaaagatcatgttctggagctgacatatgaaggaggaagtccctgcgcagcgaaccccaacatccaccacaaaaccatcatccacttcatctgcaggccacctaacatgggctcaacccctccagagccagttctcattgactccaacgcagagacctgcacacactacttctcattccacacaccgctcgtctgtgaacagccagtgaggtgttcagtccagaacagctctggtctcatagacctgactcctctgattcatgtcagtggatactacacagcaacagatgaggcgatggaccaaagtgatggaactccagacttctacatcaacatctgtcagcctcttaacccgatccccggggtcacctgcccccctggagcttctgtttgtatggatcctgatgatggacctcctgtggacatcgggcggacgaccagtggccctgagatcaacaatgtaacaggggaagtgtccatcacttacttcagctccaccaagtgtgtgtcgaaccctgcacagaactacacctcaaccatcatattcacctgccagagaggagtggagctgggttctccgcaaatgctgaagcggcagggatgtgtctatttgttcgagtgggcaactcccgtcgtctgttcagacaccacaaagaccagcggctgcaagctcaccgactcccagctgcagttcacctttgacctgtccaccctctctggtgaagtccaggtcccagcaggctccagcatgtatcacatcaacgtctgcggctcagtggcagagctggcctgtaagaacagtgccgtatgccgggtgtctggttctggttcagagaagactgcttcatcatttggcatcagcaaggccatgacgatggacttcaaacatgatgagcaggccgtgctgatgcagtatggtggaggagatttctgctcacctgtgaccactgagcgggaggtatgtgtgttccccttcacctacatgaagaagctgtacacagactgcaccacagatgggggcactgatggcaggaagtggtgcgccaccacctccaactacgacaaagacaagaagtttggatactgcaatgcgaccaaagataatggtcagtcatccatattgttcacctgcgaccagtctgcaggccacggctctccactgctgctctcagagacagcaggctgttcggccacgtttcagtggcggaccagtgccgtttgtcctccaaggaagatggagtgtaagctagtgagccaacatcagaccttcgacctccggactctgtcctccctcaccgagccgtggaagttcagccaccatggagattcatatttcatcaacctgtgtcaggggatccatggtggactaccaggttgtccagaggacgcgactgtgtgcagacgctcagcagcaggaaaagtccagatcctgggccgagtctatacacagaaaatgatctacactgacggaaagatctctgtcagctactcagctggagacgatgtctgtgggaacggcatgaaggccaagactgtgatgcagctgagctgtggctccactgtcggacaccctgccctcatcagcagtgctaatgaggcgtcatgtgagtttgtgattggctgggagactcggtcagcgtgtgccgtgaagcaacgggaggtgacaatcgtgaacgggacgatagaggttcctgatactggggccagcctcagtctgggagagctctacttcagccaccatcaggcgtctggagacatccgtcccaacggtgaccgctacatctaccacatccagctgtcaggcatcaccaacaactccctcagcagctgtctgggtgccaacatctgccaggttaaactcaacgggcagtacaggcgcaggattggctcctcaaacaaggccaagtactacattaaaggaggaaacctggatgtgatggtgccctctgagtcaacatgtggacgagagaagaccaaaatggcgtactccaccatcatgttccactgtaaccccactgcaggcgtcggcatccccgagttcatgctggagacggatgaatgccagtacctgtttgtgtggcacaccaaggctgtgtgtggtctcacaactgttgaagcaaagtcatttgacgacaacagcgacaccctctctaggcggagcaaggcggtcggggtgatgctgacccttctgctggtgggtctggttgcctgtctgctcgggcttttactccacaagagagagaggagagagctggtgatccagaaggtcgccggctgctgcaggagaggaaaccaagtctcctataaatattccaaggtcaacatggatgaagaagggggtgaagaggagatggagtggctgatggaggagctcgaagccccgcccacatccttgtcctcctcctcccagcggggcaggagtaaccacggcaacggtcacatcacgaccaagccagtgaacacagacggcctgcgctcgttctctctggacgacccagacgacgacagcgaggacgaggtgctgagcgtccccggggtccgagtggtcaaatcctccggactctccaggcactctgcggccaatcgcagcgccttcctccaggtgagtattgcctctggcatcagtccaggtgttactgcgccctccaataggaaacgggacgaggacgacagtgacgaggacctcctcagggtgtga
>ENSSAUG00010006640|capn2b
atgtccggcgtggcctccaccctggccaagaagcgggccctggctgcgggcttcggcaccaacgccaatgcgacgcggtacctgaaccaggacttcaagaccctgcgggctcagtgtagttccgccgggaagctgttctgcgacccgaccttccccgccgcgcccgaagcgctgggcttcaacgagctgggccggagctcctacaaggtccgcggagtcacctggaagagacccacggaactggtctctaatcctgagttcatcttgggcggagccaccaggaccgacatctgccagggagctctaggtgactgctggctgttggcggccatcgcctcgctgacccttaacgagtatgtgatggccagagtcgttcccactgaccagggcttcggtgacgactacgccggcatcttccacttccagttctggcagtttggtgagtgggtggacgtggtgatcgacgaccgcctgccggtcaaagatggagagctgatgttcgtccactcggcggaggggagggagttctggagcgctctgctggagaaagcctacgccaaagtgaacggctgctatgaagcgctgtctggcggttccaccactgaaggatttgaagatttcaccggtggcatcgctgagaactacgacctccaacgtccccccgccaacctgttccagatcatcaagaaggccctggaggctggagcgctgctgggctgctccatcgacatcaccagcgccgcagactcggaggccgtcacccgtcagaagctggtgaaaggccacgcctactcactgacgggagctgtggaggtgaacttccgtggccggaatgagcggctggtgaggatgaggaacccgtggggtcaggtggagtggaccggagcgtggagcgacggatcgtctgagtggagccaggtgcagggagactgtccacatgccaacgcagaggacggagagttctggatgtccttcagcgacttctgccgtcactataatcgtgttgagttgtgcactctgacccccgacaccatcgaagatgactctgtcaaacactggagcgtcagcaagttcgatggctcctggaggagaggatccaccgctggaggctgcaggaaccacccctacacgttctggatgaatcctcagtttgtgatcaagctggatgaggaggatgatgaccccgatgatggcgaagtgggctgcagctttgtggtcggtctgatccagaagaaccgcagaaagctccggaaacaaggagaggacatgcacaccgttgggtttgccatctatgaggtgagaactgaagacactttaggtttaggaccagatcaatacaactacttcctgacccacgctcagacggcaaagtccgaaaccttcatcaacctgcgtgaggtctgctctcgcttcaagctgcccccgggagagtacctgatcgtcccgtccaccttcgaaccgcatctcaacggagacttctgcatccgtgtgttctctgagaagcagactgagacccacggtggagctcaggaccatcatgaacaagatcgtctccaaacgtacatcaaagctaaagcttcagcacccgctcacctgctcacctgctcacttgttcacctgttcacctgctcacctataacttcctgtctctccctcacaggaactgacatcaaaactgacggcttcagcctggagacctgcagggtcatggtcaacctgatggatgacagcgggaacgggaagctcggccttggagagttcgccaccttatggaagaaggtgcagagatacctgtccatctataagaagaacgactcggacaactcggggacgatgagcacgccggagatgagagtcgcctttaaagacgcaggtttcagcctcaacaacaccatctaccagctgctggtggctcgatactccgacccagacatgaccatcgacttcgacaacttcgtgggctgtctgatgaggctggagatgatgttcagtgagtcacaccgagctacacgtcaactacaactcccaacatgcactgtgagaaccaacaacacgaacttcatcatgttgaatcggacccggtttcgcctctga
>ENSSAUG00010006340|foxo1a
atggcggaagcggcccagcagccacacctggtggagatcgacccggattttgagcccctgtcgcggccgcggtcgtgcacttggcccctgccccggccggagttcatcaacccgggcgactccaacacgtcctcgccggtgccgtccgtgaagcaggagcccgccggcaacagcgacttcatcaacaacctcagcctgctggaggagaccgaggacttcacggagcagaagcctgtcatcctgtgcactgatttccagtgtcaggagaactgcgtccaccagcaacctccacagcagcaacatcagcagcaacatcagcagcagcagcagcagcagcaccagaacccgcaactcccgcatcaccaccatcagcagcagcagcagccgcagcagcagcagcagcaggtgcctctgctctcctccccggtgggcacttcgtcctcggcggccgcagctgccgccgctgcccagaggaagagcagctcctcccggcgaaacgcgtgggggaatatgtcatatgcagacctcataaccaaagctatcgaaagttctcccgagagccgactcactctgtcccagatttatgactggatggtgaagagtgtgccttatttcaaggacaagggggacagcaacagctctgcaggctggaagaactccattagacacaacctgtcactgcacagccgctttgttcgtgtccagaatgagggaacgggaaagagctcgtggtggatgctaaacccggagggcgggaaaagcggcaagtccccacgccgcagggcagcctccatggacaacaacagcaagttcaccaagagcagagggagagcggctaagaagaagctgtccctgcagggcggccctgacggaggtgcagacagcccgggttcctactccaagtggcctggcagcccaaactcccacagcaacgatgactttgatgcgtggaacagcttcaggcctcggaccagctccaacgccagcactctgagcggccgcctctcccccttcatgcccgaggacgacctcggggaggccgacgtgcatatgggctacccaggagcccccggggcaaagatgacagccacgctgcccagtctaacagagatgacgggctctctgggacacagttctgagaacgtcatggagaaccttctggacaacctgaacttgctctcgcccaacaactctcaggtcggaggaggggccacgacccccggctcctcccagtcctccccctctcctatgatgcagccgagccctggctacccggcctacagctcccccagcatggtctcacagcctcagcaggagtaccgcaagtgcgtgtacggccaagcaggaatgaacacgctgtcgtccatgccgctgcagagtctgcaagagagtaagcccagcttcgggcccacgatgggccagtacagctgcccagcagggcttctgaaggagctgctgacgacagatacagaccagcacggcgatctgatgccgtcagtggacactgtggtgtctcagtccggcggaagctgcatgctgccaccttacagcagcacccagcatgcagccaaactaatgggtggagggaacggtcacccacacggtctctctcacactcactcccacaatgtgcacagccaagccccggccacgtcaccagctatgaacggccgcttgcttatgcccctgagccacagcgggggggctgcacgtttgcctgcagccaaaagccccatgcagatgccttatggcctctccggccacctcagtggcgggggcatgcccggtgtcttctgccctatcaacaccaacgggtacggccggccaggcctgccacagcccttgcatcaggaaaagctgcccagcgacctggacgacatgtccatcgagaagtttgagtttgacatggagacggtcctccatgacactctgatggacggcgactccctggacttcaactttgagccaatggtgacccagcaaggtttcccccacggagtgaagaccaccacacacagctgggtgtctgggtagaaacaggctgctcaactgacttgttgctgtttggtcaaagacacaatcggaactcatctgagataaagtgcatctgaggatgtttaaacctcaacttcacctacagtttctataccgtcaacatttctgtttcaaaaatacttttctggtcacttcaggagactgaaactggtcacgatctgctgagaaagcatctccattagtttctctgaactggtgaagatgaaatcagacttatttttgaaatatcaaatattctgtacaaactaagtgccaaacattatgccttaacgtaagagccaaactgaaacacacctctctggtttactcatcaaggttacagatagcagcagcacaatctgtgctcaaagtgctcacactcaagctgtttactgtgtctccacaatcagacttttttgtatgtgcagcgtagtgataatcgatcaccactacgtctgacggcgtgagggtaatctggctcatgggtttgtgaactgacatgacgttgagtgacttctcaagggatcctcggatgatgttacataataactcactcttgttatcgcctgaatgtacatagtgtcaccatacagtttgtaaaatcaggtctcgtagtgtattttctaagactgtaaatagtgtttacagagcggaagcaaaaatcaaggcagcagaaatgagctcacagagaaaactggatcagattcttttaaacacgtgttgagtggaggattcttttcagtcagcctgtaaagtggtaacacacgttgtgattttcttgtacatacgttaagaatgtatattaacgtagatgtttactagatgtagtatatatttgagacctaaattatttgtggttaatatagatttatgctggtgcgtaacctgcactcagacatcagtttgttctgagtcattcgtcactctgaaccttaataccacaggggcctatttattgtgcctaacatagtagatatcgactgcaggcttgaagggttttatattgtaaatgtctacggtccagaagatgctcaaatcttgcggtcttgaagaattctttattttcagtttcctgctttttacttcgtttacaagtcaagaagagacgagttaatgttaaagttgtcctgaacccatcgcagagctgtgaatgttacgaggtcgaggcaggttggtggagaaaaagatatcctcagtgccgctgtggttttcacagcaaggcccaatccaagacctgtcggagattgtcattaaagacactgtgagtaaccagcctgtcccctgttcaatttcacatattttcttttttcctatatttgtcccgaaaggttagtgtgactgatttaaatcagcacagcgtgattcaacagagccctgcttttgatgagactccactctgcccctcctacctccacctatctctgtgtctttgtaacagttttgatataacggtgacttgataactccaatcatcttctaaataacaagtctgttttaattgtttttttttttttttttttttaaagtcgcccctgaaaagcgccactaagtgttaactatcttatcttttagcttgtatatttgcattttccaacttgtttttctcacttattgctgtactaacaacgagctttgtcagcctcccagtgacttgttgtgcagactcacaaacggttgtacgttctgtacaaggttgtcgctccctttgtgaagacggtgtccttaaacacgaagtcaactggtttcgctgggtcagagataacaaactaaaactgaaaactgcctatttgacatcagaggaaaagttcacctaaaaaggagatctcagtcatcatgtgctcgccctttcatagcggtggaaagcaaaacagcgtttcagcattcttctgatcaactgaagtagatggggactagttttaaaatggaaaaaaaaccaacaggaaaaagagtataaaatggctctgtacagatcgtttggtgtatttttaagtttctggattgattgaagaagacattatttacacactcaatacacggtcgattctcttgcactcagccgtgctagcactcttagcttagccgctacagtgaagtttccatcttaaaaaggtgtgtaaataatgtctttcgagatcaatttgggatctaggggcatccggaggttatgctggatgggcctacatggagccgtttcaagtttttcaggtttttttttgtttttgtcagtagttttttacattttaaaacgagtccccgtctacttcagtcgttgaggagactcaacaacactgtgctgctgagaagctccacaaatgcttgggttagtaggcaatgactaaatcattatctttgggtgaacctttcctttctaaagagtaaaatgacattcttaatgttttgaaaggccgtgcagagaagccgttaaagaagctgctgtttggctttggtgccaggtgttgccttttcttacccaaacatgccatagtgtactatagccaaatttgccttggaagttaaagtgatatatttagcatttttatcatgtgatatgttcagaattatatatatattcgtgccggtcactcaagtcaggataaactgtaatgaatccatgtagtcagtgtcacagggttcactctaaaaaagtaaaagagctgtactaagtaaattatatctctacatttttaaatgattgaatctatgcattgtattccttaattttatgttgctattgttatattttccttttcctttgaacttatgacagagatattttattgtaacatagcgctgtgagatattatggtgtcgttcgtgtctaaactctatgttccagatagttatatgggaaaaaaatgaagtttatttagaaaatagatgatgcagtgattaatatgctaagcttttgtaaactgacaatgtcgtatttcatgtatttagctacagtttttagaaaaatagcatcaaaaagcaaattactgacaaaatgtaaagagatattgcatttttaaaatgaaaaaacacaatattcagtcctgctctggacgcagattctggaccatttttttgtaattttatgagtgtaaagaaattgcacttttacttacattttataacaaagtgctcctcgtaacacgaggaagagttcccattacatattttaaaataaaaaaaaatctgttacatttaacttatataca
>ENSSAUG00010004401|lrp4
agggaagcaagcacggatgattaggagtcataacgttaaaactcaaagaacatttaaagttttagtgtttggtttgtatctttgtaacaactaccattgaaatgtttgtccttgttgctcatttatgctcagggcatcttagaaataccgcggtggacgcagccagctcccccgcggcttgcgtttggtacggcccacagctccttttggtggctacagcgtagggaaccggagcacaacatgttggagaccgtggctgagctgaagccctcagagttaactttttaatcccgggtttgtcgcgttatcacacacaagaggaggaggcggaggaggtcggggagagaaaaggggctaacaagtcagtcatggtatgaggttagcatgaaagccggagcgtctttcttgcaactgaagcccgttgatatttaactgagaggaggagaagaacaagaacaagaacaagaaaaagaagcagaagagggaaagggggaaaagggaagcccgggagaagcgagagaaaagcggggtacaagatgcagccggccgcggtgctgtggggctccctggtaactttgctgctcagccagactccaggagttcagggcagtgctgagtgttcgtgcgggaggaaccacttcacatgtgcggtcagtgcgtttggggagtgtacctgcatcccggcccagtggcagtgtgatggagataatgactgtggggaccacagcgacgaggatggttgcatgcttcccacctgctcgccgctagacttccactgcgacaacggcaaatgtatccgtcgctcctgggtgtgtgacggcgacaacgactgcgaggacgactcagacgagcaggactgccctcccagggagtgcgaggaggatgagtttcactgccagaatggctactgtattcgcagcctctggcactgtgatggagacaacgattgtggcgacaacagtgatgaacagtgcgacatgcgcaaatgttcggacaaggagttccgctgcactgatggcagttgcattgctgagcactggtactgtgacggagacacggactgcaaggacggatcagatgaggaaaactgtccctcagatgtgatggcagccacctgcagtgtggaggagttccagtgtgcatacggccgctgtatcctggacatctaccactgtgacggagacgacgactgtggggactggtcagacgagtcggactgctcttcccaccagccgtgcagatcagttgaattcatgtgcagcagcgggatgtgcatcaacgccggctggaggtgtgacggcgaatacgactgtgacgaccaatcagacgagaagaactgcaccacgtccatgtgcacggccgaacagttccgctgtggaaccggacgctgcgtccggttgtcatggagatgtgatggtgaggacgactgctccgaccacagcgatgaagagggctgtgagaaaactgagagtcctccatgtgctcctgatcagttccaatgtgggaatggccgctgtatcggtcagaggaaggtgtgtaacgaggtcaacgactgcggagacgggactgacgaacacccacaccatgactgccgtccgcgctccagcgagggcaactgcaaccagaataacggaggctgctcccagaagtgtcagatggtcagaggactggtccagtgcacctgtcacactggatacagactgatggacgacggcaaagcctgccaggatgtggacgagtgtgctgaagaaggctactgcagccagggctgtaccaacacggagggggggttccagtgctggtgcgttcagggctacgagctccgacctgacaagcgcagctgcaaagctctgggtccagagccagtgctgctgtttgccaaccgtatcgacatccgtcaggttttaccgcatcgctccgaatacaccctgctgctcaacaacctggaaaatgccatcgctctggacttccaccacagcctagagttagtcttctggtcggatgtgacgctggaccgtatcatgaaggccaacctcaacggctccaatgtagaggaggttgtgtccaccggtctggagagcccaggtggactggccatagactggatccatgacaaattgtactggacggactctgggacatctcgtatcgaggtggcaaacctggatgggacacatcgcaaggtgctgctgtggcagaacatggagaagccccgagccattgcactgcaccccatagagggtaagatctactggacagattggggcaacacacctcgcatcgagtatgccaacatggacggctccaacaggcgggtcatcgcagacacacacctgttctggcccaacggcctcaccatcgattacgccggtcgcagaatgtactgggtggatgccaagcaccatgtcatcgagagagccgacctggatggacgcaaccgcaaggccgtcatcagccacggcctgccacacccgtttgccatcacagtgtttgaggacagcctctactggaccgactggcacaccaagagcatcaacagtgctaataaattcactggcaagaaccaggagattatccgcaacaagctgcacttccccatggacatacacaccctgcacccccagaggcagcctgcaggtggcaggaaccgctgtggcaccaacaacggaggctgcagccacctgtgtcttcccagcaacaagacgttcacctgtgcctgtcccaccggcttcaagaaggtggaccacttcaactgtgctgacggtcttgacaagttcctgctttttgcccgaaggacggacatccgacgagtcagcttcgacacagaggacatgtccgatgatgtcatccctctggctgacgtgcgcaatgccgttgcgctggactgggatgccaaagacggctacatctactggacagatgtcaccactgactccatcaacagagcactgtggagcggcgccaagcaggaggtggtggtggacaccagtttggaaagcccagcaggtttggcaattgactgggtgaccagcaagctctactggaccgatgctggtacggatcgtatcgaagtttctaatgccgatggcagcatgaggactgtcctgatatgggagaacctggaccggcccagggacattgttgtcgacccgatcggaggtttcatgtactggaccgactggggtgctaacccaaagattgagcgagctggaatggacgcctccagtcgtattgtcatcatctcatccaatctgacgtggccaaatgggctcgccattgactacgagaccaaacgcctttactgggccgatgctggcatgaagaccattgaattcggcaactttgatggttctgaccgacaggttttaattggcagccagctacctcacccctttggcctgactgtacatgaggacaagctgtactggacagactggcagtcaaagagcatccagagtgctgacaagctcactggcctgggccgacacacactggctgaaaacctggagaatctcatggacattcacatgttccaccgactacgtgagacagtgcataacccgtgtttggtgaataatggaggctgcagccacctgtgtctcctggctcctgctcccaaagcctccagctgtgcatgtcccaccgggatcaacctgcagactgatggaaagacctgcacgcctgggatgagcagcttcctggtctttgcacggaggacagacatcaggatggtttctttggatatcccctattttgctgacgttgttctggccgtcaatagctcaatgaaaaacaccattgccattggggtcgaccccaaagaaggaaaagtctattggtctgacagcacgctgaagaaaatcagcagagccagcattgacggaaaagcacatgaagacatcatatctacaggcttaatgacaactgatggcctggcggtggatgccgttggcaggaagatctactggacagacaccggaaccaatcgcattgaggtggctaacctggacggctccatgaggaaagtcctcgtctggcaaaacctggacagccctcgggccatcgccctctaccacgagatgggttatttatactggacggactggggagagcatgctaagctggagcgctcatcgatggatggatcagatcgtgtggtcctcatcagcaacaacctgggatggcccaacggcctggccatagacatggccggctcacagttactgtgggccgatgctcacactgagcgtatcgagtgtgccgatctaaacggacagaatcgtcgtaccctcgtgaccccggtccagcacccatacggtttaaccctgctgggatcccacatctactggaccgactggcagagccgcagcatccagcgagctgacaagaacactgggaccaacaccatcacagtacgagccaacctgccaggcctaatggacatccaagctgtggacagggagaggccactgggttttaataagtgtggcaggaggaatggaggctgtactcacctgtgcctgcctcgtcccaatgggacatcctgtgcctgtcccactggcatcctgctcaagggagacggcaggtcatgtgacgactccccagagtcctacctgctcttctccaaccgtgtcagtgttcgcagaatctccttggacaccaatgaccacaccgatgtgcatgtggctgtgcccgagctgcataacgtcatctcactggactatgacagcgtggacggaaaactttactacactgatgtcaccctggatgtcataaggcgtgccaacctggacggcagtggcatggagacggtgatcagccaaggcctgaagaccacagatgggctggctgtcgactgggtggccagaaacatgtactggacggacaccgggcgcaacaccattgaggtggcccgcttggatggaacgagtcgcaaagtccttgtcaataacagtttggatgaaccacgagccatcgcagtgtttccgagcaaagggttcctgttctggaccgactggggtcacattgcaaagattgagcgatctcacctggatggctcggaccgaaaggttctgatcaacaccgacctgggctggcccaacggcctcaccttagactacgatacacgaaggatcttttgggtggacgcccacttggacagaattgagagttcagacctgaacgggaaactgcgtcagatccttgtcagccccgtgtcccacccgttcgccctcacacagcaagaccgctggatctactggacggactggcagactaagtccattcagcgggtggacaaacacaccggccgtaacaaggaaactgtgctggccaacgtggagggcctcatggacattatagtggtatcccctcacagacagaccggtaccaacctctgtggggtaaataatggtggctgcactcacctctgcttcgccaagaccaacagttttgtgtgcgcctgccctgatgaaccagacaggcgaccctgctccaccatttcaggttacgtccccactgctcctacaagaggaaccagcagcactccagtccccaacaagatccccaaagctccaacagacactccacacagaggaccctcactggtcaactgcacggagaagaacctaaacgaacaaggctgcttgagcaacgtggtgacggctcctcatggagaaggacttcatatcagctatgtgattggcggagtcctgaccatcctggcaattctaatcctcatcgctgcattgattatttacagacataaaaagtcaaagtttgccgacccaggagtgagcaacctgacctacagtaacccctcgtatcggacgtccacacaagaggtcaagatcgaggcatcacagaagcctccaatatacaaccagctccgatataagaaagagggtggagtggacggaggctacaccaaggagaagatccgcattgtggagggtgtgtgtctcctgtccaatgaggagctttactgggatgaccttaaacagatcaagccgtctcgaggcggactgcacacctgcatgcgtacggacaccgtgtccctgcaggccagcagtgcttcgctagacgatggtgaaacggagcagctcctccaggaggaggcgtccgaatgctcctctataaccaccctgaccccttcagccatcaccccgcagcgtcatgcccagcacagcctgcccgacaccggctgggcctccacgcgcaagccctccaccgagagcgaagtgtgagggaggccccctgccctccgtactttatctcaacctccattacctgatacacacctgtatttatcaccggtacaaacacacaaagagaaataggtacaaacacagcaacagttgcattcatagagtaatggtacatatgaacctggttagacgcaacaaagctactataaacacaactcctatatctcaactgaggctccgtcctacttgtgtacacacacacacacacgcgcagtacagtcctccaacactaccttcagcgctactgcctttaggcaaaatcataaactaatgagcatgctggaataagaaagcaaaggactctggggaggaagtgaacagagagacacaagcgttatctggagcctttttaaaggatgcagactctaaattcaacaaacgcttctctgtacaacttcaactttattttttgtgaacttttttttgtgttggacgaagcttaaacgacatactccctggacaacgtaaccacagcactctctctaatgccactcatgtctttatgaactctatttatgaacgtttttgtacttgtggagtgggtttgctgactttcagagaatggtgagagtgttgtgtttgaactttgcgcagcaggacccaggttttcaagagttgtatttatgacagtgccaaagggtggggcttcacagagtctccatgcttctttctgcatttacacttcaatagaattgtatcttaattacaggatgtttgtttcgactttaatgacttgccctcactggttgaagacctcaatgatgacaccaccggcttgtgattccttattttacagcctccaataggtcaagccaggacttactgtagtccattcatcgtttcgttttttttttttttattgtaagtcaaccattgctgattctctggcatagcagaggaagccacgatgaagtaatagcctaagtgccaaacatgttgttctttttgctcctttcagctgtatatttatttttctcagaggttttaaaaatgttcatgacattcgttttacttgggtttggtcacccaaatcacagaaaagcatattttctcagacatgtaccactagggctattcagccatgcagatagttgtggttctatttgcccagggtatggatatatgtctctgggatttcttctgccccaaaatactgggggttttccttggaatggctccctccatccaatctgtcactgagtgtctctttcattgttcctgggctttactatccaggggaataattatctaccacagcacttactttaccgaatttgaagctgtttgatttcaacaacaattcatattttactagtgaaaatcaaacagctttcttgcatctacttcagtgtaggattttgtgtattattcagtgtcatccccaatgttccccttccattgatacccacccacattttgtactgatatgtttccaaattcttatccgtaatctcagctgtctaaaaaaatggatacgccattttgtccatctgtccattctcatacttggcttaaggggaaattatttttttagaaataaaaaaaaatggaagcactgctagaaaca
>ENSSAUG00010005819|CAV3
atgacctgcagccccaccatggcggatcagtaccaatacaccaacgaggagaagatagtgaaggatagccacaccaaggagattgatctaatcaacagagaccccaagcagatcaatgaggacgtggtgaaggtggagtttgaggatgtcattgcggagcctgatggcacacacagcctggatggggtgtggaagctcagctacaccaccttcactgtgtccaagtactggtgctaccgcatcctgtctgcagtctttggcatccccgtcgctctgctctggggcttcctgtttgcgtgcatctccttctgccacatctgggctgtggttccctgcatcaagagctgtctgattgagtcgcagtgcatcagccgcatctactccctctgcattcaaaccttctgcgatcccttcttcgaagccctgggcaagatcttcagcagtgtgcgtgttgcactgcgcaaagaagtctaagtactcgcacagtagtgtttatagtatgatcggatgaagtacggtatctttttatacaccaaaagatcagtcttggcatattggcttactccttcctcctcctcgtcctttcatcaagtgctgcacccaaccctgccactcacaaagctttccgctctcagtcctgacatgactggtgtgccttttgccaccagaagcactttgacagctgcagcaggcggcctggttccctgacagctctggcactcctggagggctcagtgctcctcactgacggagagagaggagggccgcctgccatgaggaggatcgtctgctctcatttatttggatcccaacaacagctactcattcacaaataatgaatgaactcaccaaacactgctgcacctgtggacattactgcctgtatgcattacatttggccttttcttaaaagttgatgctgtatgttgctatatgtgatgttgtttaactttgttctgattgagttcaatcgatgtaaccttagtggaaaagctctaatggaaagaaatgaatttaaaaaatgttttctttgtgttactattttgtgcgacttctttaaattttcaaaacatgtatactgatataactccctgtttctttgtgttgactccaccaaagattaggagacttgcagatgtaggataatctacttccttttaccaaagtgtaataagtgtaatatgaattaataccaactttcttcaatcaagtatgtgtaaacaagtatgaacctaactactagtgcagtatgagacccattttaatgtcccacagtggtattttaattatgtggaatgtgtcatatgtttgctgatgttatgtacatgcaattagacagctgttgtcacaacaatgagcctattgccccaccggttcagtgtttgaaagtgagttctttgtatcatttcaaatcatttttgagaggctctagaatacatttttatgattcacc
>ENSSAUG00010006640|capn2b
ttggagcctttgtgtaagcgggccctggctgcgggcttcggcaccaacgccaatgcgacgcggtacctgaaccaggacttcaagaccctgcgggctcagtgtagttccgccgggaagctgttctgcgacccgaccttccccgccgcgcccgaagcgctgggcttcaacgagctgggccggagctcctacaaggtccgcggagtcacctggaagagacccacggaactggtctctaatcctgagttcatcttgggcggagccaccaggaccgacatctgccagggagctctaggtgactgctggctgttggcggccatcgcctcgctgacccttaacgagtatgtgatggccagagtcgttcccactgaccagggcttcggtgacgactacgccggcatcttccacttccagttctggcagtttggtgagtgggtggacgtggtgatcgacgaccgcctgccggtcaaagatggagagctgatgttcgtccactcggcggaggggagggagttctggagcgctctgctggagaaagcctacgccaaagtgaacggctgctatgaagcgctgtctggcggttccaccactgaaggatttgaagatttcaccggtggcatcgctgagaactacgacctccaacgtccccccgccaacctgttccagatcatcaagaaggccctggaggctggagcgctgctgggctgctccatcgacatcaccagcgccgcagactcggaggccgtcacccgtcagaagctggtgaaaggccacgcctactcactgacgggagctgtggaggtgaacttccgtggccggaatgagcggctggtgaggatgaggaacccgtggggtcaggtggagtggaccggagcgtggagcgacggatcgtctgagtggagccaggtgcagggagactgtccacatgccaacgcagaggacggagagttctggatgtccttcagcgacttctgccgtcactataatcgtgttgagttgtgcactctgacccccgacaccatcgaagatgactctgtcaaacactggagcgtcagcaagttcgatggctcctggaggagaggatccaccgctggaggctgcaggaaccacccctacacgttctggatgaatcctcagtttgtgatcaagctggatgaggaggatgatgaccccgatgatggcgaagtgggctgcagctttgtggtcggtctgatccagaagaaccgcagaaagctccggaaacaaggagaggacatgcacaccgttgggtttgccatctatgaggtgagaactgaagacactttaggccagagggaggtgcatctggacaagaactacttcctgacccacgctcagacggcaaagtccgaaaccttcatcaacctgcgtgaggtctgctctcgcttcaagctgcccccgggagagtacctgatcgtcccgtccaccttcgaaccgcatctcaacggagacttctgcatccgtgtgttctctgagaagcagactgagacccacggtggagctcaggaccatcatgaacaagatcgtctccaaacgtacatcaaagctaaagcttcagcacccgctcacctgctcacctgctcacttgttcacctgttcacctgctcacctataacttcctgtctctccctcacaggaactgacatcaaaactgacggcttcagcctggagacctgcagggtcatggtcaacctgatggatcaggacagcgggaacgggaagctcggccttggagagttcgccaccttatggaagaaggtgcagagatacctgtccatctataagaagaacgactcggacaactcggggacgatgagcacgccggagatgagagtcgcctttaaagacgcaggtttcagcctcaacaacaccatctaccagctgctggtggctcgatactccgacccagacatgaccatcgacttcgacaacttcgtgggctgtctgatgaggctggagatgatgttcaggatcttcaagaagctcgacgctcaggacagcggctccatcgagctcgacttcaaccaggtgagaaccaacaacacgaacttcatcatgttgaatcggacccggtttcgcctctga
>ENSSAUG00010007681|fgf6a
atggccgttgcgcaaaggctcctcgtcagtatgtcctgcgaggccggcacgccgcactggacgctgaccgcggtggttctcctgggctttctgctggggatcgtgtcagcgtacccgttaccgagcggcaggacaaacgcaactttattggagaaacgatgggagaccctcttctcccgctctgtactggggatctccggggagaaaccggagctgaactgggagagtgactatctgctgggcatcaaaagagtgcggaggctctactgcaacgtgggcatcgggtttcaccttcaggtcctccccgacggcaggataaacggtgcacataatgaaaaccagtacagtctcatagagatctccacggtggagagaggagtggtgagcctctatggggtgaagagtgagctgtttgtcgcaatgaacagccgtgggaggttatacggaacgacagtcttccatgacgagtgcaagttcaaggagagcttgctcccgaacaactacaacgcctacgagtctctggtctacagaggctcctacatagcactcagcaagcatggccgcgtgaagaggggcaacaaggccaccactgccatgactgtaacgcacttcctaccccgaatatgagcaaaaactggcaataacaaacttatttgcacatgaggacttatctcccagtagctgccccgcacaccggcctgaacctttgtgctgttaggttaaagagagcacggcatccccattgatcatgcaaccggctttcttctcactcgtcctgattgccgtacatgtgtctgtaccggtggattgtacagcgagcctccgggatccagagcaacttctacaacatcagcagggcggctccagcacaggagcgcgagcagagtcatccgccggtacgggacgtttctacttggagctgagtggatcaatgagaaaaggcattcacagacactttctggctgtcttgccagttagaacagacgcaggtaattttgtgtcaatatttgatctgagaagaagactgttcctctgcatggactttaagggggagctgtacaagtcgaggcaaaaggacagagaagactgtctcttccagcgcatctggttagatctggttaatcaccatgacgtgttttactctatcagtgcgggccagctgctcaaactggaaggagcagagctgagagttgctcacccagagccacccaagccctcctcagccatcatggagaggttccttggtcccttggtaaggagacaaaggaggagcgaggaggtgaacccctctgatccgttaagatcagagtcacatccctcacatcctgccaaggatcacaaggatgcagatcacaggcagccagaacaggaccaggccggcgccgtttccaaagagaccatcacgtcgtgtgacgaccccctgcgggtcttacaggccaacgggcccgtcagtcctgtcaagactaatatcgcagaccgagcaccacaagactaa
>ENSSAUG00010004401|lrp4
atgacttacttttcatggtgggcagctctaaccctctcttcctctgtttgtgcaggagttcagggcagtgctgagtgttcgtgcgggaggaaccacttcacatgtgcggtcagtgcgtttggggagtgtacctgcatcccggcccagtggcagtgtgatggagataatgactgtggggaccacagcgacgaggatggttgcatgcttcccacctgctcgccgctagacttccactgcgacaacggcaaatgtatccgtcgctcctgggtgtgtgacggcgacaacgactgcgaggacgactcagacgagcaggactgccctcccagggagtgcgaggaggatgagtttcactgccagaatggctactgtattcgcagcctctggcactgtgatggagacaacgattgtggcgacaacagtgatgaacagtgcgacatgcgcaaatgttcggacaaggagttccgctgcactgatggcagttgcattgctgagcactggtactgtgacggagacacggactgcaaggacggatcagatgaggaaaactgtccctcagatgtgatggcagccacctgcagtgtggaggagttccagtgtgcatacggccgctgtatcctggacatctaccactgtgacggagacgacgactgtggggactggtcagacgagtcggactgctcttcccaccagccgtgcagatcagttgaattcatgtgcagcagcgggatgtgcatcaacgccggctggaggtgtgacggcgaatacgactgtgacgaccaatcagacgagaagaactgcaccacgtccatgtgcacggccgaacagttccgctgtggaaccggacgctgcgtccggttgtcatggagatgtgatggtgaggacgactgctccgaccacagcgatgaagagggctgtgagaaaactgagagtcctccatgtgctcctgatcagttccaatgtgggaatggccgctgtatcggtcagaggaaggtgtgtaacgaggtcaacgactgcggagacgggactgacgaacacccacaccatgactgccgtccgcgctccagcgagggcaactgcaaccagaataacggaggctgctcccagaagtgtcagatggtcagaggactggtccagtgcacctgtcacactggatacagactgatggacgacggcaaagcctgccaggatgtggacgagtgtgctgaagaaggctactgcagccagggctgtaccaacacggagggggggttccagtgctggtgcgttcagggctacgagctccgacctgacaagcgcagctgcaaagctctgggtccagagccagtgctgctgtttgccaaccgtatcgacatccgtcaggttttaccgcatcgctccgaatacaccctgctgctcaacaacctggaaaatgccatcgctctggacttccaccacagcctagagttagtcttctggtcggatgtgacgctggaccgtatcatgaaggccaacctcaacggctccaatgtagaggaggttgtgtccaccggtctggagagcccaggtggactggccatagactggatccatgacaaattgtactggacggactctgggacatctcgtatcgaggtggcaaacctggatgggacacatcgcaaggtgctgctgtggcagaacatggagaagccccgagccattgcactgcaccccatagagggtaagatctactggacagattggggcaacacacctcgcatcgagtatgccaacatggacggctccaacaggcgggtcatcgcagacacacacctgttctggcccaacggcctcaccatcgattacgccggtcgcagaatgtactgggtggatgccaagcaccatgtcatcgagagagccgacctggatggacgcaaccgcaaggccgtcatcagccacggcctgccacacccgtttgccatcacagtgtttgaggacagcctctactggaccgactggcacaccaagagcatcaacagtgctaataaattcactggcaagaaccaggagattatccgcaacaagctgcacttccccatggacatacacaccctgcacccccagaggcagcctgcaggttggaaccgctgtggcaccaacaacggaggctgcagccacctgtgtcttcccagcaacaagacgttcacctgtgcctgtcccaccggcttcaagaaggtggaccacttcaactgtgctgacggtcttgacaagttcctgctttttgcccgaaggacggacatccgacgagtcagcttcgacacagaggacatgtccgatgatgtcatccctctggctgacgtgcgcaatgccgttgcgctggactgggatgccaaagacggctacatctactggacagatgtcaccactgactccatcaacagagcactgtggagcggcgccaagcaggaggtggtggtggacaccagtttggaaagcccagcaggtttggcaattgactgggtgaccagcaagctctactggaccgatgctggtacggatcgtatcgaagtttctaatgccgatggcagcatgaggactgtcctgatatgggagaacctggaccggcccagggacattgttgtcgacccgatcggaggtttcatgtactggaccgactggggtgctaacccaaagattgagcgagctggaatggacgcctccagtcgtattgtcatcatctcatccaatctgacgtggccaaatgggctcgccattgactacgagaccaaacgcctttactgggccgatgctggcatgaagaccattgaattcggcaactttgatggttctgaccgacaggttttaattggcagccagctacctcacccctttggcctgactgtacatgaggacaagctgtactggacagactggcagtcaaagagcatccagagtgctgacaagctcactggcctgggccgacacacactggctgaaaacctggagaatctcatggacattcacatgttccaccgactacgtgagacagtgcataacccgtgtttggtgaataatggaggctgcagccacctgtgtctcctggctcctgctcccaaagcctccagctgtgcatgtcccaccgggatcaacctgcagactgatggaaagacctgcacgcctgggatgagcagcttcctggtctttgcacggaggacagacatcaggatggtttctttggatatcccctattttgctgacgttgttctggccgtcaatagctcaatgaaaaacaccattgccattggggtcgaccccaaagaaggtatttatttatactggacggactggggagagcatgctaagctggagcgctcatcgatggatggatcagatcgtgtggtcctcatcagcaacaacctgggatggcccaacggcctggccatagacatggccggctcacagttactgtgggccgatgctcacactgaggttagtagtgcaatttttctgctgtcagtccttcttttcagaagaactgttcaacacagctatgagaataatctataccttgtcctggtcctctctcgtcagcgtatcgagtgtgccgatctaaacggacagaatcgtcgtaccctcgtgaccccggtccagcacccatacggtttaaccctgctgggatcccacatctactggaccgactggcagagccgcagcatccagcgagctgacaagaacactgggaccaacaccatcacagtacgagccaacctgccaggcctaatggacatccaagctgtggacagggagaggccactgggttttaataagtgtggcaggaggaatggaggctgtactcacctgtgcctgcctcgtcccaatgggacatcctgtgcctgtcccactggcatcctgctcaagggagacggcaggtcatgtgacgactccccagagtcctacctgctcttctccaaccgtgtcagtgttcgcagaatctccttggacaccaatgaccacaccgatgtgcatgtggctgtgcccgagctgcataacgtcatctcactggactatgacagcgtggacggaaaactttactacactgatgtcaccctggatgtcataaggcgtgccaacctggacggcagtggcatggagacggtgatcagccaaggcctgaagaccacagatgggctggctgtcgactgggtggccagaaacatgtactggacggacaccgggcgcaacaccattgaggtggcccgcttggatggaacgagtcgcaaagtccttgtcaataacagtttggatgaaccacgagccatcgcagtgtttccgagcaaagggttcctgttctggaccgactggggtcacattgcaaagattgagcgatctcacctggatggctcggaccgaaaggttctgatcaacaccgacctgggctggcccaacggcctcaccttagactacgatacacgaaggatcttttgggtggacgcccacttggacagaattgagagttcagacctgaacgggaaactgcgtcagatccttgtcagccccgtgtcccacccgttcgccctcacacagcaagaccgctggatctactggacggactggcagactaagtccattcagcgggtggacaaacacaccggccgtaacaaggaaactgtgctggccaacgtggagggcctcatggacattatagtggtatcccctcacagacagaccggtaccaacctctgtggggtaaataatggtggctgcactcacctctgcttcgccaagaccaacagttttgtgtgcgcctgccctgatgaaccagacaggcgaccctgctccaccagccaaacgcttttagaactatctctggacttggcattgaaatttggtaagataacaaacagctgtatatttccacaaacaaatgagtcattattatctgtgccatgtgttgaaggagaaggacttcatatcagctatgtgattggcggagtcctgaccatcctggcaattctaatcctcatcgctgcattgattatttacagacataaaaagtcaaagtttgccgacccaggagtgagcaacctgacctacagtaacccctcgtatcggacgtccacacaagaggtcaagatcgaggcatcacagaagcctccaatatacaaccagctccgatataagaaagagggtggagtggacggaggctacaccaaggagaagatccgcattgtggagggtgtgtgtctcctgtccaatgaggagctttactgggatgaccttaaacagatcaagccgtctcgaggcggactgcacacctgcatgcgtacggacaccgtgtccctgcaggccagcagtgcttcgctagacgatggtgaaacggagcagctcctccaggaggaggcgtccgaatgctcctctataaccaccctgaccccttcagccatcaccccgcagcgtcatgcccagcacagcctgcccgacaccggctgggcctccacgcgcaagccctccaccgagagcgaagtgtgagggaggccccctgccctccgtactttatctcaacctccattacctgatacacacctgtatttatcaccggtacaaacacacaaagagaaataggtacaaacacagcaacagttgcattcatagagtaatggtacatatgaacctggttagacgcaacaaagctactataaacacaactcctatatctcaactgaggctccgtcctacttgtgtacacacacacacacacgcgcagtacagtcctccaacactaccttcagcgctactgcctttaggcaaaatcataaactaatgagcatgctggaataagaaagcaaaggactctggggaggaagtgaacagagagacacaagcgttatctggagcctttttaaaggatgcagactctaaattcaacaaacgcttctctgtacaacttcaactttattttttgtgaacttttttttgtgttggacgaagcttaaacgacatactccctggacaacgtaaccacagcactctctctaatgccactcatgtctttatgaactctatttatgaacgtttttgtacttgtggagtgggtttgctgactttcagagaatggtgagagtgttgtgtttgaactttgcgcagcaggacccaggttttcaagagttgtatttatgacagtgccaaagggtggggcttcacagagtctccatgcttctttctgcatttacacttcaatagaattgtatcttaattacaggatgtttgtttcgactttaatgacttgccctcactggttgaagacctcaatgatgacaccaccggcttgtgattccttattttacagcctccaataggtcaagccaggacttactgtagtccattcatcgtttcgttttttttttttttattgtaagtcaaccattgctgattctctggcatagcagaggaagccacgatgaagtaatagcctaagtgccaaacatgttgttctttttgctcctttcagctgtatatttatttttctcagaggttttaaaaatgttcatgacattcgttttacttgggtttggtcacccaaatcacagaaaagcatattttctcagacatgtaccactagggctattcagccatgcagatagttgtggttctatttgcccagggtatggatatatgtctctgggatttcttctgccccaaaatactgggggttttccttggaatggctccctccatccaatctgtcactgagtgtctctttcattgttcctgggctttactatccaggggaataattatctaccacagcacttactttaccgaatttgaagctgtttgatttcaacaacaattcatattttactagtgaaaatcaaacagctttcttgcatctacttcagtgtaggattttgtgtattattcagtgtcatccccaatgttccccttccattgatacccacccacattttgtactgatatgtttccaaattcttatccgtaatctcagctgtctaaaaaaatggatacgccattttgtccatctgtccattctcatacttggcttaaggggaaattatttttttagaaataaaaaaaaatggaagcactgctagaaaca
>ENSSAUG00010005676|capn5a
ggtgatggcggttccgtacgagggtcagtcgttctctgctctgaggagacagtgtcagcagaatggacatctgtttgaagaccctctgttcccgacgaccgaccagtctctgttctaccagagcaaccgcatcggcagagtcacctggaagagaccgaaggagttgtgcagcgaccctcatctgtttgtggacggcatcagtgcccacgacctgcaccagggccagctgggaaactgctggttcgtagccgcctgctccagtctggcctccagagaggcgctatggcagaaggtgattccagactggaaggaccaggagtgggataaagaaaagccagagtcctacgccgggatcttccacttccggttctggcggttcggtgagtgggtggacgtggtgatcgacgaccggctgccgacggcgaatggagagctgatttactgccactccaacgacagcaacgagttctggagcgcactggtggagaaggcctacgtcaagatgtgcggatgctacgaggcgctggatggaggcaacacggccgacgctctcgtagatttcaccggtggtgtgtcggagccaatggacttgacggagaacgggttcaaagacgatgaagagaaacgcaacgagctgtttgagagagtcctgaaggtccacgacagaggaggcctcatcagctgctcgatccgggcgaccagtgcggcggacatggaggccaggctggagtgcggcctggtgaagggccacgcctacgcggtgacagacgtccgcagggtgaggctgggacacggcctgctggcttacttcaagtcagacaaactcaccatgatccgcatgagaaacccctggggacagaaagagtggaacggaccctggaaacgagatggagaaggagagatgacgtttgacgacttcatcgttcacttcacagatctcatcctgtgtcgtctcatcaacacgtcctacctgagtttccataagacctgggaggaggccgtgatgcgcggctcctggcgccgcaacgacgacccgcttctcaaccgagccgggggctgcatcaacaacaagcactccttcctccagaacccacagttcatgtttgacgtgaagaaagcggaggatgaggtgctgatctgtctgcagcagaaagaccgcagagccacgctgagaggaggacgaggagaaaacttggctattggcttcgacatacacagggtggagttcaacaggatctaccgtatgcatgtcacccagcagaaggttgctgggagcacctacatcaactcgagatctgtgttcgtacggaccgacctgccacagggccgctacgtcatcatacccacgaccttcgaccccggcctggagggagaattcctgctgcgcatcttcacagacgtgcccgccgactgcaaggagttgactcttgatgagcctccacagacctgctggtccgggttgtgtggttatccctctctggtcactcaggtccatgttctgcaggctaacggactcgcaggacaagactcggatggagcttcagacccctacgtgataatccgatgtgaaggagagaaggttcgctctccggtctatgaaaacacacgcagccccgccttcaacaccaaggggctcttctacaggaagaaagccaaccagccaatcagcattgagatctacaaccacaacgtgctgaaggattccttcatgggtcaggtgacgttgccgggggaacaaggtgaataccagcagacgcttcacctgagggacaagggtgatcgccgtgacaacgacctcccgggaaccatcaccgtcaccatagtcactagcacggtgcttaccaacatctgagaccaacctggtaaaccgtccaatcagctgtcagatctgtcgctctttcctttaacacacagtatgtcatttctgccactcgtggtctctcaatcagtctcccaatgttaaaagacagagtttgatgccgacgcaaagttgtgtgggatcattggagttgttgttgacttccacttcctcactctgtgatgtttacacagcagttacagcagctgcaggaggagatacgacaggcatccaaattaccgttaacttgcataacattacagatttctctggtttgaacattgttgtgaatgtttgggataataccaaaacacagctcagaaatatttaacaaggtcttgttgtttttagacattttaatgcatgttatgttagatgcctttaaagtttaccaaattacctttttgccacaacttttggctgcaagtgtaaatatttgtcaggaatagagggtttagttttgaaagtttacttcatgaagtaagaagaacacaagaaacctgattctgtgttttaatttgatgcccataaatgtctgtttacatgatgatttaaagtgcctgaatgggggttatttgaatatcctgaaaatatgtcagagagagaaatttctaatgatttttagccagcttataaatattgtttacagttctttaggtaagctaatgttatgtctctcaaccactactttgtataattgttattccactatttaatctgttttactgtatttcctcaaacaaaaaccgagagtcaaataatatccagggatgttgtcgacaggaataaacaaaggccg
>ENSSAUG00010004401|lrp4
cgcaacaaacaatggaaaaagtcacatggtgctgagtgttcgtgcgggaggaaccacttcacatgtgcggtcagtgcgtttggggagtgtacctgcatcccggcccagtggcagtgtgatggagataatgactgtggggaccacagcgacgaggatggttgcatgcttcccacctgctcgccgctagacttccactgcgacaacggcaaatgtatccgtcgctcctgggtgtgtgacggcgacaacgactgcgaggacgactcagacgagcaggactgccctcccagggagtgcgaggaggatgagtttcactgccagaatggctactgtattcgcagcctctggcactgtgatggagacaacgattgtggcgacaacagtgatgaacagtgcgacatgcgcaaatgttcggacaaggagttccgctgcactgatggcagttgcattgctgagcactggtactgtgacggagacacggactgcaaggacggatcagatgaggaaaactgtccctcagatgtgatggcagccacctgcagtgtggaggagttccagtgtgcatacggccgctgtatcctggacatctaccactgtgacggagacgacgactgtggggactggtcagacgagtcggactgctcttcccaccagccgtgcagatcagttgaattcatgtgcagcagcgggatgtgcatcaacgccggctggaggtgtgacggcgaatacgactgtgacgaccaatcagacgagaagaactgcaccacgtccatgtgcacggccgaacagttccgctgtggaaccggacgctgcgtccggttgtcatggagatgtgatggtgaggacgactgctccgaccacagcgatgaagagggctgtgagaaaactgagagtcctccatgtgctcctgatcagttccaatgtgggaatggccgctgtatcggtcagaggaaggtgtgtaacgaggtcaacgactgcggagacgggactgacgaacacccacaccatgactgccgtccgcgctccagcgagggcaactgcaaccagaataacggaggctgctcccagaagtgtcagatggtcagaggactggtccagtgcacctgtcacactggatacagactgatggacgacggcaaagcctgccaggatgtggacgagtgtgctgaagaaggctactgcagccagggctgtaccaacacggagggggggttccagtgctggtgcgttcagggctacgagctccgacctgacaagcgcagctgcaaagctctgggtccagagccagtgctgctgtttgccaaccgtatcgacatccgtcaggttttaccgcatcgctccgaatacaccctgctgctcaacaacctggaaaatgccatcgctctggacttccaccacagcctagagttagtcttctggtcggatgtgacgctggaccgtatcatgaaggccaacctcaacggctccaatgtagaggaggttgtgtccaccggtctggagagcccaggtggactggccatagactggatccatgacaaattgtactggacggactctgggacatctcgtatcgaggtggcaaacctggatgggacacatcgcaaggtgctgctgtggcagaacatggagaagccccgagccattgcactgcaccccatagagggtaagatctactggacagattggggcaacacacctcgcatcgagtatgccaacatggacggctccaacaggcgggtcatcgcagacacacacctgttctggcccaacggcctcaccatcgattacgccggtcgcagaatgtactgggtggatgccaagcaccatgtcatcgagagagccgacctggatggacgcaaccgcaaggccgtcatcagccacggcctgccacacccgtttgccatcacagtgtttgaggacagcctctactggaccgactggcacaccaagagcatcaacagtgctaataaattcactggcaagaaccaggagattatccgcaacaagctgcacttccccatggacatacacaccctgcacccccagaggcagcctgcaggttggaaccgctgtggcaccaacaacggaggctgcagccacctgtgtcttcccagcaacaagacgttcacctgtgcctgtcccaccggcttcaagaaggtggaccacttcaactgtgctgacggtcttgacaagttcctgctttttgcccgaaggacggacatccgacgagtcagcttcgacacagaggacatgtccgatgatgtcatccctctggctgacgtgcgcaatgccgttgcgctggactgggatgccaaagacggctacatctactggacagatgtcaccactgactccatcaacagagcactgtggagcggcgccaagcaggaggtggtggtggacaccagtttggaaagcccagcaggtttggcaattgactgggtgaccagcaagctctactggaccgatgctggtacggatcgtatcgaagtttctaatgccgatggcagcatgaggactgtcctgatatgggagaacctggaccggcccagggacattgttgtcgacccgatcggaggtttcatgtactggaccgactggggtgctaacccaaagattgagcgagctggaatggacgcctccagtcgtattgtcatcatctcatccaatctgacgtggccaaatgggctcgccattgactacgagaccaaacgcctttactgggccgatgctggcatgaagaccattgaattcggcaactttgatggttctgaccgacaggttttaattggcagccagctacctcacccctttggcctgactgtacatgaggacaagctgtactggacagactggcagtcaaagagcatccagagtgctgacaagctcactggcctgggccgacacacactggctgaaaacctggagaatctcatggacattcacatgttccaccgactacgtgagacagtgcataacccgtgtttggtgaataatggaggctgcagccacctgtgtctcctggctcctgctcccaaagcctccagctgtgcatgtcccaccgggatcaacctgcagactgatggaaagacctgcacgcctgggatgagcagcttcctggtctttgcacggaggacagacatcaggatggtttctttggatatcccctattttgctgacgttgttctggccgtcaatagctcaatgaaaaacaccattgccattggggtcgaccccaaagaaggaaaagtctattggtctgacagcacgctgaagaaaatcagcagagccagcattgacggaaaagcacatgaagacatcatatctacaggcttaatgacaactgatggcctggcggtggatgccgttggcaggaagatctactggacagacaccggaaccaatcgcattgaggtggctaacctggacggctccatgaggaaagtcctcgtctggcaaaacctggacagccctcgggccatcgccctctaccacgagatgggttatttatactggacggactggggagagcatgctaagctggagcgctcatcgatggatggatcagatcgtgtggtcctcatcagcaacaacctgggatggcccaacggcctggccatagacatggccggctcacagttactgtgggccgatgctcacactgaggttatccttcttttcagaagaactcacccatacggtttaaccctgctgggatcccacatctactggaccgactggcagagccgcagcatccagcgagctgacaagaacactgggaccaacaccatcacagtacgagccaacctgccaggcctaatggacatccaagctgtggacagggagaggccactgggttttaataagtgtggcaggaggaatggaggctgtactcacctgtgcctgcctcgtcccaatgggacatcctgtgcctgtcccactggcatcctgctcaagggagacggcaggtcatgtgacgactccccagagtcctacctgctcttctccaaccgtgtcagtgttcgcagaatctccttggacaccaatgaccacaccgatgtgcatgtggctgtgcccgagctgcataacgtcatctcactggactatgacagcgtggacggaaaactttactacactgatgtcaccctggatgtcataaggcgtgccaacctggacggcagtggcatggagacggtgatcagccaaggcctgaagaccacagatgggctggctgtcgactgggtggccagaaacatgtactggacggacaccgggcgcaacaccattgaggtggcccgcttggatggaacgagtcgcaaagtccttgtcaataacagtttggatgaaccacgagccatcgcagtgtttccgagcaaagggttcctgttctggaccgactggggtcacattgcaaagattgagcgatctcacctggatggctcggaccgaaaggttctgatcaacaccgacctgggctggcccaacggcctcaccttagactacgatacacgaaggatcttttgggtggacgcccacttggacagaattgagagttcagacctgaacgggaaactgcgtcagatccttgtcagccccgtgtcccacccgttcgccctcacacagcaagaccgctggatctactggacggactggcagactaagtccattcagcgggtggacaaacacaccggccgtaacaaggaaactgtgctggccaacgtggagggcctcatggacattatagtggtatcccctcacagacagaccggtaccaacctctgtggggtaaataatggtggctgcactcacctctgcttcgccaagaccaacagttttgtgtgcgcctgccctgatgaaccagacaggcgaccctgctccaccatttcaggttacgtccccactgctcctacaagaggaaccagcagcactccagtccccaacaagatccccaaagctccaacagacactccacacagaggaccctcactggtcaagtactcattattatctgtgccatgtgttgaaggagaaggacttcatatcagctatgtgattggcggagtcctgaccatcctggcaattctaatcctcatcgctgcattgattatttacagacataaaaagtcaaagtttgccgacccaggagtgagcaacctgacctacagtaacccctcgtatcggacgtccacacaagaggtcaagatcgaggcatcacagaagcctccaatatacaaccagctccgatataagaaagagggtggagtggacggaggctacaccaaggagaagatccgcattgtggagggtgtgtgtctcctgtccaatgaggagctttactgggatgaccttaaacagatcaagccgtctcgaggcggactgcacacctgcatgcgtacggacaccgtgtccctgcaggccagcagtgcttcgctagacgatggtgaaacggagcagctcctccaggaggaggcgtccgaatgctcctctataaccaccctgaccccttcagccatcaccccgcagcgtcatgcccagcacagcctgcccgacaccggctgggcctccacgcgcaagccctccaccgagagcgaagtgtgagggaggccccctgccctccgtactttatctcaacctccattacctgatacacacctgtatttatcaccggtacaaacacacaaagagaaataggtacaaacacagcaacagttgcattcatagagtaatggtacatatgaacctggttagacgcaacaaagctactataaacacaactcctatatctcaactgaggctccgtcctacttgtgtacacacacacacacacgcgcagtacagtcctccaacactaccttcagcgctactgcctttaggcaaaatcataaactaatgagcatgctggaataagaaagcaaaggactctggggaggaagtgaacagagagacacaagcgttatctggagcctttttaaaggatgcagactctaaattcaacaaacgcttctctgtacaacttcaactttattttttgtgaacttttttttgtgttggacgaagcttaaacgacatactccctggacaacgtaaccacagcactctctctaatgccactcatgtctttatgaactctatttatgaacgtttttgtacttgtggagtgggtttgctgactttcagagaatggtgagagtgttgtgtttgaactttgcgcagcaggacccaggttttcaagagttgtatttatgacagtgccaaagggtggggcttcacagagtctccatgcttctttctgcatttacacttcaatagaattgtatcttaattacaggatgtttgtttcgactttaatgacttgccctcactggttgaagacctcaatgatgacaccaccggcttgtgattccttattttacagcctccaataggtcaagccaggacttactgtagtccattcatcgtttcgttttttttttttttattgtaagtcaaccattgctgattctctggcatagcagaggaagccacgatgaagtaatagcctaagtgccaaacatgttgttctttttgctcctttcagctgtatatttatttttctcagaggttttaaaaatgttcatgacattcgttttacttgggtttggtcacccaaatcacagaaaagcatattttctcagacatgtaccactagggctattcagccatgcagatagttgtggttctatttgcccagggtatggatatatgtctctgggatttcttctgccccaaaatactgggggttttccttggaatggctccctccatccaatctgtcactgagtgtctctttcattgttcctgggctttactatccaggggaataattatctaccacagcacttactttaccgaatttgaagctgtttgatttcaacaacaattcatattttactagtgaaaatcaaacagctttcttgcatctacttcagtgtaggattttgtgtattattcagtgtcatccccaatgttccccttccattgatacccacccacattttgtactgatatgtttccaaattcttatccgtaatctcagctgtctaaaaaaatggatacgccattttgtccatctgtccattctcatacttggcttaaggggaaattatttttttagaaataaaaaaaaatggaagcactgctagaaaca
>ENSSAUG00010007525|wnt5b
tccttcatgttacatcaatgaaaatcaaatcaccgaggatcttcggtctccagagggaatgtccttgaataacccaaccaagccgtgactctgactttcccgctctttatactgctgcattagagggatcgtttcaagacgtgatgctagaggggttcttacagcatcaaactgctgtatttgacacatcggaaaaacaccacagttcattaagttgatattcaaagtatactgctaatcagataaactagctgacttgaaaaacatataatcaccaatttcatgctctatctctctacagggtttcatgtacggaaacttacaacacttcaaatctgtgctcttaggcaagactttcacagctgaaataccattaactgatgatctttataccactaaaacataatcctcggagcactttccccagcagcaccggctgtgtggcgctgacgcggcggaccatggacaacaggcctgtccggaggaggcgacccggagccgtgcgacatctgctgctggcggccgccttcctcgcctgcagctcccagctgctggtggtggatgccaactcatggtggtcgctcgctctgacccccatccagcggccagagatgtacatcatcggagctcagcctctctgcagtcagctgtctggtctctctcagggccagaggaagctgtgccagctgtaccaggaccacatgatctacatcggagacggagccaagacgggcatcaaggagtgccagtaccagttcaggcagaggaggtggaactgcagcaccgtggataacacgtctgtgtttggacgggtcatgcagattggctccagggaaacagccttcacctactccatcagcgcggccggggtggtcaacgccatcagcagggcgtgccgcgaaggcgagctctccacctgtggctgtagccgttccgcccgaccccgcgacttgccgcgcgactggctgtggggcggctgtggcgacaacgtgcactacggctacaggttcgcacgggagttcgttgacgccagggagagggagaagaattacccgaagggttctatcgagcacgcccggacactcatgaacctgcagaataatgaagcggggagacaggcggtctacaaccttgcgaatgtggcctgtaagtgtcacggcgtctcgggttcctgcagcctgaagacatgttggctccaactggccgacttcaggcgtgttggggagttcctgaaggagaagtacgacagcgcggccgccatgcgcattggacgcaagggcaagctggagctggtcgacaagcgcttcaacaccccgaccccggaggatctggtttacatcgacccgagccccgactactgcctccgcaacgagaccacgggctctctgggcacgcagggccgcctgtgcaacaaaacctcggagggcatggacggctgcgagctcatgtgctgcggccggggatacgaccagttcaagacctacaagcacgagcgctgccactgcaagttccactggtgctgctacgtcaagtgcaagcgctgcacgacgctcgtggaccagtttgtgtgtaaatagcactggaaaggaggagaaggagcggagataaagggggagggtgaaggatagaagacagacaggagggtgaattttcagggttttgttcaggataagtaaagatacacaggttcgatttttttccttctctcttttatcaacacctgcgtggccattttttaagcacaatagtgtagtgatagactggcagggaacaagaaacagatgtgggaggaaggaagaattcgaccgtgctctttggacaacaatttattcaacggagattcctttttctcactattgtcatcgtcacatcccgtccggtggaacatcctgatcacaaccctgagagaggaggaggaatggggaggcgatcaaaaaaggacatcgaggataaacggacctagaaaaatggaacaactggatcctgaaaagagggacacatacaaccagtgtgatgaaaaatatgagatgaaataaatatataattaagtaataaataaatgtaca
>ENSSAUG00010005337|cast
atggcgtatgcagcatactggaacagccttaaaggtggagcagctgcttcccagcctgaagtccatcacggcagcaggttctcagcctacgacccttctgcacggtcctgctatggcaagtcgcagcctagccaggccacacccaaaccagccgctcaggtctccaccgtgaagcctgctcagtacgagaaggcttcatcaggatccgccatggctacaaagcctggggtggtttccacagcgacaggtggagccacaggaagtggcgtcaaagcaggaggaagtgcttcaattgggactgcaggaaaagagtcacctaaagccaaaacagagactccaccaactgtctctcaaggtaaggccgcagctacagttccctctgctgctgctggagcggctgcagcagctggtgtggcggcgaccacacctaaagagtcacccaaaggcccagccaaggtgcaggtggaggttcctcccacggcagccaaaggagcaaaagagcctgctgtccctgccgatgtcaaaccgaaggacgtccctaaaccactgagcacagacgaggccctggattctctttcagctggtttcatgtcttctaccactccagctgcaggcatgcagccagagaaaaagggccacgtcgacgttgtcagcgcctcatctgccggccctgctaacttcgcaccacctcctgtgcagaaatctcaaacctctgccgcagctcctcctgctgataaaaaagccaggatggagaaagcttctgatgatgtctctcagaaggctgggcgcccctctgctccttccaagagcgcaatgcctcaggacgctctcagtgctctcgttgactcgttgccagcagacataccaaaacctgaaccccccaaactcagacctgaggacatggtctcggagggtaaacacaagaaggagaagggtgttcttgtaggagagagggacgatacaattcatccgaactacaggtttgatgaggagaaactcaaaaaactgcctgctcccaaacctgagcccaaaatagccactagtgatgctctggactttttgtctgaaggcttcctggactcctcagtggctcctgtacagaaagcccctcctgttgctgtgtgtcctgctcctgctgataaaaaagccaagatggagaaagtcggtgatgatttctctctggaggccggactctctgcttcgacggccaagaaagtggaatcctgtgccgtcccccctgtggctgtgtgtctctctcctgctgatcaaaaagccaaagcagggaaaagtgctgccggaaaggacagcactgacggcaagctcaagaccgatctgggaaacatgcctctggacgctctcagtgctcttggtgactcgttggcagcagacaccccaagacctgaactccccgaagtcaaacctgaggacatggtctcggagggtaaacacaagaaggagaagggtgttcttgtaggagagagggacgatacaattcatccaaactacaggtttgatgaggagaaactcaaaaaactgcctgctcccaaacctgagcccaccttggcccccggcgaggctctggactttttgtctggagacctgatgacctcctcagcagctccctctgtccaggctcccgttgtcaccccctcagctcctcctgcacagaccaaagtagaggatttgtcagctctggatttactttcggacgattttgtggctccaaccaaagcttcaggagtccaggcccctgtccctccttctaccaagaagaagacaccagagaaaacggtttgtcccagctcagttgatgtcgctcctgcaaaacccaagactgacgactctttgtctctggacgctctcagtgctctcggtgacacactggcagcagacacaccaagacctgagctccccgaagtcaaacctgaggacatggtctcggagggcaaattcaaggaggagaagggtgttcttgtgggagagagggaggacacacttcctccagagtacaggtttgataaggacaaactccaaaagctgcctgctcccaaacccaagcccaccattggtactggagacgctctggactttttgtctggagacctgatgacctcctcagcagctcctgctgtccaggctcccgttgtcaccccctcggctcctcctgcacaggcctctgatgacttcgccctggatgccttggcaggagactttgtttccaccgctgctgctccagtagttaagtctggttttgctcccccaaagactgcccggcagctgtcagggggaacagacagcgccctggacgctttgtcagacaccttgaaggatatcacacccgcaccccagcccgccccggtcccgagtaaagacttcgtcaaggagaaaaagattgttgaagagaagctgataaagatgggagagagagacgactcgctgccgccagagtttcgacccacagaggaagagcgtaagaaaattgaagaatcaaagaaaaaggcagccgcagcacccaagcagaagtctatggatgataaaacagccttggacctgcttgccggtgatttcgaaactgctccaaagcccgctgcagctgccacatcgtgtgcagccgcgacaaagctggaacctcctgtgctggactcagatcccctgaagccaatggccggtcctgtcctggacaacctggcaagcacgctgctcccagaggcggtcaaaacaaagacagacaaaccaaagggcaagaacaagtcaaagtccaggtctaaaaaacaccacgcagaggagccatctgccaccgacctgctagcaggtcagctcagctcagacgtcgtgccaacatctacaaagaagggaggcaagagctagaccacttggtcggcggtgtaattcgtcctcccggccacaggggcgtgtcagcgagggggagcagctcgatggcgacgattctatttttctaaattgtcaagaatgtacagtttatgtgctggatgagagatgaacttaagacacacccatatcacttgctcgacacacacagacacacacagacacatacacacacggagctctgcctgcggcgcctttcttgctcggtttcgcctgtatttaaggatgagaggcttgtggtgtcaatgagatattttttttttttttaaactagatggagaatgagaaggggaagtgtgcagggacatagaggaattgaagacaagtgaaaatgttaaggttttttttctggttggtgtgatgagcttgccgaaggaagaaaggcgctgctcgtcagagtcctgcgcgcacatctcagctgacggtttccatggctcaagcgccactgatgtcacgcctcactgctcctgtgagctgtgacattggtcagcgcagcggtgactgtcagctggcctgggagcagtgaggagtgggtgtatagtatcgggatgtttgtgcaatcttgatgtacacagaaaaaaagccaagttttcttcttttttttttatcacgatgtggtcagacgccttaaggacactagtgtacagcttagtttgcttgtatttttggacaacacatagtttacatgatatctggaggattttccaggaggtgatctgcttaaatccgtattcgagagcttctcgcaaatgcctttaactttctggagagaactgtatgtcatgaggagggtctgtatgtatttggctgtgtagagaaaaaaaaaagaaatgctggcgtccaaaagtgcacttagtgagctgaggtggttacaagctttggaaactgcctttatttgtatactgtacacataaataaaaaaataaaaaaagattttttttgctctaca
>ENSSAUG00010007812|lrp1ab
atgtcggcaacttgcagctctaagcagtttgtatgtaaggaccaggtgacctgtatctccaaaggctggcgctgcgacggggagaaggactgcccagatggctcggacgaatcgccagatatctgctcacacaacagggtgaaccagtgtcctgtcaatgaagctgggtgcctggatccggatgtgtgtatccacatgagcaaaatgtgcgatggagtacccgactgcaccgatggctgggatgaagggcctcactgcagagatggagcaccaggctgtgcctcccatgggtgcgagtttcactgtgctgtgacgcatgacggacctcagtgctactgtagcaacggctatgaggtcgctgcagatggaaagatatgtaaagatttcaacgagtgcaatgtgtacgggacatgcagccagacgtgcacaaacacagagggctcctacacctgcagctgtgtggagggctacctgctgcagccagacaatcgctcctgcaaagccaaaaatgagccggtggaccgtctgcctatgttgttgatcgctaacctccatgacatccgctgcacctccctgagcggctccacatcccggctgccctccatcgccactaagcagaccatggctatggacttcatctacgccgaggaaactgtctgctggatagatgtgggagaaacccctgccgcaacacacctgaagtgcgccagcatcccagacctcaagactgtcactaacatccgcaccattaacatctccctcagcctgcaccatgtggagcagatggctatcgactggctgaccggaaacttctactttgtggatgacgtggacgaccgggtgtttgtctgcaacaagaacggccagacatgcgtgaccctgctggaccaggagctgtacaaccctaaaggcatcgctttggacccagccatgggcaaagtgttcttcacagactatgggtcaacaccaagggtggagcgctgtgacatggatggtcagaaccgcactaagctggtggacagcaagattgtcttcccccatggtatcacactggacctggtcaaccgcatggtgtactgggctgacgcctacctggactacattgaggtggttgactatgagggcaagaaccgacacaccatcatccagggcctgctgattgagcacctgtacgggctgactgtattcgagaactatttgtatgccaccaactcagacgaaggcaacctcaaccccaagaccagcgtgatccgagtgaaccgcttcaacagctctgacttccatgtggtgacgcgggtggatcggggagcagcgctgcacgtgtaccaccagaggcgccaacctcaagtacgcagccatgcttgtgccctggatcagtttgggaaggccgggggttgctctgatatctgtctgctgagcaacagccacaagacccgaacttgccgctgtcgctctggattcagcctcggcagcgacggcaagtcctgcaagaaaccagaccatgagttgttcttagtgtacggtaagggtcgccccggtatcatcaggggcatggacatgaacgccaaggtgcctgatgagtacatgattcccattgagaacttaatgaacccccgagctctggatttccatgctgcaagtgagttcatctactttgctgatgccaccagctacatcattggccgacagaagatagatggcacagagagagacaccatactgaaggaaggtattcacacagtggaggggatagccgtagactggatgggaggtaatctctactggacagatgatgggcctaagaagactatcagtgtggccaggctggagaaagcttctcagacccgcaagactctcattgagggcaagatgagccacccgcgtgcaattgtggtggacccgcagcatgggtggatgtactggactgactgggaggaggaccccacagagagcaacagagggaagatcaagaaagcttggatggatggttcccatcatcaagtgttcctgaccagtaagacggtcctttggccgaatggtttgagtctggacattccccaaggtatcctgtactgggtggatgcttactacgaccgtattgagttggtttacctcaacaccacagagcgaaaggtggtgtatgaggggcaggagcttaaccacgcctttggattatgccattacaagcaatttctcttttggaatgaataccggggcggcagcatctacaaactggaccatgtcaccaagacggtcacgctcctccgcaacgagaggccgcctatctttgagatcagagtgtatgatgcacaccagcagcaaggctccaatgtgtgtcgagttaacaatggcggctgcagcagtctgtgcctcgctattccggacggcaggtcctgtggctgcgctgacgatcaaatcctggatgtcgataatgtcacctgcaaagccaacccctcctacgtgcccccgccccagtgccagcccggggagtatgcctgcaagaacaaccgctgcatccaagagcgctggaagtgtgacggagacaacgattgtctggacaacagcgacgagggccctgagctctgccaccaacacacctgcccagctgaccgattcaaatgccagaacaaccgttgcatccccctgcgatggctgtgtgacggcgacaatgattgtggcaacgatgaagatgaatccaacaccacctgctctgctcgcacctgcccaccaaaccagtacccttgtgccagtgggcgctgcatccccatctcctggacatgtgacctggatgacgactgtggagatcgctcagatgaaccagactcctgtgcctaccccacctgcttccctctgacccagttcacctgtgccaatggccgctgcatcaacatcaactggcgctgtgataacgataatgactgtggggacaacagtgatgaagccggctgcagccattcctgctccagcgtccagtttaaatgtaacagtggccgctgcatcccagaatactggacctgtgacggcgacaatgactgtggagactacagcgatgagactcacgccaactgtaccaaccaggctacccgtccaccaggcggctgccatgtagatgagttccagtgtcggatggacggcctgtgcattccgatgcgctggcgatgcgacggtgacacagactgtatggacctgagtgatgagagcaactgcgagggtgtgacccacatgtgtgacccagcagtcaaattcagctgcagggactctgctcgctgcatcagcaaggcctgggtttgtgatggcgacagtgactgtgaggacaattcggatgaggacaactgcgaggcgttggtgtgcaagttgtctcaccacatgtgcgccaccaacgactccatctgtctgcctactgagaagctgtgtgatggcaccgatgattgtccggatggctctgatgagaaactttgcgacttgtgtgcattagacaacggtggctgtagccacaactgcagcatcatacctggggagggcttcatgtgctcttgtcccctcggcatggagctgggagctgacaacaagacttgccagatccagagcttctgtgccaaacatctcaagtgtagccagaagtgcgaacaggagaaatccagcgtcaagtgctcttgctatgagggctgggagctggagtctgacatggagagttgcaaaagcactgatcccttcaagccgttcatcatcttctccaaccggcatgagatcaggaggattgagcttcacaagggggagttcagtgtgctggtgccaggcctgaggaacaccatcgccctggacttccacctcaacgagagcacgctgtactggaccgatgtcgtggaggacaagatctaccgtgggaaactgtctgataatggagccctgaccagtttcgaggtggtgatccagtatggactggctaccccagagggcctggctgtggactggatagcaggaaacatctactgggtggagagcaatctggaccagatcgaagtggccaaactggatgggaccatgagaaccaccctactggctggtgaggtggagcaccccagagccatcgccctagaccctcgagatgggattctgttttggacagactgggatgccagtctgcctcggattgaggcagcatctatgagcggtgaaggcagacgcaccatccacagagagacgggcagcggtggctggcccaatgggctcactgtggactacatggaaaggcgcattgtctggattgatgccaggtcggatgcaatctactccgctatgtacgacggctccgggctgattgaagtgttgcggggtcatgagtatctgtcccaccctttcgctgtcaccatgtatggaggcgaggtctactggactgactggaggactaacacgctggctaaagccaacaaatggactggacacaacgtcaccgtagtccagcgcaccaacacacaaccctttgacttgcaggtctatcacccgtccagacaaccccaggctccaaacccgtgtgccaccagcgatggtaagagcccttgctctcacctctgtcttatcaacttcaaccagaccttctcctgcgcctgccctcacctcatgaagctgcagcctgacaaacgcacttgcaaagagtcccgcaagttccttctatacgcccgtcagattgagatccgtggtgtagacattgacaacccctactacaactacatcatctcctttaccgtgccggacatagacaacgtgacagtagtggactatgacgccgtggagcatcgcatctactggtcagacgtccgaacacagacaatcaagagagctttcattaacggcacaggggtggagacagttgtgtctgctgaccttcctaacgctcatgggctggcagtagactgggtgtccaggaacctcttctggaccagctatgataccaataagaagcagatcaatgtggccagactagacggatccttcaagaacgctgtcatccaaggcttagacaagccccactgtctggtgctgcatcctctactggggaagctgtactggactgacggtgacaacataagtatggctaacatggacggtagcaaccacaccacacttttcaccaatcaaaaaggaccagtaggcctctctattgactatgaaaatgagcagctgtactggataagctcaggaaacggcaccattaaccgctgtcagctggatggaacgaagccggagatcctggaaggtgttaaaggcaaacttaccaaggctacagcactggctataatgggagacaaactgtggtgggccgaccagggaactgaccagataggaacatgtgacaagaaggacggaggaaactggaaggttttgcgaaacaacacgtctcctatgatgcacatgaggatctatgatgaggacgtgcagaaagcgggtatcaacctttgcagtaacaacaatggagactgctcccagctgtgtctgcccacctctcatacaaccagggcctgcatgtgcactgctggatacagcctgaagacaggacagcagtcctgcgagggtatgggctccttcctgctgtactctgttcatgagggaatcagaggaattccactcgacccggcagacaaatctgacgccttggtgccagtgtctggcacctctctggccgtcggcatcgacttccacgctgagaatgacaccatctactgggtagacatgggtctgagcaccatcagcagggctaagagagaccagacatggagagaagatgtggttaccaatggcattggcagggtggagggcatcacagtcgactggatagcaggaaatatttactggactgatcagggctttgacgtgatcgaggtggccaggctgaatggctccttccgctatgttgtcatttcccagggcctggacaagcccagagccatcactgtccacccagttaaaggctatctgttctggactgagtggggtcagtaccctcgtattgagcgctctaggttggatggtacccagaggttggtcctcgtcaatgtgagcatcagttggcccaatggaatctccatcgactacgaggagggtctgctgtattggtgcgatgccaggacagacaagattgagcgcatcaacctggagactggagagaacagggagctggtgctggccaacaacaacatggacatgtttgctgtgtccgtttttgaggaatacatctactggagtgacaggactcatgccaacggctccattaagagaggcagcaaagacaacgctacagatgcactgcagctcaggactggcatcggtgtgcagctgaaagacatcaaggtgttcaacagggccaggcagcaaggcaccaacgtgtgcaaagacaacaacggtggctgtgaacagctgtgtcttttccgtggcaacactgatcgcacctgcgcctgtgctcacggcatgctggcagaggacaaccgcagctgtcgcgactacgatggatacctgctgtactcggagcgtaccatactgaagagcatccatctgtcagatgagactaacctcaacgcgccaataaagccgtttgaggacccggaccacatgaagaatgtcatcgccctcagctttgactatcacggtggtggaggcaagggagccaaccgcatcttcttcagtgacatccactttggcaacatccagcagatcaacgatgatggcacagaccgcaagattgtggtggacaatgtagggtcagttgagggcctggcatatcaccgcggttgggatacgctctactggaccagttacacaacctccaccatcactcgccacactgtggaccagagccgctctgtggcctataaccgcaacactgtggtcactatgtctggagaagaccaccccagagcctttgtgctggacgagtgtcaggacctcatgttctggaccaactggaacgagcaggctcccagcatcatgagggcctcgctgaatggagccaatgtgctcgtcatcatcggcttggacattaaaactcccaacggcttggcaatagatcaccgtgccgagaaactgtacttctctgacgccacactggacaagatcgaacgctgcgaatatgacgggagcagccgttatgtcttgttgaagaatgagccggtccatccgttcggcctggccgtgtatggagactacatcttctggactgactgggtgaggagggctgtcctgagagcggacaagtacaccggaggtgacatgaaagtgctgcgcgctgacatccctcagcagcccatgggcatcgtggctgtggctaatgacaccaacagctgtgagttttctccttgccggacaaataacggaggttgccaagacctgtgtctgcccacatctgatggacgggtcaactgcagttgccgtggagacagacaacttctggaagacagcacctgctcttcgctgaatatgtcgtgtggaagcgttgatgactttgagtgtgggaacggagactgtatcaactacagcctgacctgcgacggcatggcccactgcaaggacaagtctgatgagaagcagtcctattgtgcaaatcgaatttgtaagaaaggctacagacgctgtatgaatggccgctgcatcggccaccagttctggtgtgatggcacggatgactgtggtgaccactcagatgagctgccctgcaacatgaccctgtgcaaaccaggagagttccagtgtaaagatggcagctgtatctccaactacagccgctgtgaccaggtggtcaactgtgaggatgctggtgatgagatgaactgtcaacccaccgattgctctcgtttcttccgcctgggagtgaaaggagcttccttccagagctgtgagaaaacaactctgtgttatctgtcctcgtgggtttgtgacggcaacaacgactgtggagacttttcagatgagagaaactgcccagataaaaggaagctcaaatgtccagtcaacttctttgcttgtccgagtggtcgctgcattcctatgagctggacctgcgataaagagaacgactgtgagaacggagctgatgaaactcactgtgacaaattttgcacatccacccagtttgaatgtgggaaccaccgctgcatttcctcccactgggtgtgtgacggctccgatgactgtggtgatggttctgatgaggaccagaaatgcaaatccaagacctgcagtcctgaggctttccagtgtcccggctcccacatgtgtgtgcctcaacgctggaagtgtgatggagacaaggactgtcctgatggagctgatgagagtgtcaaggctggctgcatgtacaccaacagcacttgtgatgtggagaatgagttcatgtgccagaacagacagtgtatccccaagcactttgtgtgcgaccatgacatcgactgctccgacggttcagatgaatcccgagaatgtgaatacccgacatgtggtccagatgagttccgctgtgccaacggacgttgcctcaaccagaagaagtgggagtgtgacggagagtttgactgtcaggatcgctctgacgaggctcccaagaaccctcgttgcactgactcagtgccagaacctgcagtctgtgagattttgacatgtctcctgtgctcttggccccttcagtgcaggtgtcatcctggtttccagctgaagcgtgatgggaagacatgtgtggatatagacgagtgcacaactacctacccctgctctcagcgctgcatcaacacacacggcagcttccattgtctgtgcgtggatggctttgaactaagccccaacgaccccaccatctgcaagtccacatcggaagaggagccctacctgatcttcgctaaccggtactacctgagaaaactcaacctggatggatccaactacactctgataaaacagggcctgaataatgcggtggcattggacttccactatgcagagcagatgatctactggacagatgtgaccactcagggcagcatgatccgacgcatgcatatgaacggcagcaacatggaggttttgcaccggacatccctgagcaacccagatggcctggcagtggattgggttggcgggaacttgtactggtgtgacaaaggccgggacaccattgaggtgtcaaaactcaatggcgcctaccggactgtgttggtaaacagcggcctgagggaacctcgtgctgtggccctggatgtccgctatgggtacctgtactggtccgactggggcgacaaccctcacattgggagaatcgggatggacggcaccaacagaagcgtcatcgtagaggataagatcacgtggcccaatggattaaccctggacttcatcaatgaccgtatatactgggctgatgccagggaggactacattgagtttgccagcctggatggcaccaacagacacacagttctcagccaggacatcccccacatctttgccatgactctgtttgaggagtacatctactggaccgactgggagacaaagtccatcaacagagctcataaaagtcttggcaccaataagtccaccctgatcagcaccctgcatcggcccatggacatccacatttaccatccctacctgctcaaccacccgtgccagacgaacaatggcggctgcagcaacctgtgcctcctctctcctggaggaggttacaagtgtgcctgtcccaccaacttctacctggccagtgaccaacgcacctgcatgtccaactgtacagccagccagtttgtgtgcaagaacgacaagtgcattcctttctggtggaaatgtgacacggaggatgattgcggcgaccggtctgacgagccggcggactgccctgagttcaaatgcaggccggggcagtttcagtgtggcacaggcatctgcaccaaccccgcctacatctgcgatggagacaacgactgccaggacaactcagatgaggccaactgtggtatgcctccttataaatggacattcaaatgttcccatccaagccgctgcatcccaggcatcttccgctgtaatggccaggacaactgcggagaaggagaggatgagaaagactgccctgaggtcacgtgtgcgcccacccagttccagtgtgccatcaccaaacgctgcatacctcgtgtctgggtgtgtgaccgcgacaatgactgtgtggacggatcagatgaacctgccaactgcacccagatgacttgtggcgtggatgagttccgctgtaaagactctggacgctgcatcccagctcgctggaagtgtgacggcgaggacgactgcggcgatgcgtcagatgaaccaaaagaggagtgtgctgagaggacatgtgagccgtaccagttcaggtgtaagaacaaccgctgtgtgccgggccgctggcagtgcgactacgacaacgactgtggggacaactcagatgaagacaagtgcatgcctcgacaatgttcagaaagtgagtttgcctgcacgaacggccgctgtattgctgggaggtggaagtgcgatggggaccatgactgtgctgatggatctgatgagcatggctgtgatctgaagtgtgacaacgaccagttccagtgtaagaacggacactgtatcccgatccgctggcggtgtgatgccgaccctgactgcatggacggcagcgatgaggagaattgtggcactgggcgtcactgccctgcagatgagttccagtgtaacaacactttgtgtaaacccctcgcctggaagtgtgacggggaggacgactgtggggacaactccgatgagaatccagaaatgtgcaggaagttccagtgtcctccaaccagagctttgcgctgccaaaacgaccgtgtgtgtctgcaagtgtcaaagaggtgcgacggtgtcaacaactgtggcgacaactcggatgaattgaactgccagacccctgcagctgttcccacatgtgagaaggacgagttcctgtgtgccaacaacagatgcatcagctccactctgcgctgtaacttctttaacgactgtgaggactacggctctgacgagatcaactgcaagacagacaccaaactaaatgactgcaggagcaacaggactcagtgtggtgatggagacgaggcccactgtttaaccaatggcacggactctttctgctcctgcaaaccaggcttccagaagaccggacaccgcacctgtggagatcagaatgagtgcctgcagttcggagtgtgttcccacatctgcaacaacaccaaaggctcctacaaatgcagctgccacaagtacttcacaaggatcaacgagacctgcaaggctgacagtgaggaccagagctgcattctctacatagctgatgacaatgaaatccgcagcctggaccctggcatgcctaactggcgctatgagcagaccttccagggcgacgccagtgtgcgtatcgatgcgatggacctgcacatcaagaccaaccgcatcttctggaccaactggcacacgggccgcatctcctcctacgagcttccaggaccgacaacgtcatcaacctcctccaactctcatcgcaacaaacggcagagtgagggcaggatcacaaacctgcagatcaaagagctgaagatgcctcgtggtattgctgtggactgggtggccggtaacctgtactggaccgactctggtcgagatgtcattgaagtggctcagatgtcgggccagcattgcaagacgctcatttccggcatgatagatgagccgtatgccatcgtagtggatccacagagaggtaccatgtattgggcagactgggggaaccatcctaaaattgagacagctgccatggacggtactctgagacaaacgcttgttcatgagaacatccagtggcccacaggtttggctgtggactacttcaacgagcgtctttactgggcggatgccaaactctcagtgattggcagcgttcgtctggatggttcggatcctgtcacttctgtgtccggcatcaaaaacaacctgctccatccattcagcatagatatcttcgaggactacatatatggcgtcacttatataaataatattgtcttccgagtcaacaagtttggcaaaggccccatggagaacctcaccacaggcatcaaccatgctactgacatagtcctctaccaccgttacaagcagccagagatgactaacccatgtgacaggaagaagtgtgagtggctgtgtctgctcagccccagtggaccggtgtgtacctgccctaacaactacatggctgacaacggcacgtgcgtggagagaccggcccccacccagtcaccattctgtaagtctgcattgcctcagctggtttgtaagcaattgcagtgtccttcatatcttccttgtgtcctaggtgctccaacctgcagatgtccaaagggcttcacagggcccaactgtgggcgccacacttgtcaggactactgcctgaacggaggcaactgcacggtcaacatgggcaaccagcccacctgtagctgcccagatgagtacaagggagaccagtgccagtacagtaaatgtgaaggcttctgtcaaaacggtggaacctgcttacaaacctctaatggcaccaaactctgtcagtgccccactcagtacatcggacaccagtgtgagctcgacaaatgtcagttctgcggaacgggcaagtgtttgacgtcaccgtcaggagaggtttcctgcagctgtcccaacggtcagacccagcccagctgcttcacctgtcgggactactgctcaaacggacaatgctcagttgacactcgcacactgctgcctcagtgcaagtgtcctgctggatgggagggatacaggtgtgaatttgcagcatctacagtcgattcttctacttcgggtggaaattccgcctccatcgtcatcccagtgctcctgctgctgctgctggcactgctggtggtcggcgccatcttgtggtacaagaggagaatgcgcggtgcgaagggtttccagcaccaccggatgacaaacggagccatgaatgttgagatcgggaatcctgcatataagatctatgaaggagaccctgacgatgacgctggggagctcctggattcagactttgctttggacccagacaagcccaccaacttcaccaacccagtgtatgccaccctgtacatgggcgcccacaacagccgcaactctctcgccagcacggatgaaaagaaggagcttctctcccagggcgacgaggacatgagcgacccgctggcgtag
>ENSSAUG00010006640|capn2b
atgtccggcgtggcctccaccctggccaagaagcgggccctggctgcgggcttcggcaccaacgccaatgcgacgcggtacctgaaccaggacttcaagaccctgcgggctcagtgtagttccgccgggaagctgttctgcgacccgaccttccccgccgcgcccgaagcgctgggcttcaacgagctgggccggagctcctacaaggtccgcggagtcacctggaagagacccacggaactggtctctaatcctgagttcatcttgggcggagccaccaggaccgacatctgccagggagctctaggtgactgctggctgttggcggccatcgcctcgctgacccttaacgagtatgtgatggccagagtcgttcccactgaccagggcttcggtgacgactacgccggcatcttccacttccagttctggcagtttggtgagtgggtggacgtggtgatcgacgaccgcctgccggtcaaagatggagagctgatgttcgtccactcggcggaggggagggagttctggagcgctctgctggagaaagcctacgccaaagtgaacggctgctatgaagcgctgtctggcggttccaccactgaaggatttgaagatttcaccggtggcatcgctgagaactacgacctccaacgtccccccgccaacctgttccagatcatcaagaaggccctggaggctggagcgctgctgggctgctccatcgacatcaccagcgccgcagactcggaggccgtcacccgtcagaagctggtgaaaggccacgcctactcactgacgggagctgtggaggtgaacttccgtggccggaatgagcggctggtgaggatgaggaacccgtggggtcaggtggagtggaccggagcgtggaagaatggctggatgtccttcagcgacttctgccgtcactataatcgtgttgagttgtgcactctgacccccgacaccatcgaagatgactctgtcaaacactggagcgtcagcaagttcgatggctcctggaggagaggatccaccgctggaggctgcaggaaccacccctacacgttctggatgaatcctcagtttgtgatcaagctggatgaggaggatgatgaccccgatgatggcgaagtgggctgcagctttgtggtcggtctgatccagaagaaccgcagaaagctccggaaacaaggagaggacatgcacaccgttgggtttgccatctatgaggtgagaactgaagacactttaggccagagggaggtgcatctggacaagaactacttcctgacccacgctcagacggcaaagtccgaaaccttcatcaacctgcgtgaggtctgctctcgcttcaagctgcccccgggagagtacctgatcgtcccgtccaccttcgaaccgcatctcaacggagacttctgcatccgtgtgttctctgagaagcagactgagacccacggtggagctcaggaccatcatgaacaagatcgtctccaaacgtacatcaaagctaaagcttcagcacccgctcacctgctcacctgctcacttgttcacctgttcacctgctcacctataacttcctgtctctccctcacaggaactgacatcaaaactgacggcttcagcctggagacctgcagggtcatggtcaacctgatggatgacagcgggaacgggaagctcggccttggagagttcgccaccttatggaagaaggtgcagagatacctgtccatctataagaagaacgactcggacaactcggggacgatgagcacgccggagatgagagtcgcctttaaagacgcaggtttcagcctcaacaacaccatctaccagctgctggtggctcgatactccgacccagacatgaccatcgacttcgacaacttcgtgggctgtctgatgaggctggagatgatgttcaggatcttcaagaagctcgacgctcaggacagcggctccatcgagctcgacttcaaccaggtgagaaccaacaacacgaacttcatcatgttgaatcggacccggtttcgcctctga
>ENSSAUG00010005440|igf2r
atgttcggccttgtttatcagtctatctggttgcctttgcacaaaaaattatgtgtaattgtttctttctatacaatatttaaaaatattatggtaacagactctctccacctccccccatctatatgggaagctatagaccgggataataaagtgagctatacgataaagctctgtgagtcgtcgccaacaaccagctgtggccccggcacagccgtctgcgctcaggacctcaccaccaaaacagaccagtctgtcggtgagtacggtacactgctctctgacagggtgctggacttcaatagcacacaaaaatgtccaggaagtgacaacaacattcagagcagcatcagcttccagtgtgggaaaaccatggggaccccagagtttgttgctgtgtctcagtgtgtgcattactttgagtggaggacgtacaccgcctgcaagaatgaccgattcaaaccacaaaaagaggtgccctgttacgtgttcgactctgacggcaagaacgacggctatctggtggacgatggtgacgacagtatcgacttctacatcaacatctgcagaagcctcaaccgtccagacaaatcctgtcctgaaggatctgcagcatgtctggtcaccagtcagggctcctacaacatgggcgctccctccaaacagctggagctggtctccagcgacagactgatgttacagtatgaagccagttccagtgtgactcctcccgaattctgccacggacacattcccgcagtcaccatcaccttcatctgtccatcaagcagacattcgggcagcactcctaagatgaccgcagaggtgaactgtcgctacgaggtgaactgggtgactgaatacgcctgtcacagagactacctggagagcaacaactgcaaactgaccagcgaacagcatgacatgtccatcgacctgacacccctcaccttggcctcagatattccgtacaaatcacattctgggcccagtgatggcgacgaaagctacatctactacctgaacgtgtgtggaaagatcccaaccacagaatgtgatggtgagaagtacatatcatcctgccaggtgaagaagtccggaaaggtgccgccgaaggtggctggaaaatataagaaccagacactacgttactcagatggagacctgactctgatctacccagatggcgccacgtgctccaccggcttccagagaatgaccatcatcaactttgagtgcaacaagactgcttccaatggcgggcgtggaaatccagtttttgcgggcgagacagactgcacttattattttgagtgggagacggcgttcgcctgcgtgaaggagaaggaggacctgctgtgtcgagtccgagaaggaaacaaacattacgacctttcacccctcacaagataccctggtgacgggaactgggaggccgtggacgctcagtctccgaggtcggactcacgtttctacctcaatgtctgtcacaaagtcatccagtcaggagctgctgatggctgcccgctgaacgcctccatctgtgccgtggataaggataacaggcacttcagtctgggcagcttcctctcctctccccataaggctcaactaggaaatgacatcagactggtctatactgaagggagtttttgcgacaatagaaagtcgaggatccaaacctttctgacactcaagtgcaaaccaggagatctggagagtgctcctgtcctgcgtagtgtttcctctgatggatgtaagtacgagttggagtggtacaccgctgccgcctgcgtcctctcgaagacgcagggagacgactgcaaggtggaggacgctcaggctgacctttccttcgacttgtcgcctctcaaaaaagacggcggctactacaacctgaccagcggaagctacgattactacatcaatgtgtgtggtcccgtcaacactgccaactgtcccgaaaaggccggagcgtgtcaggtcgaaacgagttcttggagtctcggagaagcgaactcccgtctgtcgtattacgacggcctgatcctgctgacctacagtaacggctcccgctacaacaacaaagaacacactctcagatccacactcatctcattcctctgtgacccgaaagctggagctggaaaacccgaattccaggctgaggacaactacacctataacttccactggtatacatcctacgcatgtcctgagaggcctcatgagtgtttggtgacagatccaaaatctcttgagcagtacgacttatccagtttgtcacgctccacctccagcagcaactgggaggtcttggatttgtctgaacccaagaacctgaagaagtactacatcaacatatgtcggccattaaacgctgtcccaggctgcgaccaccatgcgtctgtctgtcagatggactacatgtatgagcagggctccatgaaggagcgagtgtcagtcagtaacatgggtatgtccaagcgagggcctgtcatcgagggccgagaccggctgctgctggagttcaccgatgggtccgtctgcatttcggatggccagaggctcacgtacacgacacacatccacctggtctgctccagaggctctgagtcaacgggcccgcagttcctgatgtaccagaactgtaccgccaacttcaggtgggagacgagagcagcgtgtgccatcaccaccaccgagaatgatgtgagttctgaaattacaacagtgaatatctgcgcagacgtggcagaatgtggaaaggacatggctggctgtgagctggaagaagggcatcctgtgagcccagttggggtgaagaagaccctccagtactccacagatggccatctctcactaacctatcggggacaactggacagttccacagcaaagcgggacaccttcaccattaacttcgtgtgtgatccaaactctcatcccggctcgttaaaactgctgcaagaggacatgagctctttaccggacaacgttgtggtccacgacgtcctctttgagttctccaccgccctggcctgcatccctgctccagttgactgtcagatcattgattctcagggtaacgagtacgacctgaggcagctgatccgggacgtagacgacagcccctggatcgccatagacacagatggggtcaaatcacgcagcttttacatcaacatctgcaaacctctccccactgtgaaggactgtccaggtcagtgtgctcatccactttacttccccaagtcacctggttacaacctgggatacgtccagtcgaggccacaggcggcggaggacggctccatcagcatcctgtaccagaacggagaccgctgtggttctacgtcccgctactcaacgcgcgtcatcctccagtgtgatgaaaacccaggctcccccatgtttgaccgtgaagacggctgcgaatacatcttcatctggaggacatcgaaggcctgtcctgtcaggaagtctcaaggtgataactgtcgggtccgtgaccccaggactggctacgaatttgacctgagctctctgaaaggtaaagattacggcgtcaggaatgaaaagtacatgtatcacctgtccgtctgcgggccgctgcagaaaggcatctgtacccacatcaacaccggcaacgatactgtggcctcctgccaggtggatggactggcaaaccaggtcctgagttatgtcggagaacagctgatcctgaactacactaatggagagatctgtcatcggatctaccagagatccacagagatttacttctcctgccaccgtgacagacaccctgtgaagtttatcaaggagactgaggagtgtacctacctgttcagctggcccaccgctctggcctgcgtcccggtcaaaaccaccagctgctcctacaatgatggtcagggccactcgtacgacctctcccctctggcgatggactctcgcaactgggaggtggagcactctacagaggacacgaagaaaaacatttacatcaacgtgtgcaggtcgctggtgcagcagggaggctcatggaagtgtccctccagtgctgcgtcctgtatgaaggttggaggtgattatgtgagtctgggacaggtggagtccggtcccgtgtgggacagaggtgtcctgaagctgaagtacagcagcggccaggtctgtccagatggaatccgcaacagtagcagcatcatccgcttcaagtgtgaaaaagacaaagtggactcccgtcctactctgatctctgccgtcgagaactgtgtttacaatttcctctggctaacagctgctgcctgccctctaaacagcacccagcacggcgactgcagggtcaccaacccagcgacaggtcatttgtttgatctcaacaccctcacgaaggaaggaggttacaccgtgtaccaccaacaggaatacaagaagatgttccgcatgaacatctgtgggaacgtgaccaatgctggatctgtgtgcattaaggatacaaagactgcggtgagcggcggtcaggtgagcaggaaactctcatacaaagatcatgttctggagctgacatatgaaggaggaagtccctgcgcagcgaaccccaacatccaccacaaaaccatcatccacttcatctgcaggtacttcagactctgtttgatccttcatttttcattacatctttatttgtgttcgtgtgtgtcatttctggggcataacattcgtccagacttactttcctctgactgtatccttccagatgaggcgatggaccaaagtgatggaactccagacttctacatcaacatctgtcagcctcttaacccgatccccggggtcacctgcccccctggagcttctgtttgtatggatcctgatgatggacctcctgacatcgggcggacgaccagtggccctgagatcaacaatgtaacaggggaagtgtccatcacttacttcagctccaccaagtgtgtgtcgaaccctgcacagaactacacctcaaccatcatattcacctgccagagaggagtggagctgggttctccgcaaatgctgaagcggcagggatgtgtctatttgttcgagtgggcaactcccgtcgtctgttcagacaccacaaagaccagcggctgcaagctcaccgactcccagctgcagttcacctttgacctgtccaccctctctggtgaagtccaggtgacaggctccagcatgtatcacatcaacgtctgcggctcagtggcagagctggcctgtaagaacagtgccgtatgccgggtgtctggttctggttcagagaagactgcttcatcatttggcatcagcaaggccatgacgatggacttcaaacatgatgagcaggccgtgctgatgcagtatggtggaggagatttctgctcacctgtgaccactgagcgggaggtatgtgtgttccccttcacctacatgaagaagctgtacacagactgcaccacagatgggggcactgatggcaggaagtggtgcgccaccacctccaactacgacaaagacaagaagtttggatactgcaatgcgaataatggtcagtcatccatattgttcacctgcgaccagtctgcaggccacggctctccactgctgctctcagagacagcaggctgttcggccacgtttcagtggcggaccagtgccgtttgtcctccaaggaagatggagtgtaagctagtgagccaacatcagaccttcgacctccggactctgtcctccctcaccgagccgtggaagttcagccaccatggagattcatatttcatcaacctgtgtcaggggatccatggtggactaccaggttgtccagaggacgcgactgtgtgcagacgctcagcagcaggaaaagtccagatcctgggccgagtctatacacagaaaatgatctacactgacggaaagatctctgtcagctactcagctggagacgatgtctgtgggaacggcatgaaggccaagactgtgatgcagctgagctgtggctccactgtcggacaccctgccctcatcagtgctaatgaggcgtcatgtgagtttgtgattggctgggagactcggtcagcgtgtgccgtgaagcaacgggaggtgacaatcgtgaacgggacgatagaggttcctgatactggggccagcctcagtctgggagagctctacttcagccaccatcaggcgtctggagacatccgtcccaacggtgaccgctacatctaccacatccagctgtcaggcatcaccaacaactccctcagcagctgtctgggtgccaacatctgccaggttaaactcaacgggcagtacaggcgcaggattggctcctcaaacaaggccaagtactacattaaaggaggaaacctggatgtgatggtgccctctgagtcaacatgtggacgagagaagaccaaaatggcgtactccaccatcatgttccactgtaaccccactgcaggcgtcggcatccccgagttcatgctggagacggatgaatgccagtacctgtttgtgtggcacaccaaggctgtgtgtgcaaagtcatttgacgacaacagcgacaccctctctaggcggagcaaggcggtcggggtgatgctgacccttctgctggtgggtctggttgcctgtctgctcgggcttttactccacaagagagagaggagagagctggtgatccagaaggtcgccggctgctgcaggagaggaaaccaagtctcctataaatattccaaggtcaacatggatgaagaagggggtgaagaggagatggagtggctgatggaggagctcgaagccccgcccacatccttgtcctcctcctcccagcggggcaggagtaaccacggcaacggtcacatcacgaccaagccagtgaacacagacggcctgcgctcgttctctctggacgacccagacgacgacagcgaggacgaggtgctgagcgtccccggggtccgagtggtcaaatcctccggactctccaggcactctgcggccaatcgcagcgccttcctccaggtgagtattgcctctggcatcagtccaggtgttactgcgccctgtgagaaaagctcacagaagtctgtgatttcaggaggagagcgacgaggacctggtcggcctcctggaagagtcggacaggaagaggaagagcagcaaacctcgctcctcgggcatgaaccacggcaacaacacggcagccaatag
>ENSSAUG00010005337|cast
atgggccagatactgagctggatccgaggcccacgggacgccccggccctgcgggatgtggccgtggaggagcagtcgcagcctagccaggccacacccaaaccagccgctcaggtctccaccgtgaagcctgctcagtacgagaaggcttcatcaggatccgccatggctacaaagcctggggtggtttccacagcgacaggtggagccacaggaagtggcgtcaaagcaggaggaagtgcttcaattgggactgcaggaaaagagtcacctaaagccaaaacagagactaacactactccggcaggcgctactgttatcgacatgtcgtccgctgaggttgctattgttgacatgacatcagtggggtcgagaggcggtcctaaagagatgtcaaagactccaccaactgtctctcaaggtaaggccgcagctacagttccctctgctgctgctggagcggctgcagcagctggtgtggcggcgaccacacctaaagagtcacccaaaggcccagccaagagtgccgctgccatcacaacactcaaggctgatgtggctaaagttgatccggttaaaacatcaaagtcaacggcagcagccaaggtgcaggtggaggttcctcccacggcagccaaaggagcaaaagaggcacctgccgtggatccatttgatgccctggccagcatactgccatcagctgatcccgtcgcaccagagcctgtttacacggggccagaggtcaaagagcatgacgtcatctctgagaagggtcataagtgtggcgaaagagacgacacgctgcctccaggctacagatttaaagatatgcctgctgtccctgccgatgtcaaaccgaaggacgtccctaaaccactgagcacagacgaggccctggattctctttcagctggtttcatgtcttctaccactccagctgcaggcatgcagccagagaaaaagggccacgtcgacgttgtcagcgcctcatctgccggccctgctaacttcgcaccacctcctgtgcagaaatctcaaacctctgccgcagctcctcctgctgataaaaaagccaggatggagaaagcttctgatgatgtctctcagaaggctgggcgcccctctgctccttccaagagcgcaatgcctcaggacgctctcagtgctctcgttgactcgttgccagcagacataccaaaacctgaaccccccaaactcagacctgaggacatggtctcggagggtaaacacaagaaggagaagggtgttcttgtaggagagagggacgatacaattcatccgaactacaggtttgatgaggagaaactcaaaaaactgcctgctcccaaacctgagcccaaaatagccactagtgatgctctggactttttgtctgaaggcttcctggactcctcagtggctcctgtacagaaagcccctcctgttgctgtgtgtcctgctcctgctgataaaaaagccaagatggagaaagtcggtgatgatttctctctggaggccggactctctgcttcgacggccaagaaagtggaatcctgtgccgtcccccctgtggctgtgtgtctctctcctgctgatcaaaaagccaaagcagggaaaagtgctgccggaaaggacagcactgacggcaagctcaagaccgatctgggaaacatgcctctggacgctctcagtgctcttggtgactcgttggcagcagacaccccaagacctgaactccccgaagtcaaacctgaggacatggtctcggagggtaaacacaagaaggagaagggtgttcttgtaggagagagggacgatacaattcatccaaactacaggtttgatgaggagaaactcaaaaaactgcctgctcccaaacctgagcccaccttggcccccggcgaggctctggactttttgtctggagacctgatgacctcctcagcagctccctctgtccaggctcccgttgtcaccccctcagctcctcctgcacagaccaaagtagaggatttgtcagctctggatttactttcggacgattttgtggctccaaccaaagcttcaggagtccaggcccctgtccctccttctaccaagaagaagacaccagagaaaacggtttgtcccagctcagttgatgtcgctcctgcaaaacccaagactgacgactctttgtctctggacgctctcagtgctctcggtgacacactggcagcagacacaccaagacctgagctccccgaagtcaaacctgaggacatggtctcggagggcaaattcaaggaggagaagggtgttcttgtgggagagagggaggacacacttcctccagagtacaggtttgataaggacaaactccaaaagctgcctgctcccaaacccaagcccaccattggtactggagacgctctggactttttgtctggagacctgatgacctcctcagcagctcctgctgtccaggctcccgttgtcaccccctcggctcctcctgcacaggcctctgatgacttcgccctggatgccttggcaggagactttgtttccaccgctgctgctccagtagttaagtctggttttgctcccccaaagactgcccggcagctgtcagggggaacagacagcgccctggacgctttgtcagacaccttgaaggatatcacacccgcaccccagcccgccccggtcccgagtaaagacttcgtcaaggagaaaaagattgttgaagagaagctgataaagatgggagagagagacgactcgctgccgccagagtttcgacccacagaggaagagcgtaagaaaattgaagaatcaaagaaaaaggcagccgcagcacccaagcagtctatggatgataaaacagccttggacctgcttgccggtgatttcgaaactgctccaaagcccgctgcagctgccacatcgtgtgcagccgcgacaaagctggaacctcctgtgctggactcagatcccctgaagccaatggccggtcctgtcctggacaacctggcaagcacgctgctcccagaggcggtcaaaacaaagacagacaaaccaaagggcaagaacaagtcaaagtccaggtctaaaaaacaccacgcagaggagccatctgccaccgacctgctagcaggtcagctcagctcagacgtcgtgccaacatctacaaagaagggaggcaagagctagaccacttggtcggcggtgtaattcgtcctcccggccacaggggcgtgtcagcgagggggagcagctcgatggcgacgattctatttttctaaattgtcaagaatgtacagtttatgtgctggatgagagatgaacttaagacacacccatatcacttgctcgacacacacagacacacacagacacatacacacacggagctctgcctgcggcgcctttcttgctcggtttcgcctgtatttaaggatgagaggcttgtggtgtcaatgagatattttttttttttttaaactagatggagaatgagaaggggaagtgtgcagggacatagaggaattgaagacaagtgaaaatgttaaggttttttttctggttggtgtgatgagcttgccgaaggaagaaaggcgctgctcgtcagagtcctgcgcgcacatctcagctgacggtttccatggctcaagcgccactgatgtcacgcctcactgctcctgtgagctgtgacattggtcagcgcagcggtgactgtcagctggcctgggagcagtgaggagtgggtgtatagtatcgggatgtttgtgcaatcttgatgtacacagaaaaaaagccaagttttcttcttttttttttatcacgatgtggtcagacgccttaaggacactagtgtacagcttagtttgcttgtatttttggacaacacatagtttacatgatatctggaggattttccaggaggtgatctgcttaaatccgtattcgagagcttctcgcaaatgcctttaactttctggagagaactgtatgtcatgaggagggtctgtatgtatttggctgtgtagagaaaaaaaaaagaaatgctggcgtccaaaagtgcacttagtgagctgaggtggttacaagctttggaaactgcctttatttgtatactgtacacataaataaaaaaataaaaaaagattttttttgctctaca
>ENSSAUG00010007083|lrp2b
catccgacaattaaaagtgccactatcactgatttaattttaaagggaaactgtgacagtacacaattccagtgcactagtggacaatgcatcaacatactttggagatgtgatgggacaaaagactgccaggatgactcagatgagctgaactgtccggctccatcatgcacctcggaggaatttaagtgtgtgacaagcggtgaatgcatctcttcgggatttgtctgtgatggggatgaagactgtgaagatggctcagatgaacaaagagcttgtgacaggacctgcagctcagaccagttcagctgccaggagggtcagtgtatccctggcacatacagatgtgaccatgtaaaggactgcgtggatgactctgatgagaagaactgcgactatccacagtgcagtgagaagacgtgtgcaaatggggcctgttacaagaattctcagcactgcaatgggctgcaggactgcagagatggctctgatgaattcaactgtacaacgcagcactgtcccatacaccagtttgaatgtgcaaatggctactgtttgccactttcctttgtgtgtgaccactgggatgactgtggggatggcagtgatgagcaaggctgtgtgtacgagagctgtagcggcaatcagttcacgtgttccagtggccgttgtattcctcagcgctgggtgtgtgaccagttcaacgactgtggagatttcagtgatgagagaggatgtgatagtaactcccgagactgttaccctggtgagtggggctgccctggctcgacagcatgtatagcaataggcaaagtgtgtgatggcaaacccgactgtcctggagcaacagatgagaccaactccacagcacaggaaacatgcctggatcggtgttcagccttgagctgcgagtaccactgtcatgagtctcctcagggaggtacttgctactgccctgatggttatgctgtagctaatgacagtcgttcctgtgtagactatgatgactgtcagatctggggcatctgtgaccagctgtgtgaagatcgtcctggcacacaccactgtagctgtgctaatggatacttcttggagcagggtcatgtctgcaaggccaatgtgtcagatggactgccacagctaattttcacaaacgggggtgatgtgatgatggctgatatacacggacgctttgtcagaactctggtgccggctcagggcaaaggttatgccataggagttgcaacccactggaacagcggaaaagtcttctggagtgatatagacaccaacaaggtatattctgccaacttcaacgggggtgacatcaaggaggttctgacgactgcagtcctccatgtccagaatctcgctgtggactggatcaacttcaaactctatgtcttagagaccaggatggagcgtatcgacatgtgcaacttcgatggaggtgatcgggtcacgctggtggctgaaaacctgcagaatcctcatggcctcgccctggaccctacagtcggctacatgttcttcacggacatgggagaaagagatgagcagatgaagcttgaacgtgcctttatggacggcagtaaccgatttgagctagtgaagaccagactcggcattccaacaggaatcaccctagatattgtcacccagagggtctactggtctgacagccactttgacacagtggagactgtcacctacagcggtttggacaggaaaatagtcctcaatggtgcaacccaggctccgcatccttttggaattgctgtgtttgaaaaccatgtattcttcaccgactgggccaagatgggtgtgataagaaccaaccgctttgatggcagcaacccatcgcttatctatcgtactgcaaatcgaccgggccatgttgtggtctcacaccctgtcttgcaacctgttgtgatgaacccttgcggcagacacaatggcggctgtcagcagatctgtgtattgagtcaccgcactgacaacgatggtctgggcttccgctgcaagtgtcaccatggttacgacctacaacccgaccgccattcctgcttcaaggtgaaggacttcctgatgatcgccacctctctgggggtgcggggaattccactgaacttgtccctccaggaggacatcactttgcccctctcagggtttggggcgtcgttctctggctctgctgtggagtttgacggcagcgaaggctccattttctacaatgacaggtccagaggcctcgtctataagtcaaacctcaatggcacagtccaacagattctgaccggctacagagtcggatcgattgacgccatggcttatgactggacctccaaagtcttgttttggaccacgagcacctacagatccgtggtggcctacagaattacagacaaatccaggctagatattgtgacaggattgaggtacccaaaaggaatcgctgtgcatcctggtgttggcttcttgttttggtccgactggtaccgtccagcggtcataatgagagcgttcacagatggcaaaacaaggatttcaaggattaaaacaatgctgtactgggtggatgccgaattgaagcaggttggtcacattagcgtgtatggaactgacagacagacgtttaccaatcttggccagatcactcaacccttctctctgacaatttatacaggtgggaccagaggaatatttgagatgaggaagagggatggtggaggaaacataatgatcagacaaggaatcacaggcatcatgaatatcaaagcctacacagctgaccttcacacgatcaccagccagtgcaatatattgcccaacgggcgctgcagccacttctgtttcccaactccctcctacggtcgagtatgcggctgtccgtacggtatgaaactccaggtcaatcagagggactgcatcaaggatgattctgttcccccacctgacaccagctgtggcgaccaagcctttgcatgtgatgaaggccactgcacacccctctctcagcgctgtgatggaattgctgattgctttgataagactgacgaggctaactgcaccgatacagcgacctgttctccatgggctttcacctgcaacaacaagcactgcatccggtccagttggcgctgtgatggcatggatgactgcggcgacggctctgacgaagcaaactgtcccactggaatccctaaaacctgtgcctccaactactttacctgctacaacaacaggtgtatctctaaatcatggctgtgtgacggtatgaatgactgcggcgatggctctgatgaacacaactgcaactcaacaatcactacatgccctcctaactacttcctgtgtcctgaccaccggtgtctccacttctcctatgtgtgtgatggagaccaggactgcctggatggttctgatgagaaaaactgtgagtttacctgtgcatcctatgagtttgcctgtgccagtggggaccagtgtgtcagttccatgtatgagtgtgatggagtgttcgactgcagggaccactctgatgaacgggactgtcccactcgagggccaggcctctgccacgatgacgagttccagtgccagaccgacggattctgcataccagacaattgggagtgcgacggccatccagactgtgaggatggatcagacgaacacaactcctgcgggcctgtcacctgcacatccagctatttccagtgtgccaacaagctgtgcatcccgacatactgggtgtgcgatggcgacaacgactgcagggacatgagtgatgagcagaactgccccacccctccatttcgctgtccatccgaccagtggcagtgccccggagacctgctgtgcattgacctggacaaggtgtgcaacggccagagggactgccctaatggagcagatgagtcacctatctgcaaccaagatgactgtgcactgaacaacgggggctgcagtgacggctgcattcaaggaccatacggggctcagtgcacctgtcacccaggatatcagctccttaatgactccaagacctgcgaagacatcaacgagtgtctgatcccgggtttctgcagccagcagtgcttcaacgagaggggaaccttcaggtgctcctgctcacatggttacctcctcgagcctgatggacgcacctgcaaagcaataacagctgtacttctggttgcaagacgtagccagatcatcacccagcggatcaacgtgagaccaccactgatacatccactggtcagcggttcaagcatcgtgactgtagactttgatcacgtcacttccagaatctactgggctgatgcctcgcagaagaagataatgagttcctacgacaatggcaccgacatacgggaaatgttctcctctggtctgatggagccagagactatagctgtggactgggtggctcggaacctttactggaccgactctgtcatggagaacattgaggtttctactctggacggtcgctttcggaaagtcctcctcaccaagaatgtcacccgtccccgcggactagttttagacccccgtaactacaccaacctgatgttctggtcggactggggtcagaaccccaggatcgagcgagccaacatggatggatcctttagacaagtcattgtcagggataaggtctactggcccaacggcctgaccctggactacaccacacgcagggtctactttgctgatgcctacctcaaatacattgactactgtgactatgatggcaaaaaccgctatcaggtcatggcaagtgacatgcacccacatagtatgaccatctttgaggacagcatctactggtcagagcgctacaccagcaaagtgatgaggaccaacaagttccacggtggcaatgtcaccattatgttgaacgatgtgtaccagcccatgggcgtcgttatggaccatcccatcaaacagcctgcaggcctcaacccatgcaaagaccacccgtgctctcagctgtgcctgctgtcaggcctgagacccagatactacagatgcgactgtcagtctggctggaagcttgatactgacaaacgcacttgtgtcaaagatgagactcccttcttgatggtggtgagagattctgtgatctttggcattcctctggaccccgctgacccttctaacaacgcaatgactcctgtgtcaggcatcaccaaggggcgggacattgactttgatgaccaggagcagcttgtttattgggtgcagagcactggttctatatggcaagtggaaactagtggaaccaacaggtctgagtttgctccagctgctttcataggctcaccatccggtctggcttttgattggataggccgaataatgtattacaccaatcccaccgttaaatcgatagaggttatccgcgtggatggaaacgagcactacaggaagaccctcatcacctctactggtaaaccagagggcgtaggagagcctattggaattgcccttgatccagtcagagggagattgttttggacggacaagggctcagatagtggagttcctccaaaggttggcagcgctcaaatggacggaggaaatgtcatcaacctctacacagggaatctggttaacataggattcatcgccgctgacatctcaactcagaaactgtactggggcgtggcgggctcaggagtgatcgagtgtggcaccatggatggagtaactcgagtgacagtggtgagtggcctgtcccacccatgggggctggagattcacgagaatcacctttactacaccgacctggactttgaggtcattgagagggtggacaaggactctggtgccaacatggtggtgatgaggagcggcatgtctggcctccatgccatcaaagtgcatgccagagacaactcagcagggaccactaacgcctgcagctccaacaacgggggctgcccccacctctgcctgcccaagccaaacaatgagaagacctgtgcctgcaccacaggcttttacccgtctcatgatggcaccagctgtgaacagtatgaatctttcgctgttgtctccacctccaagtatatccgtggcttccacataaacagctcggaccactctgaggctatggtgcctgtcgctacctactccgttaagaccaagctggacctccattttgagtctggctttatatactgggctgacaacagcacctccagcacatacaggggcatcttcagggcgaaaacagatggagcgtcttacaggagtgtcatcacctcaggaattggaagaggtggcatccatggcctcgctgtagactggattgcaggtaacttatacttcacaaatgtctttgagagccagacctacctggaggtccttgccatcaacaccagctttcgaatgattctcctcaagtccaccaacgaccagcctcgtgatctggctgtcagccccaagcttcgctatctcttctggactgattatggccaaacacccaagattgagcgggccctgctggatggcaccaaccgcactgtgctggcatcagaaagcctagtgtcaccacgtggccttatagttgattacaccaacaatttcctctactggacagacgatgctctcgatatgatctcccgaatggccgcagatggaacacagagagagattatccgttatgggagccggtatccgtctccaacaggactggctatatttggaaacaacatgctgtgggtggataaaaagcttgggaagctcttacaggccagcaaggaccctgccaattccacccagccagaggtaattcgagacaatcttgatcagccaatggatgttgtcatctttgacgttcatgtccagcctacgtctgcccaccaggtgggcttcaacccatgtcacgaagataacggacggtgccagcagctctgcttcgccataccagaccaggaaaaaccaaaatgtggttgtgcacatgggtcactccttagtaatggagtcacatgtggttatggtctagatgagtttctaattttcaccacagactacacactgagtagcttgaggttagaccctgcagatcacagcgccccctatccaacggtgagcatgggctacggcttaatgggtttggattacgactttgaggataagcgaattttcttcacccagtatgcggggtatggtcggagcagaattggatccatcatcacgacatcggccaccagccctcctgtctttatagctacagaaggattggcatatgactgggtccacaagcgtctctacttcactgactactatgcccagaatgtgcagtccatgggcacggatgggacgaaccgctcaattatcgcccatggataccgtccgagagccatcattgtcgacccctgctatggttacctgtactggactgactggggctacccagccaagattgagagggccacattgggtggaaatttccgcaccgaaatcatcaacagcggtcttacaacacccaatggtctttctctggattatgaagaaaggatgctctactgggctgatgcctcaacaaaaaagattgagcgctgcactcttaacggtgagaaccgccaagtgatcctccagggggtccagtatccgtacgctatgactgtcttccaacaggacatcttctggaccgactggtctgagagagctatgtttagggctgcgaaggatgatggctctggcctcacagtgatagctcaggaaatgcagtaccgtcccaacgacatccacgtttataccggatctaagcaggagagctgctccagctcctgtcagcagttcaacggaggctgcagtcacgtctgtgtttctggtccatcaggtccagagtgccagtgtcctcatgaggggaagtggtacctggccaacaatggcaaagactgcatcaaagacacaggaaaccgctgtcagccagagcagttcacgtgcctcaacggtaattgcatctcttcgcattggaagtgtgacggtgtaaacgactgccaggataacacggatgagctggagagagtgtgcgccttccacacctgctcatccattgacttcacctgtgacaatggccgctgtgtgcggctctcatatgtgtgtgactacacaaatgactgtggtgacaacagcgacgagcgaggctgccccttccccacgtgtaatcctgcctctgagtttacctgcgccagcgggcgctgcatcagtgcagactttgtctgtaatggcatcaatgactgtagagacaacgcctctgacgaaatcaactgccctgacaggacgtgtcctgatggccggatcaagtgtgaccacaccaacatctgcattttccctgaaagcttgtgtgatggctacaacaactgtggagacaacagtgatgagaatcctctcttctgtggtaaaacctgcagttcaggccagttcacatgtacaaatggaaactgcattcccgggtcaatggtctgtgatggtaacaatgactgttgggacagtagcgatgaggctgttgaactacagtgtggtgagatacaatgtttatttcttagcctgtgtgaatgtaagactctagatctatttagccaacgtacctgcagttcaggccagttcacctgcccgacctggcacccaggccacccccgctgtataccattaagttttgtatgtgatggggacaaagactgtgccaacgcagctgatgagctccagaactgccccaaccgcacctgccatatgaacgagtttgcctgttccaacgggctctgcatcctcatcccctaccagtgtgaccgtgtgaacgactgcggggatggcagtgatgagttgggctgtacttatgacacctgcagcagcaacgagttcacctgcggtaacggagcctgcatctcttcccactacacctgtgacggcgcgagcgactgtctggatggttcagatgaggcggacagcttgtgcatcaagcctcagcccacatgttctcctcagcattacatgtgcaagtcaggcgagtgcattgacatcgctaaggtgtgcaacgggcagaaggactgccaggatgaaagcgacgaaaaaggctgcggaatcaacgagtgcaacaacccatcaatccacatgtgtgcccagatctgcaccgacaccctcaccgggtactactgctcctgcgaccccggctaccaactcatgccagatggcaaagcctgcgaggacattaacgagtgtgtgagcacgcccgctgtctgcagccaaatctgcgagaacgacgttggctcataccactgcaaatgtgccccagggtacatccgtgaagcggacggacgcacctgtcgtcagaacagtggcattgacccatacgtgttgtacactaatcgctactacatccgcaaagtgagcactgacggctcacagctgagtattgtcctgcaagggctgtccaatgtggtggcgttagattttgacgatgctgagaagaggctttactggctggatacagggacggggaagattgagaggatgcgcctcgacgggactgacagggagacactggcggatgatgaccttttgggagctgaaggcctgacgctggactgggtgggcaggaagctgtactggtccgactcttattacggctcacttcacgtgatggagctggatgggcgttaccagaagaagctgctgacaggacagttcacagatgggaatgccacctatatcatcagccgacctcgtgctgtggttgttaaccctaaatatggatggctatactggacggactggggtgacacagcgtatatcggcagagctggcatggacggcactaatgtcagtgccatcatcaccaccaagctggagtggcccaatgctctgaccatagactacaccaccaacaagatcttctttgctgattcccaccttaactttctggattttgcagacatggacggccagaaccgccaccgggccatcgctggcacacttccccatgtttttgcagtttccctgtttgaggactgggtttactggaccgactggaacacacacgcagtggagaaggcccacaagtacacaggcgaagaacgcacactcatgggcaacaacacacatcggccctcggacattcacatctaccacccctacagacagccgcgtgtgaacccctgcacctcccaccacctgacctgcagccacttgtgtctgattcgccctggtgggcaggaagctttctgcgagtgtccagatcacttcatcggtctctctgtgggcttcaagatccagtgtgtcgctgactgctccagcactcagttccgctgtggggacaacgagaagtgtgttcccatatggtggaagtgtgacggccagtcagattgcggcgatggctcagatgaacctgagacctgccctccccgtgtttgccccattggcacgttccagtgtcgggatggaaactgcacttaccccggcttcatctgtgacgctaaccctgactgccctgacagttcagacgaggatgcggctctctgcagtgaccaccgatgcgaggataaccaattccagtgtaaaaacaagaagtgcatccctgtgtcctatctctgcgatggttttgaagactgttcagatggcagcgacgaggtcacggagacttgttcccagttgacctgccctccgggacagttcaggtgtaacaacgggcgctgtttgccattgagctacgtgtgcgatgcccaggatgactgtggggatgcatccgatgagccttatgaaacctgcatgggtccagactacaagtgtgacgaaactgagttctcctgcaagacaaactaccgctgtatcccccagtgggcccgctgtgacggcaccaatgactgcctcgacaacagcgacgagcaaggctgtgaggacgtgacctgtgatcccctgggagatttccgatgtgacaaccaccgctgtgttcccatccgctggcagtgtgatggcaccaacgactgtggtgacggctcagacgagagggactgccagccaaggccttgctctgaaagtgagtttagatgtgatggtggactgtgcatccctggaacctgggtgtgcgaccacaagaacgactgcggggacaactctgatgagcgggactgtgagctgctgacgtgtcgtccaggttatttccaatgtgactcgggtcactgtatccccgagagtctggagtgtgatggccggcctgattgtcaggacctgtcagatgagaccagctgtcccacgcgttacccaggaggccgttggtgccctcaggatgagttccagtgtacgaaccgtctgtgtgtgagccagagctgggtgtgcgatggcatcgacgactgtggggatcgttctgacgaacagctcagtttgtgcttgaacgtcacctgcgagagtcctggacgcttccgttgtaagaacaactactgtatcttcagcggcctgctgtgcaaccagaaggacgactgtggggacaacagtgacgaagaggaggaactctgccgcgagcctacgctgcccccctgtacactggaggagttcaaatgcaccaacggacactgtgtggctctgccgtacgtgtgtgaccacaatgacaactgtggggaccgcacagacgaattaggctgcaagaaaaacatgaaaaaaaacatactcgtctctctctttttcaactcattctacgactgcgagtgtgcccccggctacagaaaagtgggtgacggcaacatgtgcgaggctgagggatcggctcccctgctgctgctaccggagaacatccgtatccggaagttcaacctgcaggcagagaccttccacgacttcctggaagaagaggagcatatcatggctctggactacgacttcgaccacaacaacactggattcagtatggtgtacttcactgtagccagtcagggtgctgcacgaggtgccattaagagagcgtacataccttcagtggatgatggcagtaataacatcgctgttgctgtcgacctcggcatcagatacatcaccacaccagacggcatagctgtggactgggtgggaaggaacctttactgggcagactccaagctgaagcggatagaggtggccatgttggatggacgctacaggaagcacttggtcaagactgaactgggccacccgtcagctgtggcagtcaacccacgactggggatgttgtactgggcggaccgtggtgacggcgcagccaagatcgagtgctcttggctggatggccaggagaggaaggtcctagtgggtgatggcctcggttggcccactggcctgtcaattgactttgctagtggtgacagaatctactggtctgactccaaggaaagccacatcgagtctgttctgccttcaggagatgggcatgtgagaaatcctttcagtgtttctgtgttcgaggaccatgtttattggagcactcaggagaaaggtgaggtttaccgacaggacaagttcggcaagggggtcaaaaccaagctgctgactgttggaccgtggctgacccaggtttctgtgtaccagcagcagagatacaactccaatccgtgtaagggaacctgcagccacctgtgtttgctccgaccaggaggttacagctgcgcctgccctgagggcaccagctttgctccaggcagtcacactgaatgtgatgctgggtttgatccaccacccaccatgcctcctccatgtcagtgtcaaaatggaggcacctgctactttgacgacaaccaggctctctgcatgtaa
>ENSSAUG00010007083|lrp2b
tgtgacagtacacaattccagtgcactagtggacaatgcatcaacatactttggagatgtgatgggacaaaagactgccaggatgactcagatgagctgaactgtccggctccatcatgcacctcggaggaatttaagtgtgtgacaagcggtgaatgcatctcttcgggatttgtctgtgatggggatgaagactgtgaagatggctcagatgaacaaagagcttgtggtaagacctgcagctcagaccagttcagctgccaggagggtcagtgtatccctggcacatacagatgtgaccatgtaaaggactgcgtggatgactctgatgagaagaactgcgactatccacagtgcagtgagaagacgtgtgcaaatggggcctgttacaagaattctcagcactgcaatgggctgcaggactgcagagatggctctgatgaattcaactgtacaacgcagcactgtcccatacaccagtttgaatgtgcaaatggctactgtttgccactttcctttgtgtgtgaccactgggatgactgtggggatggcagtgatgagcaaggctgtgtgtacgagagctgtagcggcaatcagttcacgtgttccagtggccgttgtattcctcagcgctgggtgtgtgaccagttcaacgactgtggagatttcagtgatgagagaggatgtgatagtaactcccgagactgttaccctggtgagtggggctgccctggctcgacagcatgtatagcaataggcaaagtgtgtgatggcaaacccgactgtcctggagcaacagatgagaccaactccacagcacaggaaacatgcctggatcggtgttcagccttgagctgcgagtaccactgtcatgagtctcctcagggaggtacttgctactgccctgatggttatgctgtagctaatgacagtcgttcctgtgtagactatgatgactgtcagatctggggcatctgtgaccagctgtgtgaagatcgtcctggcacacaccactgtagctgtgctaatggatacttcttggagcagggtcatgtctgcaaggccaatgtgtcagatggactgccacagctaattttcacaaacgggggtgatgtgatgatggctgatatacacggacgctttgtcagaactctggtgccggctcagggcaaaggttatgccataggagttgcaacccactggaacagcggaaaagtcttctggagtgatatagacaccaacaaggtatattctgccaacttcaacgggggtgacatcaaggaggttctgacgactgcagtcctccatgtccagaatctcgctgtggactggatcaacttcaaactctatgtcttagagaccaggatggagcgtatcgacatgtgcaacttcgatggaggtgatcgggtcacgctggtggctgaaaacctgcagaatcctcatggcctcgccctggaccctacagtcggctacatgttcttcacggacatgggagaaagagatgagcagatgaagcttgaacgtgcctttatggacggcagtaaccgatttgagctagtgaagaccagactcggcattccaacaggaatcaccctagatattgtcacccagagggtctactggtctgacagccactttgacacagtggagactgtcacctacagcggtttggacaggaaaatagtcctcaatggtgcaacccaggctccgcatccttttggaattgctgtgtttgaaaaccatgtattcttcaccgactgggccaagatgggtgtgataagaaccaaccgctttgatggcagcaacccatcgcttatctatcgtactgcaaatcgaccgggccatgttgtggtctcacaccctgtcttgcaacctgttgtgatgaacccttgcggcagacacaatggcggctgtcagcagatctgtgtattgagtcaccgcactgacaacgatggtctgggcttccgctgcaagtgtcaccatggttacgacctacaacccgaccgccattcctgcttcaaggtgaaggacttcctgatgatcgccacctctctgggggtgcggggaattccactgaacttgtccctccaggaggacatcactttgcccctctcagggtttggggcgtcgttctctggctctgctgtggagtttgacggcagcgaaggctccattttctacaatgacaggtccagaggcctcgtctataagtcaaacctcaatggcacagtccaacagattctgaccggctacagagtcggatcgattgacgccatggcttatgactggacctccaaagtcttgttttggaccacgagcacctacagatccgtggtggcctacagaattacagacaaatccaggctagatattgtgacaggattgaggtacccaaaaggaatcgctgtgcatcctggtgttggcttcttgttttggtccgactggtaccgtccagcggtcataatgagagcgttcacagatggcaaaacaaggatttcaaggattaaaacaatgctgtactgggtggatgccgaattgaagcaggttggtcacattagcgtgtatggaactgacagacagacgtttaccaatcttggccagatcactcaacccttctctctgacaatttatacagactacctgtatgtgtctgacacaaggaccagaggaatatttgagatgaggaagagggatggtggaggaaacataatgatcagacaaggaatcacaggcatcatgaatatcaaagcctacacagctgaccttcacagcagtaaccagtgcaatatattgcccaacgggcgctgcagccacttctgtttcccaactccctcctacggtcgagtatgcggctgtccgtacggtatgaaactccaggtcaatcagagggactgcatcaaggatgattctgttcccccacctgacaccagctgtggcgaccaagcctttgcatgtgatgaaggccactgcacacccctctctcagcgctgtgatggaattgctgattgctttgataagactgacgaggctaactgcaccgatacaggagcgacctgttctccatgggctttcacctgcaacaacaagcactgcatccggtccagttggcgctgtgatggcatggatgactgcggcgacggctctgacgaagcaaactgtcccactggaatccctaaaacctgtgcctccaactactttacctgctacaacaacaggtgtatctctaaatcatggctgtgtgacggtatgaatgactgcggcgatggctctgatgaacacaactgcaactcaacaatcactacatgccctcctaactacttcctgtgtcctgaccaccggtgtctccacttctcctatgtgtgtgatggagaccaggactgcctggatggttctgatgagaaaaactgtggtaagactcaccatgatttcactctttgttgtgttcttggggaccagtgtgtcagttccatgtatgagtgtgatggagtgttcgactgcagggaccactctgatgaacgggactgtcccactcgagggccaggcctctgccacgatgacgagttccagtgccagaccgacggattctgcataccagacaattgggagtgcgacggccatccagactgtgaggatggatcagacgaacacaactcctgcgggcctgtcacctgcacatccagctatttccagtgtgccaacaagctgtgcatcccgacatactgggtgtgcgatggcgacaacgactgcagggacatgagtgatgagcagaactgccccacccctccatttcgctgtccatccgaccagtggcagtgccccggagacctgctgtgcattgacctggacaaggtgtgcaacggccagagggactgccctaatggagcagatgagtcacctatctgcaaccaagatgactgtgcactgaacaacgggggctgcagtgacggctgcattcaaggaccatacggggctcagtgcacctgtcacccaggatatcagctccttaatgactccaagacctgcgaagacatcaacgagtgtctgatcccgggtttctgcagccagcagtgcttcaacgagaggggaaccttcaggtgctcctgctcacatggttacctcctcgagcctgatggacgcacctgcaaagcaataagtgagcaactcaaattagttgatgtattgccaagaggaaattggataccaccactgatacatccactggtcagcggttcaagcatcgtgactgtagactttgatcacgtcacttccagaatctactgggctgatgcctcgcagaagaagataatgagttcctacgacaatggcaccgacatacgggaagtaagtgaaatgatgactatagctgtggactgggtggctcggaacctttactggaccgactctgtcatggagaacattgaggtttctactctggacggtcgctttcggaaagtcctcctcaccaagaatgtcacccgtccccgcggactagttttagacccccgtaactacaccaacctgatgttctggtcggactggggtcagaaccccaggatcgagcgagccaacatggatggatcctttagacaagtcattgtcagggataaggtctactggcccaacggcctgaccctggactacaccacacgcagggtctactttgctgatgcctacctcaaatacattgactactgtgactatgatggcaaaaaccgctatcaggtcatggcaagtgacatggttctccagcacccacatagtatgaccatctttgaggacagcatctactggtcagagcgctacaccagcaaagtgatgaggaccaacaagttccacggtggcaatgtcaccattatgttgaacgatgtgtaccagcccatgggcgtcgttatggaccatcccatcaaacagcctgcaggcctcaacccatgcaaagaccacccgtgctctcagctgtgcctgctgtcaggcctgagacccagatactacagatgcgactgtcagtctggctggaagcttgatactgacaaacgcacttgtgtcaaagatgagactcccttcttgatggtggtgagagattctgtgatctttggcattcctctggaccccgctgacccttctaacaacgcaatgactcctgtgtcaggcatcaccaaggggcgggacattgactttgatgaccaggagcagcttgtttattgggtgcagagcactggttctatatggcaagtggaaactagtggaaccaacaggtctgagtttgctccagctgctttcataggctcaccatccggtctggcttttgattggataggccgaataatgtattacaccaatcccaccgttaaatcgatagaggttatccgcgtggatggaaacgagcactacaggaagaccctcatcacctctactggtaaaccagagggcgtaggagagcctattggaattgcccttgatccagtcagagggagattgttttggacggacaagggctcagatagtggagttcctccaaaggttggcagcgctcaaatggacggaggaaatgtcatcaacctctacacagggaatctggttaacataggattcatcgccgctgacatctcaactcagaaactgtactggggcgtggcgggctcaggagtgatcgagtgtggcaccatggatggagtaactcgagtgacagtggtgagtggcctgtcccacccatgggggctggagattcacgagaatcacctttactacaccgacctggactttgaggtcattgagagggtggacaaggactctggtgccaacatggtggtgatgaggagcggcatgtctggcctccatgccatcaaagtgcatgccagagacaggaccactaacgcctgcagctccaacaacgggggctgcccccacctctgcctgcccaagccaaacaatgagaagacctgtgcctgcaccacaggcttttacccgtctcatgatggcaccagctgtgaacagtatgaatctttcgctgttgtctccacctccaagtatatccgtggcttccacataaacagctcggaccactctgaggctatggtgcctgtcggtggacctacctactccgttaagaccaagctggacctccattttgagtctggctttatatactgggctgacaacagcacctccagcacatacaggggcatcttcagggcgaaaacagatggagcgtcttacaggagtgtcatcacctcaggaattggaagaggtggcatccatggcctcgctgtagactggattgcaggtaacttatacttcacaaatgtctttgagagccagacctacctggaggtccttgccatcaacaccagctttcgaatgattctcctcaagtccaccaacgaccagcctcgtgatctggctgtcagccccaagcttcgctatctcttctggactgattatggccaaacacccaagattgagcgggccctgctggatggcaccaaccgcactgtgctggcatcagaaagcctagtgtcaccacgtggccttatagttgattacaccaacaatttcctctactggacagacgatgctctcgatatgatctcccgaatggccgcagatggaacacagagagagattatccgttatgggagccggtatccgtctccaacaggactggctatatttggaaacaacatgctgtgggtggataaaaagcttgggaagctcttacaggccagcaaggaccctgccaattccacccagccagaggtaattcgagacaatcttgatcagccaatggatgttgtcatctttgacgttcatgtccagcctacgtctgcccaccaggtgggcttcaacccatgtcacgaagataacggacggtgccagcagctctgcttcgccataccagaccaggaaaaaccaaaatgtggttgtgcacatgggtcactccttagtaatggagtcacatgtggttatggtctagatgagtttctaattttcaccacagactacacactgagtagcttgaggttagaccctgcagatcacagcgccccctatccaacggtgagcatgggctacggcttaatgggtttggattacgactttgaggataagcgaattttcttcacccagtatgcggggtatggtcggagcagaattggatccatcatcacgacatcggccaccagccctcctgtctttatagctacagaaggattggcatatgactgggtccacaagcgtctctacttcactgactactatgcccagaatgtgcagtccatgggcacggatgggacgaaccgctcaattatcgcccatggataccgtccgagagccatcattgtcgacccctgctatggttacctgtactggactgactggggctacccagccaagattgagagggccacattgggtggaaatttccgcaccgaaatcatcaacagcggtcttacaacacccaatggtctttctctggattatgaagaaaggatgctctactgggctgatgcctcaacaaaaaagattgagcgctgcactcttaacggtgagaaccgccaagtgatcctccagggggtccagtatccgtacgctatgactgtcttccaacaggacatcttctggaccgactggtctgagagagctatgtttagggctgcgaaggatgatggctctggcctcacagtgatagctcaggaaatgcagtaccgtcccaacgacatccacgtttataccggatctaagcaggagagctgctccagctcctgtcagcagttcaacggaggctgcagtcacgtctgtgtttctggtccatcaggtccagagtgccagtgtcctcatgaggggaagtggtacctggccaacaatggcaaagactgcatcaaagacacaggaaaccgctgtcagccagagcagttcacgtgcctcaacggtaattgcatctcttcgcattggaagtgtgacggtgtaaacgactgccaggataacacggatgagctggagagagtgtgcgccttccacacctgctcatccattgacttcacctgtgacaatggccgctgtgtgcggctctcatatgtgtgtgactacacaaatgactgtggtgacaacagcgacgagcgaggctgccccttccccacgtgtaatcctgcctctgagtttacctgcgccagcgggcgctgcatcagtgcagactttgtctgtaatggcatcaatgactgtagagacaacgcctctgacgaaatcaactgccctgacaggacgtgtcctgatggccggatcaagtgtgaccacaccaacatctgcattttccctgaaagcttgtgtgatggctacaacaactgtggagacaacagtgatgagaatcctctcttctgtgcgggtcgtacatgccctccggaccagttccgttgcgatgaggggaagtgtatctctacctcttgggtgtgtgactccatccacgactgccgcgatgggacagatgaacctcctacttgtggtgagttctctttcacctgcccgacctggcacccaggccacccccgctgtataccattaagttttgtatgtgatggggacaaagactgtgccaacgcagctgatgagctccagaactgccccaaccgcacctgccatatgaacgagtttgcctgttccaacgggctctgcatcctcatcccctaccagtgtgaccgtgtgaacgactgcggggatggcagtgatgagttgggctgtacttatgacacctgcagcagcaacgagttcacctgcggtaacggagcctgcatctcttcccactacacctgtgacggcgcgagcgactgtctggatggttcagatgaggcggacagcttgtgcatcaagcctcagcccacatgttctcctcagcattacatgtgcaagtcaggcgagtgcattgacatcgctaaggtgtgcaacgggcagaaggactgccaggatgaaagcgacgaaaaaggctgcggaatcaacgagtgcaacaacccatcaatccacatgtgtgcccagatctgcaccgacaccctcaccgggtactactgctcctgcgaccccggctaccaactcatgccagatggcaaagcctgcgaggacattaacgagtgtgtgagcacgcccgctgtctgcagccaaatctgcgagaacgacgttggctcataccactgcaaatgtgccccagggtacatccgtgaagcggacggacgcacctgtcgtcagaacagtggcattgacccatacgtgttgtacactaatcgctactacatccgcaaagtgagcactgacggctcacagctgagtattgtcctgcaagggctgtccaatgtggtggcgttagattttgacgatgctgagaagaggctttactggctggatacagggacggggaagattgagaggatgcgcctcgacgggactgacagggagacactggcggatgatgaccttttgggagctgaaggcctgacgctggactgggtgggcaggaagctgtactggtccgactcttattacggctcacttcacgtgatggagctggatgggcgttaccagaagaagctgctgacaggacagttcacagatgggaatgccacctatatcatcagccgacctcgtgctgtggttgttaaccctaaatatggatggctatactggacggactggggtgacacagcgtatatcggcagagctggcatggacggcactaatgtcagtgccatcatcaccaccaagctggagtggcccaatgctctgaccatagactacaccaccaacaagatcttctttgctgattcccaccttaactttctggattttgcagacatggacggccagaaccgccaccgggccatcgctggcacacttccccatgtttttgcagtttccctgtttgaggactgggtttactggaccgactggaacacacacgcagtggagaaggcccacaagtacacaggcgaagaacgcacactcatgggcaacaacacacatcgtacgtacattttaactgtagatgcttatcgtctcaacggactataccacttgtgtctgattcgccctggtgggcaggaagctttctgcgagtgtccagatcacttcatcggtctctctgtgggcttcaagatccagtgtgtcgctgactgctccagcactcagttccgctgtggggacaacgagaagtgtgttcccatatggtggaagtgtgacggccagtcagattgcggcgatggctcagatgaacctgagacctgccctccccgtgtttgccccattggcacgttccagtgtcgggatggaaactgcacttaccccggcttcatctgtgacgctaaccctgactgccctgacagttcagacgaggatgcggctctctgcagtgaccaccgatgcgaggataaccaattccagtgtaaaaacaagaagtgcatccctgtgtcctatctctgcgatggttttgaagactgttcagatggcagcgacgaggtcacggagacttgttcccagttgacctgccctccgggacagttcaggtgtaacaacgggcgctgtttgccattgagctacgtgtgcgatgcccaggatgactgtggggatgcatccgatgagccttatgaaaccttgggtccagactacaagtgtgacgaaactgagttctcctgcaagacaaactaccgctgtatcccccagtgggcccgctgtgacggcaccaatgactgcctcgacaacagcgacgagcaaggctgtgaggacgtgacctgtgatcccctgggagatttccgatgtgacaaccaccgctgtgttcccatccgctggcagtgtgatggcaccaacgactgtggtgacggctcagacgagagggactgccagccaaggccttgctctgaaagtgagtttagatgtgatggtggactgtgcatccctggaacctgggtgtgcgaccacaagaacgactgcggggacaactctgatgagcgggactgtgagctgctgacgtgtcgtccaggttatttccaatgtgactcgggtcactgtatccccgagagtctggagtgtgatggccggcctgattgtcaggacctgtcagatgagaccagctgtcccacgcgttacccaggaggccgttggtgccctcaggatgagttccagtgtacgaaccgtctgtgtgtgagccagagctgggtgtgcgatggcatcgacgactgtggggatcgttctgacgaacagctcagtttgtgcttgaacgtcacctgcgagagtcctggacgcttccgttgtaagaacaactactgtatcttcagcggcctgctgtgcaaccagaaggacgactgtggggacaacagtgacgaagaggaggaactctgccgcgagcctacgctgcccccctgtacactggaggagttcaaatgcaccaacggacactgtgtggctctgccgtacgtgtgtgaccacaatgacaactgtggggaccgcacagacgaattaggctgcaatttcggcaatgatcgcaactgtgaggagaagctgtgccagcaggagtgcaccaacctgaacggcaccggcttcatctgctcctgtaggccaggatacatggtggaccaagaaaacaccttcacctgccaggacatcaatgagtgcgatgttttcggcacctgtcctcaactctgtaagaacacaaagggtagctacgactgcgagtgtgcccccggctacagaaaagtgggtgacggcaacatgtgcgaggctgagggatcggctcccctgctgctgctaccggagaacatccgtatccggaagttcaacctgcaggcagagaccttccacgacttcctggaagaagaggagcatatcatggctctggactacgacttcgaccacaacaacactggattcagtatggtgtacttcactgtagccagtcagggtgctgcacgaggtgccattaagagagcgtacataccttcagtggatgatggcagtaataacatcgctgttgctgtcgacctcggcatcagatacatcaccacaccagacggcatagctgtggactgggtgggaaggaacctttactgggcagactccaagctgaagcggatagaggtggccatgttggatggacgctacaggaagcacttggtcaagactgaactgggccacccgtcagctgtggcagtcaacccacgactggggatgttgtactgggcggaccgtggtgacggcgcagccaagatcgagtgctcttggctggatggccaggagaggaaggtcctagtgggtgatggcctcggttggcccactggcctgtcaattgactttgctagtggtgacagaatctactggtctgactccaaggaaagccacatcgagtctgttctgccttcaggagatgggcgtcaaactgccgtctacattgatgtgagaaatcctttcagtgtttctgtgttcgaggaccatgtttattggagcactcaggagaaaggtgaggtttaccgacaggacaagttcggcaagggggtcaaaaccaagctgctgactgttggaccgtggctgacccaggtttctgtgtaccagcagcagagatacaactccaatccgtgtaagggaacctgcagccacctgtgtttgctccgaccaggaggttacagctgcgcctgccctgagggcaccagctttgctccaggcagtcacactgaatgtgatgctgggtttgatccaccacccaccatgcctcctccatgtcagtgtcaaaatggaggcacctgctactttgacgacaaccaggctctctgcatgtaa
>ENSSAUG00010005440|igf2r
tactgatttggtccggagcggatagactctgctgtatcatgtcgtcttagtccggctccacagacagtatccaccacagtaaacatgtcatttctgtgcaaatctaaccgctcttcgcctccgaggctggttctgtggttagcggcgtgtctgggatgtttgttggtccggtccgctgcggagggggacgggagcctgtggtaccaggacctctgcagttataagtgggaagctatagaccgggataataaagtgagctatacgataaagctctgtgagtcgtcgccaacaaccagctgtggccccggcacagccgtctgcgctcaggacctcaccaccaaaacagaccagtctgtcggtgatctgtccatgcagcagctctctgacagggtgctggacttcaatagcacacaaaaatgtccaggaagtgacaacaacattcagagcagcatcagcttccagtgtgggaaaaccatggggaccccagagtttgttgctgtgtctcagtgtgtgcattactttgagtggaggacgtacaccgcctgcaagaatgaccgattcaaaccacaaaaagaggtatgtggtggaacatctgatggaagcactgacctcaaccctctgatcaaagtgagcgacggctatctggtggacgatggtgacgacagtatcgacttctacatcaacatctgcagaagcctcaacaaatcctgtcctgaaggatctgcagcatgtctggtcaccagtcagggctcctacaacatgggcgctccctccaaacagctggagctggtctccagcgacagactgatgttacagtatgaagccagttccagtgtgactcctcccgaattctgccacggacacattcccgcagtcaccatcaccttcatctgtccatcaagcagacattcgggcagcactcctaagatgaccgcagaggtgaactgtcgctacgaggtgaactgggtgactgaatacgcctgtcacagagactacctggagagcaacaactgcaaactgaccagcgaacagcatgacatgtccatcgacctgacacccctcaccttgggcccctcagatattccgtacaaatcacattctgggcccagtgatggcgacgaaagctacatctactacctgaacgtgtgtggaaagatcccaaccacagaatgtgatggtgagaagtacatatcatcctgccaggtgaagaagtccggaaaggtgccgccgaaggtggctggaaaatataagaaccagacactacgttactcagatggagacctgactctgatctacccagatggcgccacgtgctccaccggcttccagagaatgaccatcatcaactttgagtgcaacaagactgcttccaatggcgggcgtggaaatccagtttttgcgggcgagacagactgcacttattattttgagtgggagacggcgttcgcctgcgtgaaggagaaggaggacctgctgtgtcgagtccgagaaggaaacaaacattacgacctttcacccctcacaagataccctggtgacgggaactgggaggccgtggacgctcagtctccgaggtcggactcacgtttctacctcaatgtctgtcacaaagtcatccagtcaggagctgctgatggctgcccgctgaacgcctccatctgtgccgtggataaggataacaggcacttcagtctgggcagcttcctctcctctccccataaggctcaactaggaaatgacatcagactggtctatactgaagggagtttttgcgacaatagaaagtcgaggatccaaacctttctgacactcaagtgcaaaccaggagatctggagagtgctcctgtcctgcgtagtgtttcctctgatggatgtaagtacgagttggagtggtacaccgctgccgcctgcgtcctctcgaagacgcagggagacgactgcaaggtggaggacgctcaggctgacctttccttcgacttgtcgcctctcaaaaaagacggcggctactacaacctgaccagcggaagctacgattactacatcaatgtgtgtggtcccgtcaacactgccaactgtcccgaaaaggccggagcgtgtcaggtcgaaacgagttcttggagtctcggagaagcgaactcccgtctgtcgtattacgacggcctgatcctgctgacctacagtaacggctcccgctacaacaacaaagaacacactctcagatccacactcatctcattcctctgtgacccgaaagctggagctggaaaacccgaattccaggctgaggacaactacacctataacttccactggtatacatcctacgcatgtcctgagaggcctcatgagtgtttggtgacagatccaaaatctcttgagcagtacgacttatccagtttgtcacgctccacctccagcagcaactgggaggtcttggatttgtctgaacccaagaacctgaagaagtactacatcaacatatgtcggccattaaacgctgtcccaggctgcgaccaccatgcgtctgtctgtcagatggactacatgtatgagcaggagcgagtgtcagtcagtaacatgggtatgtccaagcgagggcctgtcatcgagggccgagaccggctgctgctggagttcaccgatgggtccgtctgcatttcggatggccagaggctcacgtacacgacacacatccacctggtctgctccagaggctctgagtcaacgggcccgcagttcctgatgtaccagaactgtaccgccaacttcaggtgggagacgagagcagcgtgtgccatcaccaccaccgagaatgatagctgtgctgtggtcgaccccaacactggcttcctgtttgaccttaagcttctagccttagagaagggatacaggacaaaggcaaatggaaaagacttcttggtgaatatctgcgcagacgtggcagaatgtggaaaggacatggctggctgtgagctggaagaagggcatcctgtgagcccagttggggtgaagaagaccctccagtactccacagatggccatctctcactaacctatcggggacaactggacacaaagcgggacaccttcaccattaacttcgtgtgtgatccaaactctcatcccggctcgttaaaactgctgcaagaggacatgagctctttaccggacaacgttgtggtccacgacgtcctctttgagttctccaccgccctggcctgcatccctgctccagttgactgtcagatcattgattctcagggtaacgagtacgacctgaggcagctgatccgggacgtagacgacagcccctggatcgccatagacacagatggggtcaaatcacgcagcttttacatcaacatctgcaaacctctccccactgtgaaggactgtccaggtcagttgggtcctttgggagcttgtggtataatcgatggaaagggttacaacctgggatacgtccagtcgaggccacaggcggcggaggacggctccatcagcatcctgtaccagaacggagaccgctgtggttctacgtcccgctactcaacgcgcgtcatcctccagtgtgatgaaaacccaggctcccccatgtttgaccgtgaagacggctgcgaatacatcttcatctggaggacatcgaaggcctgtcctgtcaggaagtctcaaggtgataactgtcgggtccgtgaccccaggactggctacgaatttgacctgagctctctgaaaggtaaagattacggcgtcaggaatgaaaagtacatgtatcacctgtccgtctgcgggccgctgcagaaaggcatctgtacccacatcaacaccggcaacgatactgtggcctcctgccaggtggatggcaccaaggagaagattggaggtacggaattgctgatcctgaactacactaatggagagatctgtcatcggatctaccagagatccacagagatttacttctcctgccaccgtgacagacaccctgtgagttttatcaaggagactgaggagtgtacctacctgttcagctggcccaccgctctggcctgcgtcccggtcaaaaccaccagctgctcctacaatgatggtcagggccactcgtacgacctctcccctctggcgatggactctcgcaactgggaggtggagcactctacagaggacacgaagaaaaacatttacatcaacgtgtgcaggtcgctggtgcagcagggaggctcatggaagtgtccctccagtgctgcgtcctgtatgaaggttggaggtgattatgtgagtctgggacaggtggagtccggtcccgtgtgggacagaggtgtcctgaagctgaagtacagcagcggccaggtctgtccagatggaatccgcaacagtagcagcatcatccgcttcaagtgtgaaaaagacaaagtggactcccgtcctactctgatctctgccgtcgagaactgtgtttacaatttcctctggctaacagctgctgcctgccctctaaacagcacccagcacggcgactgcagggtcaccaacccagcgacaggtcatttgtttgatctcaacaccctcacgaaggaaggaggttacaccgtgtaccaccaacaggaatacaagaagatgttccgcatgaacatctgtgggaacgtgaccaatgctggatgcagcccaggaaccggtatcggcggtcaggtgagcaggaaactctcatacaaagatcatgttctggagctgacatatgaaggaggaagtccctgcgcagcgaaccccaacatccaccacaaaaccatcatccacttcatctgcaggtacttcagactctgtttgatccttcatttttcattacatctttatttgtgtacctgcacacactacttctcattccacacaccgctcgtctgtgaacagccagtaataaagaacagtgcctatgaggcgatggaccaaagtgatggaactccagacttctacatcaacatctgtcagcctcttaacccgatccccggggtcacctgcccccctggagcttctgtttgtatggatcctgatgatggacctcctgtggacatcgggcggacgaccagtggccctgagatcaacaatgtaacaggggaagtgtccatcacttacttcagctccaccaagtgtgtgtcgaaccctgcacagaactacacctcaaccatcatattcacctgccagagaggaggttctccgcaaatgctgaagcggcagggatgtgtctatttgttcgagtgggcaactcccgtcgtctgttcagacaccacaaagaccagcggctgcaagctcaccgactcccagctgcagttcacctttgacctgtccaccctctctggtgaagtccaggtgacaggctccagcatgtatcacatcaacgtctgcggctcagtggcagagctggcctgtaagaacagtgccgtatgccgggtgtctggttctggttcagagaagactgcttcatcatttggcatcagcaaggccatgacgatggacttcaaacatgatgagcaggccgtgctgatgcagtatggtggaggagatttctgctcacctggtaagactgtatgtgtgttccccttcacctacatgaagaagctgtacacagactgcaccacagatgggggcactgatggcaggaagtggtgcgccaccacctccaactacgacaaagacaagaagtttggatactgcaattcatccatattgttcacctgcgaccagtctgcaggccacggctctccactgctgctctcagagacagcaggctgttcggccacgtttcagtggcggaccagtgccgtttgtcctccaaggaagatggagtgtaagctagtgagccaacatcagaccttcgacctccggactctgtcctccctcaccgagccgtggaagttcagccaccatggagattcatatttcatcaacctgtgtcaggggatccatggtggactaccaggttgtccagaggacgcgactgtgtgcagacgctcagcagcaggaaaagtccagatcctgggccgagtctatacacagaaaatgatctacactggtgggtgttcaagacactttagtgtctactcagctggagacgatgtctgtgggaacggcatgaaggccaagactgtgatgcagctgagctgtggctccactgtcggacaccctgccctcatcagtgctaatgaggcgtcatgtgagtttgtgattggctgggagactcggtcagcgtgtgccgtgaagcaacgggaggtgacaatcgtgaacgggacgatagaggttcctgatactggggccagcctcagtctgggagagctctacttcagccaccatcaggcgtctggagacatccgtcccaacggtgaccgctacatctaccacatccagctgtcaggcatcaccaacaactccctcagcagctgtctgggtgccaacatctgccaggttaaactcaacgggcagtacaggcgcaggattggctcctcaaacaaggccaagtactacattaaaggaggaaacctggatgtgatggtgccctctgagtcaacatgtggacgagagaagaccaaaatggcgtactccaccatcatgttccactgtaaccccactgcaggcgtcggcatccccgagttcatgctggagacggatgaatgccagtacctgtttgtgtggcacaccaaggctgtgtgtggtctcacaactgttgaagcaaagtcatttgacgacaacagcgacaccctctctaggcggagcaaggcggtcggggtgatgctgacccttctgctggtgggtctggttgcctgtctgctcgggcttttactccacaagagagagaggagagagctggtgatccagaaggtcgccggctgctgcaggagaggaaaccaagtctcctataaatattccaaggtcaacatggatgaagaagggggtgaagaggagatggagtggctgatggaggagctcgaagccccgcccacatccttgtcctcctcctcccagcggggcaggagtaaccacggcaacggtcacatcacgaccaagccagtgaacacagacggcctgcgctcgttctctctggacgacccagacgacgacagcgaggacgaggtgctgagcgtccccggggtccgagtggtcaaatcctccggactctccaggcactctgcggccaatcgcagcgccttcctccaggtgagtattgcctctggcatcagtccaggtgttactgcgccctgtgagaaaagctcacagaagtctgtgatttcaggaggagagcgacgaggacctggtcggcctcctggaagagtcggacaggaagaggaagagcagcaaacctcgctcctcgggcatgaaccacggcaacaacacggcagccaatag
>ENSSAUG00010008006|wnt5a
atgattctgtgcaccatgcttgaagaaataattaataattatggttttgacatatttaaagtgtctctggccatgaaccctttactgatccccgaggcctacatcatcggtgcccagcctctgtgcagccagctggtgggcctgtcgcagggccagaagaagctgtgccagctctaccaggaccacatgcagtacatcggcgaaggtgccaagacaggcatcagagagtgccagtaccagttcagacaccggcgctggaactgcagcactgtggacaactcctccgttttcggacggacggcattcacgtatgccatcagcgcggcaggagtggtgaacgcggtgagccgtgcctgcagggagggggagctctccagctgcgggtgcagccgggcggctcgccccaaagacctgccacgagactggctgtggggtggctgcggagataacctcaactacggctacaggttctccaaggagttcgtggatgcgcgcgagagggagaagagctaccccaagggctcatacgagagcgcccggctgcagatgaatctgcacaataacgaggcgggaaggaggacggtgtcggaccttgcccacgtgtcctgcaagtgccacggggtatcaggctcctgcagcctgaagacttgctggctgcagctggctgacttccgtaaggtgggcgacgcactcaaggaaaagtacgacagcgccgccgccatgaagctcaactcgcgtgggaagatggtgcagatgcacagcaggtacaacgctcccacgagccatgatctggtgtacatcgagtccagtccagactactgcctgaagaaccaaaccacaggctccctgggcacagtggggcgcctttgcaacaagacctcggagggcatggacgggtgtgagctgatgtgctgcggccgcggttacgaccagtacaaggcccagatagtggagcgctgccactgcaagttccactggtgctgctacgtcaagtgcaagcgctgcaccaaaatcgtagaccaattcgtctgcaagtgagcagaggattgtcgcctgcgtgtgtttgcttgcagacgacgggcatacatctgtatgtattcatgagcagaggagcagcagagttgaacacagagagagaatggaagaaactatataaattatatttatagagttaaacaattatgccattgcaaaaagactgactctttttaaaaaaaaaaaaatcttatgtcttcagaaactgagagtatcgtgaaatatttattttgagattgttatgttttattttggcccccagtcgtcaccagcccatttttaacccctttgagtgcctaaagctggctggaaatctcacccacccaactcccaccctgtttttaattacagaaaacacattttttttttccttgtcagatgagacacgctgattgccaaaaccggactgtgctttccatttcctaacaagagtagagtttgatatttgtggcacagttgactaagaggtcctggtttttgttgttttgagaatgactgtgttgagaggagaaccgcctctgtgctgtagtgtgcggatgtgtttttcacaggtccagtcccaaaaccagccttcacacacatccttaccaaagtctactcgtcccctctcaacacgtatatagagtaaggaaaaacactgttggtatgagtccttggagtacagtgggtacaataagagggcctttttggggattgggccatttattaagctgtcccagaagccttaagagttccccaggtgctgcaacaagccctccaccattatgcactttgatacagaggcttaaacctgactgtacgtgtctgttcagctgttttttgtttttgtttttttgttttctactaatgtgcatcagcaaatatatcaatattatagcctacattgttttccatattaattcagattatccatttaacattattctacaatacttaacatggtttgaatatatatgggcaatgttgtggtaacagtggtgaaatattccatgctctgtgtatatagtatgtctatccaaccaatcagtaaactgtatttattttctttaaccacctcctcctttttaagcttaaaaacagaaaaaaaaagataacatctccatcatagattaatattgagacggtcatccccaagatttgaagtcactttttctgggaaaaaaaaaaaaaaaagatttaattgtcactaatgcggctcttcactgtttttgtaaagggaaagcaaaccttattgtttttaaacacacagattatttcttctcactcagttcagcttcacacacacgtacaaatatatatgtatatgtatatatagtatatatatatatggtatatatatgtgtatgtgtgtgtatatatataatatatatatatatatatataatatataatatatatatatataatatatatatatatatatatatatatatatatatatatatataatttatatatatatatatatatatatatatattatatattatatatatattatatatatatatatatatataacatcacagatgttcagatttgatcgtcgcccacagatttccagtaccactccagtgaactgcccactatccctgtgatgattctcaatagaccaacagttttttctttccaatccaactatgtatatttataagcttctccatgaatgaatttgtggtttgttaaatgtaatgtgttatagctgatattttgttactttttacaaattggctcaatgctctactttttgttttcaataaatatcaaatgtaaaacca
>ENSSAUG00010006640|capn2b
atgtccggcgtggcctccaccctggccaagaagcgggccctggctgcgggcttcggcaccaacgccaatgcgacgcggtacctgaaccaggacttcaagaccctgcgggctcagtgtagttccgccgggaagctgttctgcgacccgaccttccccgccgcgcccgaagcgctgggcttcaacgagctgggccggagctcctacaaggtccgcggagtcacctggaagagacccacggaactggtctctaatcctgagttcatcttgggcggagccaccaggaccgacatctgccagggagctctaggtgactgctggctgttggcggccatcgcctcgctgacccttaacgagtatgtgatggccagagtcgttcccactgaccagggcttcggtgacgactacgccggcatcttccacttccagttctggcagtttggtgagtgggtggacgtggtgatcgacgaccgcctgccggtcaaagatggagagctgatgttcgtccactcggcggaggggagggagttctggagcgctctgctggagaaagcctacgccaaagtgaacggctgctatgaagcgctgtctggcggttccaccactgaaggatttgaagatttcaccggtggcatcgctgagaactacgacctccaacgtccccccgccaacctgttccagatcatcaagaaggccctggaggctggagcgctgctgggctgctccatcgacatcaccagcgccgcagactcggaggccgtcacccgtcagaagctggtgaaaggccacgcctactcactgacgggagctgtggaggtgaacttccgtggccggaatgagcggctggtgaggatgaggaacccgtggggtcaggtggagtggaccggagcgtggagcgacggatcgtctgagtggagccaggtgcagggagactgtccacatgccaacgcagaggacggagagttctggatgtccttcagcgacttctgccgtcactataatcgtgttgagttgtgcactctgacccccgacaccatcgaagatgactctgtcaaacactggagcgtcagcaagttcgatggctcctggaggagaggatccaccgctggaggctgcaggaaccacccctacacgttctggatgaatcctcagtttgtgatcaagctggatgaggaggatgatgaccccgatgatggcgaagtgggctgcagctttgtggtcggtctgatccagaagaaccgcagaaagctccggaaacaaggagaggacatgcacaccgttgggtttgccatctatgaggtgagaactgaagacactttaggccagagggaggtgcatctggacaagaactacttcctgacccacgctcagacggcaaagtccgaaaccttcatcaacctgcgtgaggtctgctctcgcttcaagctgcccccgggagagtacctgatcgtcccgtccaccttcgaaccgcatctcaacggagacttctgcatccgtgtgttctctgagaagcagactgagacccagccctgtgacgacccggtccaggctgaactagatgatgagacggtgtctgatgaggacgtggacgcagggttcagaggactcttctcgaaactcgctggagacgacatggagatctcagcggtggagctcaggaccatcatgaacaagatcgtctccaaacgaactgacatcaaaactgacggcttcagcctggagacctgcagggtcatggtcaacctgatggatgacagcgggaacgggaagctcggccttggagagttcgccaccttatggaagaaggtgcagagatacctgtccatctataagaagaacgactcggacaactcggggacgatgagcacgccggagatgagagtcgcctttaaagacgcaggtttcagcctcaacaacaccatctaccagctgctggtggctcgatactccgacccagacatgaccatcgacttcgacaacttcgtgggctgtctgatgaggctggagatgatgttcaggatcttcaagaagctcgacgctcaggacagcggctccatcgagctcgacttcaaccaggtgagaaccaacaacacgaacttcatcatgttgaatcggacccggtttcgcctctga
>ENSSAUG00010007812|lrp1ab
[truncated: 1,756,859 more chars]
