# Supplementary material for: The Emerging Role of Long Non-Coding RNAs in Development and Function of Gilthead Sea Bream (Sparus aurata) Fast Skeletal Muscle
Source: Cells. 2022 Jan 26;11(3):428. doi: 10.3390/cells11030428 (PMC8834446; doi:10.3390/cells11030428)
Supplement: Supplementary file 1 [file cells-11-00428-s001.zip › SUPPLEMENTARY FILES/Supplementary_File_2.pdf]

**Table:** Primers used in the Real-Time quantitative PCR analyzes.

| lncRNAs            | Primer sequences (5'-3')                                 | Ta (°C) | Efficiency (%) | Amplicon (bp) | Transcript ID (Ensembl) or Accession number (NCBI) |
|--------------------|----------------------------------------------------------|---------|----------------|---------------|----------------------------------------------------|
| <i>lncRNA14696</i> | F: GATAGCGGCAGTTGGGTAAA<br>R: CAAAGAGAGGGAGAGCATCG       | 55      | 92.2           | 119           | ENSSAUT00010014696                                 |
| <i>lncRNA16861</i> | F: TGCAGTATGACTTGAGTGAAAAA<br>R: AGTTGCTGTTTTGCCTCCTT    | 54      | 102.4          | 79            | ENSSAUT00010016861                                 |
| <i>lncRNA20194</i> | F: GGACACGTAGACGCTGTGAA<br>R: CCTCCAAACAGTCGCTCAA        | 55      | 98.0           | 120           | ENSSAUT00010020194                                 |
| <i>lncRNA21817</i> | F: TGACAAAAACCTCAGGGATTG<br>R: CTTGCGTGCTCTGTGGTAA       | 55      | 90.3           | 129           | ENSSAUT00010021817                                 |
| <i>lncRNA40141</i> | F: TTCCCTGTTTCTGGAGGATG<br>R: GGAGCATTTCTGTTGTGT         | 55      | 115.3          | 200           | ENSSAUT00010040141                                 |
| <i>lncRNA54283</i> | F: CTGCTGTGATCAGCGGTTT<br>R: AAAACGAGGTGGAAATGTGC        | 55      | 110.1          | 110           | ENSSAUT00010054283                                 |
| <i>lncRNA60660</i> | F: GCCTGACTCTCCATTGAAGC<br>R: ACAGCTCCCATCAGCTCACT       | 55      | 91.4           | 147           | ENSSAUT00010060660                                 |
| <i>lncRNA02328</i> | F: GAGGAAGGCTGGACTGTGAG<br>R: GTGGAGCTCTGCCCATAGAG       | 55      | 95.1           | 197           | ENSSAUT00010002328                                 |
| <i>lncRNA62925</i> | F: CGCATCCAATCAAAAGAGGT<br>R: CAGGATCTCACCCACAACACT      | 55      | 92.2           | 116           | ENSSAUT00010062925                                 |
| <i>lncRNA31317</i> | F: GTTGTTCAAGTTTCCCTCA<br>R: GTCGGCGTTTCTTTCCATA         | 55      | 112.5          | 153           | ENSSAUT00010031317                                 |
| <i>lncRNA43061</i> | F: TACGTTGGGAGGATGAGGAG<br>R: TGTACGCAGCCATAAAGCAG       | 55      | 200.2          | 199           | ENSSAUT00010043061                                 |
| <i>lncRNA05337</i> | F: ATGACGCCTCCATTCACTCCTCT<br>R: AGCTTTCCTGTGACAACGGTTGC | 62      | 100.1          | 81            | ENSSAUT00010005337                                 |
| <i>myf5</i>        | F: CCATCCAGTACATCGAGAGCC<br>R: ATCGCCCAAAGTGTCGTTCT      | 56      | 98.9           | 209           | JN034420.1                                         |
| <i>myod1</i>       | F: TTTGAGGACCTGGACCC<br>R: CTTCTGCGTGGTGATGGA            | 60      | 96.4           | 139           | AF478568                                           |
| <i>myod2</i>       | F: CACTACAGCGGGGATTGAGAC<br>R: CGTTTGCTTCTCCTGGACTC      | 60      | 101.2          | 149           | AF478569                                           |
| <i>myog</i>        | F: CAGAGGCTGCCCAAGGTCGAG<br>R: CAGGTGCTGCCCGAACTGGGCTCG  | 68      | 96.7           | 182           | EF462191.1                                         |
| <i>mef2c</i>       | F: ACAGCTTGTTGGTGCTGTTG<br>R: AGATAGCGCGAATCATGGAC       | 55      | 96.4           | 144           | XM_030435338.1                                     |

|               |                                                                |    |       |     |                    |
|---------------|----------------------------------------------------------------|----|-------|-----|--------------------|
| <i>myf6</i>   | F: CATCCCACAGCTTTAAAGGCA<br>R: GAGGACGCCGAAGATTCAC             | 60 | 100.6 | 151 | JN034421           |
| <i>cdh15</i>  | F: GGCCTTCGTGGGTAGATAGG<br>R: TTAAACGTGCACCTGCTGTG             | 55 | 96.7  | 149 | XM_030414763.1     |
| <i>cav3</i>   | F: CTGAGGGTGTGGACAAGGTCG<br>R: GTCAGGCCACGATAAACCCA            | 55 | 98.5  | 133 | XM_030420899.1     |
| <i>mymx</i>   | F: TGCTGCGGTCCCTGGTTATC<br>R: ACTCCTGGGATCGAATGCGG             | 60 | 92.4  | 144 | ENSSAUG00010011859 |
| <i>mymk</i>   | F: TTCACTGCGGTTTACCACGC<br>R: CCCACATAGAGAGAGCTGTGCTG          | 59 | 98.9  | 112 | ENSSAUG00010019449 |
| <i>dock5</i>  | F: TCAACAGGCCCAGTAAATCC<br>R: GGGAAGCAGTTCCATCATC              | 60 | 95.2  | 115 | XM_030416547.1     |
| <i>crk-a</i>  | F: AACGCCCAGAACTCTGAAGG<br>R: ACCATGTGCCCCACCTCTAA             | 57 | 96.4  | 314 | ENSSAUG00010004157 |
| <i>crk-b</i>  | F: ATGCCCAGCCATTCAGAAG<br>R: TACCATGTCTCCACCTCCAGA             | 59 | 95.8  | 77  | ENSSAUG00010012872 |
| <i>crkl</i>   | F: TCCGCCTGGTATTTTGGACC<br>R: TGTGCTGCTTGGGTACCTGG             | 59 | 90.9  | 294 | ENSSAUG00010019265 |
| <i>ef1a</i>   | F: CTTCAACGCTCAGGTCATCAT<br>R: GCACAGCGAAACGACCAAGGGGA         | 60 | 96.6  | 263 | AF184170.1         |
| <i>rps18</i>  | F: GGGTGTTGGCAGACGTTAC<br>R: CTTCTGCCTGTTGAGGAACCA             | 60 | 97.7  | 163 | AM490061.1         |
| <i>rpl27a</i> | F: AAGAGGAACACAACCTCACTGCCCCAC<br>R: GCTTGCCTTTGCCAGAACTTTGTAG | 60 | 97.7  | 160 | AY188520.1         |

---

Ta: annealing temperature; F: forward; R: reverse; Amplicon: product size (base pairs).
