# Supplementary material for: The Emerging Role of Long Non-Coding RNAs in Development and Function of Gilthead Sea Bream (Sparus aurata) Fast Skeletal Muscle
Source: Cells. 2022 Jan 26;11(3):428. doi: 10.3390/cells11030428 (PMC8834446; doi:10.3390/cells11030428)
Supplement: Supplementary file 1 [file cells-11-00428-s001.zip › SUPPLEMENTARY FILES/Supplementary_File_3.txt]

ENSSAUT00010027070 ENSSAUT00010053438 ENSSAUT00010039739 ENSSAUT00010044179 ENSSAUT00010012596 ENSSAUT00010002918 ENSSAUT00010007355 ENSSAUT00010009797 ENSSAUT00010020088 ENSSAUT00010036666 ENSSAUT00010041293 ENSSAUT00010011570 ENSSAUT00010010205 ENSSAUT00010047794 ENSSAUT00010012363 ENSSAUT00010032478 ENSSAUT00010041027 ENSSAUT00010068892 ENSSAUT00010058063 ENSSAUT00010016771 ENSSAUT00010003683 ENSSAUT00010016307 ENSSAUT00010026629 ENSSAUT00010020276 ENSSAUT00010009173 ENSSAUT00010068692 ENSSAUT00010020194 ENSSAUT00010028681 ENSSAUT00010060660 ENSSAUT00010060015 ENSSAUT00010003620 ENSSAUT00010050263 ENSSAUT00010000328 ENSSAUT00010066080 ENSSAUT00010068663 ENSSAUT00010046519 ENSSAUT00010054675 ENSSAUT00010070281 ENSSAUT00010041525 ENSSAUT00010040193 ENSSAUT00010023653 ENSSAUT00010069760 ENSSAUT00010033221 ENSSAUT00010008623 ENSSAUT00010016117 ENSSAUT00010048053 ENSSAUT00010020145 ENSSAUT00010002688 ENSSAUT00010053787 ENSSAUT00010006069 ENSSAUT00010045424 ENSSAUT00010021489 ENSSAUT00010026389 ENSSAUT00010000391 ENSSAUT00010045549 ENSSAUT00010053000 ENSSAUT00010040988 ENSSAUT00010004772 ENSSAUT00010035147 ENSSAUT00010073193 ENSSAUT00010042863 ENSSAUT00010036366 ENSSAUT00010069153 ENSSAUT00010034905 ENSSAUT00010026352 ENSSAUT00010006500 ENSSAUT00010012480 ENSSAUT00010045442 ENSSAUT00010045130 ENSSAUT00010008803 ENSSAUT00010039261 ENSSAUT00010014541 ENSSAUT00010040154 ENSSAUT00010061365 ENSSAUT00010064314 ENSSAUT00010020193 ENSSAUT00010007153 ENSSAUT00010002759 ENSSAUT00010011614 ENSSAUT00010004760 ENSSAUT00010000337 ENSSAUT00010055738 ENSSAUT00010034510 ENSSAUT00010003649 ENSSAUT00010028177 ENSSAUT00010003955 ENSSAUT00010013342 ENSSAUT00010027678 ENSSAUT00010008957 ENSSAUT00010036625 ENSSAUT00010025052 ENSSAUT00010031899 ENSSAUT00010040960 ENSSAUT00010002224 ENSSAUT00010026519 ENSSAUT00010006966 ENSSAUT00010050175 ENSSAUT00010021817 ENSSAUT00010049993 ENSSAUT00010036016 ENSSAUT00010008692 ENSSAUT00010058574 ENSSAUT00010070743 ENSSAUT00010024229 ENSSAUT00010036555 ENSSAUT00010063640 ENSSAUT00010022316 ENSSAUT00010008387 ENSSAUT00010036844 ENSSAUT00010053726 ENSSAUT00010049055 ENSSAUT00010023621 ENSSAUT00010026468 ENSSAUT00010022323 ENSSAUT00010009848 ENSSAUT00010047613 ENSSAUT00010034924 ENSSAUT00010012927 ENSSAUT00010012188 ENSSAUT00010049092 ENSSAUT00010006395 ENSSAUT00010000389 ENSSAUT00010039128 ENSSAUT00010011217 ENSSAUT00010043776 ENSSAUT00010023619 ENSSAUT00010032061 ENSSAUT00010040958 ENSSAUT00010008055 ENSSAUT00010011682 ENSSAUT00010020915 ENSSAUT00010029842 ENSSAUT00010007258 ENSSAUT00010025807 ENSSAUT00010058336 ENSSAUT00010016861 ENSSAUT00010029843 ENSSAUT00010054677 ENSSAUT00010030327 ENSSAUT00010048019 ENSSAUT00010005947 ENSSAUT00010011613 ENSSAUT00010043061 ENSSAUT00010028421 ENSSAUT00010022254 ENSSAUT00010059448 ENSSAUT00010063067 ENSSAUT00010011800 ENSSAUT00010040430 ENSSAUT00010011620 ENSSAUT00010020826 ENSSAUT00010042942 ENSSAUT00010004433 ENSSAUT00010020106 ENSSAUT00010052095 ENSSAUT00010060219 ENSSAUT00010045094 ENSSAUT00010057260 ENSSAUT00010061609 ENSSAUT00010040205 ENSSAUT00010053741 ENSSAUT00010020235 ENSSAUT00010069346 ENSSAUT00010031317 ENSSAUT00010000657 ENSSAUT00010009711 ENSSAUT00010039352 ENSSAUT00010064775 ENSSAUT00010026356 ENSSAUT00010041294 ENSSAUT00010006671 ENSSAUT00010012703 ENSSAUT00010000355 ENSSAUT00010002328 ENSSAUT00010022318 ENSSAUT00010040432 ENSSAUT00010053783 ENSSAUT00010057880 ENSSAUT00010011564 ENSSAUT00010029509 ENSSAUT00010030253 ENSSAUT00010016310 ENSSAUT00010005966 ENSSAUT00010003272 ENSSAUT00010021858 ENSSAUT00010014268 ENSSAUT00010004079 ENSSAUT00010020198 ENSSAUT00010054283 ENSSAUT00010060218 ENSSAUT00010052763 ENSSAUT00010006072 ENSSAUT00010005338 ENSSAUT00010040428 ENSSAUT00010003176 ENSSAUT00010047348 ENSSAUT00010046426 ENSSAUT00010046128 ENSSAUT00010045458 ENSSAUT00010009840 ENSSAUT00010063103 ENSSAUT00010043062 ENSSAUT00010008849 ENSSAUT00010004458 ENSSAUT00010030776 ENSSAUT00010017606 ENSSAUT00010062925 ENSSAUT00010012313 ENSSAUT00010057888ENSSAUT00010004435 ENSSAUT00010011904 ENSSAUT00010014696 ENSSAUT00010002840 ENSSAUT00010003219 ENSSAUT00010056984 ENSSAUT00010018272 ENSSAUT00010065134 ENSSAUT00010022876 ENSSAUT00010029498 ENSSAUT00010066189 ENSSAUT00010027078 ENSSAUT00010039119 ENSSAUT00010040141 ENSSAUT00010058959 ENSSAUT00010036436 ENSSAUT00010034771ENSSAUT00010052140 ENSSAUT00010040967 ENSSAUT00010002609 ENSSAUT00010037634 ENSSAUT00010029951 ENSSAUT00010020103 ENSSAUT00010057050 ENSSAUT00010067805 ENSSAUT00010012192 ENSSAUT00010008921 ENSSAUT00010035146 ENSSAUT00010058055 ENSSAUT00010071043 ENSSAUT00010040180 ENSSAUT00010024021 ENSSAUT00010034494 ENSSAUT00010040968 ENSSAUT00010035247 ENSSAUT00010012268 ENSSAUT00010003475 ENSSAUT00010012312 ENSSAUT00010047263 ENSSAUT00010022324 ENSSAUT00010011565 ENSSAUT00010060048 ENSSAUT00010020758 ENSSAUT00010008622 ENSSAUT00010055283 ENSSAUT00010064800 ENSSAUT00010022935 ENSSAUT00010069069 ENSSAUT00010016127 ENSSAUT00010002923 ENSSAUT00010020126 ENSSAUT00010040997 ENSSAUT00010011388 ENSSAUT00010004765 ENSSAUT00010051323 ENSSAUT00010003144 ENSSAUT00010029883 ENSSAUT00010046584 ENSSAUT00010004055 ENSSAUT00010001689 ENSSAUT00010037726 ENSSAUT00010049099 ENSSAUT00010014436 ENSSAUT00010011216 ENSSAUT00010036432 ENSSAUT00010027106 ENSSAUT00010039349 ENSSAUT00010000348 ENSSAUT00010070983 ENSSAUT00010015437 ENSSAUT00010059328 ENSSAUT00010020215 ENSSAUT00010011219 ENSSAUT00010018500 ENSSAUT00010037100 ENSSAUT00010016923 ENSSAUT00010040258 ENSSAUT00010023625 ENSSAUT00010058955 ENSSAUT00010049589 ENSSAUT00010001502
